# Supplementary material
Source: publisher figshare collection journal article supplement (https://acs.figshare.com/ndownloader/files/24733711)
Supplement: Supplementary file 1 [file 24733711]

# Bioactivity-Guided Discovery of Human Carboxylesterase Inhibitors from the Roots of *Paeonia lactiflora*

Jing-Fang Zhang<sup>†,‡</sup>, Wan-Chao Zhong<sup>†,‡</sup>, Yan-Cheng Li<sup>†</sup>, Yun-Qing Song<sup>‡</sup>, Gui-Yang Xia<sup>†,§</sup>, Gui-Hua Tian<sup>\*,§</sup>, Guang-Bo Ge<sup>\*,‡</sup> and Sheng Lin<sup>\*,†,§</sup>

<sup>†</sup>State Key Laboratory of Bioactive Substance and Function of Natural Medicines, Institute of Materia Medica, Chinese Academy of Medical Sciences and Peking Union Medical College, Beijing, China

<sup>‡</sup>Institute of Interdisciplinary Integrative Medicine Research, Shanghai University of Traditional Chinese Medicine, Shanghai, China.

<sup>§</sup>Key Laboratory of Chinese Internal Medicine of Ministry of Education and Beijing, Dongzhimen Hospital, Beijing University of Chinese Medicine, Beijing, China.

## Supplementary Information

## The List of Contents

| no. | Contents                                                                                                            | Page  |
|-----|---------------------------------------------------------------------------------------------------------------------|-------|
| 1   | <b>Figure S1.</b> The UV Spectrum of Compound <b>1</b> in MeOH                                                      | 5     |
| 2   | <b>Figure S2.</b> The CD Spectrum of Compound <b>1</b> in MeOH                                                      | 5     |
| 3   | <b>Figure S3.</b> The HR-mass Spectrum of Compound <b>1</b> in MeOH                                                 | 6     |
| 4   | <b>Figure S4.</b> The IR Spectrum of Compound <b>1</b>                                                              | 6     |
| 5   | <b>Figure S5.</b> The $^1\text{H}$ NMR Spectrum of Compound <b>1</b> in $\text{CDCl}_3$ (600MHz)                    | 7     |
| 6   | <b>Figure S6.</b> The $^{13}\text{C}$ NMR Spectrum of Compound <b>1</b> in $\text{CDCl}_3$ (150MHz)                 | 8     |
| 7   | <b>Figure S7.</b> The $^1\text{H}$ - $^1\text{H}$ COSY Spectrum of Compound <b>1</b> in $\text{CDCl}_3$ (600MHz))   | 9     |
| 8   | <b>Figure S8.</b> The HSQC Spectrum of Compound <b>1</b> in $\text{CDCl}_3$ (600MHz)                                | 10    |
| 9   | <b>Figure S9.</b> The HMBC Spectrum of Compound <b>1</b> in $\text{CDCl}_3$ (600MHz)                                | 11    |
| 10  | <b>Figure S10.</b> The NOESY Spectrum of Compound <b>1</b> in $\text{CDCl}_3$ (600MHz)                              | 12    |
| 11  | <b>Figure S11.</b> The X-ray Single Crystal Diffraction Data of Compound <b>1</b>                                   | 13,14 |
| 12  | <b>Figure S12.</b> The UV Spectrum of Compound <b>2</b> in MeOH                                                     | 15    |
| 13  | <b>Figure S13.</b> The CD Spectrum of Compound <b>2</b> in MeOH                                                     | 15    |
| 14  | <b>Figure S14.</b> The HR-mass Spectrum of Compound <b>2</b> in MeOH                                                | 16    |
| 15  | <b>Figure S15.</b> The IR Spectrum of Compound <b>2</b>                                                             | 16    |
| 16  | <b>Figure S16.</b> The $^1\text{H}$ NMR Spectrum of Compound <b>2</b> in $\text{MeOH-}d_4$ (500MHz)                 | 17    |
| 17  | <b>Figure S17.</b> The $^{13}\text{C}$ NMR Spectrum of Compound <b>2</b> in $\text{MeOH-}d_4$ (125MHz)              | 18    |
| 18  | <b>Figure S18.</b> The $^1\text{H}$ - $^1\text{H}$ COSY Spectrum of Compound <b>2</b> in $\text{MeOH-}d_4$ (500MHz) | 19    |
| 19  | <b>Figure S19.</b> The HSQC Spectrum of Compound <b>2</b> in $\text{MeOH-}d_4$ (500MHz)                             | 20    |
| 20  | <b>Figure S20.</b> The HMBC Spectrum of Compound <b>2</b> in $\text{MeOH-}d_4$ (500MHz)                             | 21    |
| 21  | <b>Figure S21.</b> The NOESY Spectrum of Compound <b>2</b> in $\text{MeOH-}d_4$ (500MHz)                            | 22    |
| 22  | <b>Figure S22.</b> The UV Spectrum of Compound <b>3</b> in MeOH                                                     | 23    |
| 23  | <b>Figure S23.</b> The CD Spectrum of Compound <b>3</b> in MeOH                                                     | 23    |
| 24  | <b>Figure S24.</b> The HR-mass Spectrum of Compound <b>3</b> in MeOH                                                | 23    |
| 25  | <b>Figure S25.</b> The $^1\text{H}$ NMR Spectrum of Compound <b>3</b> in $\text{MeOH-}d_4$ (500MHz)                 | 24    |
| 26  | <b>Figure S26.</b> The $^{13}\text{C}$ NMR Spectrum of Compound <b>3</b> in $\text{MeOH-}d_4$ (125MHz)              | 25    |
| 27  | <b>Figure S27.</b> The $^1\text{H}$ - $^1\text{H}$ COSY Spectrum of Compound <b>3</b> in $\text{MeOH-}d_4$ (500MHz) | 26    |
| 28  | <b>Figure S28.</b> The HSQC Spectrum of Compound <b>3</b> in $\text{MeOH-}d_4$ (500MHz)                             | 27    |
| 29  | <b>Figure S29.</b> The HMBC Spectrum of Compound <b>3</b> in $\text{MeOH-}d_4$ (500MHz)                             | 28    |
| 30  | <b>Figure S30.</b> The NOESY Spectrum of Compound <b>3</b> in $\text{MeOH-}d_4$ (500MHz)                            | 29    |
| 31  | <b>Figure S31.</b> The UV Spectrum of Compound <b>4</b> in MeOH                                                     | 30    |
| 32  | <b>Figure S32.</b> The CD Spectrum of Compound <b>4</b> in MeOH                                                     | 30    |
| 33  | <b>Figure S33.</b> The HR-mass Spectrum of Compound <b>4</b> in MeOH                                                | 31    |
| 34  | <b>Figure S34.</b> The IR Spectrum of Compound <b>4</b>                                                             | 31    |
| 35  | <b>Figure S35.</b> The $^1\text{H}$ NMR Spectrum of Compound <b>4</b> in $\text{CDCl}_3$ (500MHz)                   | 32    |
| 36  | <b>Figure S36.</b> The $^{13}\text{C}$ NMR Spectrum of Compound <b>4</b> in $\text{CDCl}_3$ (125MHz)                | 33    |
| 37  | <b>Figure S37.</b> The $^1\text{H}$ - $^1\text{H}$ COSY Spectrum of Compound <b>4</b> in $\text{CDCl}_3$ (500MHz)   | 34    |
| 38  | <b>Figure S38.</b> The HSQC Spectrum of Compound <b>4</b> in $\text{CDCl}_3$ (500MHz)                               | 35    |
| 39  | <b>Figure S39.</b> The HMBC Spectrum of Compound <b>4</b> in $\text{CDCl}_3$ (500MHz)                               | 36    |
| 40  | <b>Figure S40.</b> The NOESY Spectrum of Compound <b>4</b> in $\text{CDCl}_3$ (500MHz)                              | 37    |
| 41  | <b>Figure S41.</b> The UV Spectrum of Compound <b>5</b> in MeOH                                                     | 38    |
| 42  | <b>Figure S42.</b> The CD Spectrum of Compound <b>5</b> in MeOH                                                     | 38    |
| 43  | <b>Figure S43.</b> The HR-mass Spectrum of Compound <b>5</b> in MeOH                                                | 39    |

|    |                                                                                                                  |    |
|----|------------------------------------------------------------------------------------------------------------------|----|
| 44 | <b>Figure S44.</b> The IR Spectrum of Compound <b>5</b>                                                          | 40 |
| 45 | <b>Figure S45.</b> The $^1\text{H}$ NMR Spectrum of Compound <b>5</b> in $\text{MeOH-}d_4$ (600MHz)              | 41 |
| 46 | <b>Figure S46.</b> The $^{13}\text{C}$ NMR Spectrum of Compound <b>5</b> in $\text{MeOH-}d_4$ (150MHz)           | 42 |
| 47 | <b>Figure S47.</b> The $^1\text{H-}^1\text{H}$ COSY Spectrum of Compound <b>5</b> in $\text{MeOH-}d_4$ (600MHz)  | 43 |
| 48 | <b>Figure S48.</b> The HSQC Spectrum of Compound <b>5</b> in $\text{MeOH-}d_4$ (600MHz)                          | 44 |
| 49 | <b>Figure S49.</b> The HMBC Spectrum of Compound <b>5</b> in $\text{MeOH-}d_4$ (600MHz)                          | 45 |
| 50 | <b>Figure S50.</b> The NOESY Spectrum of Compound <b>5</b> in $\text{MeOH-}d_4$ (600MHz)                         | 46 |
| 51 | <b>Figure S51.</b> The UV Spectrum of Compound <b>7</b> in MeOH                                                  | 47 |
| 52 | <b>Figure S52.</b> The CD Spectrum of Compound <b>7</b> in MeOH                                                  | 47 |
| 53 | <b>Figure S53.</b> The HR-mass Spectrum of Compound <b>7</b> in MeOH                                             | 48 |
| 54 | <b>Figure S54.</b> The IR Spectrum of Compound <b>7</b>                                                          | 49 |
| 55 | <b>Figure S55.</b> The $^1\text{H}$ NMR Spectrum of Compound <b>7</b> in $\text{MeOH-}d_4$ (600MHz)              | 50 |
| 56 | <b>Figure S56.</b> The $^{13}\text{C}$ NMR Spectrum of Compound <b>7</b> in $\text{MeOH-}d_4$ (150MHz)           | 51 |
| 57 | <b>Figure S57.</b> The $^1\text{H-}^1\text{H}$ COSY Spectrum of Compound <b>7</b> in $\text{MeOH-}d_4$ (600MHz)  | 52 |
| 58 | <b>Figure S58.</b> The HSQC Spectrum of Compound <b>7</b> in $\text{MeOH-}d_4$ (600MHz)                          | 53 |
| 59 | <b>Figure S59.</b> The HMBC Spectrum of Compound <b>7</b> in $\text{MeOH-}d_4$ (600MHz)                          | 54 |
| 60 | <b>Figure S60.</b> The NOESY Spectrum of Compound <b>7</b> in $\text{MeOH-}d_4$ (600MHz)                         | 55 |
| 61 | <b>Figure S61.</b> The UV Spectrum of Compound <b>8</b> in MeOH                                                  | 56 |
| 62 | <b>Figure S62.</b> The CD Spectrum of Compound <b>8</b> in MeOH                                                  | 56 |
| 63 | <b>Figure S63.</b> The HR-mass Spectrum of Compound <b>8</b> in MeOH                                             | 57 |
| 64 | <b>Figure S64.</b> The IR Spectrum of Compound <b>8</b>                                                          | 58 |
| 65 | <b>Figure S65.</b> The $^1\text{H}$ NMR Spectrum of Compound <b>8</b> in $\text{MeOH-}d_4$ (600MHz)              | 59 |
| 66 | <b>Figure S66.</b> The $^{13}\text{C}$ NMR Spectrum of Compound <b>8</b> in $\text{MeOH-}d_4$ (150MHz)           | 60 |
| 67 | <b>Figure S67.</b> The $^1\text{H-}^1\text{H}$ COSY Spectrum of Compound <b>8</b> in $\text{MeOH-}d_4$ (600MHz)  | 61 |
| 68 | <b>Figure S68.</b> The HSQC Spectrum of Compound <b>8</b> in $\text{MeOH-}d_4$ (600MHz)                          | 62 |
| 69 | <b>Figure S69.</b> The HMBC Spectrum of Compound <b>8</b> in $\text{MeOH-}d_4$ (600MHz)                          | 63 |
| 70 | <b>Figure S70.</b> The NOESY Spectrum of Compound <b>8</b> in $\text{MeOH-}d_4$ (600MHz)                         | 64 |
| 71 | <b>Figure S71.</b> The UV Spectrum of Compound <b>9</b> in MeOH                                                  | 65 |
| 72 | <b>Figure S72.</b> The CD Spectrum of Compound <b>9</b> in MeOH                                                  | 65 |
| 73 | <b>Figure S73.</b> The HR-mass Spectrum of Compound <b>9</b> in MeOH                                             | 66 |
| 74 | <b>Figure S74.</b> The IR Spectrum of Compound <b>9</b>                                                          | 67 |
| 75 | <b>Figure S75.</b> The $^1\text{H}$ NMR Spectrum of Compound <b>9</b> in $\text{MeOH-}d_4$ (600MHz)              | 68 |
| 76 | <b>Figure S76.</b> The $^{13}\text{C}$ NMR Spectrum of Compound <b>9</b> in $\text{MeOH-}d_4$ (150MHz)           | 69 |
| 77 | <b>Figure S77.</b> The $^1\text{H-}^1\text{H}$ COSY Spectrum of Compound <b>9</b> in $\text{MeOH-}d_4$ (600MHz)  | 70 |
| 78 | <b>Figure S78.</b> The HSQC Spectrum of Compound <b>9</b> in $\text{MeOH-}d_4$ (600MHz)                          | 71 |
| 79 | <b>Figure S79.</b> The HMBC Spectrum of Compound <b>9</b> in $\text{MeOH-}d_4$ (600MHz)                          | 72 |
| 80 | <b>Figure S80.</b> The NOESY Spectrum of Compound <b>9</b> in $\text{MeOH-}d_4$ (600MHz)                         | 73 |
| 81 | <b>Figure S81.</b> The UV Spectrum of Compound <b>10</b> in MeOH                                                 | 74 |
| 82 | <b>Figure S82.</b> The CD Spectrum of Compound <b>10</b> in MeOH                                                 | 74 |
| 83 | <b>Figure S83.</b> The HR-mass Spectrum of Compound <b>10</b> in MeOH                                            | 75 |
| 84 | <b>Figure S84.</b> The IR Spectrum of Compound <b>10</b>                                                         | 76 |
| 85 | <b>Figure S85.</b> The $^1\text{H}$ NMR Spectrum of Compound <b>10</b> in $\text{MeOH-}d_4$ (600MHz)             | 77 |
| 86 | <b>Figure S86.</b> The $^{13}\text{C}$ NMR Spectrum of Compound <b>10</b> in $\text{MeOH-}d_4$ (150MHz)          | 78 |
| 87 | <b>Figure S87.</b> The $^1\text{H-}^1\text{H}$ COSY Spectrum of Compound <b>10</b> in $\text{MeOH-}d_4$ (600MHz) | 79 |
| 88 | <b>Figure S88.</b> The HSQC Spectrum of Compound <b>10</b> in $\text{MeOH-}d_4$ (600MHz)                         | 80 |
| 89 | <b>Figure S89.</b> The HMBC Spectrum of Compound <b>10</b> in $\text{MeOH-}d_4$ (600MHz)                         | 81 |

|     |                                                                                                                                                                                                                 |     |
|-----|-----------------------------------------------------------------------------------------------------------------------------------------------------------------------------------------------------------------|-----|
| 90  | <b>Figure S90.</b> The NOESY Spectrum of Compound <b>10</b> in MeOH- <i>d</i> <sub>4</sub> (600MHz)                                                                                                             | 82  |
| 91  | <b>Figure S91.</b> The UV Spectrum of Compound <b>11</b> in MeOH                                                                                                                                                | 83  |
| 92  | <b>Figure S92.</b> The CD Spectrum of Compound <b>11</b> in MeOH                                                                                                                                                | 83  |
| 93  | <b>Figure S93.</b> The HR-mass Spectrum of Compound <b>11</b> in MeOH                                                                                                                                           | 84  |
| 94  | <b>Figure S94.</b> The IR Spectrum of Compound <b>11</b>                                                                                                                                                        | 84  |
| 95  | <b>Figure S95.</b> The <sup>1</sup> H NMR Spectrum of Compound <b>11</b> in MeOH- <i>d</i> <sub>4</sub> (500MHz)                                                                                                | 85  |
| 96  | <b>Figure S96.</b> The <sup>13</sup> C NMR Spectrum of Compound <b>11</b> in MeOH- <i>d</i> <sub>4</sub> (125MHz)                                                                                               | 86  |
| 97  | <b>Figure S97.</b> The <sup>1</sup> H- <sup>1</sup> H COSY Spectrum of Compound <b>11</b> in MeOH- <i>d</i> <sub>4</sub> (500MHz)                                                                               | 87  |
| 98  | <b>Figure S98.</b> The HSQC Spectrum of Compound <b>11</b> in MeOH- <i>d</i> <sub>4</sub> (500MHz)                                                                                                              | 88  |
| 99  | <b>Figure S109.</b> The HMBC Spectrum of Compound <b>11</b> in MeOH- <i>d</i> <sub>4</sub> (500MHz)                                                                                                             | 89  |
| 100 | <b>Figure S100.</b> The NOESY Spectrum of Compound <b>11</b> in MeOH- <i>d</i> <sub>4</sub> (500MHz)                                                                                                            | 90  |
| 101 | <b>Figure S101.</b> The UV Spectrum of Compound <b>12</b> in MeOH                                                                                                                                               | 91  |
| 102 | <b>Figure S102.</b> The CD Spectrum of Compound <b>12</b> in MeOH                                                                                                                                               | 91  |
| 103 | <b>Figure S103.</b> The HR-mass Spectrum of Compound <b>12</b> in MeOH                                                                                                                                          | 92  |
| 104 | <b>Figure S104.</b> The IR Spectrum of Compound <b>12</b>                                                                                                                                                       | 92  |
| 105 | <b>Figure S105.</b> The <sup>1</sup> H NMR Spectrum of Compound <b>12</b> in MeOH- <i>d</i> <sub>4</sub> (500MHz)                                                                                               | 93  |
| 106 | <b>Figure S106.</b> The <sup>13</sup> C NMR Spectrum of Compound <b>12</b> in MeOH- <i>d</i> <sub>4</sub> (125MHz)                                                                                              | 94  |
| 107 | <b>Figure S107.</b> The <sup>1</sup> H- <sup>1</sup> H COSY Spectrum of Compound <b>12</b> in MeOH- <i>d</i> <sub>4</sub> (500MHz)                                                                              | 95  |
| 108 | <b>Figure S108.</b> The HSQC Spectrum of Compound <b>12</b> in MeOH- <i>d</i> <sub>4</sub> (500MHz)                                                                                                             | 96  |
| 109 | <b>Figure S109.</b> The HMBC Spectrum of Compound <b>12</b> in MeOH- <i>d</i> <sub>4</sub> (500MHz)                                                                                                             | 97  |
| 110 | <b>Figure S110.</b> The NOESY Spectrum of Compound <b>12</b> in MeOH- <i>d</i> <sub>4</sub> (500MHz)                                                                                                            | 98  |
| 111 | <b>Figure S111.</b> The UV Spectrum of Compound <b>26</b> in MeOH                                                                                                                                               | 99  |
| 112 | <b>Figure S112.</b> The CD Spectrum of Compound <b>26</b> in MeOH                                                                                                                                               | 99  |
| 113 | <b>Figure S113.</b> The HR-mass Spectrum of Compound <b>26</b> in MeOH                                                                                                                                          | 100 |
| 114 | <b>Figure S114.</b> The IR Spectrum of Compound <b>26</b>                                                                                                                                                       | 100 |
| 115 | <b>Figure S115.</b> The <sup>1</sup> H NMR Spectrum of Compound <b>26</b> in CDCl <sub>3</sub> (600MHz)                                                                                                         | 101 |
| 116 | <b>Figure S116.</b> The <sup>13</sup> C NMR Spectrum of Compound <b>26</b> in CDCl <sub>3</sub> (150MHz)                                                                                                        | 102 |
| 117 | <b>Figure S117.</b> The DEPT Spectrum of Compound <b>26</b> in CDCl <sub>3</sub> (150MHz)                                                                                                                       | 103 |
| 118 | <b>Figure S118.</b> The <sup>1</sup> H- <sup>1</sup> H COSY Spectrum of Compound <b>26</b> in CDCl <sub>3</sub> (600MHz))                                                                                       | 104 |
| 119 | <b>Figure S119.</b> The HSQC Spectrum of Compound <b>26</b> in CDCl <sub>3</sub> (600MHz)                                                                                                                       | 105 |
| 120 | <b>Figure S120.</b> The HMBC Spectrum of Compound <b>26</b> in CDCl <sub>3</sub> (600MHz)                                                                                                                       | 106 |
| 121 | <b>Figure S121.</b> The NOESY Spectrum of Compound <b>26</b> in CDCl <sub>3</sub> (600MHz)                                                                                                                      | 107 |
| 122 | <i>In silico</i> prediction of ECD Spectrum                                                                                                                                                                     | 108 |
| 123 | <b>Figure S122.</b> Low-energy Conformers of <b>1-5</b> in MeOH                                                                                                                                                 | 109 |
| 124 | <b>Figure S123.</b> Low-energy Conformers of <b>7-12</b> in MeOH                                                                                                                                                | 109 |
| 125 | <b>Figure S124.</b> Low-energy Conformers of <b>26</b> in MeOH                                                                                                                                                  | 110 |
| 126 | <b>Table S1.</b> Relative Energies, Equilibrium Populations, Extracted heats and weighting factors of the optimized conformers of <b>1-5,7-12</b> , and <b>26</b> at B3LYP/6-311+G (d,p) level in MeOH with PCM | 110 |
| 127 | <b>Figure S125.</b> Experimental and calculated ECD data of compounds <b>2-5</b> and <b>26</b>                                                                                                                  | 111 |
| 128 | <b>General Experimental Procedures</b>                                                                                                                                                                          | 112 |
| 129 | <b>Table S2.</b> The Inhibitory Activity of Fractions A-J Against hCEs                                                                                                                                          | 113 |
| 130 | <b>Table S3.</b> IC <sub>50</sub> Values of <b>1, 6, 10, 11, 13–15, 18–20, 22</b> , and <b>24–26</b> on hCES2A1                                                                                                 | 113 |
| 131 | <b>Table S4.</b> IC <sub>50</sub> Values of <b>18–26</b> on hCES1A1                                                                                                                                             | 113 |



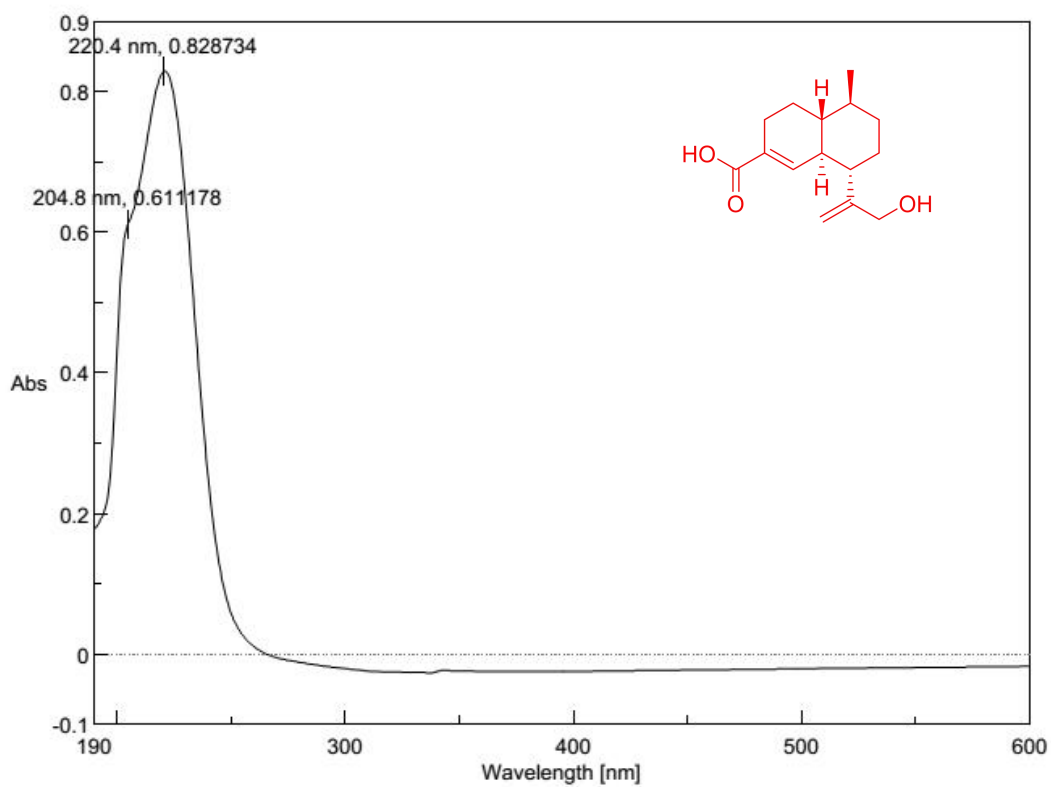

**Figure S1. The UV Spectrum of Compound 1 in MeOH**

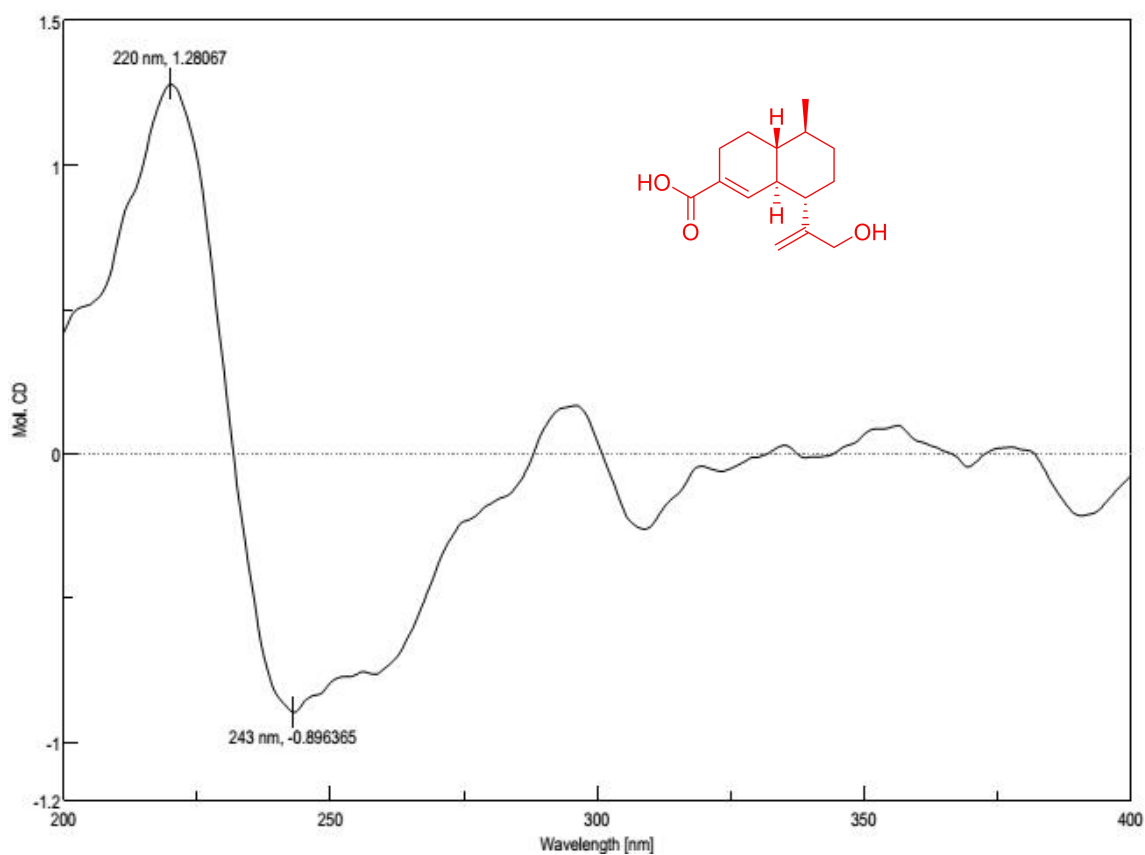

**Figure S2. The CD Spectrum of Compound 1 in MeOH**

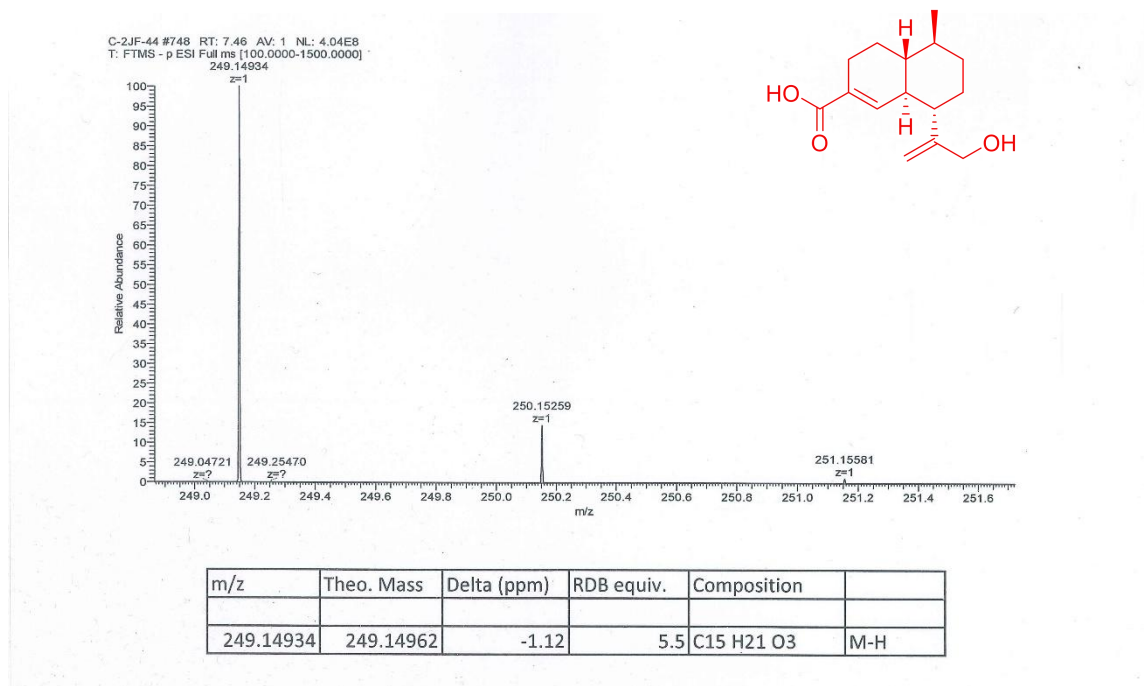

**Figure S3. The HR-mass Spectrum of Compound 1 in MeOH**

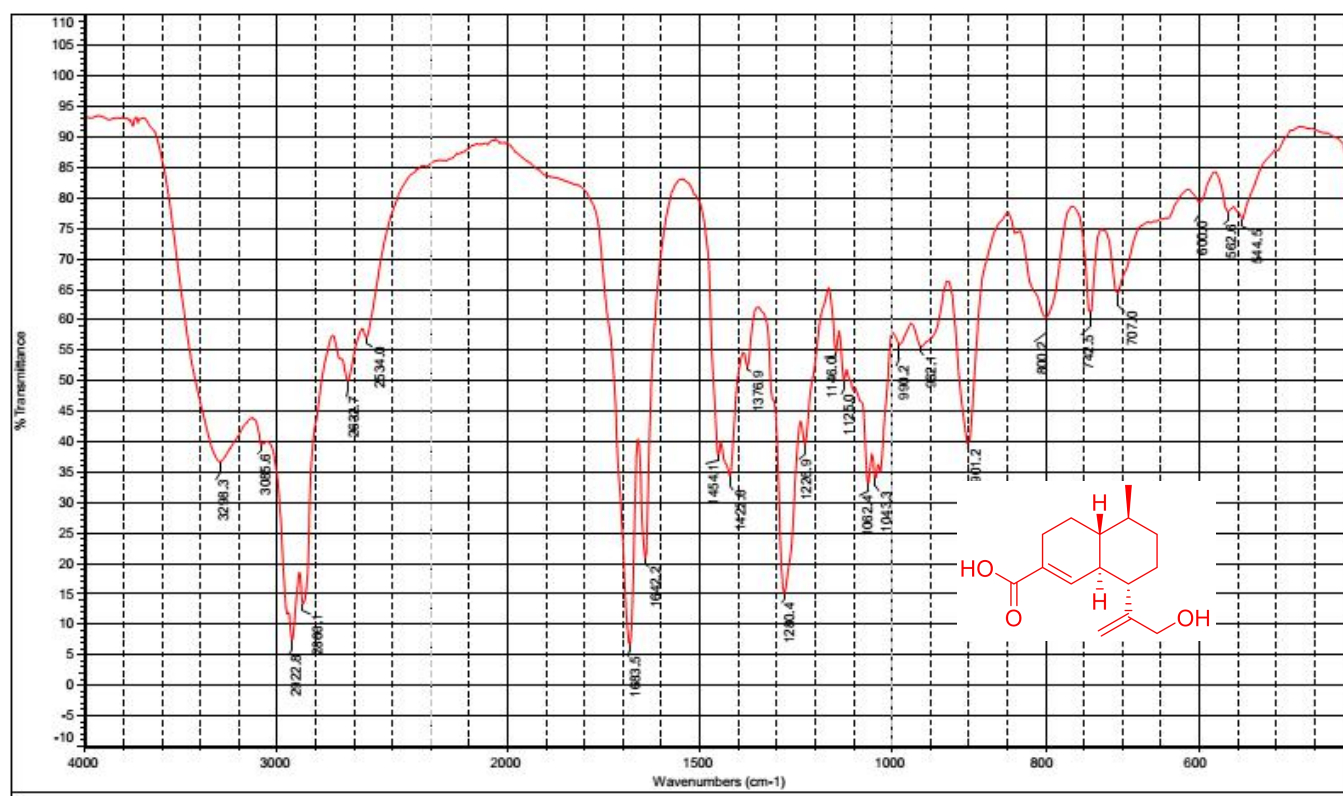

**Figure S4. The IR Spectrum of Compound 1**

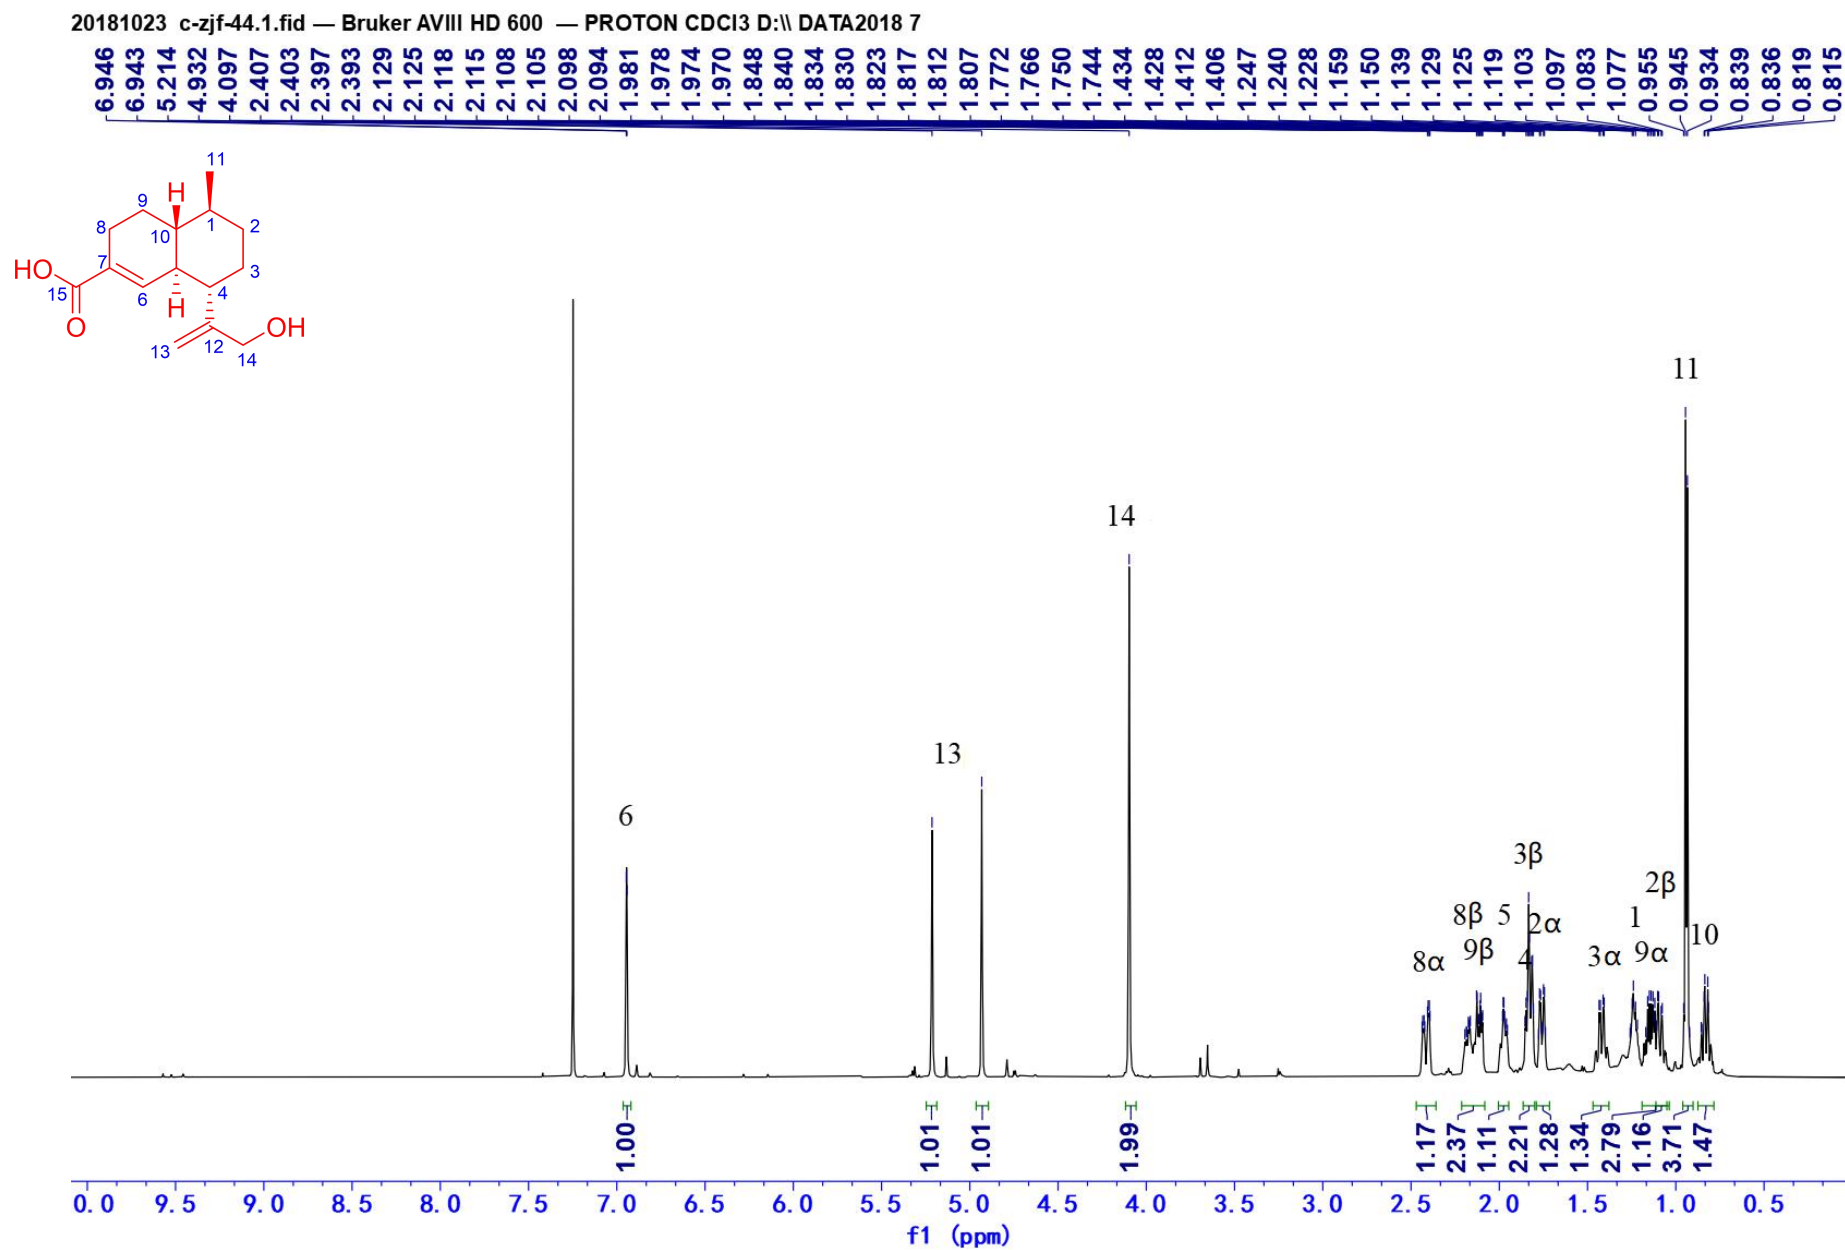

Figure S5. The  $^1\text{H}$  NMR Spectrum of Compound 1 in  $\text{CDCl}_3$  (600MHz)

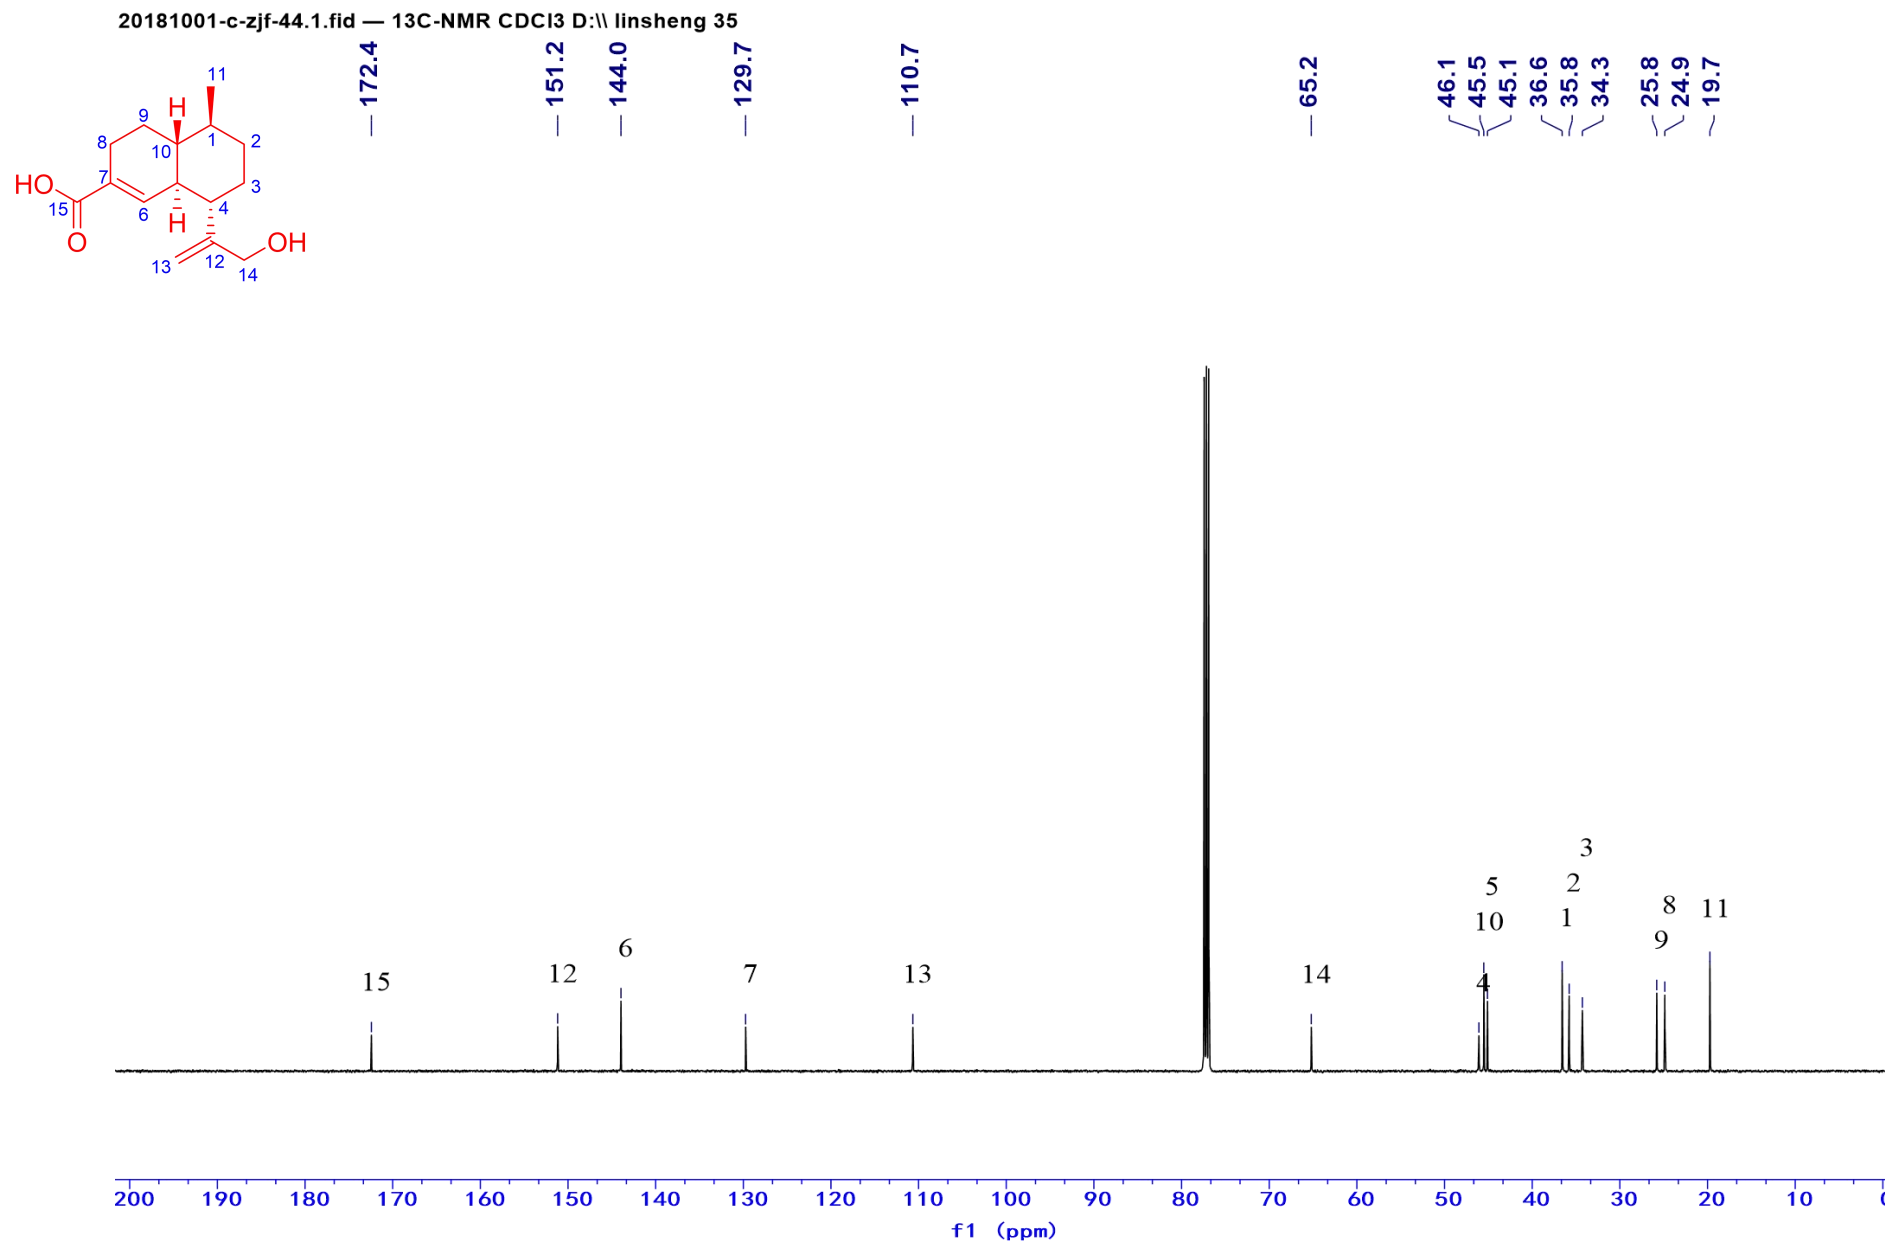

Figure S6. The <sup>13</sup>C NMR Spectrum of Compound 1 in CDCl<sub>3</sub> (150MHz)

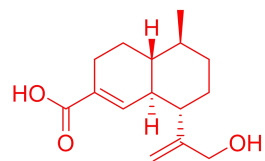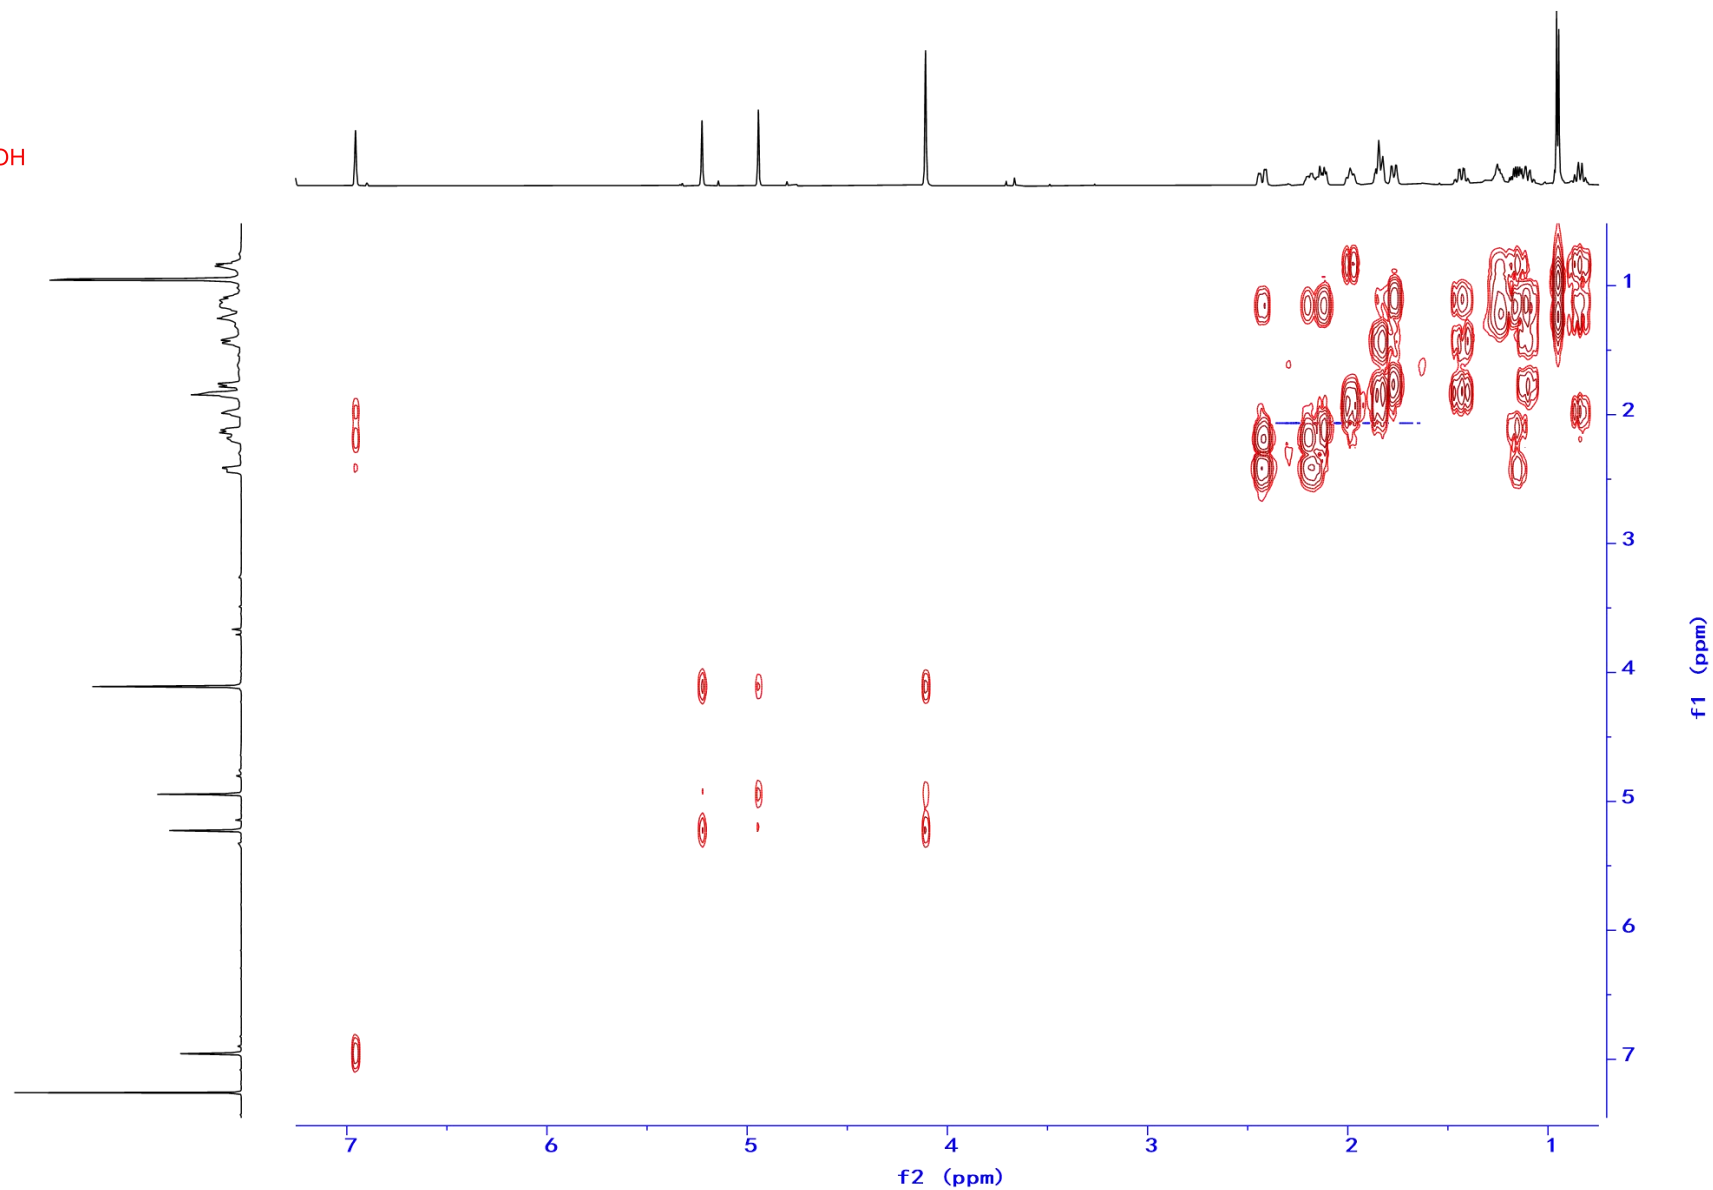

**Figure S7. The  $^1\text{H}$ - $^1\text{H}$  COSY Spectrum of Compound 1 in  $\text{CDCl}_3$  (600MHz)**

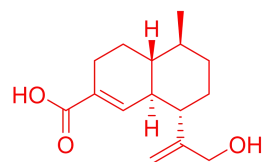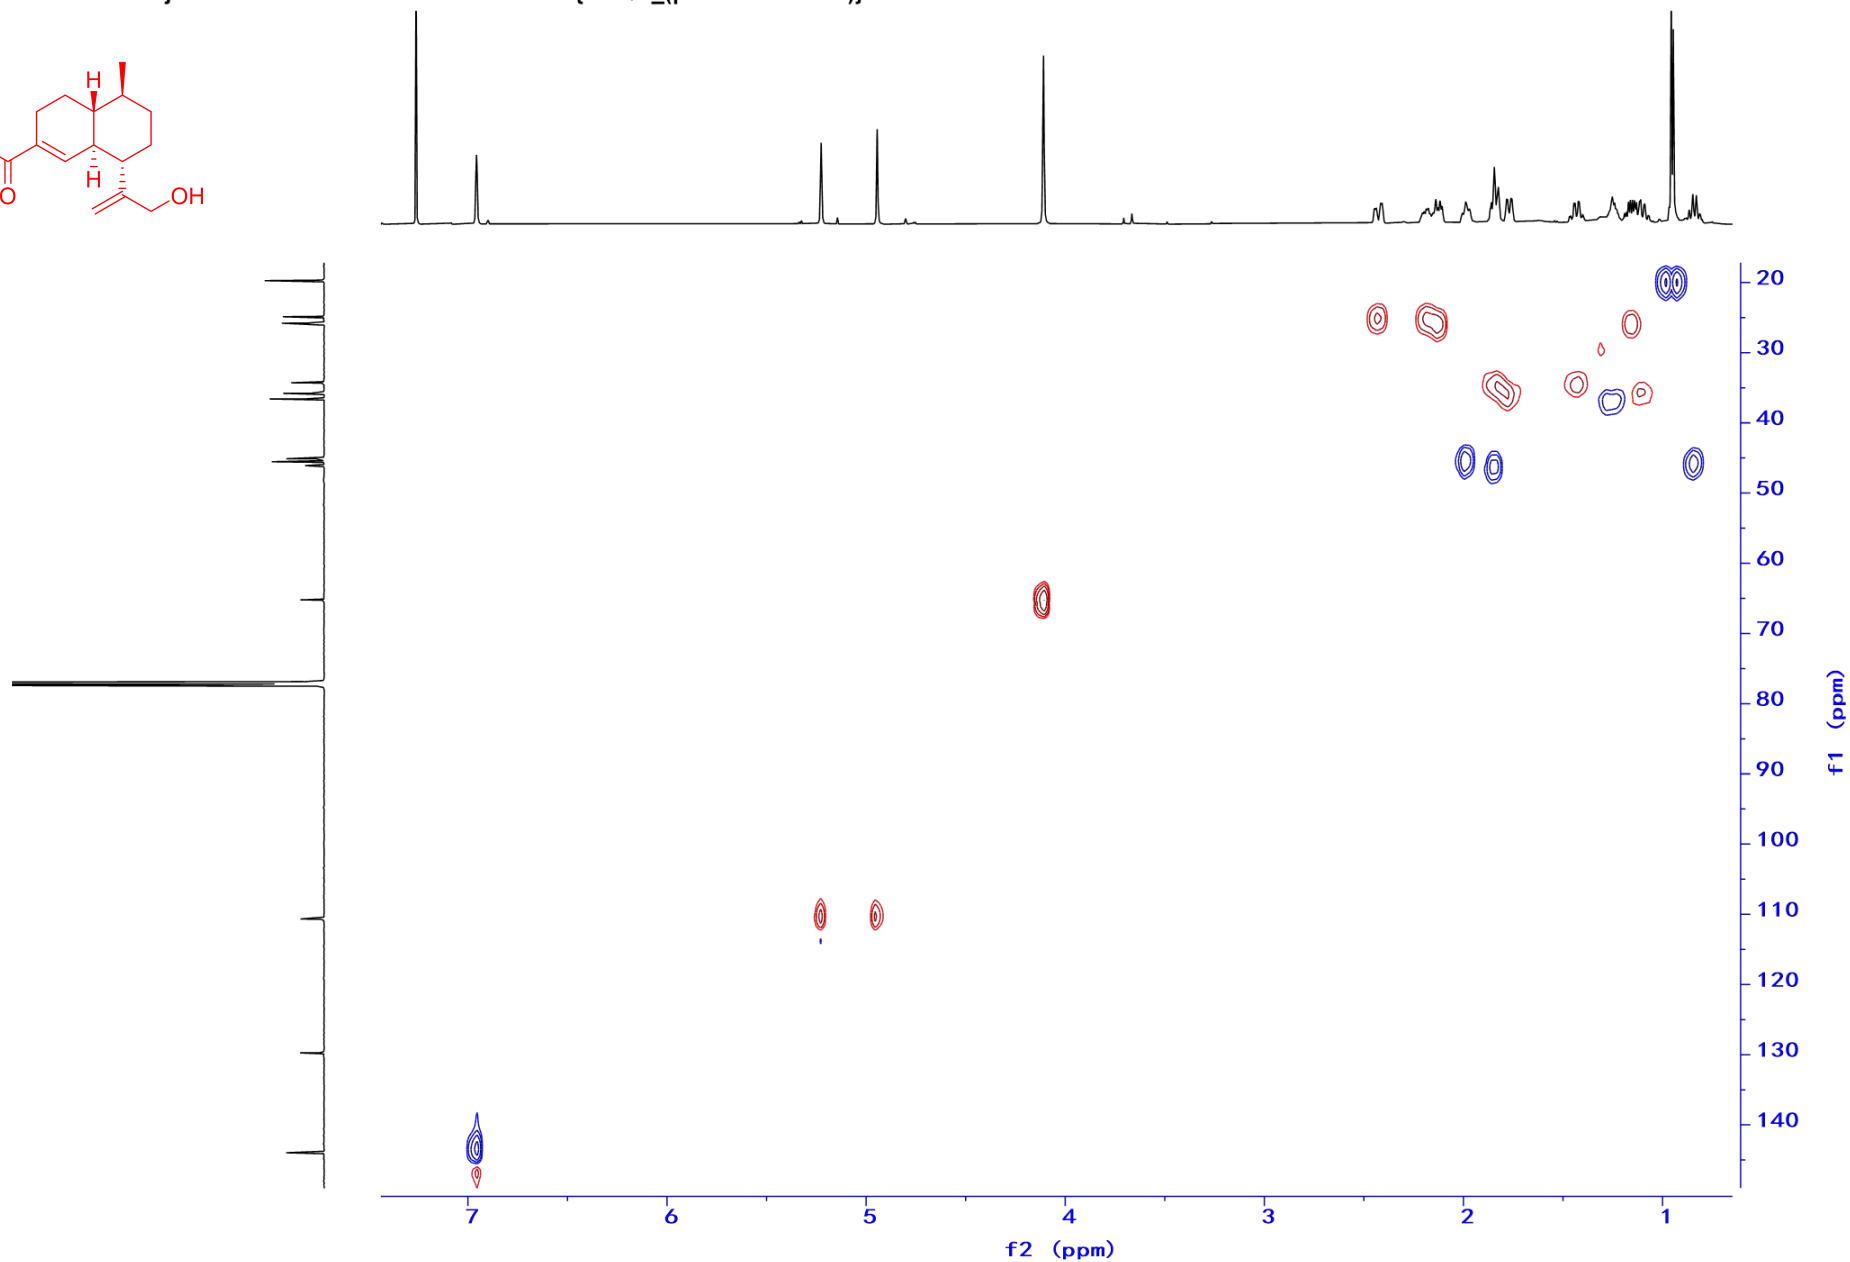

**Figure S8. The HSQC Spectrum of Compound 1 in CDCl<sub>3</sub> (600MHz)**

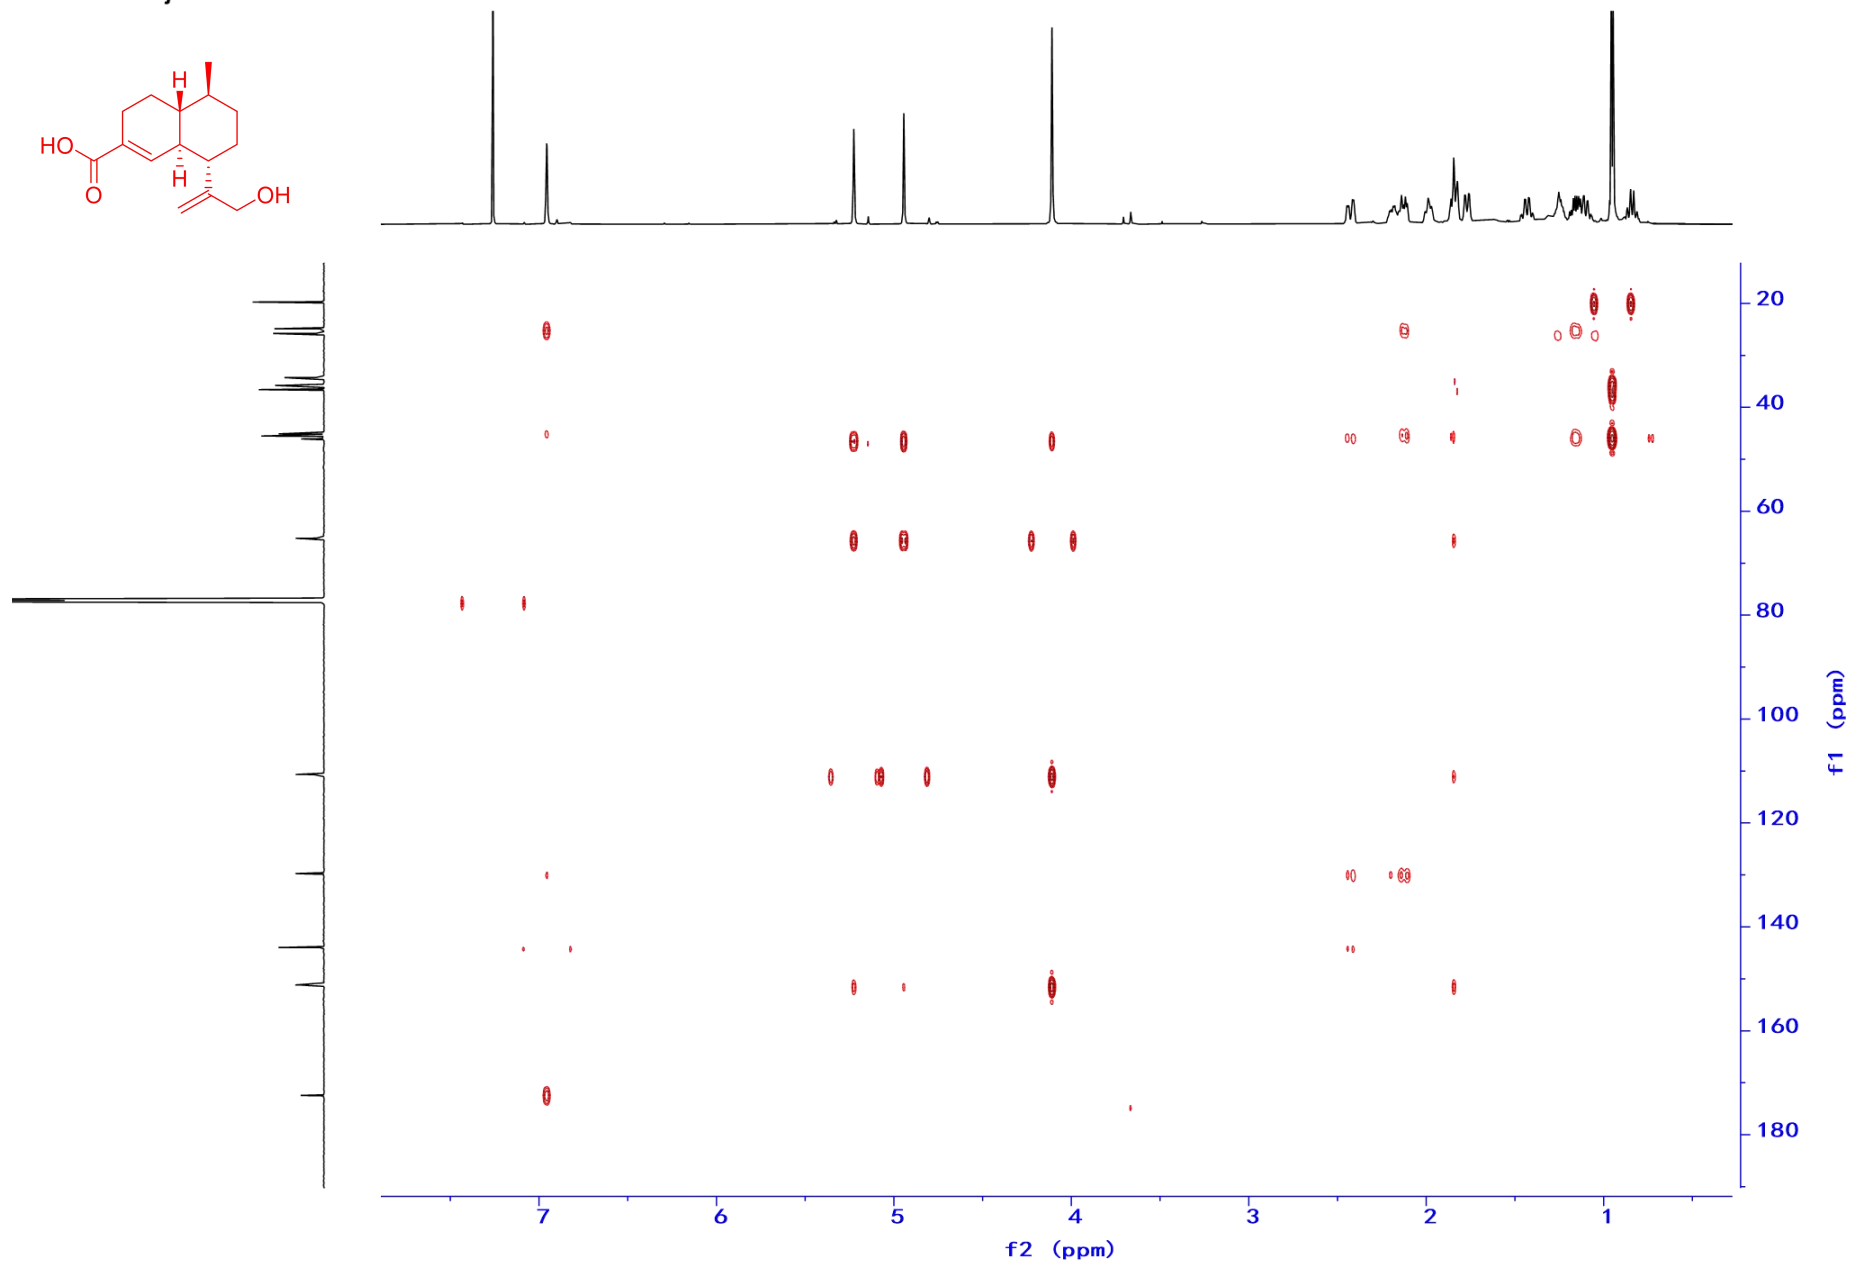

**Figure S9. The HMBC Spectrum of Compound 1 in CDCl<sub>3</sub> (600MHz)**

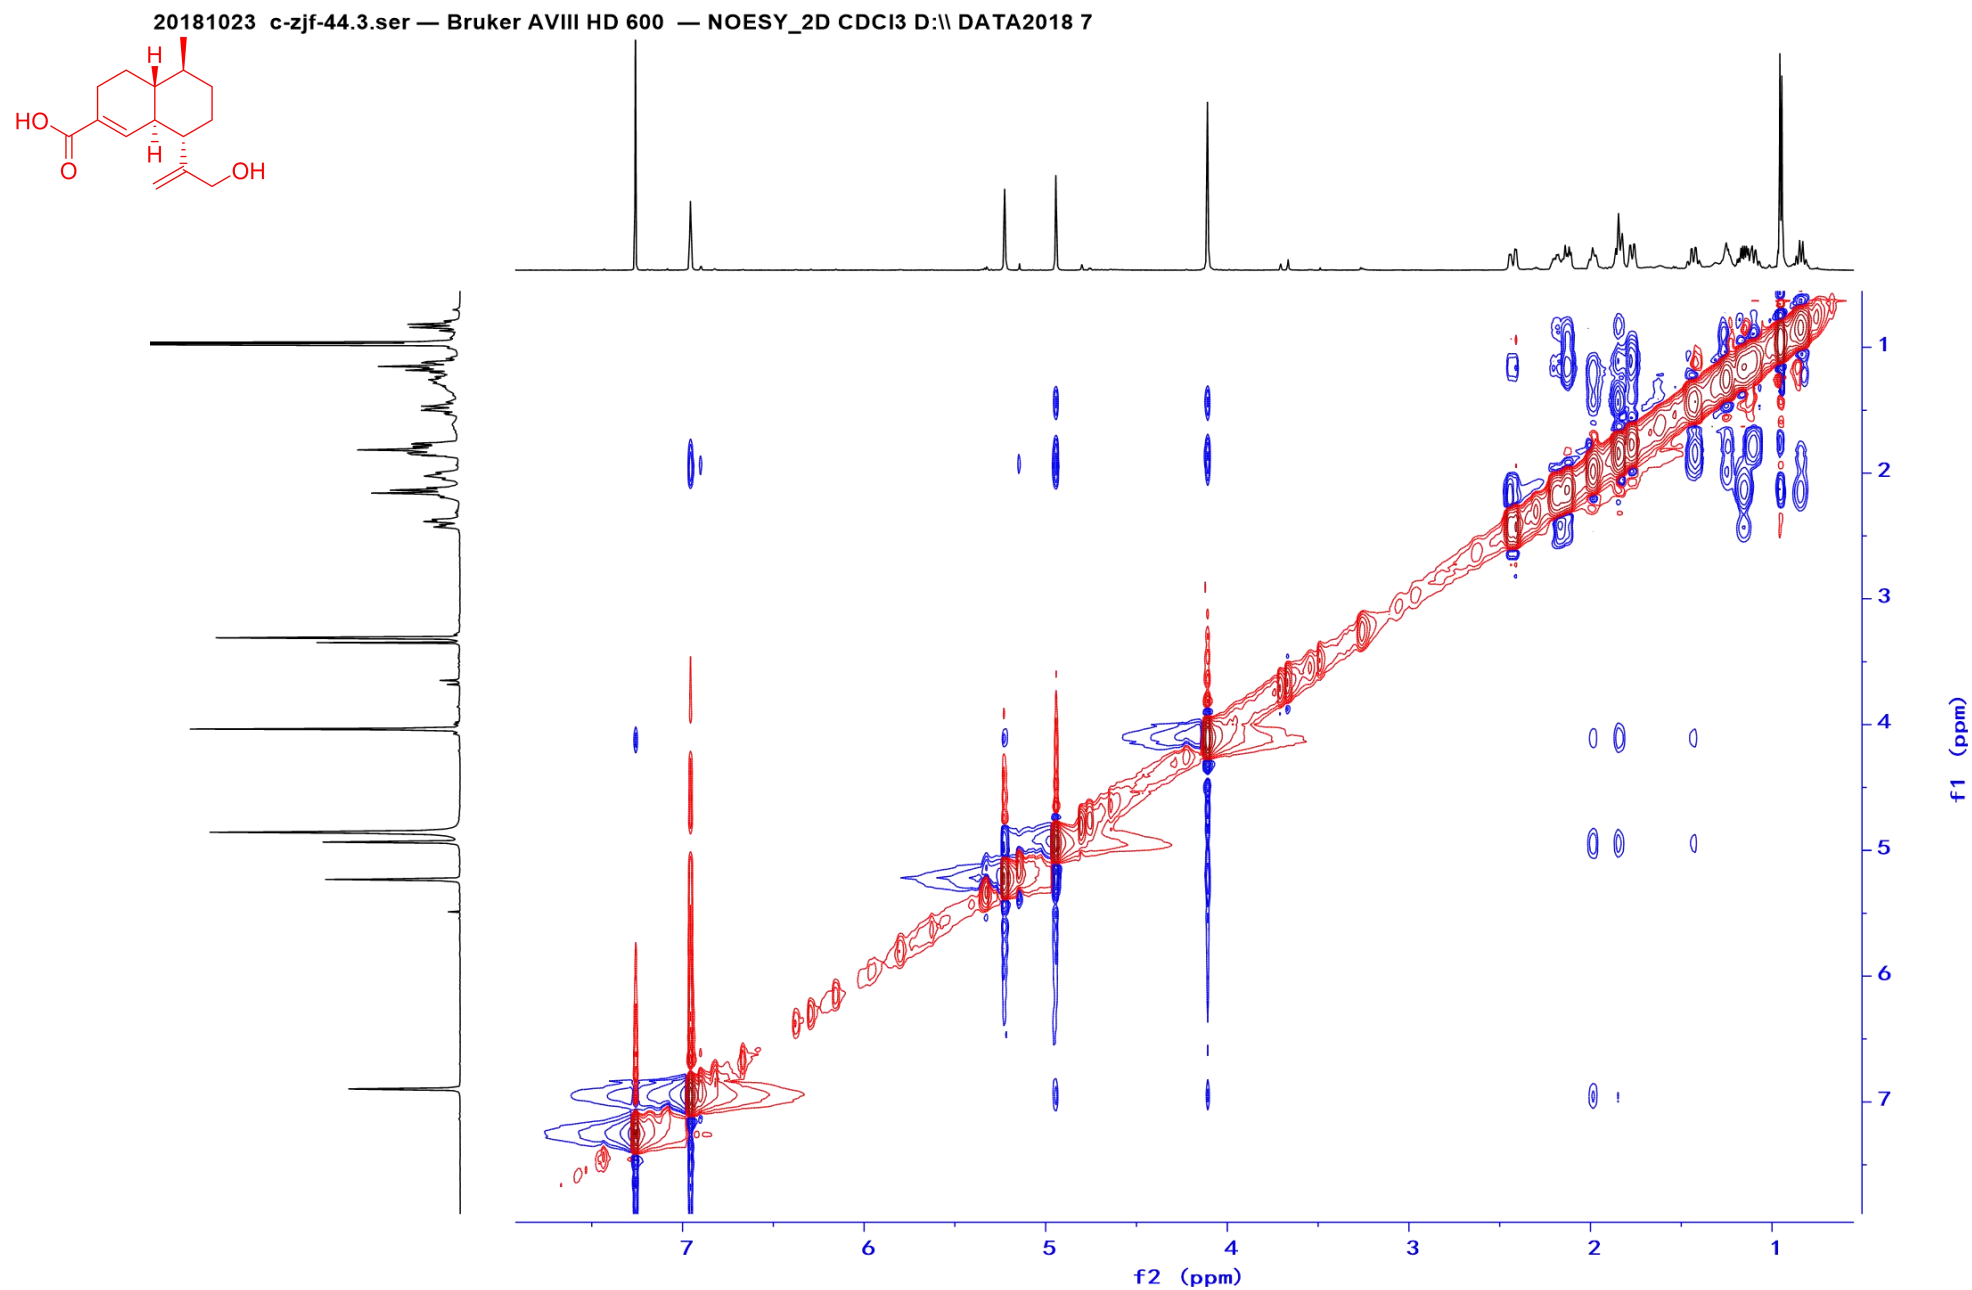

**Figure S10.** The NOESY Spectrum of Compound 1 in  $\text{CDCl}_3$  (600MHz)



Table 1. Crystal data and structure refinement for mj19144.

|                                   |                                                   |                              |
|-----------------------------------|---------------------------------------------------|------------------------------|
| Identification code               | mj19144                                           |                              |
| Empirical formula                 | C <sub>15</sub> H <sub>22</sub> O <sub>3</sub>    |                              |
| Formula weight                    | 250.32                                            |                              |
| Temperature                       | 170.02 K                                          |                              |
| Wavelength                        | 1.34139 Å                                         |                              |
| Crystal system                    | Triclinic                                         |                              |
| Space group                       | P1                                                |                              |
| Unit cell dimensions              | a = 8.6358(13) Å                                  | $\alpha = 74.596(6)^\circ$ . |
|                                   | b = 9.3834(15) Å                                  | $\beta = 86.938(9)^\circ$ .  |
|                                   | c = 9.8633(15) Å                                  | $\gamma = 68.597(9)^\circ$ . |
| Volume                            | 716.6(2) Å <sup>3</sup>                           |                              |
| Z                                 | 2                                                 |                              |
| Density (calculated)              | 1.160 Mg/m <sup>3</sup>                           |                              |
| Absorption coefficient            | 0.408 mm <sup>-1</sup>                            |                              |
| F(000)                            | 272                                               |                              |
| Crystal size                      | 0.12 x 0.03 x 0.02 mm <sup>3</sup>                |                              |
| Theta range for data collection   | 4.049 to 55.232°.                                 |                              |
| Index ranges                      | -10 ≤ h ≤ 10, -11 ≤ k ≤ 11, -12 ≤ l ≤ 11          |                              |
| Reflections collected             | 16803                                             |                              |
| Independent reflections           | 5215 [R(int) = 0.0529]                            |                              |
| Completeness to theta = 53.594°   | 99.6 %                                            |                              |
| Absorption correction             | Semi-empirical from equivalents                   |                              |
| Max. and min. transmission        | 0.7508 and 0.5594                                 |                              |
| Refinement method                 | Full-matrix-block least-squares on F <sup>2</sup> |                              |
| Data / restraints / parameters    | 5215 / 7 / 339                                    |                              |
| Goodness-of-fit on F <sup>2</sup> | 1.053                                             |                              |
| Final R indices [I > 2σ(I)]       | R1 = 0.0666, wR2 = 0.1808                         |                              |
| R indices (all data)              | R1 = 0.0724, wR2 = 0.1881                         |                              |
| Absolute structure parameter      | 0.00(19)                                          |                              |
| Extinction coefficient            | n/a                                               |                              |
| Largest diff. peak and hole       | 0.444 and -0.296 e.Å <sup>-3</sup>                |                              |

Table 2. Atomic coordinates ( $\times 10^4$ ) and equivalent isotropic displacement parameters ( $\text{\AA}^2 \times 10^3$ ) for mj19144.  $U(\text{eq})$  is defined as one third of the trace of the orthogonalized  $U^{\text{ij}}$  tensor.

|        | x        | y         | z       | U(eq) |
|--------|----------|-----------|---------|-------|
| O(1)   | 16079(5) | -7715(4)  | 1634(3) | 66    |
| O(2)   | 15370(5) | -6265(4)  | 3165(3) | 64    |
| O(3)   | 16252(4) | -6109(3)  | 8946(3) | 56    |
| C(1)   | 19051(5) | -13240(5) | 7439(5) | 49    |
| C(2)   | 19727(6) | -12802(5) | 8607(5) | 50    |
| C(3)   | 18424(5) | -11425(5) | 9057(4) | 48    |
| C(4)   | 17770(5) | -9955(4)  | 7811(4) | 39    |
| C(5)   | 17066(4) | -10367(4) | 6627(4) | 38    |
| C(6)   | 16405(4) | -8962(4)  | 5361(4) | 38    |
| C(7)   | 16485(5) | -9065(5)  | 4035(4) | 39    |
| C(8)   | 17218(5) | -10621(5) | 3655(4) | 46    |
| C(9)   | 17621(5) | -12048(5) | 4944(5) | 47    |
| C(10)  | 18384(5) | -11772(5) | 6187(4) | 41    |
| C(11)  | 20398(7) | -14634(6) | 7036(6) | 66    |
| C(12)  | 16543(5) | -8552(5)  | 8283(4) | 41    |
| C(13)  | 15017(5) | -8430(6)  | 8619(5) | 52    |
| C(14)  | 17287(6) | -7363(5)  | 8386(4) | 48    |
| C(15)  | 15949(5) | -7631(5)  | 2834(4) | 45    |
| O(1A)  | 14046(4) | -2171(4)  | 8369(3) | 53    |
| O(2A)  | 14427(4) | -3727(4)  | 6940(3) | 55    |
| O(3A)  | 15198(4) | -3777(3)  | 1074(3) | 52    |
| C(1A)  | 10045(5) | 2977(5)   | 2583(4) | 44    |
| C(2A)  | 10753(6) | 2860(5)   | 1141(4) | 51    |
| C(3A)  | 11268(5) | 1206(5)   | 949(4)  | 46    |
| C(4A)  | 12498(5) | -63(4)    | 2128(4) | 38    |
| C(5A)  | 11697(4) | 65(4)     | 3554(4) | 37    |
| C(6A)  | 12697(5) | -1229(4)  | 4793(4) | 38    |
| C(7A)  | 12851(5) | -1003(4)  | 6042(4) | 39    |
| C(8A)  | 12058(5) | 585(5)    | 6352(4) | 44    |
| C(9A)  | 10710(5) | 1741(4)   | 5248(4) | 41    |
| C(10A) | 11302(4) | 1721(4)   | 3750(4) | 37    |
| C(11A) | 9548(7)  | 4661(5)   | 2733(6) | 62    |
| C(12A) | 12988(5) | -1693(5)  | 1869(4) | 43    |
| C(11A) | 9548(7)  | 4661(5)   | 2733(6) | 62    |
| C(12A) | 12988(5) | -1693(5)  | 1869(4) | 43    |
| C(13A) | 11938(6) | -2408(6)  | 1861(5) | 56    |
| C(14A) | 14786(5) | -2382(5)  | 1544(4) | 47    |
| C(15A) | 13843(5) | -2363(5)  | 7223(4) | 40    |

**Figure S11. X-ray single crystal diffraction data of compound 1**

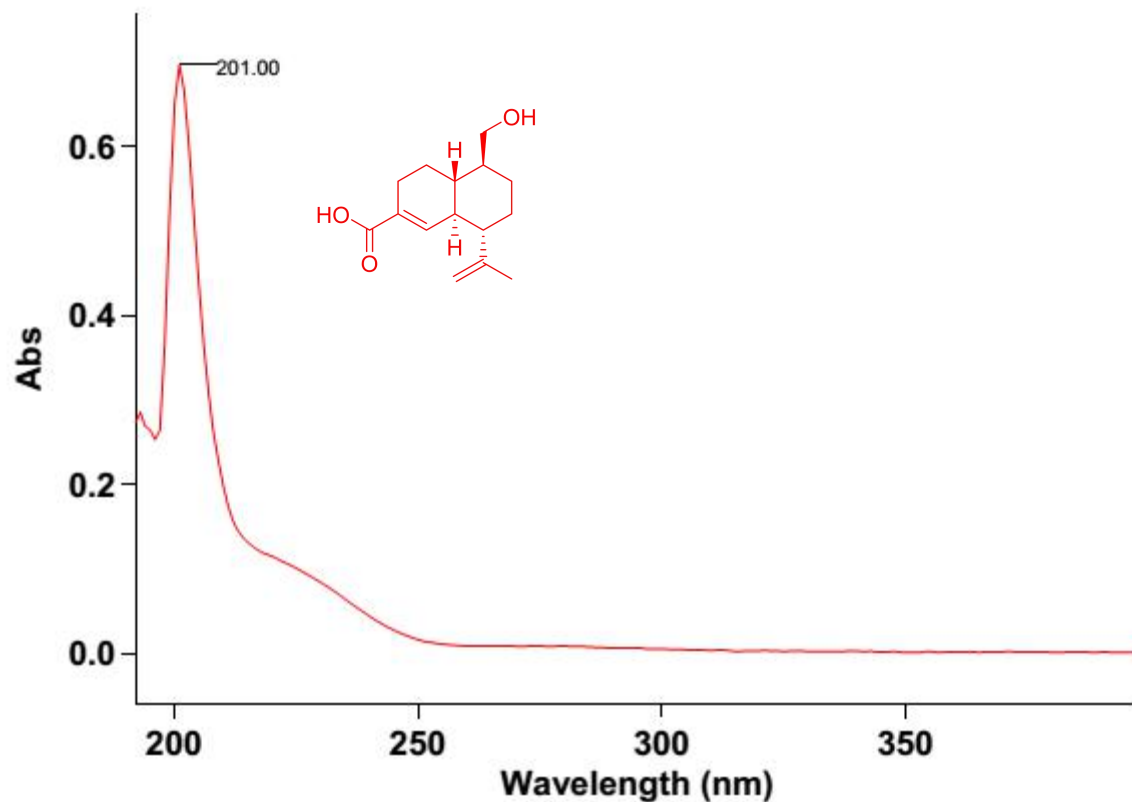

**Figure S12. The UV Spectrum of compound 2 in MeOH**

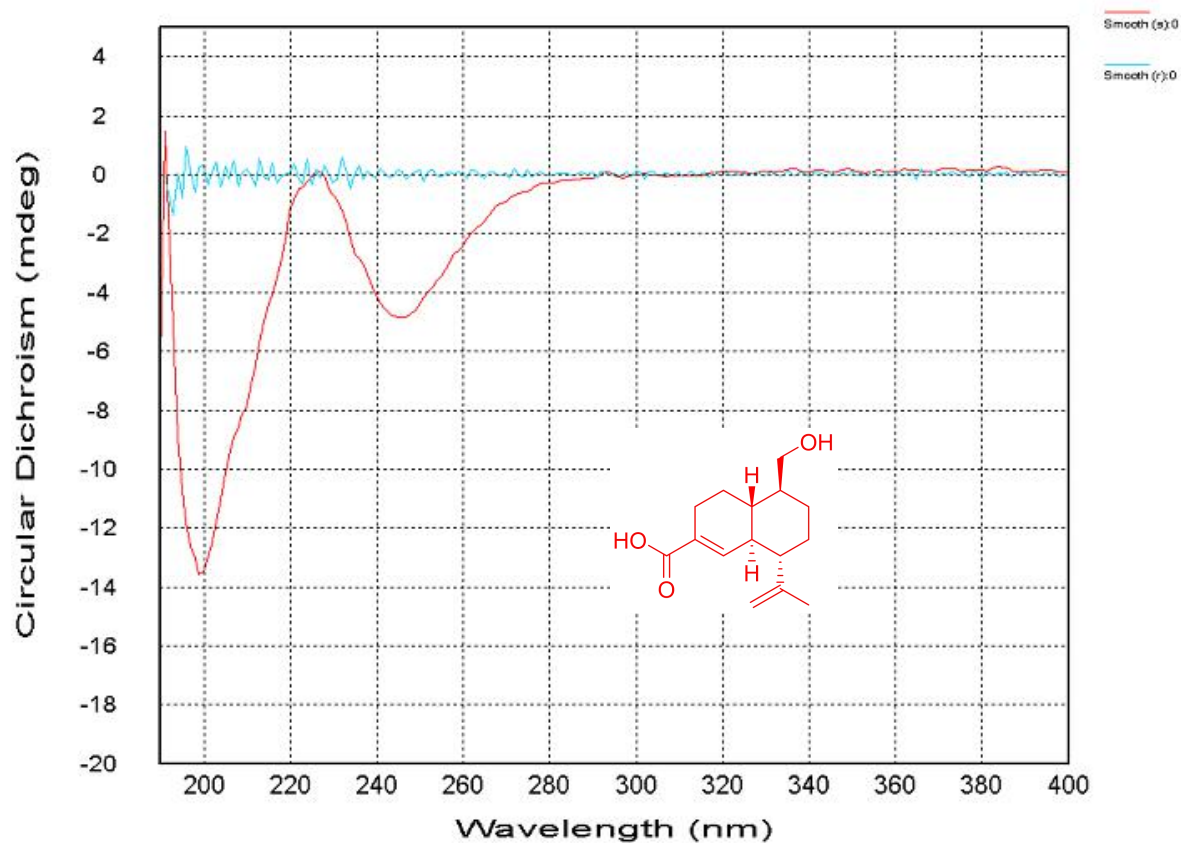

**Figure S13. The CD Spectrum of compound 2 in**

# High resolution compound report

Compound NO:C-ZJF-11

Method:20190108-ZJF-NEG

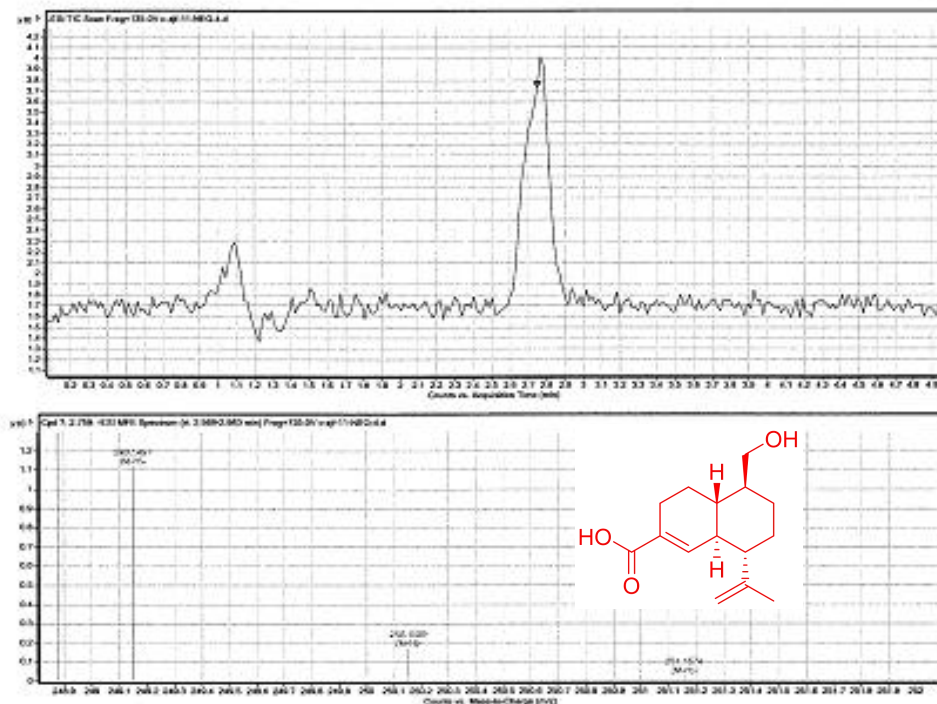

MeOH

Figure S14. The HR-mass Spectrum of Compound 2 in MeOH

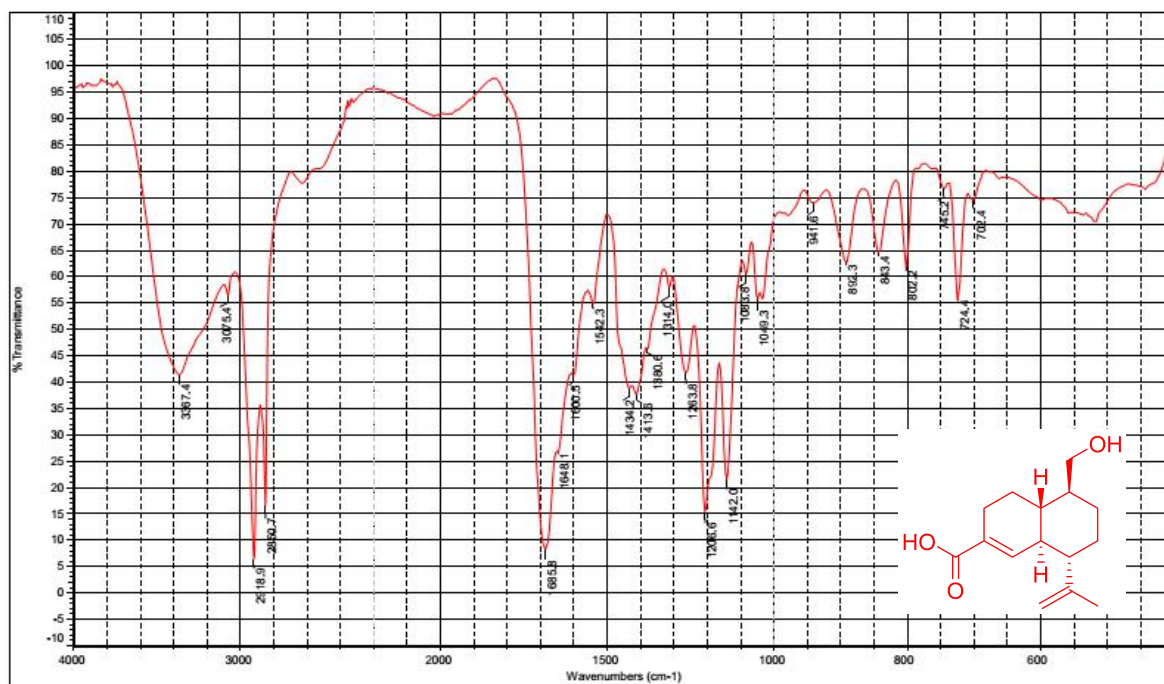

Figure S15. The IR Spectrum of Compound 2

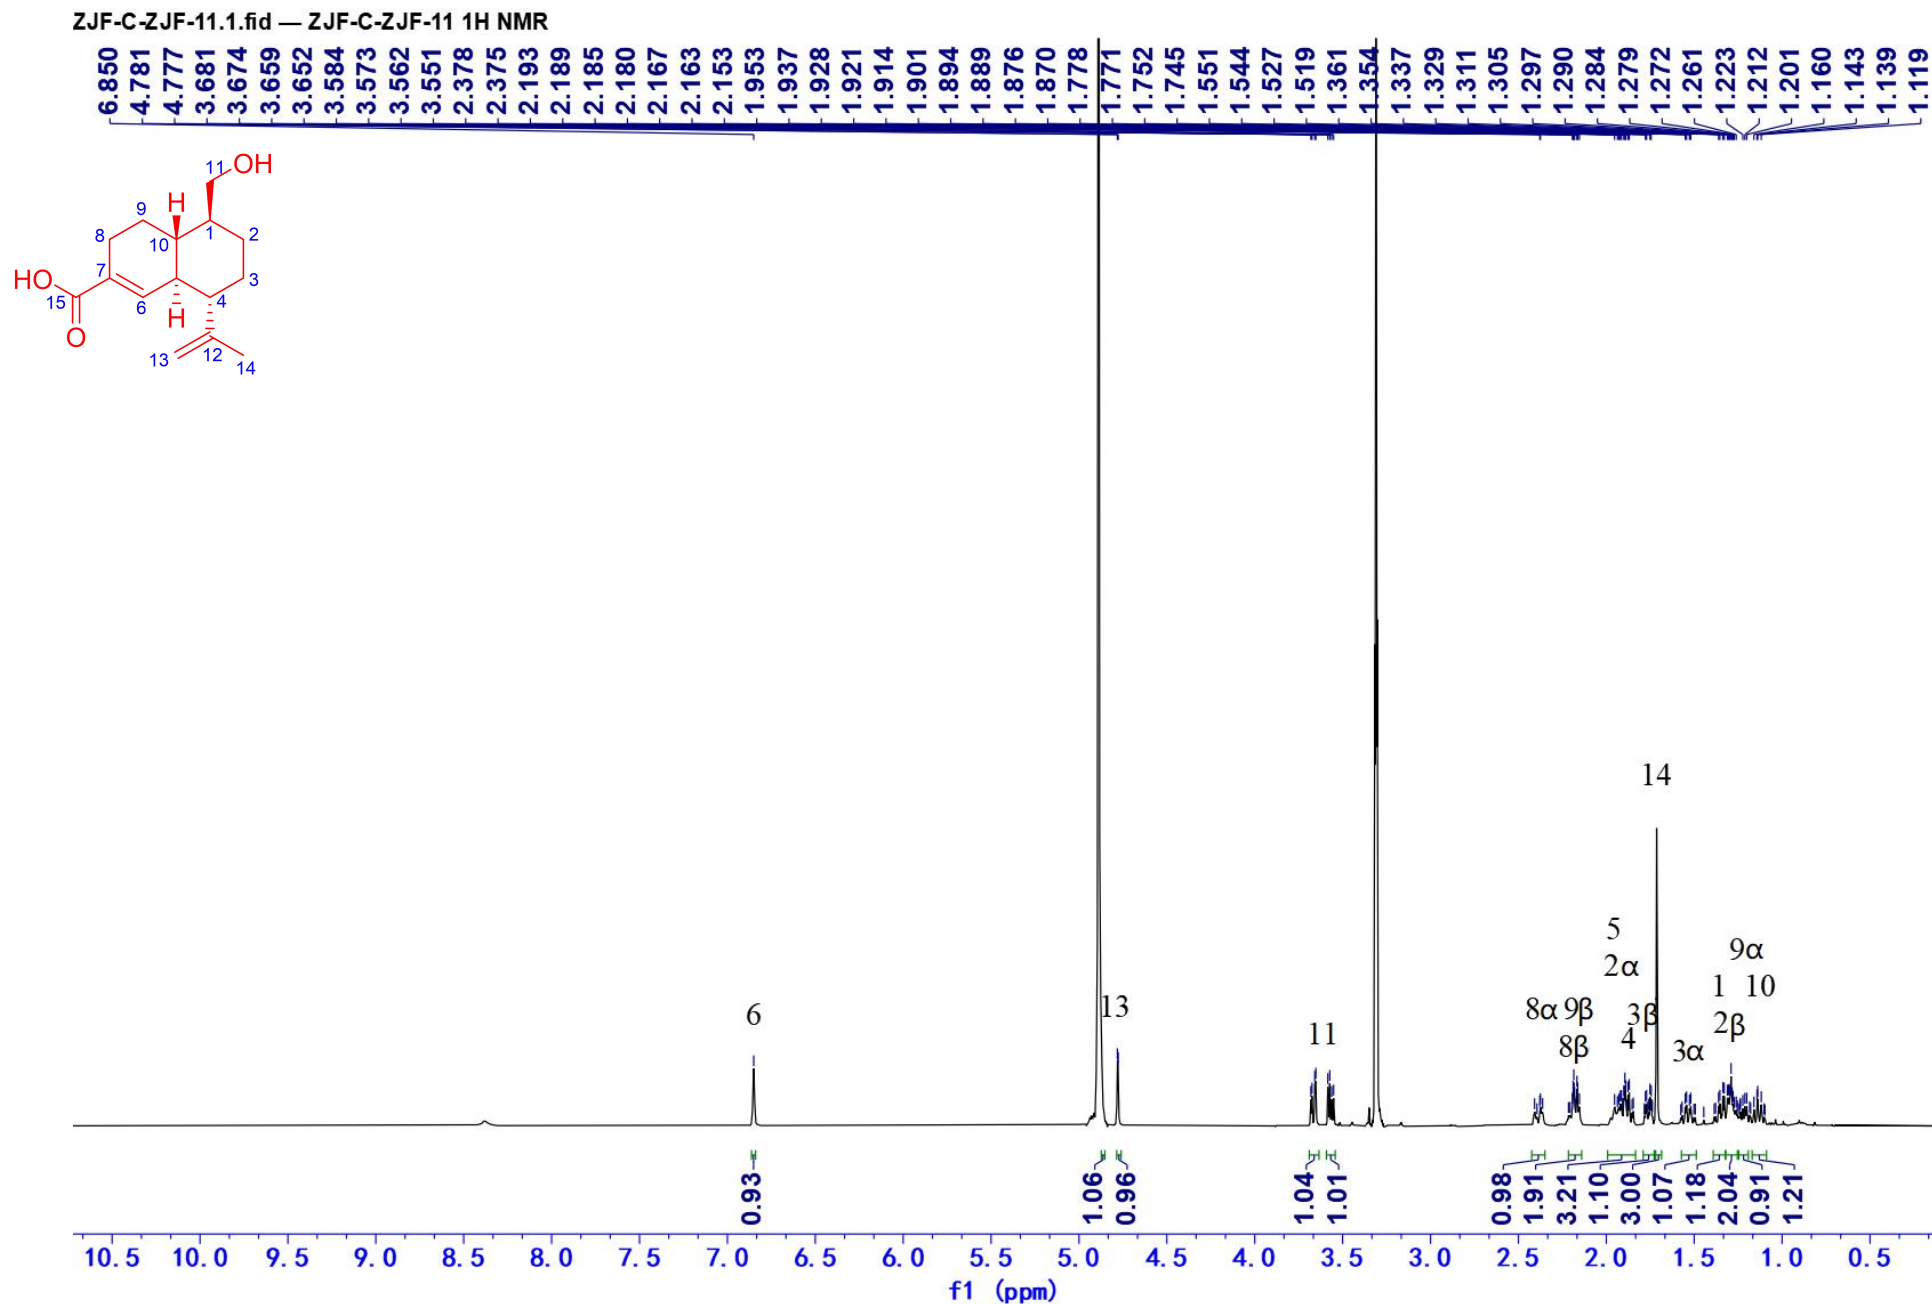

Figure S16. The <sup>1</sup>H NMR Spectrum of Compound 2 in MeOH-*d*<sub>4</sub> (500MHz)

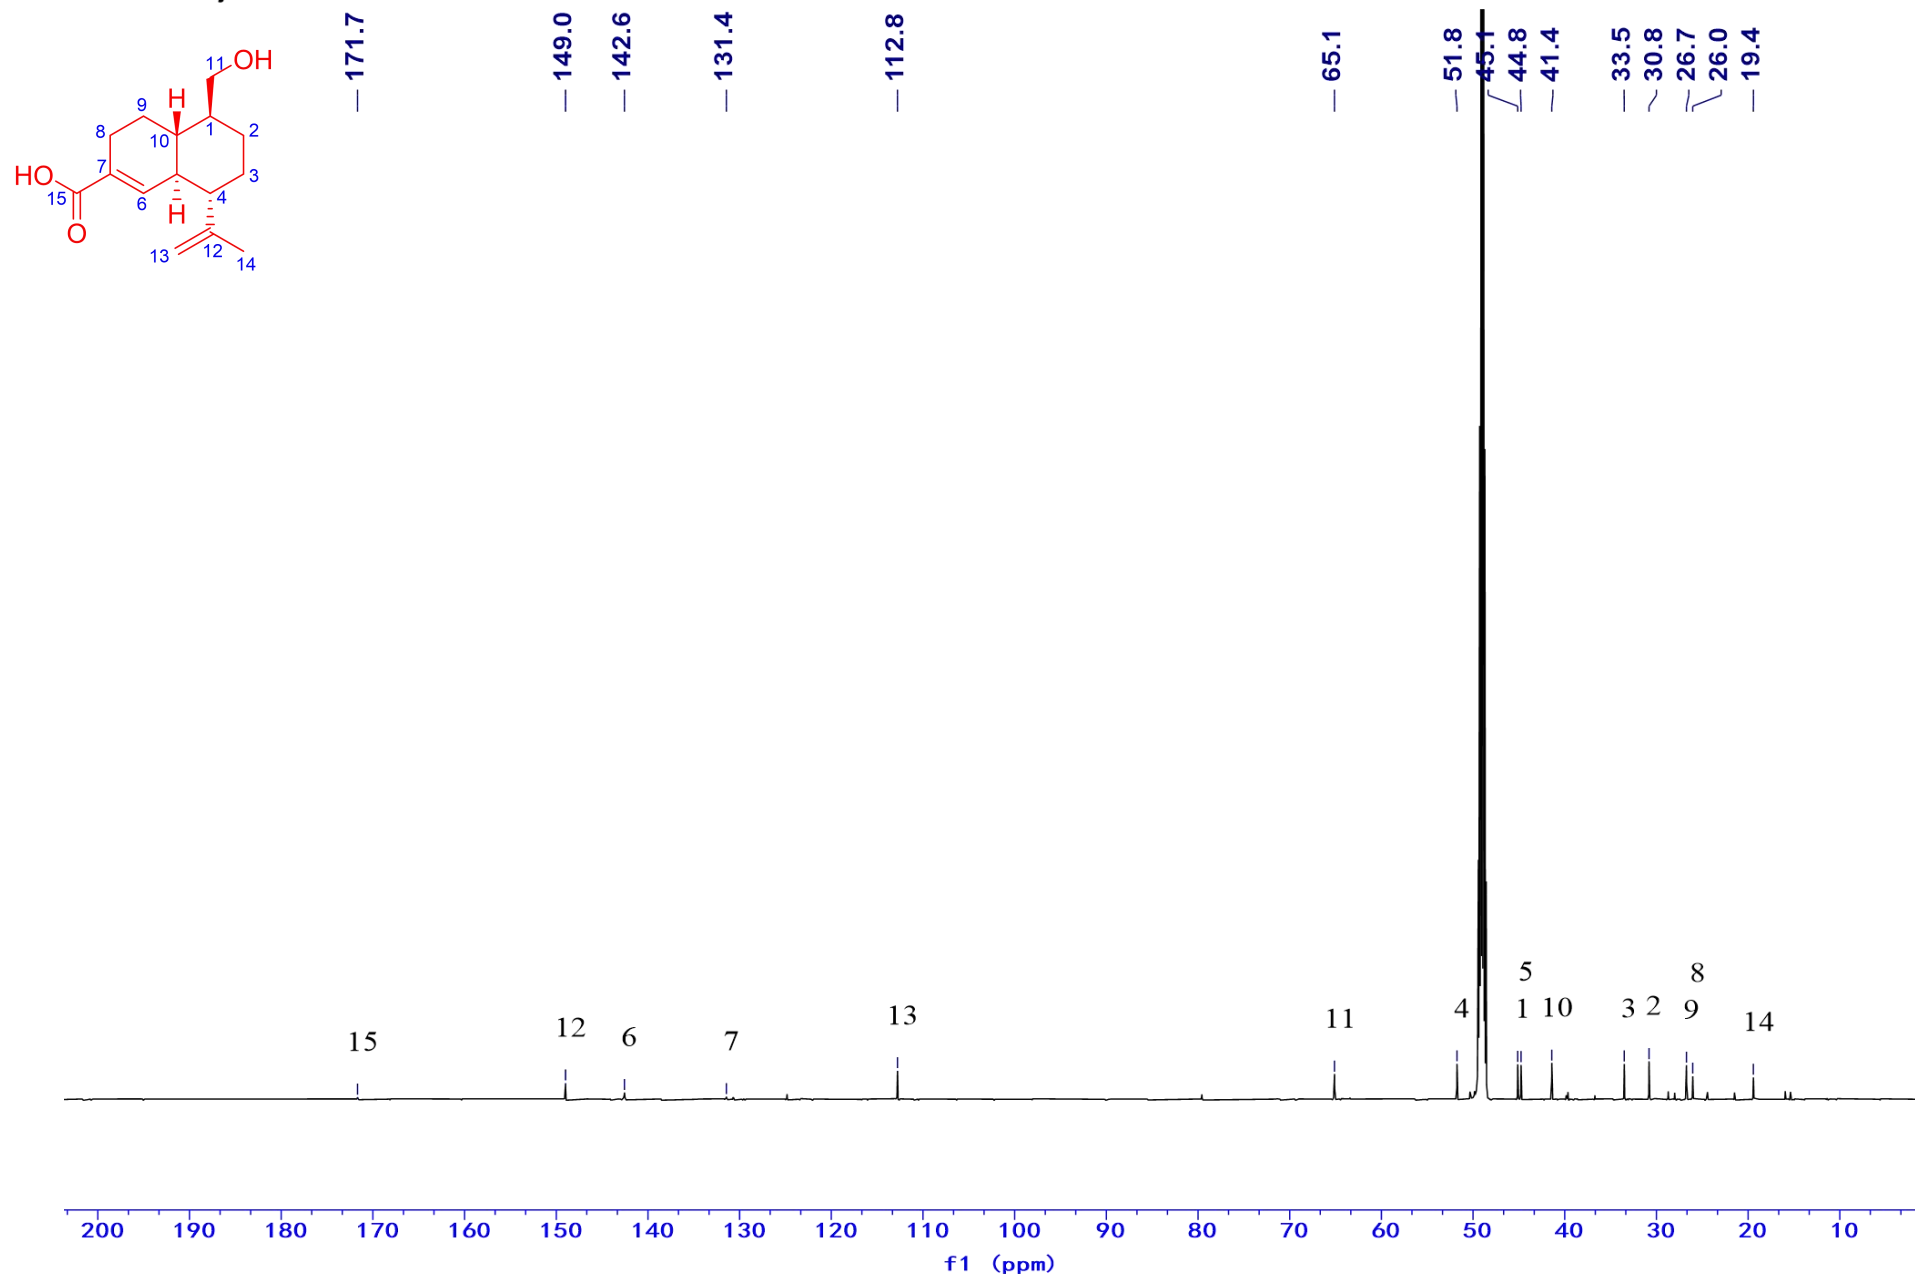

Figure S17. The <sup>13</sup>C NMR Spectrum of Compound 2 in MeOH-*d*<sub>4</sub> (125MHz)

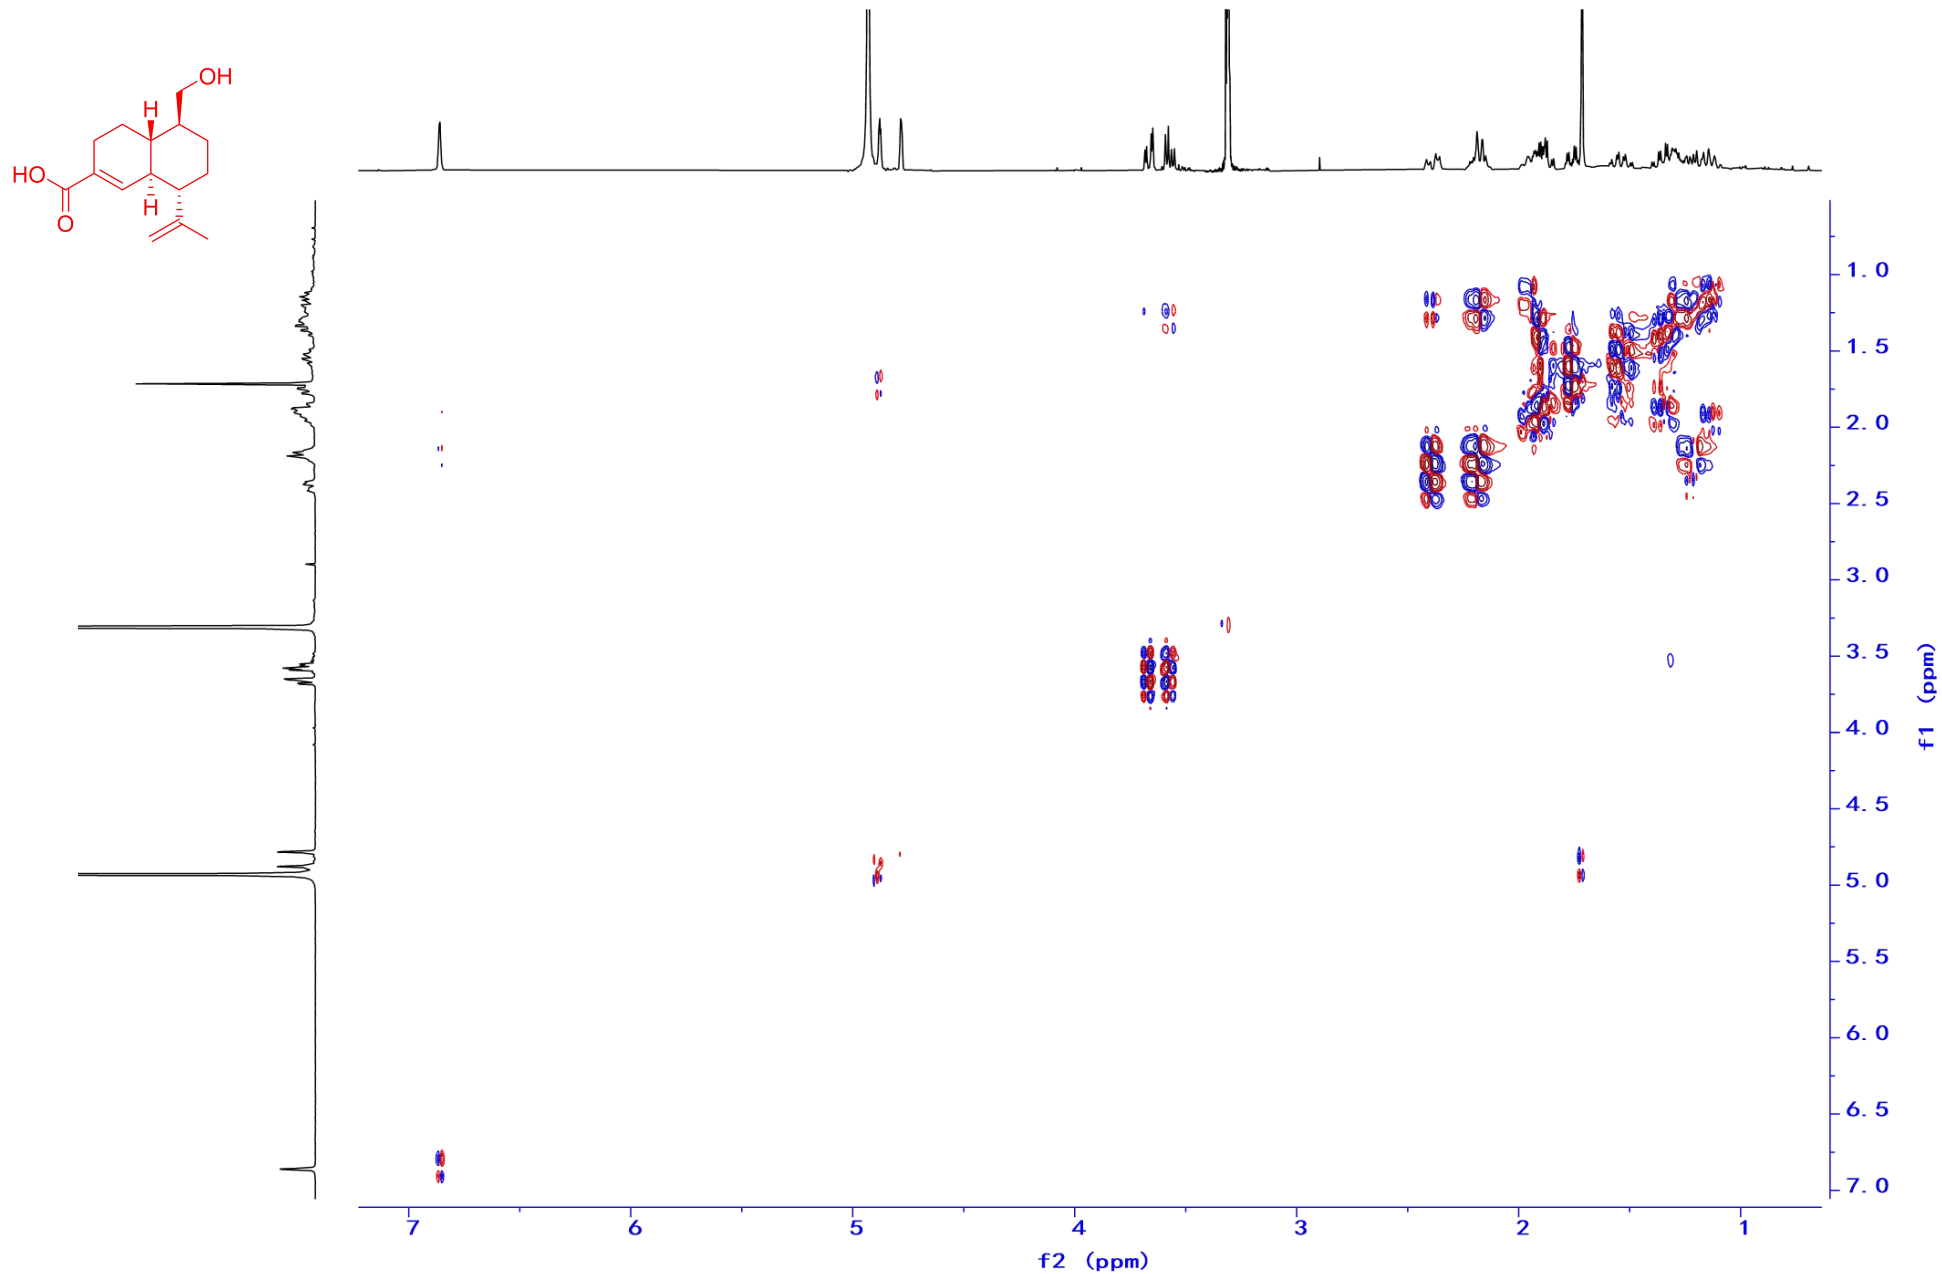

Figure S18. The  $^1\text{H}$ - $^1\text{H}$  COSY Spectrum of Compound 2 in  $\text{MeOH-}d_4$  (500MHz)

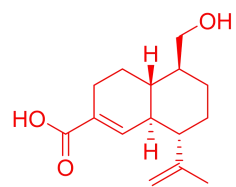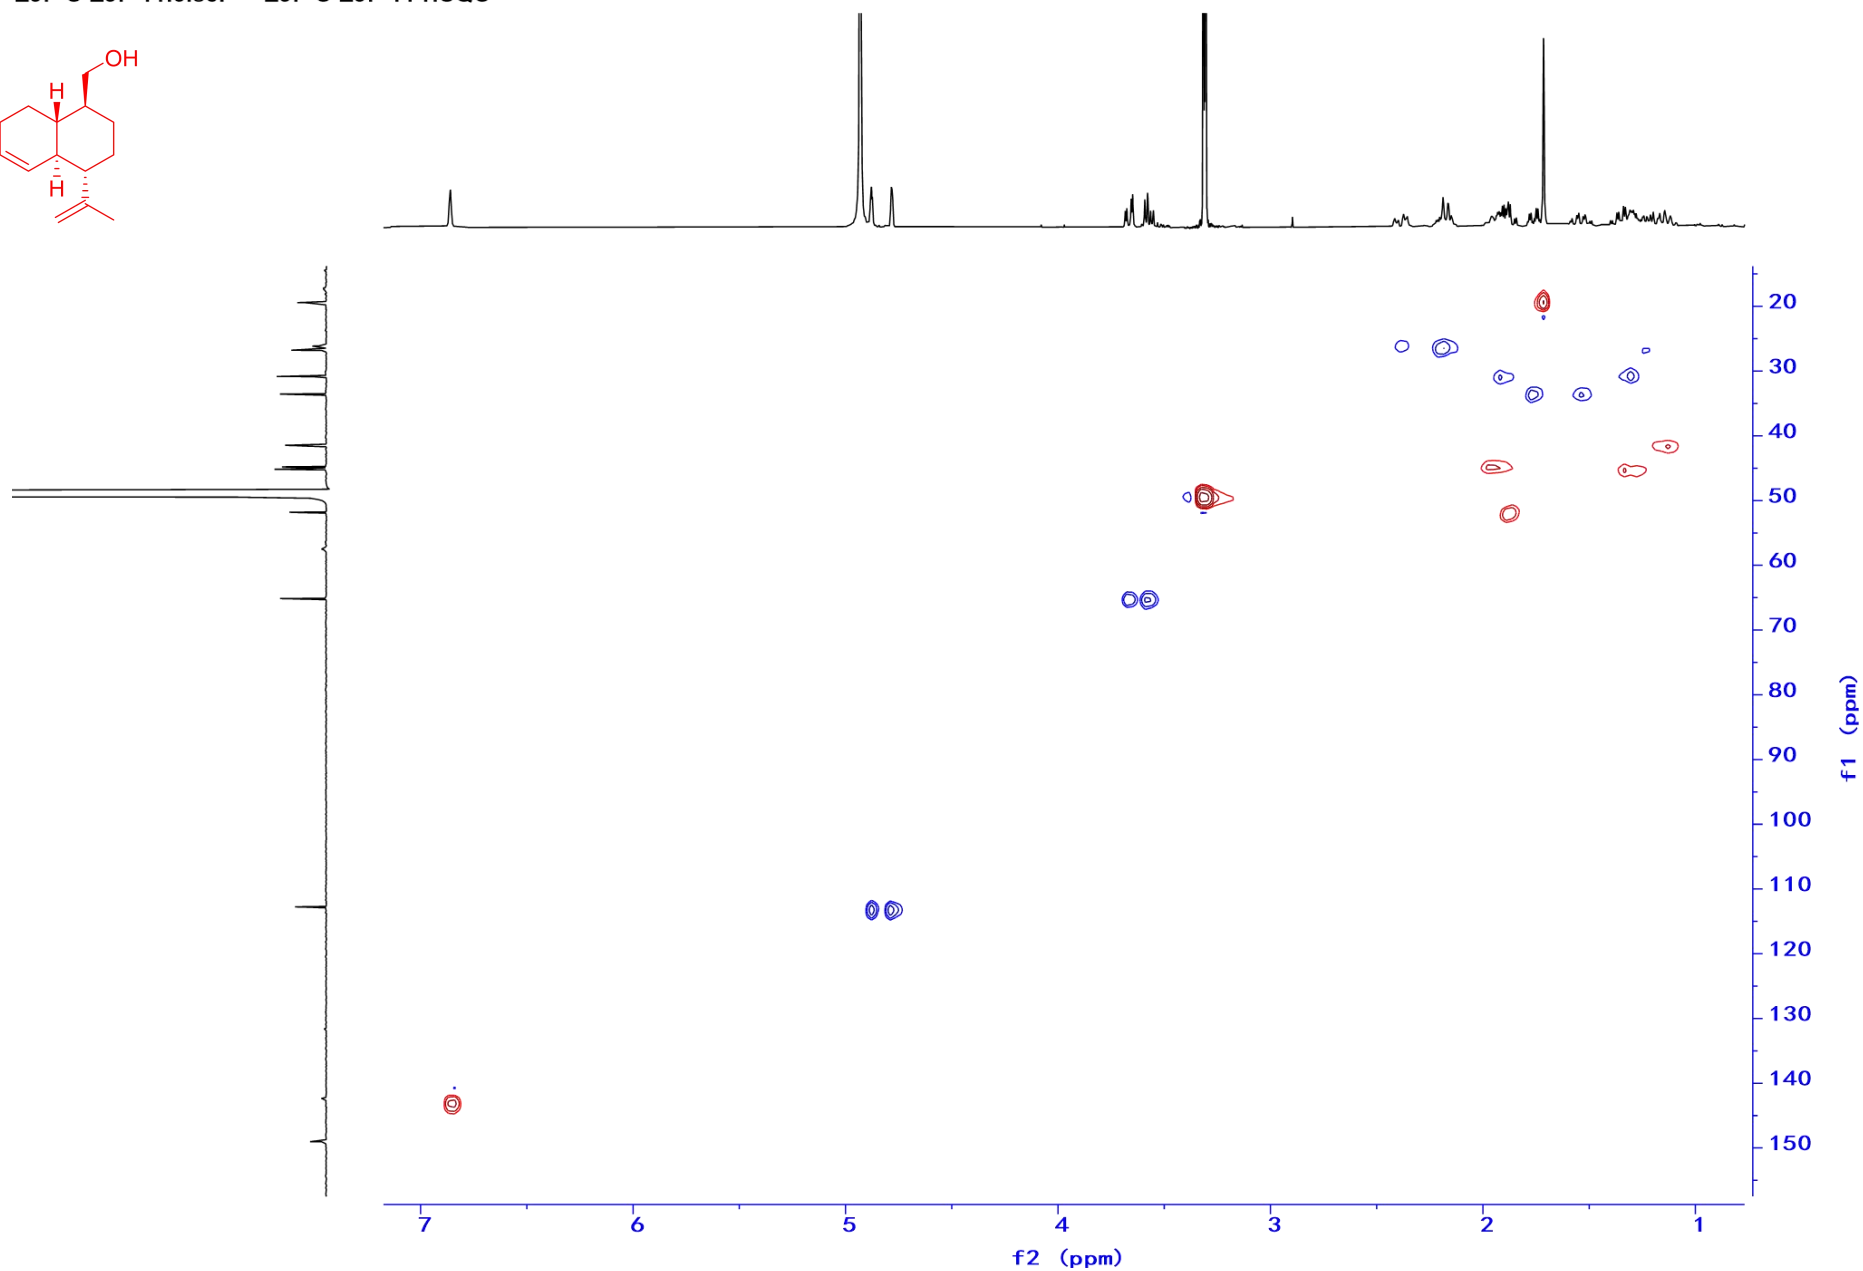

**Figure S19. The HSQC Spectrum of Compound 2 in MeOH- $d_4$  (500MHz)**



ZJF-C-ZJF-11.6.ser — ZJF-C-ZJF-11 HMBC

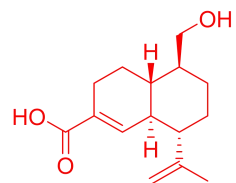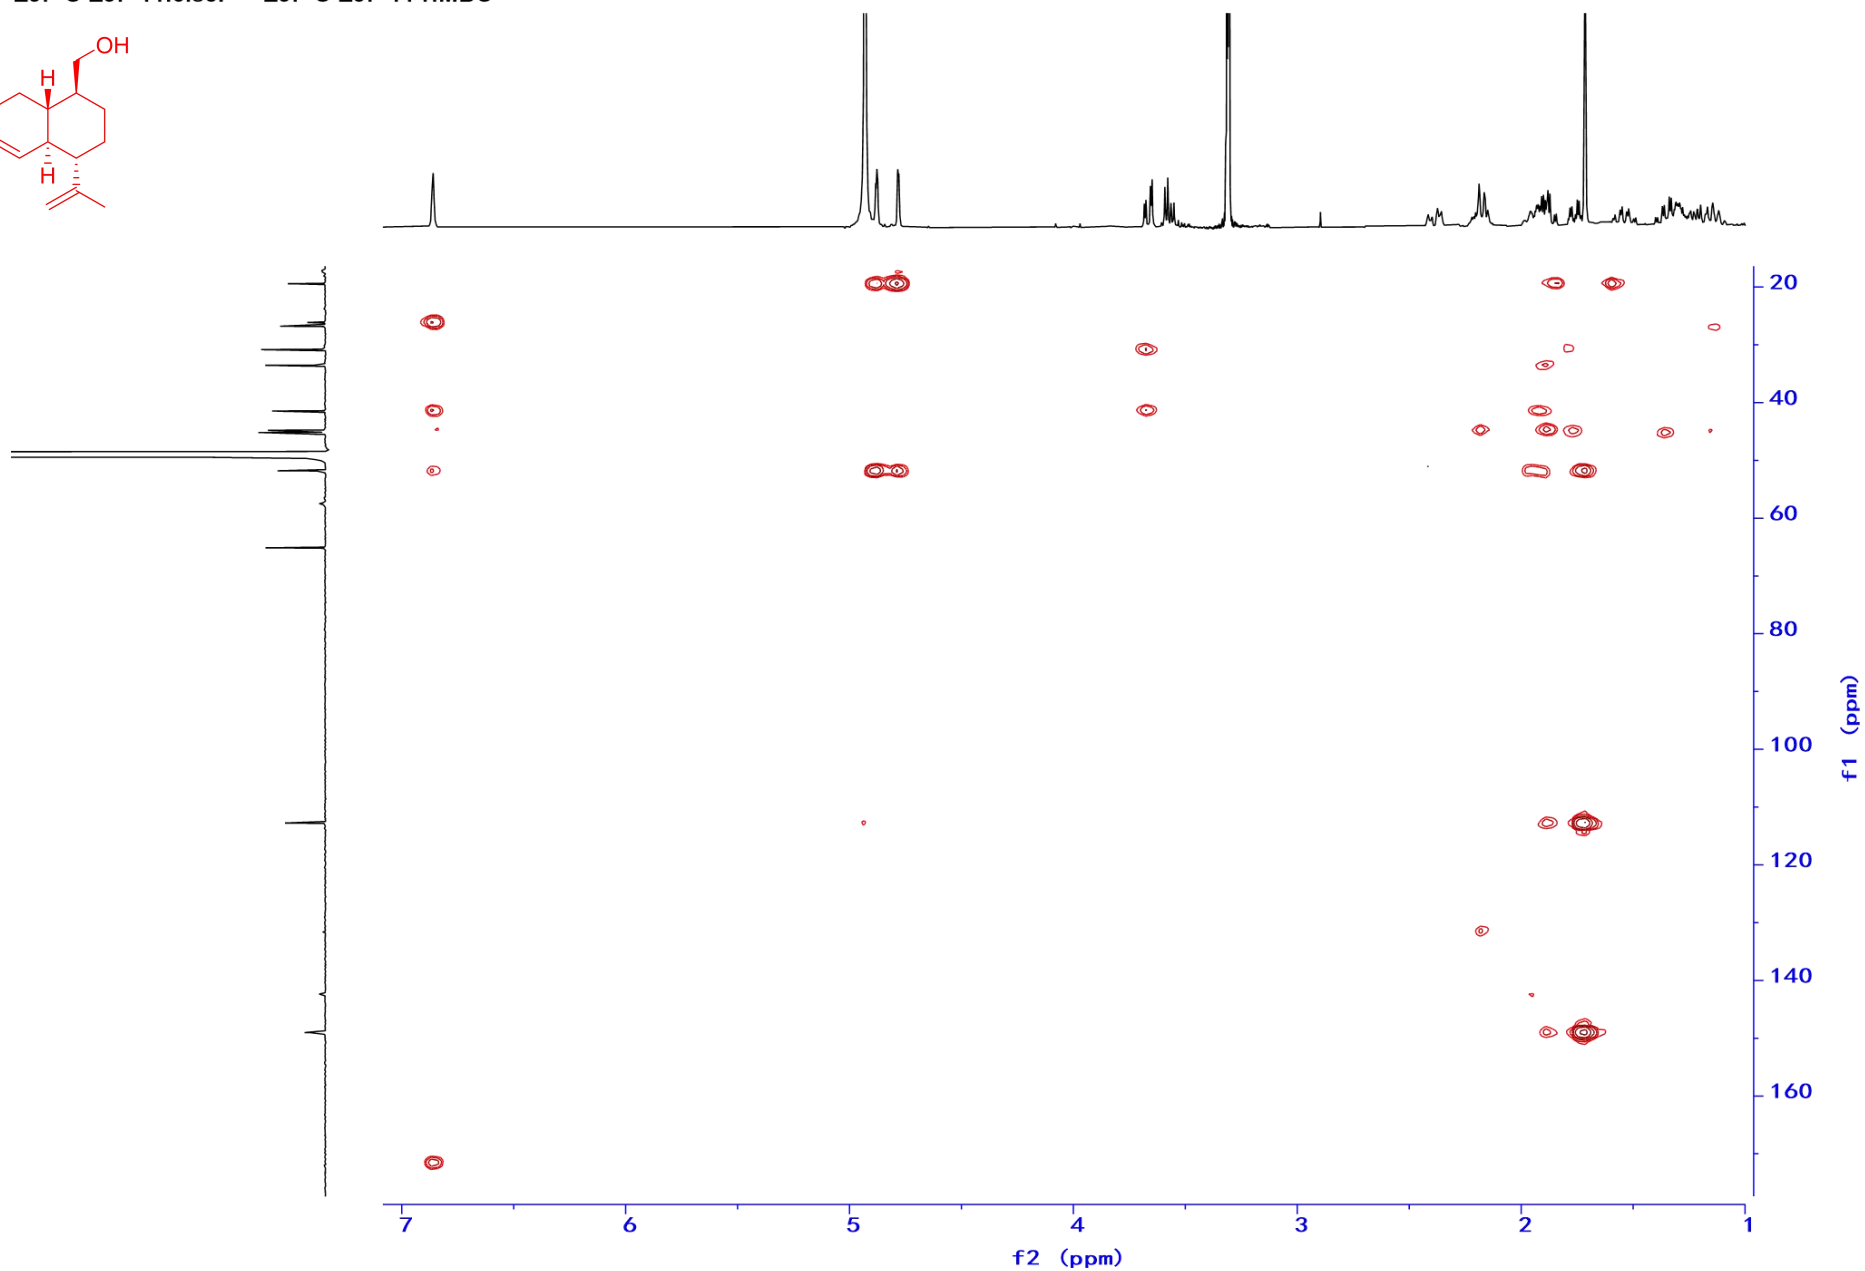

**Figure S20.** The HMBC Spectrum of Compound 2 in MeOH- $d_4$  (500MHz)

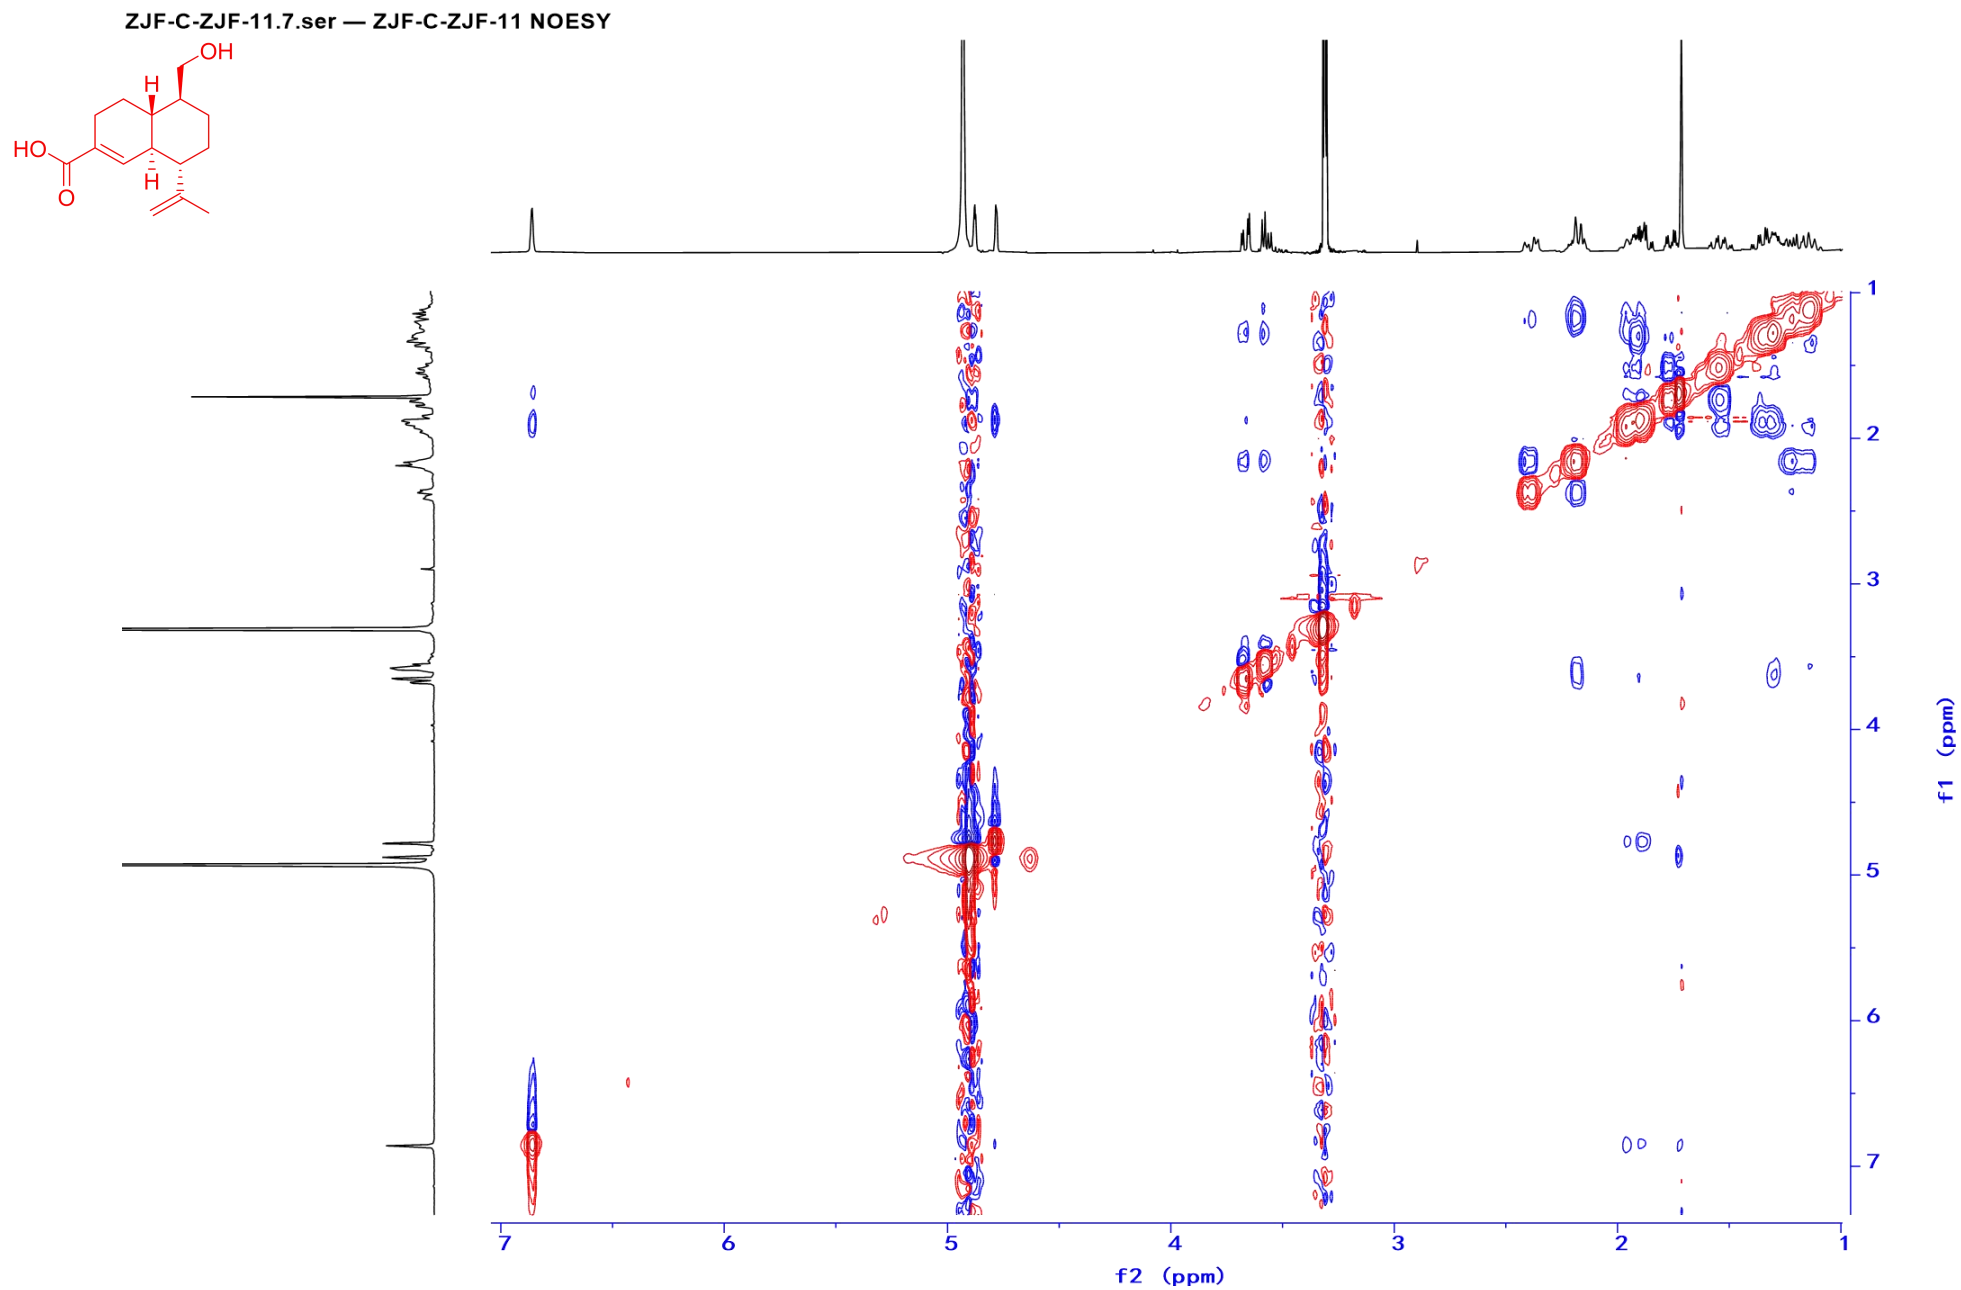

**Figure S21.** The NOESY Spectrum of Compound 2 in  $\text{MeOH-}d_4$  (500MHz)

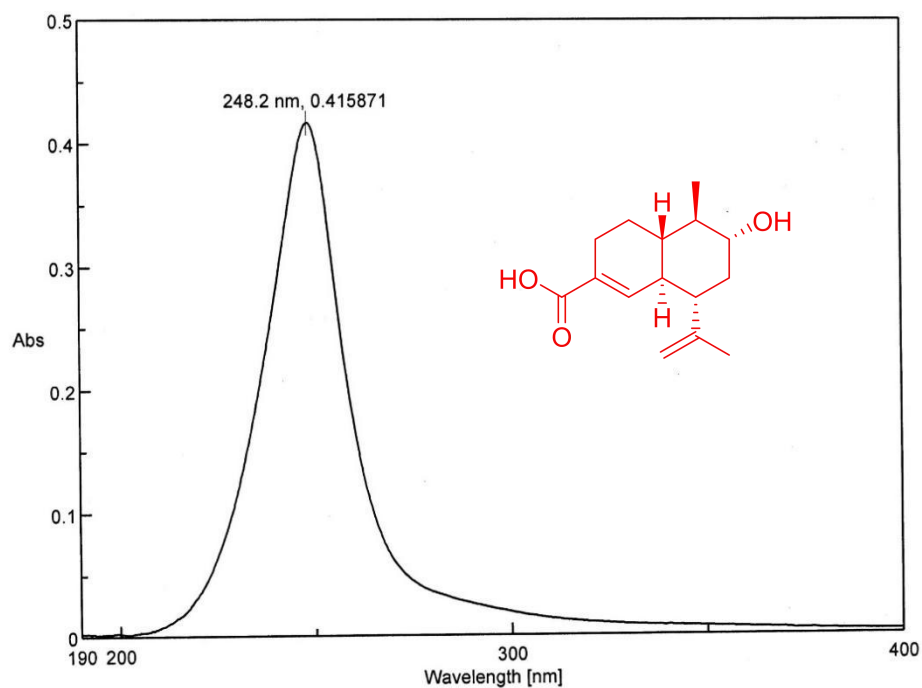

**Figure S22. The UV Spectrum of Compound 3 in MeOH**

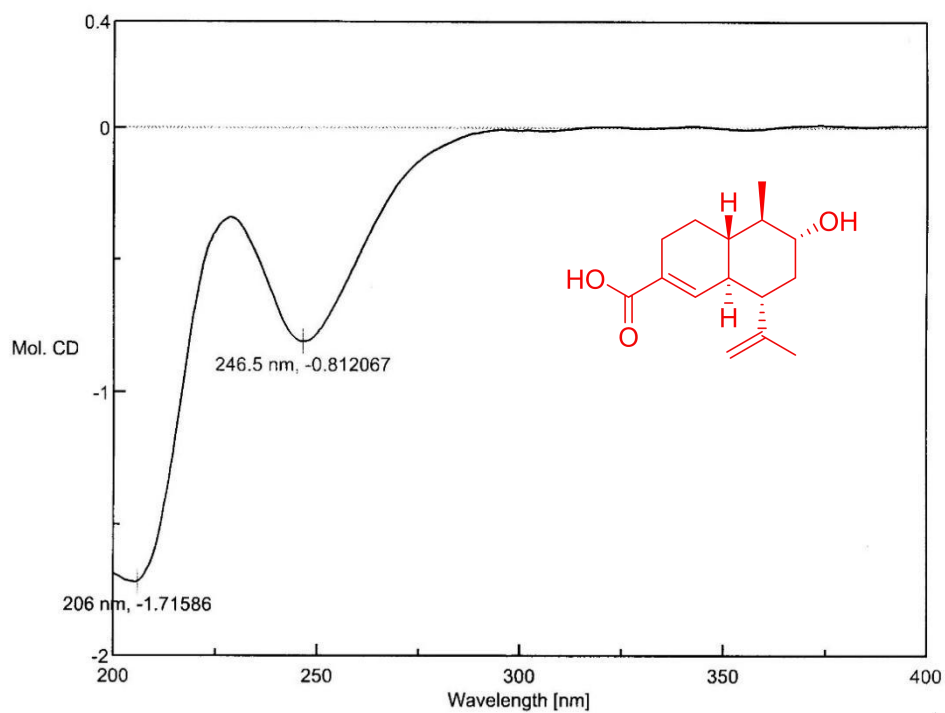

**Figure S23. The CD Spectrum of Compound 3 in MeOH**

MS Formula Results: + Scan (6.441 min) Sub (2016052001.d)

| m/z      | Ion                | Formula                                        | Abundance |
|----------|--------------------|------------------------------------------------|-----------|
| 251.1645 | (M+H) <sup>+</sup> | C <sub>15</sub> H <sub>23</sub> O <sub>3</sub> | 294260.3  |

  

| Best | Formula (M)                                    | Ion Formula                                    | Score | Cross Sco | Mass     | Calc Mass | Calc m/z | Diff (ppm) | Abs Diff (ppm) | Mass Match | Abund Match | Spacing Match | DBE |
|------|------------------------------------------------|------------------------------------------------|-------|-----------|----------|-----------|----------|------------|----------------|------------|-------------|---------------|-----|
| ✓    | C <sub>15</sub> H <sub>22</sub> O <sub>3</sub> | C <sub>15</sub> H <sub>23</sub> O <sub>3</sub> | 99.86 |           | 250.1573 | 250.1569  | 251.1642 | -1.47      | 1.47           | 99.94      | 99.73       | 99.86         | 5   |

**Figure S24. The HR-mass Spectrum of Compound 3 in MeOH**

PROTON\_01 — DD2-500 LYC-C26 IN cd3od id-Probe —

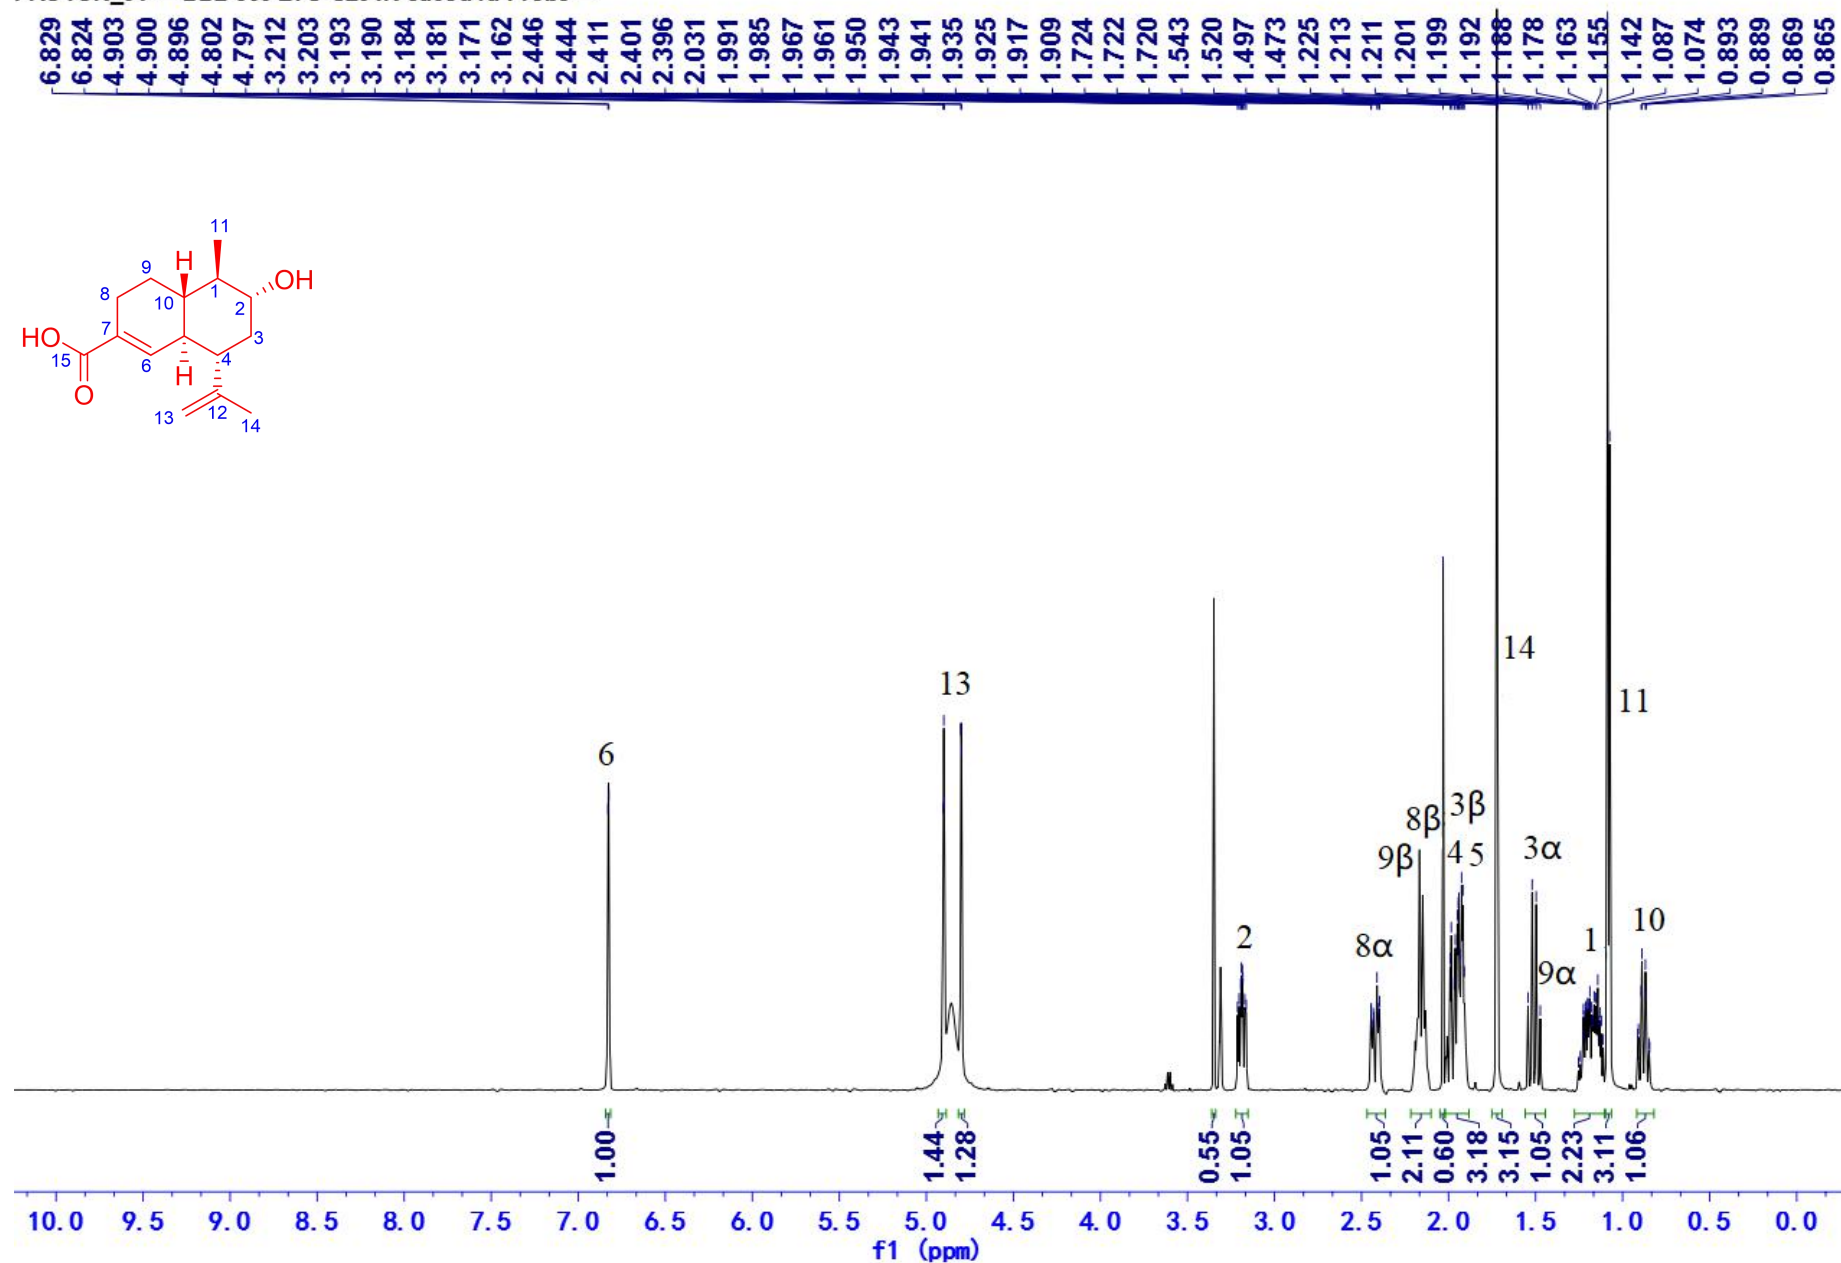

Figure S25. The  $^1\text{H}$  NMR Spectrum of Compound 3 in  $\text{MeOH}-d_4$  (500MHz)

CARBON\_01 — DD2-500 CARBON LYC-C26 IN cd3od May 10 2016 sw —

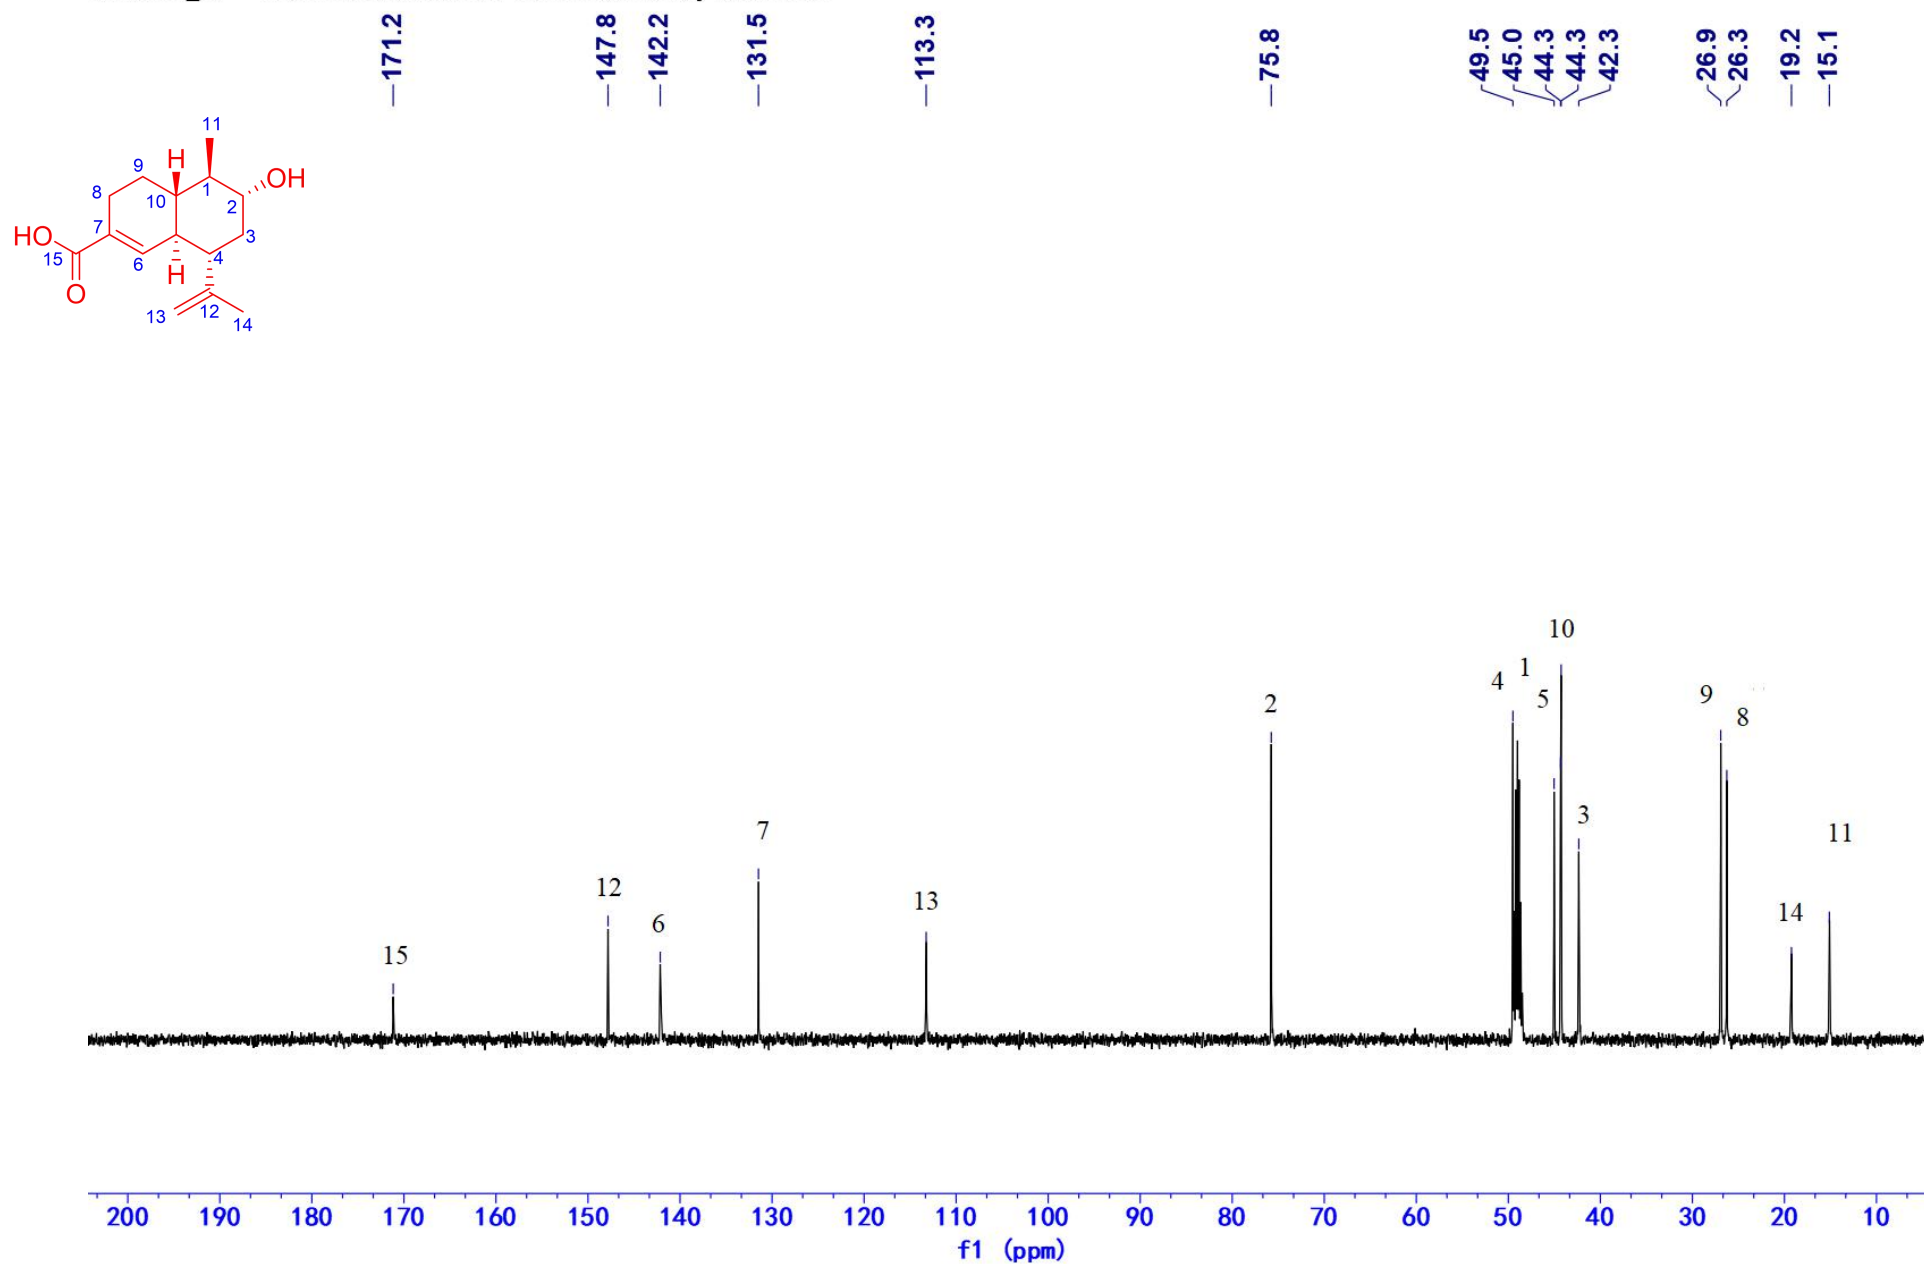

Figure S26. The <sup>13</sup>C NMR Spectrum of Compound 3 in MeOH-*d*<sub>4</sub> (125MHz)

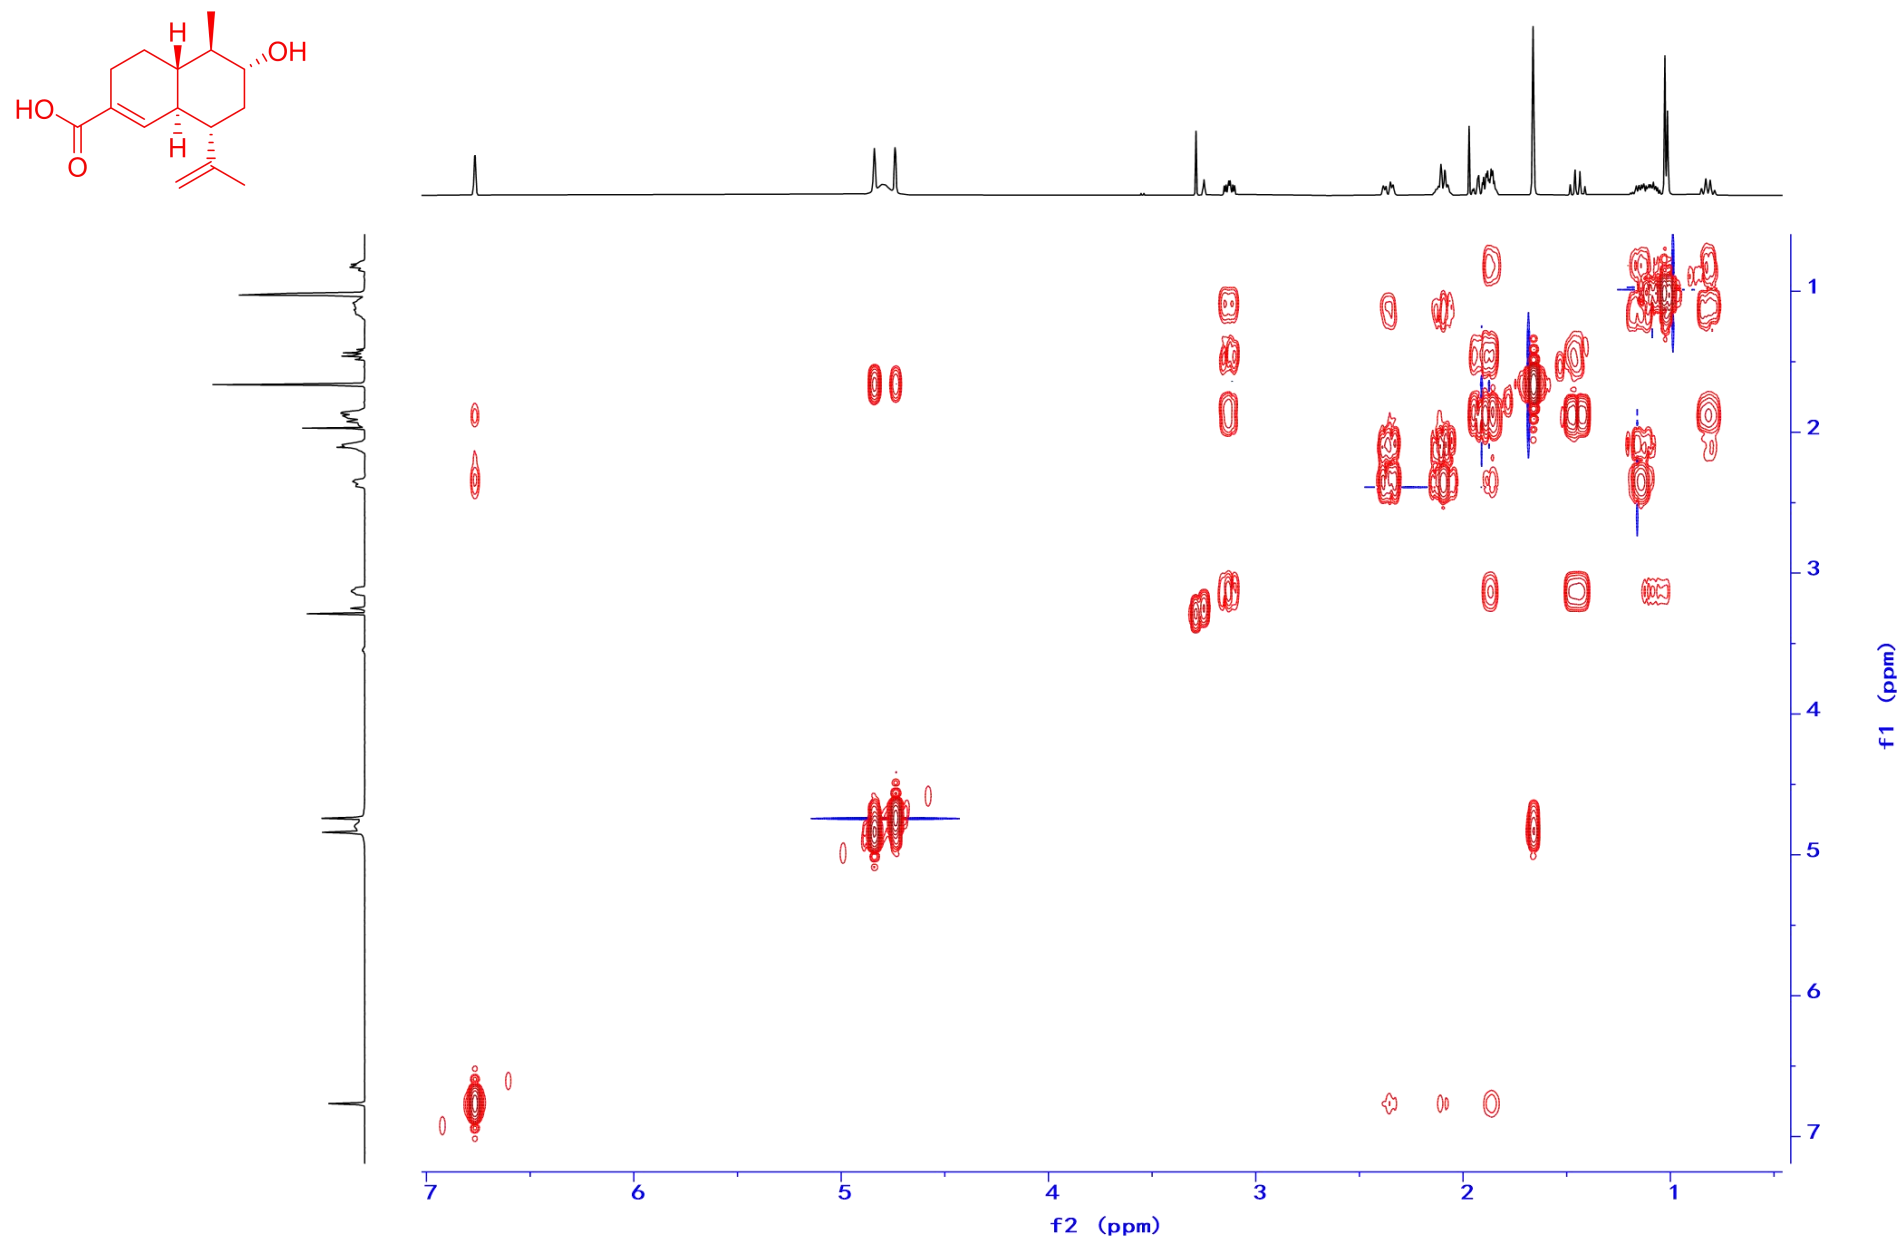

Figure27. The  $^1\text{H}$ - $^1\text{H}$  COSY Spectrum of Compound 3 in  $\text{MeOH-}d_4$  (500MHz)

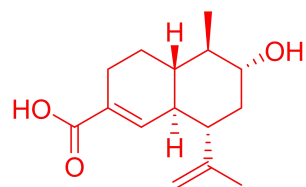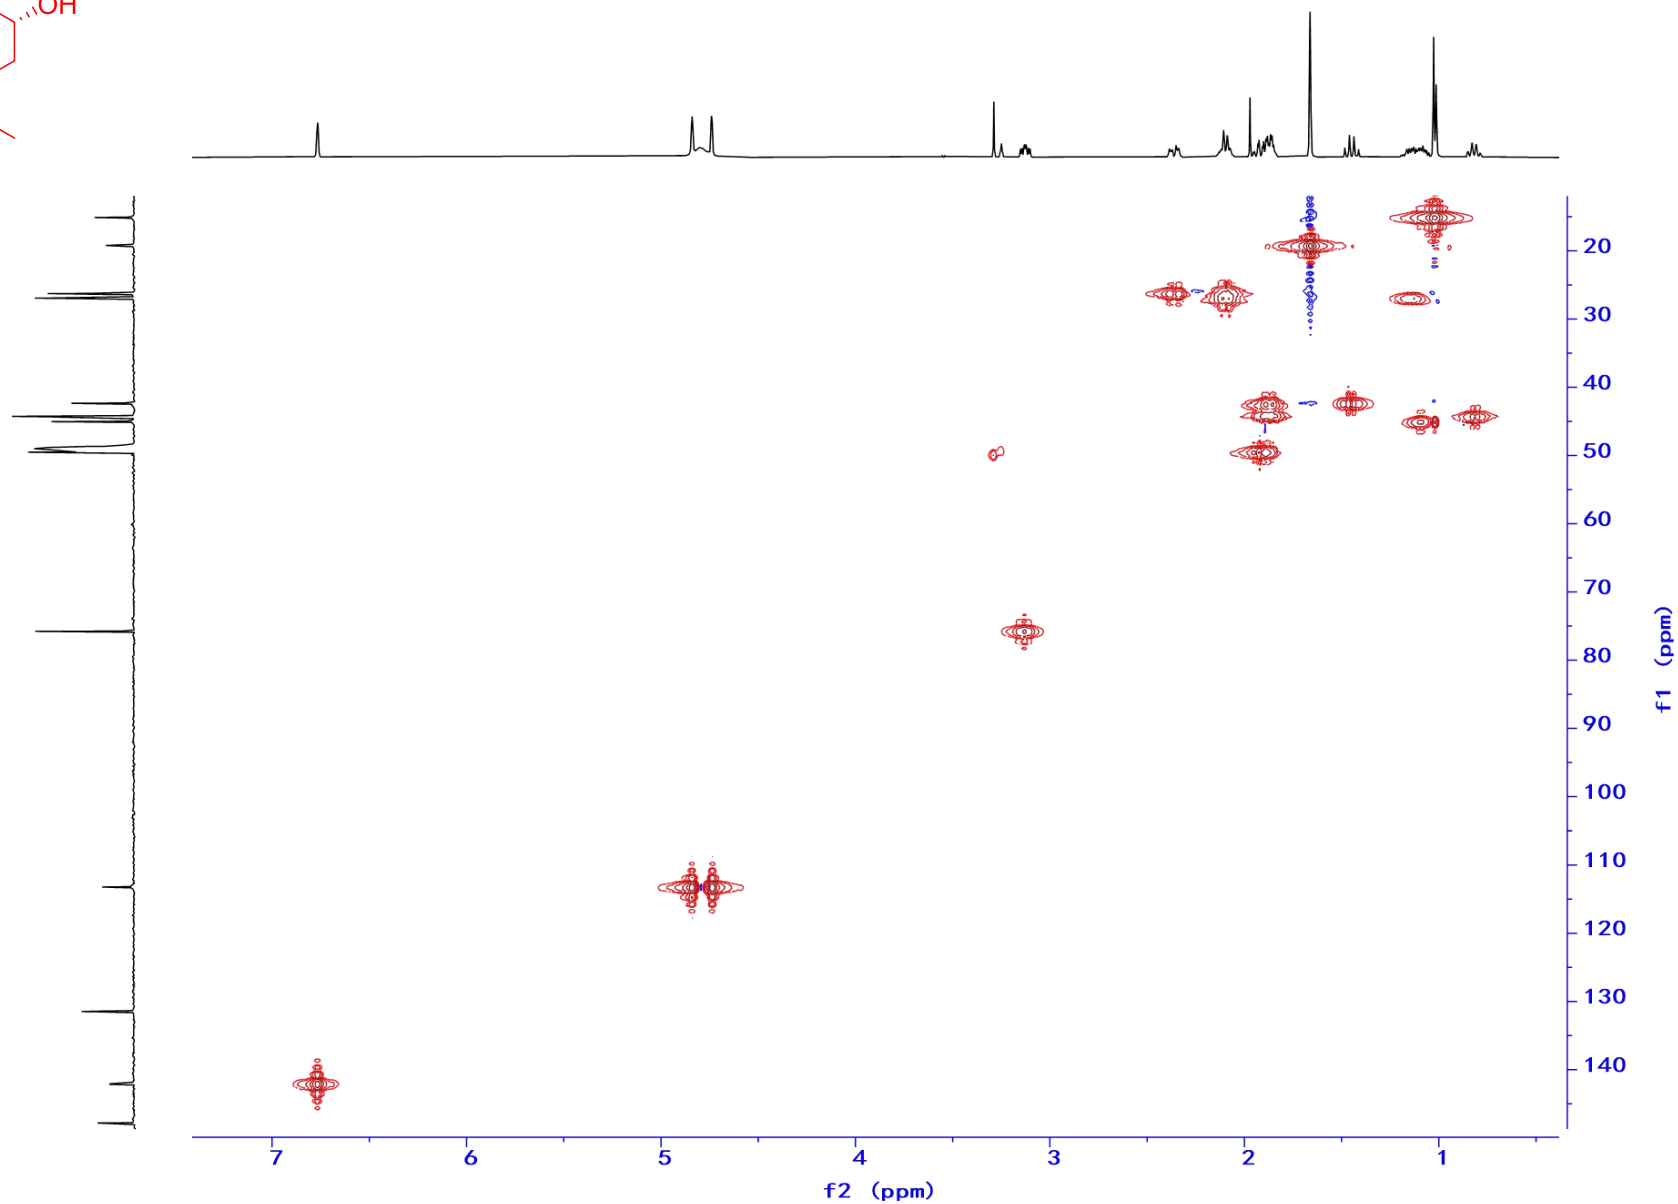

Figure S28. The HSQC Spectrum of Compound 3 in MeOH- $d_4$  (500MHz)

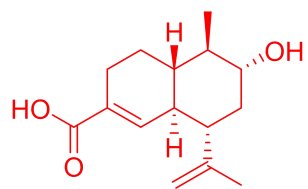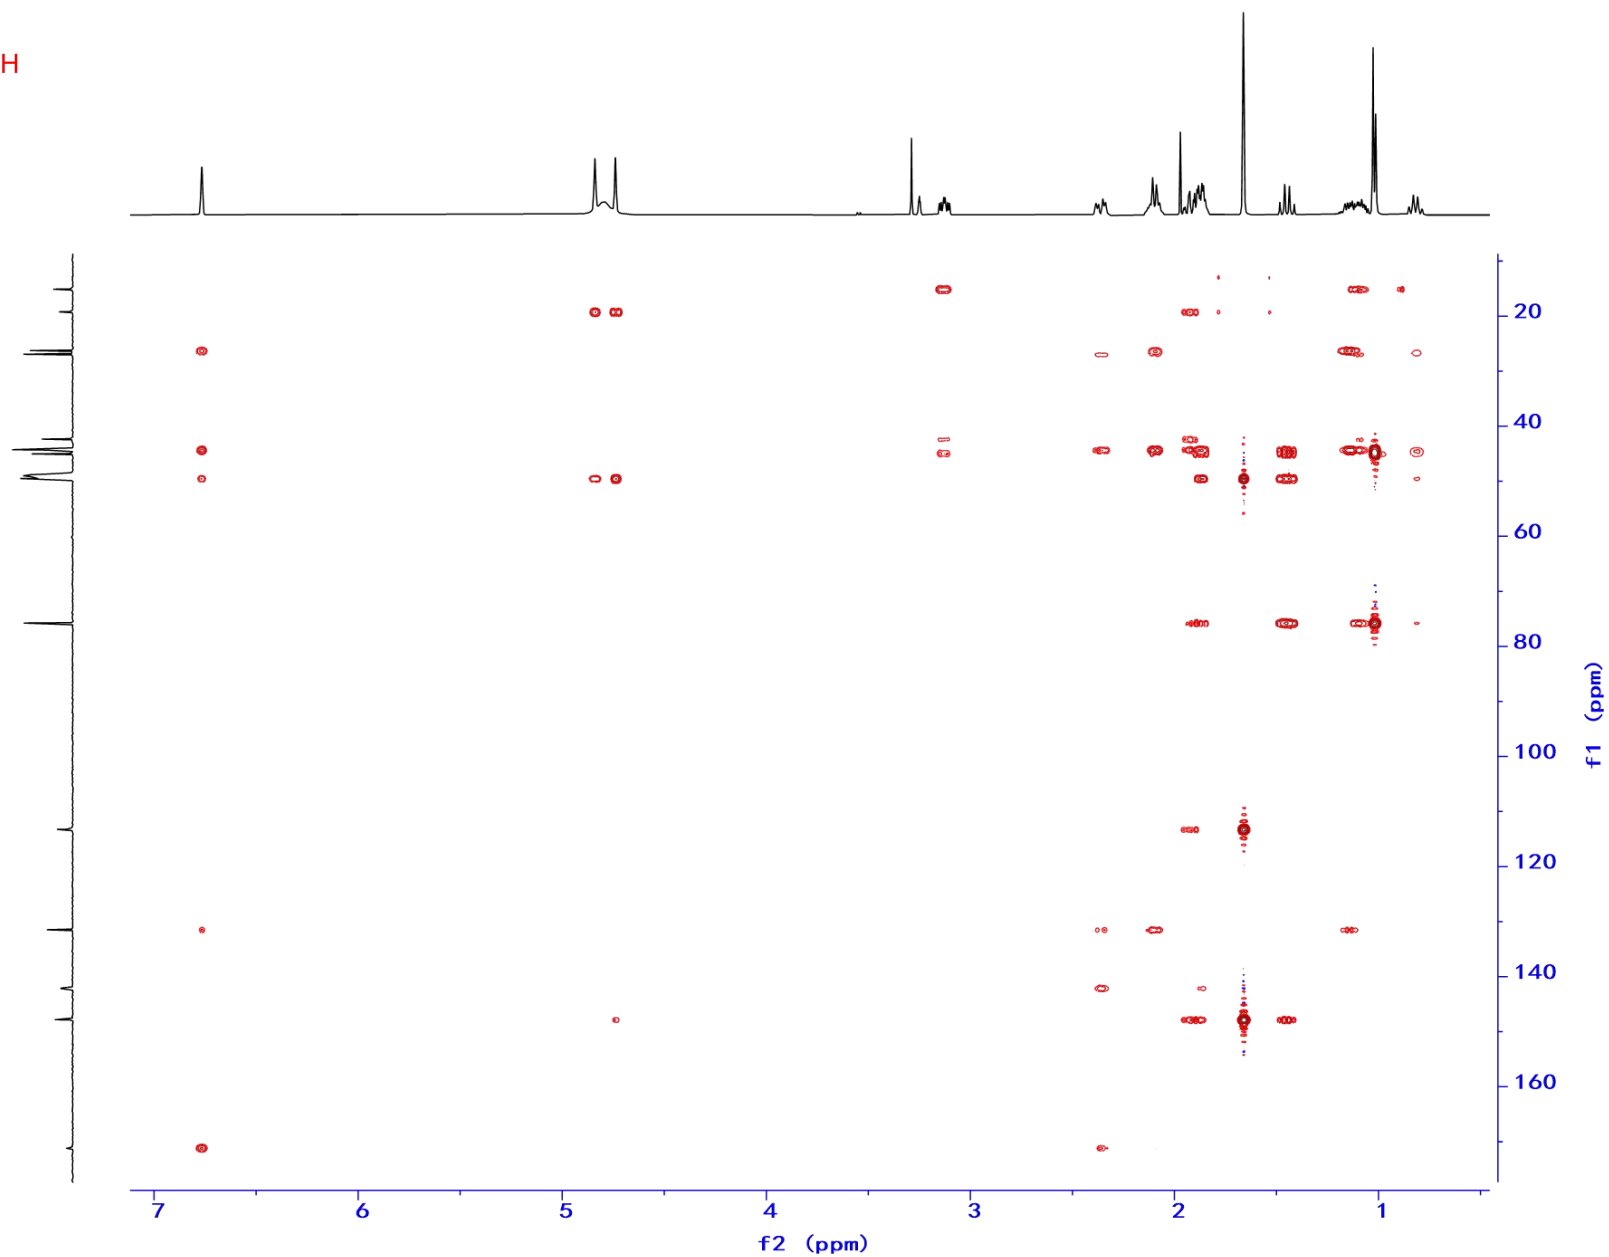

**Figure S29.** The HMBC Spectrum of Compound 3 in MeOH- $d_4$  (500MHz)



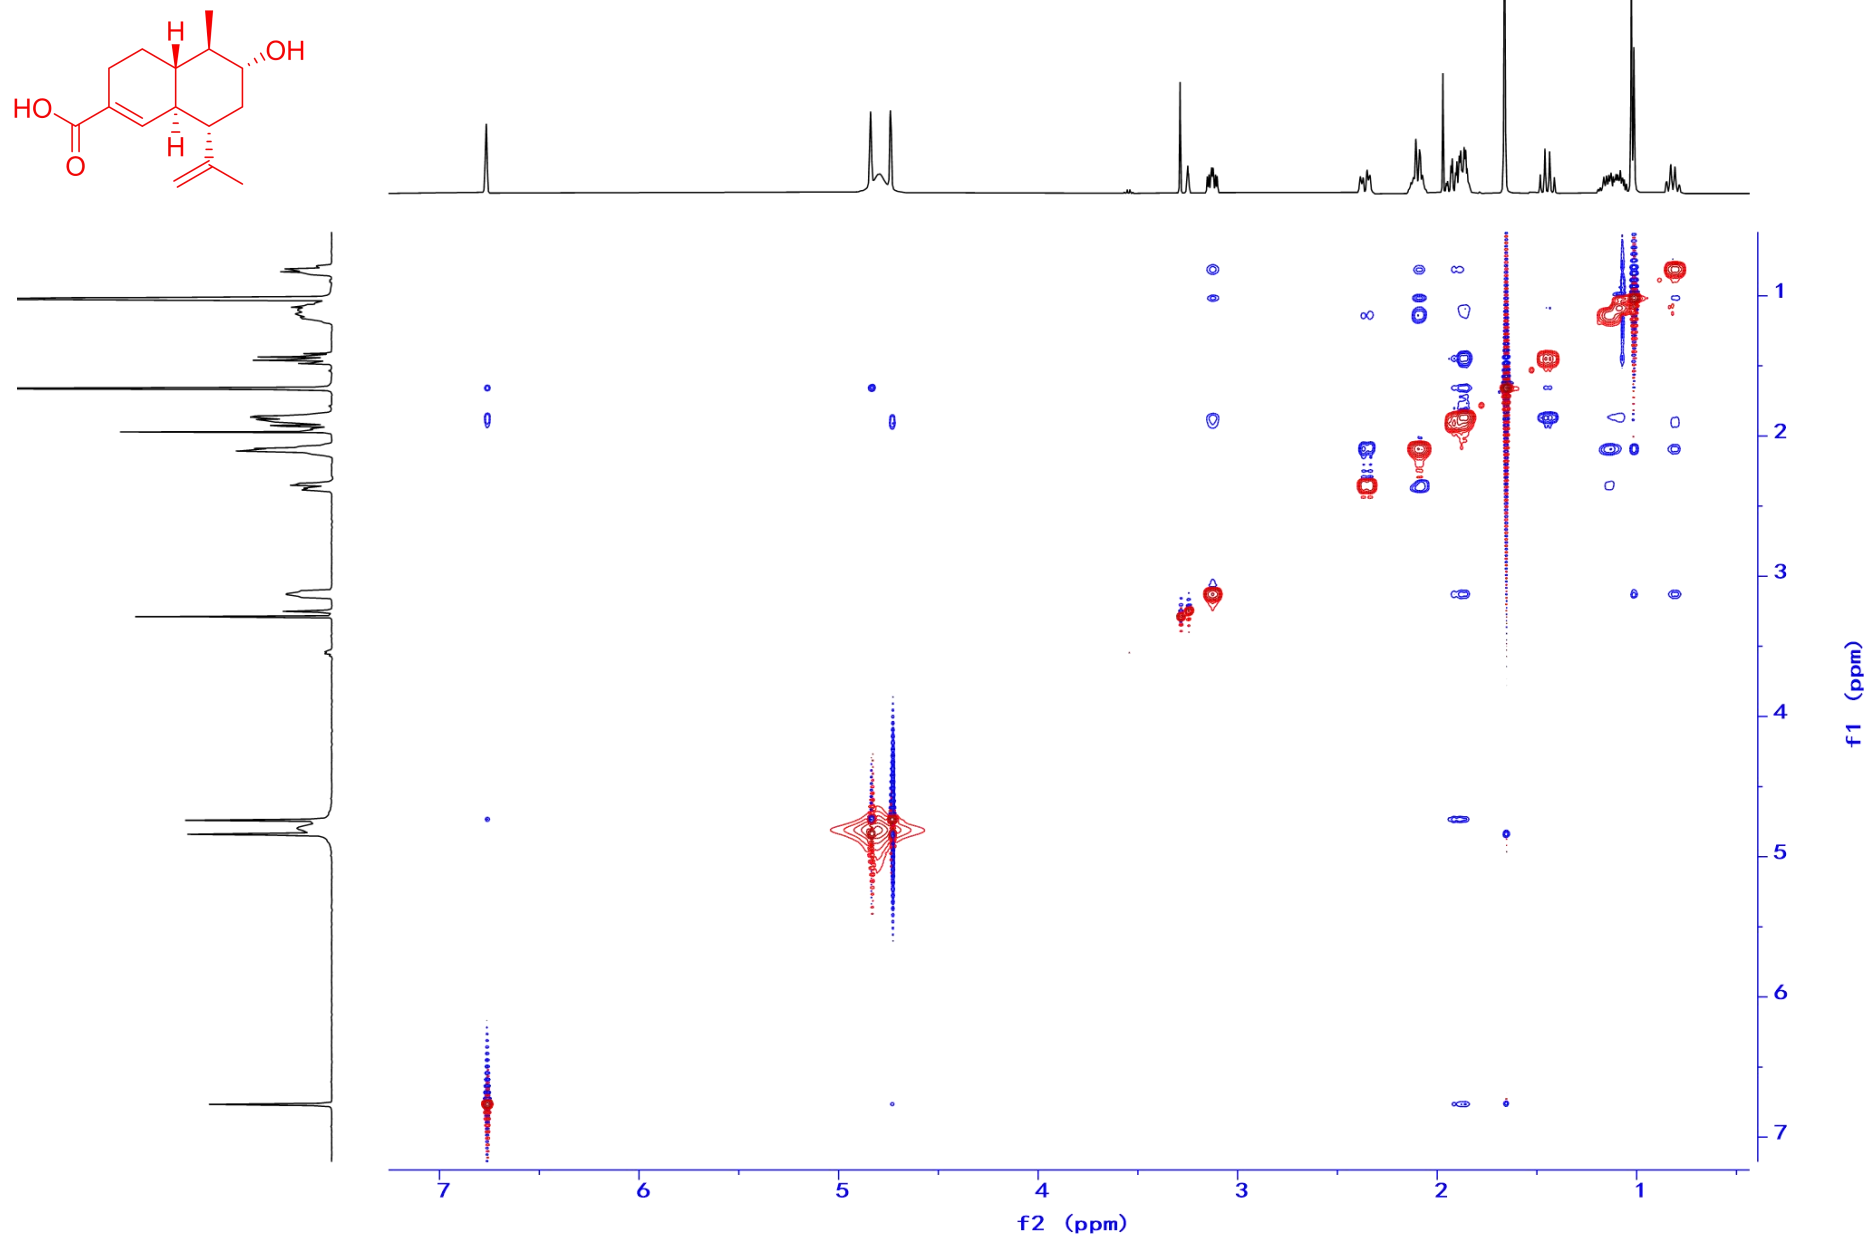

Figure S30. The NOESY Spectrum of Compound 3 in MeOH-*d*<sub>4</sub> (500MHz)

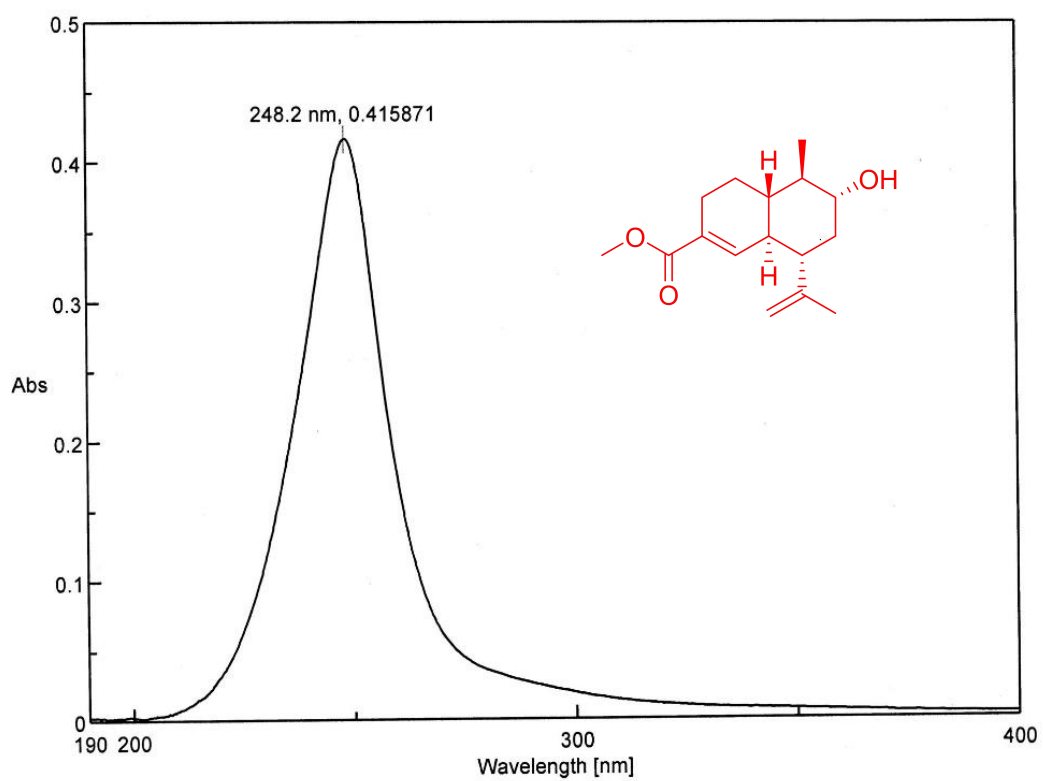

**Figure S31.** The UV Spectrum of Compound 4 in MeOH

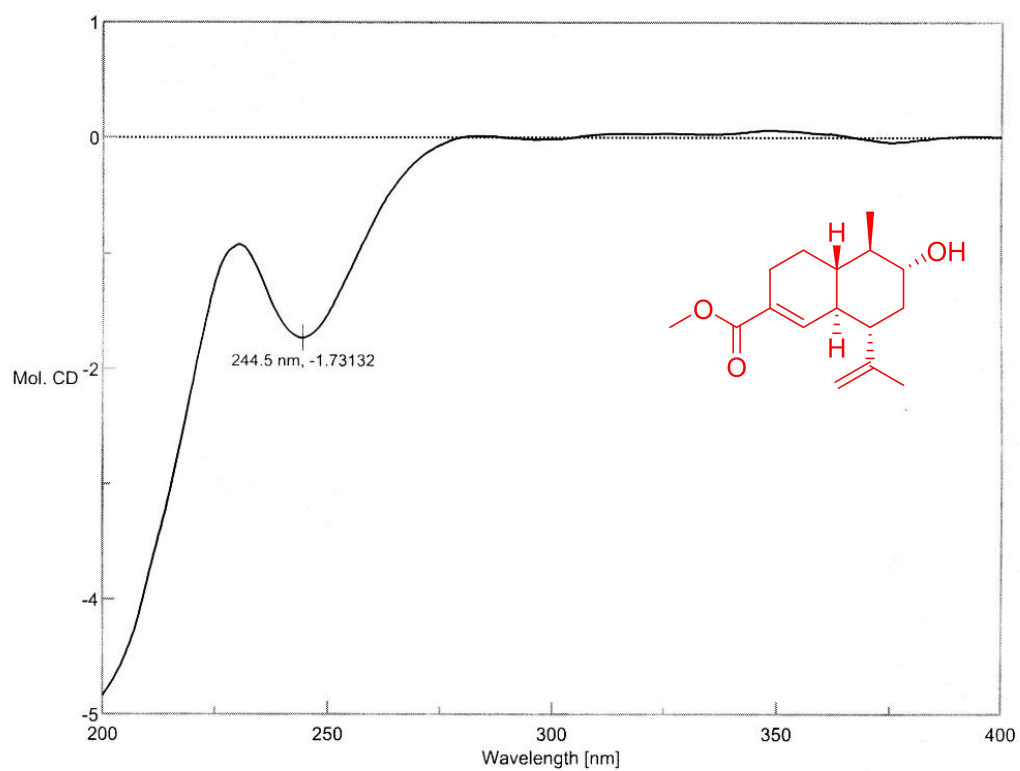

**Figure S32.** The CD Spectrum of Compound 4 in MeOH

MS Formula Results: + Scan (7.367 min) Sub (2016031002.d)

| m/z      | Ion                | Formula    | Abundance |
|----------|--------------------|------------|-----------|
| 265.1804 | (M+H) <sup>+</sup> | C16 H25 O3 | 393274.3  |

  

| Best                                | Formula (M)   | Ion Formula   | Score | Cross Sco | Mass     | Calc Mass | Calc m/z | Diff (ppm) | Abs Diff (ppm) | Mass Match | Abund Match | Spacing Match | DBE |
|-------------------------------------|---------------|---------------|-------|-----------|----------|-----------|----------|------------|----------------|------------|-------------|---------------|-----|
| <input checked="" type="checkbox"/> | C16 H24 O3    | C16 H25 O3    | 99.68 |           | 264.1731 | 264.1725  | 265.1798 | -2.18      | 2.18           | 99.86      | 99.72       | 99.28         | 5   |
| <input type="checkbox"/>            | C11 H24 N2 O5 | C11 H25 N2 O5 | 94.43 |           | 264.1731 | 264.1685  | 265.1758 | -17.41     | 17.41          | 91.31      | 95.38       | 99.51         | 1   |
| <input type="checkbox"/>            | C18 H20 N2    | C18 H21 N2    | 81.84 |           | 264.1731 | 264.1626  | 265.1699 | -39.64     | 39.64          | 62.43      | 99.65       | 99.3          | 10  |
| <input type="checkbox"/>            | C15 H24 N2 O2 | C15 H25 N2 O2 | 81.34 |           | 264.1731 | 264.1838  | 265.1911 | 40.34      | 40.34          | 61.4       | 99.53       | 99.39         | 5   |
| <input type="checkbox"/>            | C20 H24       | C20 H25       | 70.77 |           | 264.1731 | 264.1878  | 265.1951 | 55.57      | 55.57          | 39.63      | 99.02       | 99.16         | 9   |

Figure S33. The HR-mass Spectrum of Compound 4 in MeOH

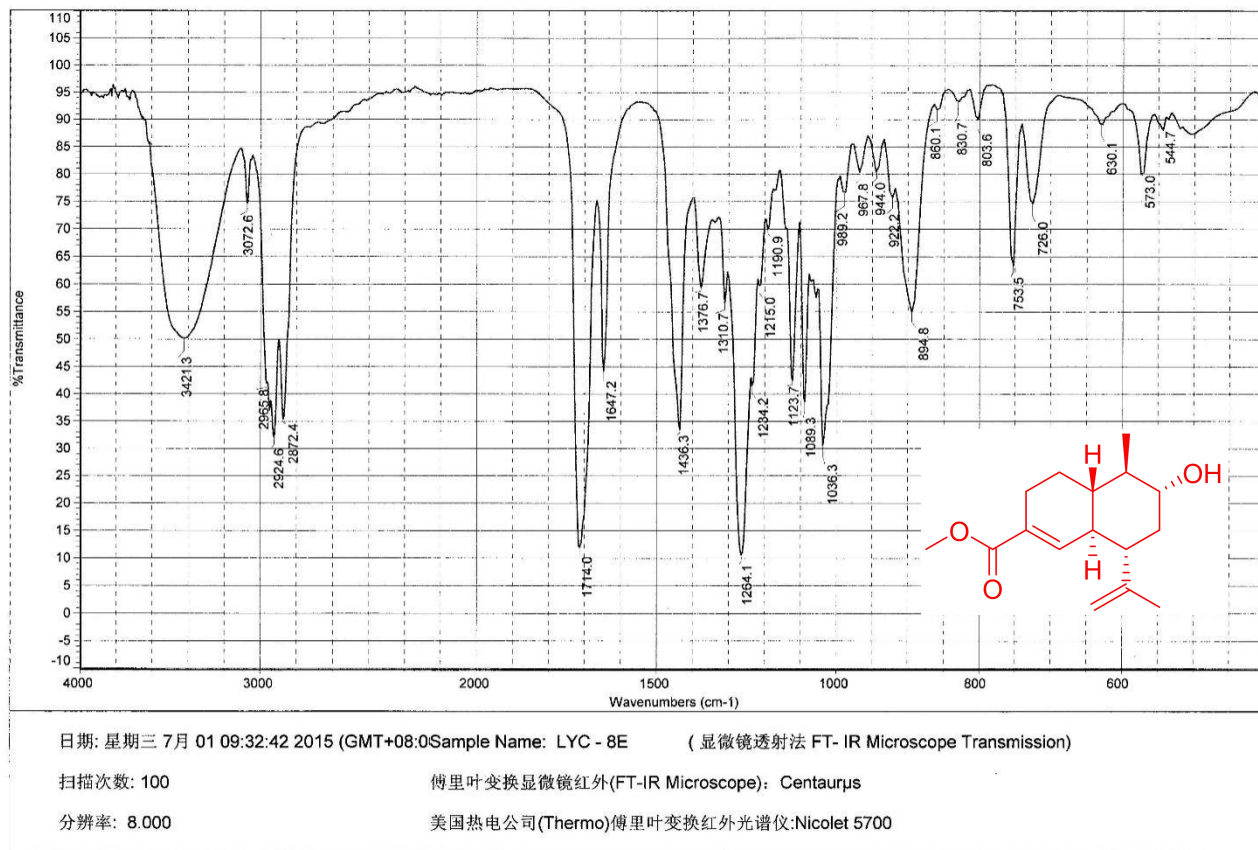

Figure S34. The IR Spectrum of Compound 4

PROTON\_01 — DD2-500 LYC-8E IN cdcl3 sw-Probe —

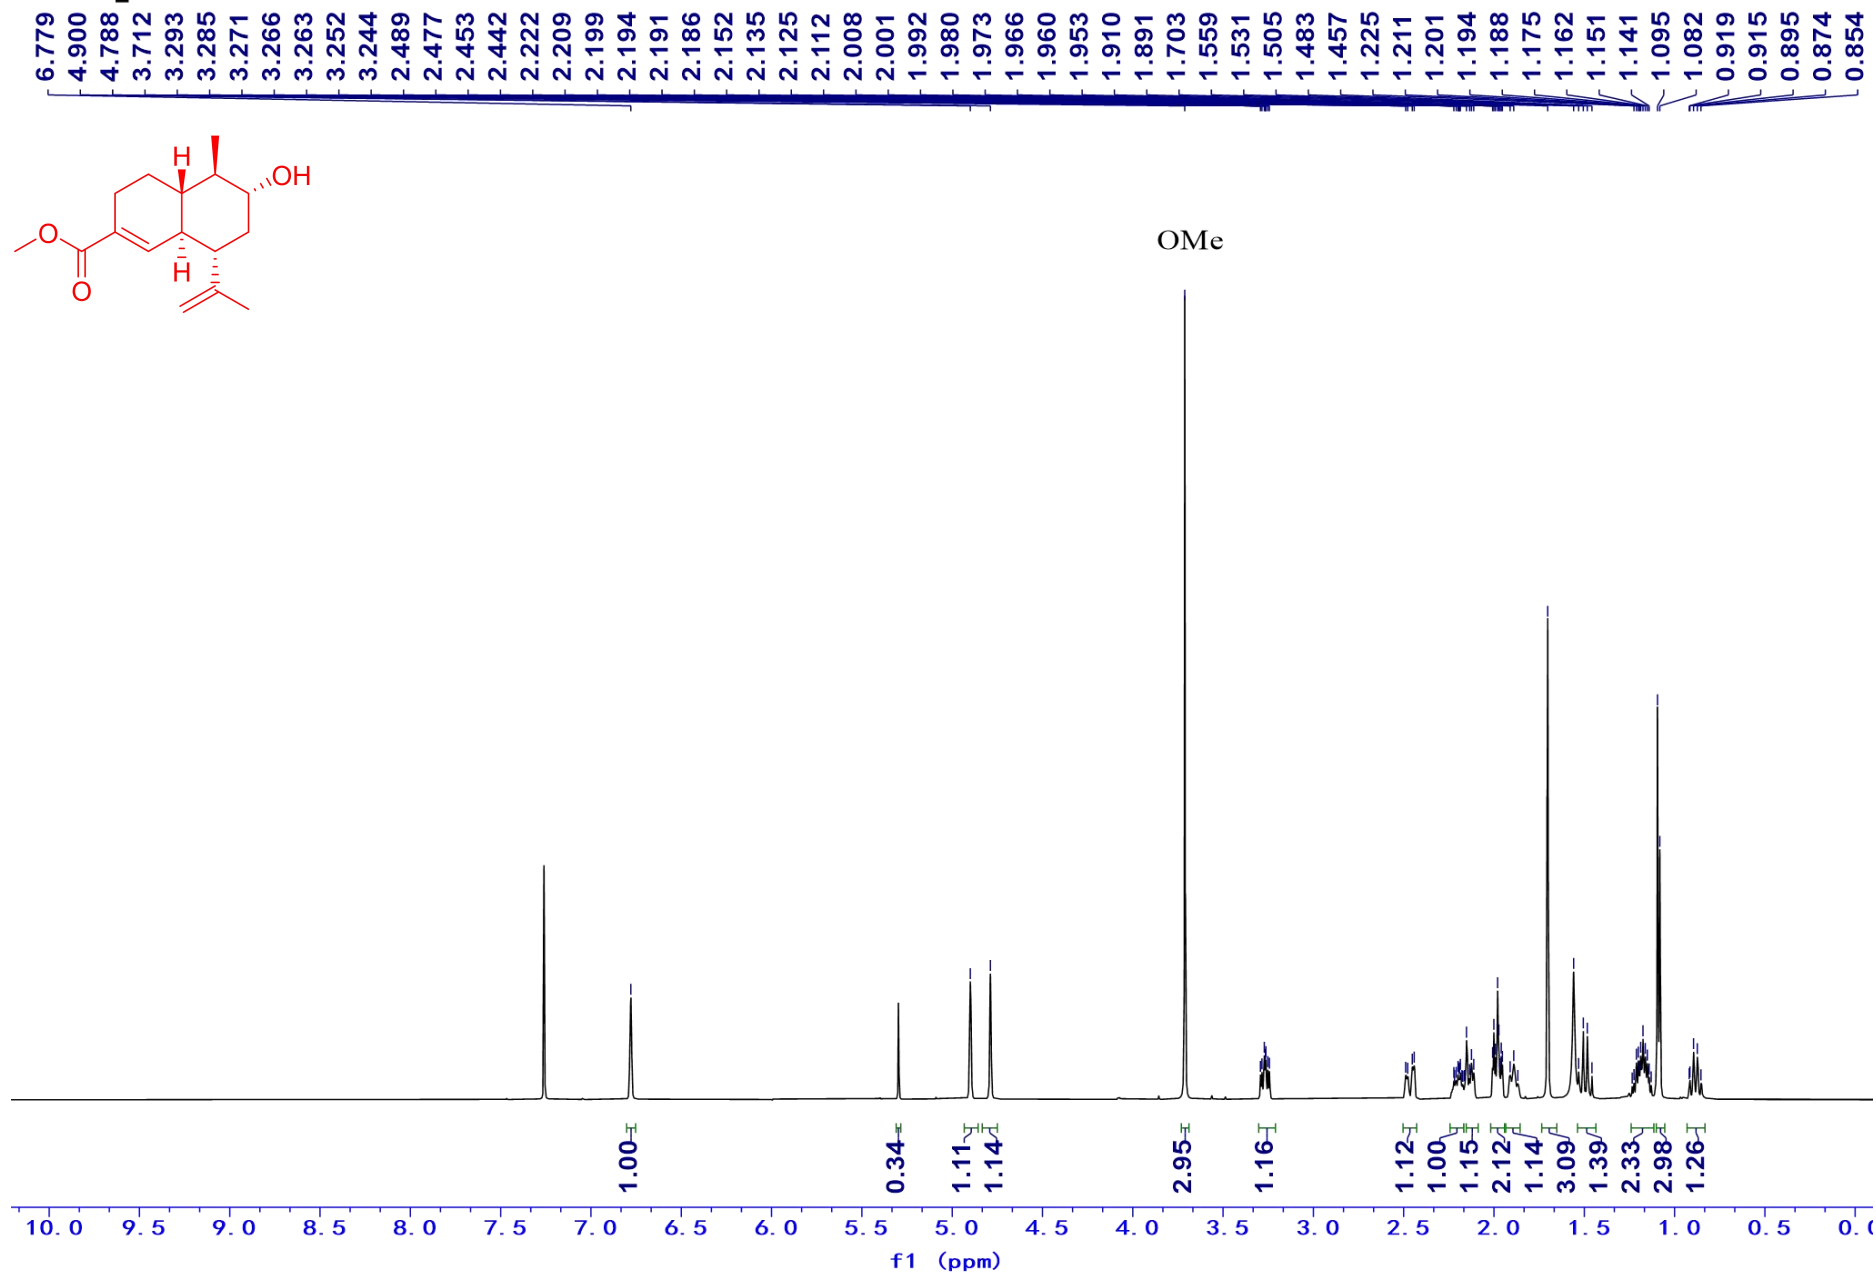

Figure S35. The <sup>1</sup>H NMR Spectrum of Compound 4 in CDCl<sub>3</sub> (500MHz)

CARBON\_01 — DD2-500 LYC-8E IN cdcl3 sw-Probe —

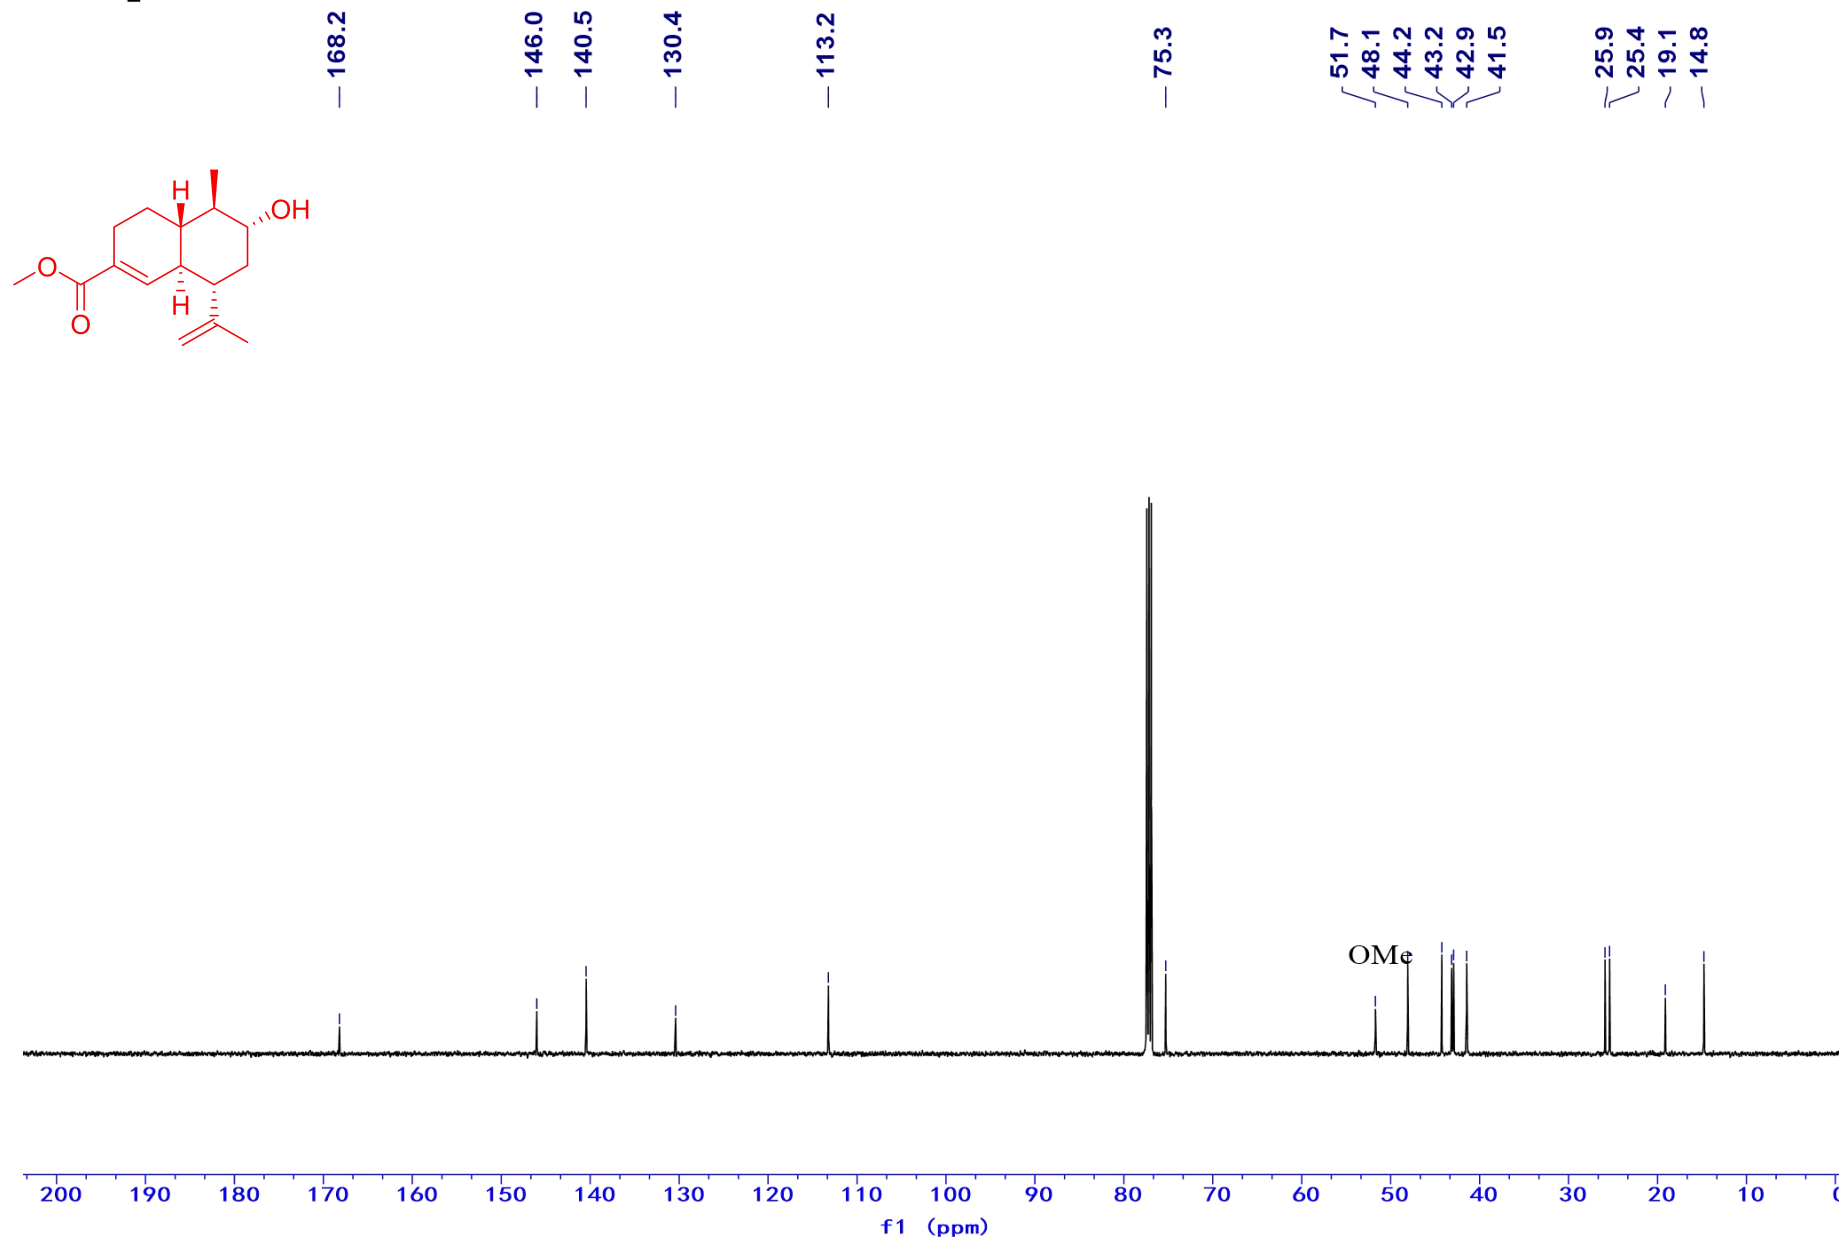

Figure S36. The  $^{13}\text{C}$  NMR Spectrum of Compound 4 in  $\text{CDCl}_3$  (125MHz)

gCOSY\_01 — DD2-500 LYC-8E IN cdcl3 id-Probe —

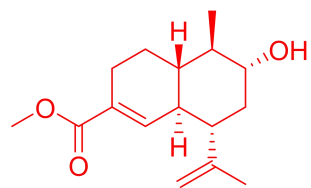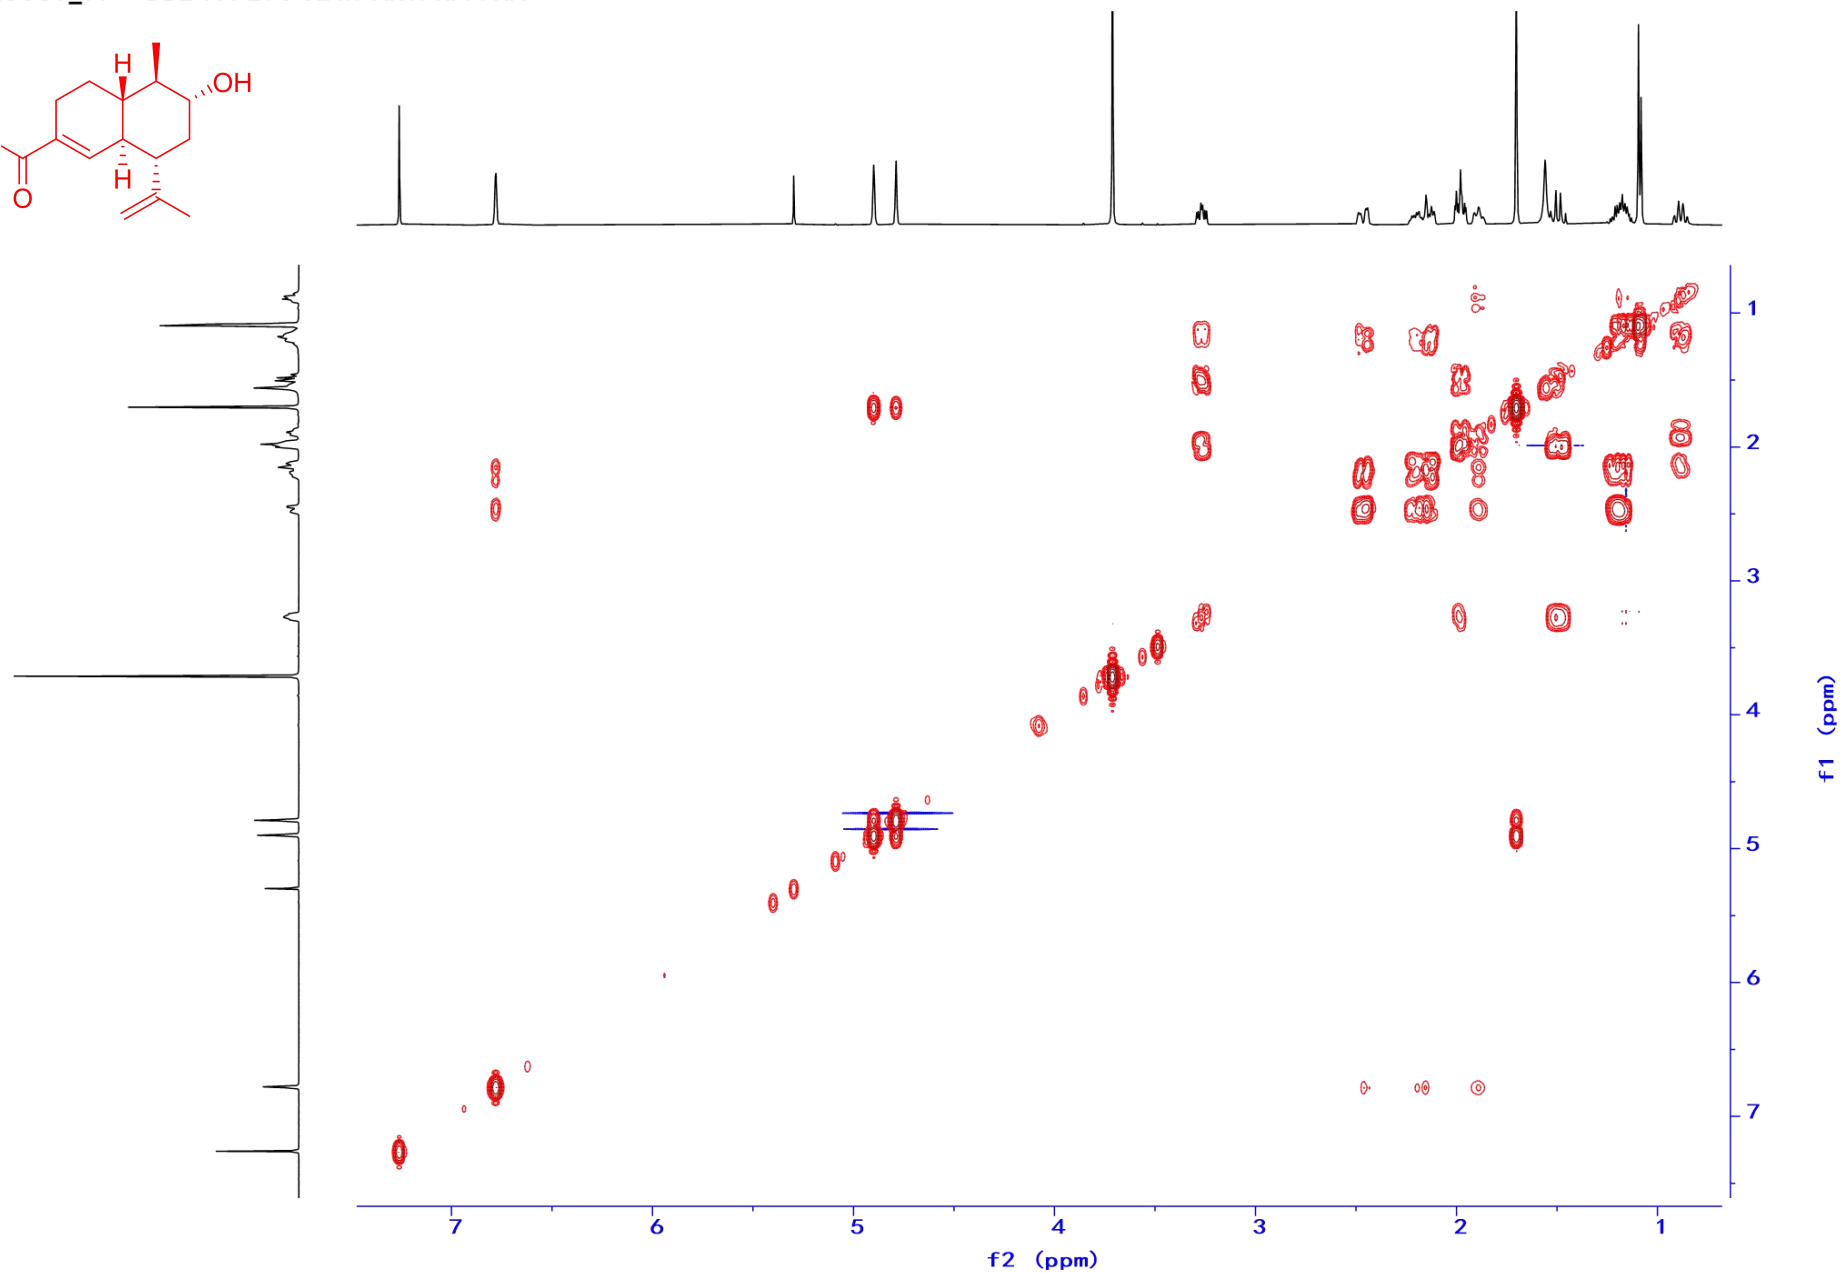

Figure S37. The  $^1\text{H}$ - $^1\text{H}$  COSY Spectrum of Compound 4 in  $\text{CDCl}_3$  (500MHz)

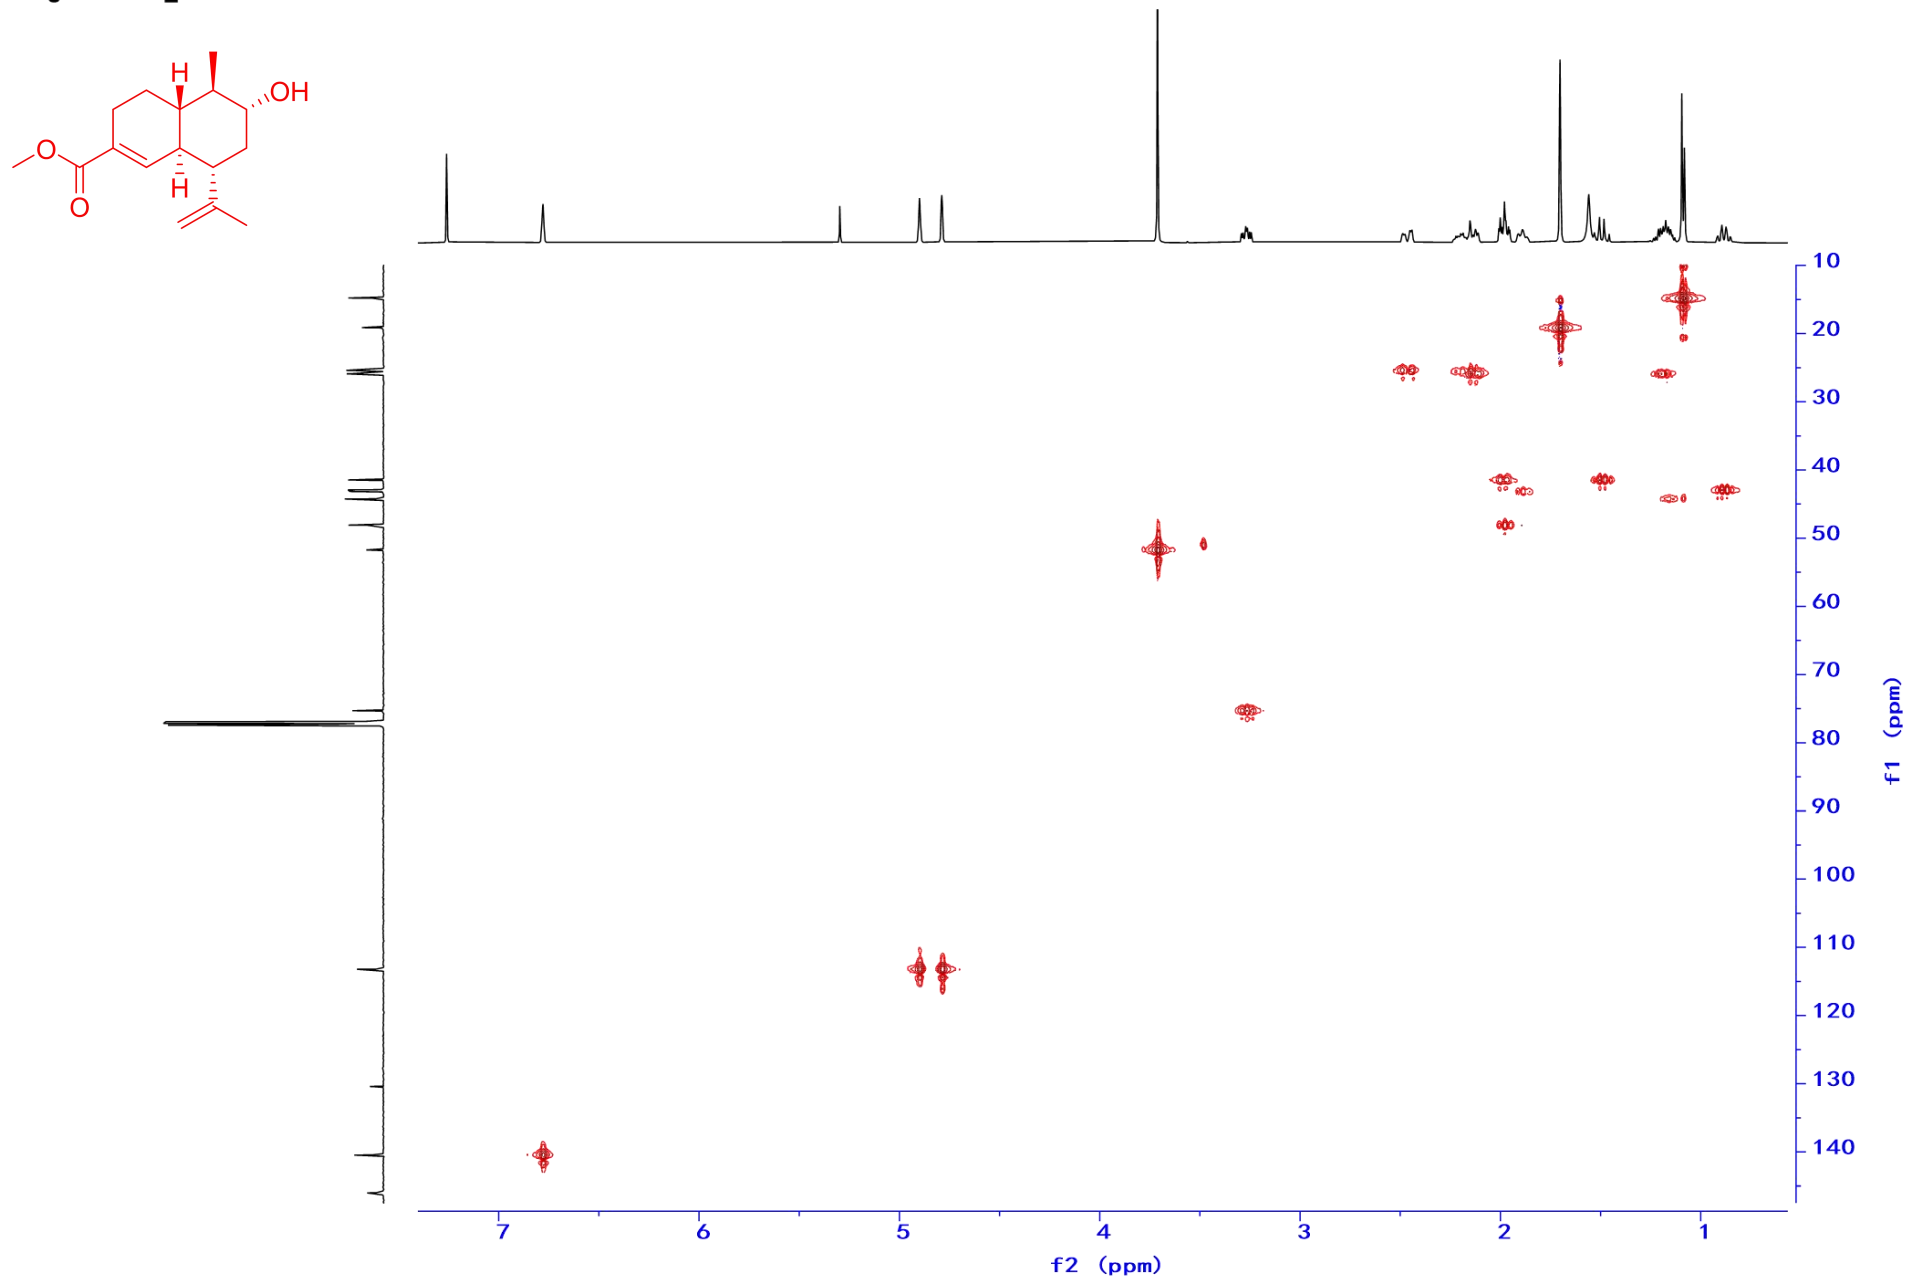

Figure S38. The HSQC Spectrum of Compound 4 in  $\text{CDCl}_3$  (500MHz)

gHMBCAD\_01 — DD2-500 LYC-8E IN cdcl3 coldprobe-Probe —

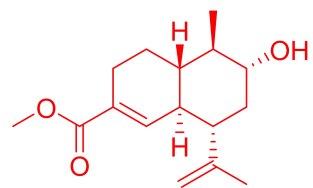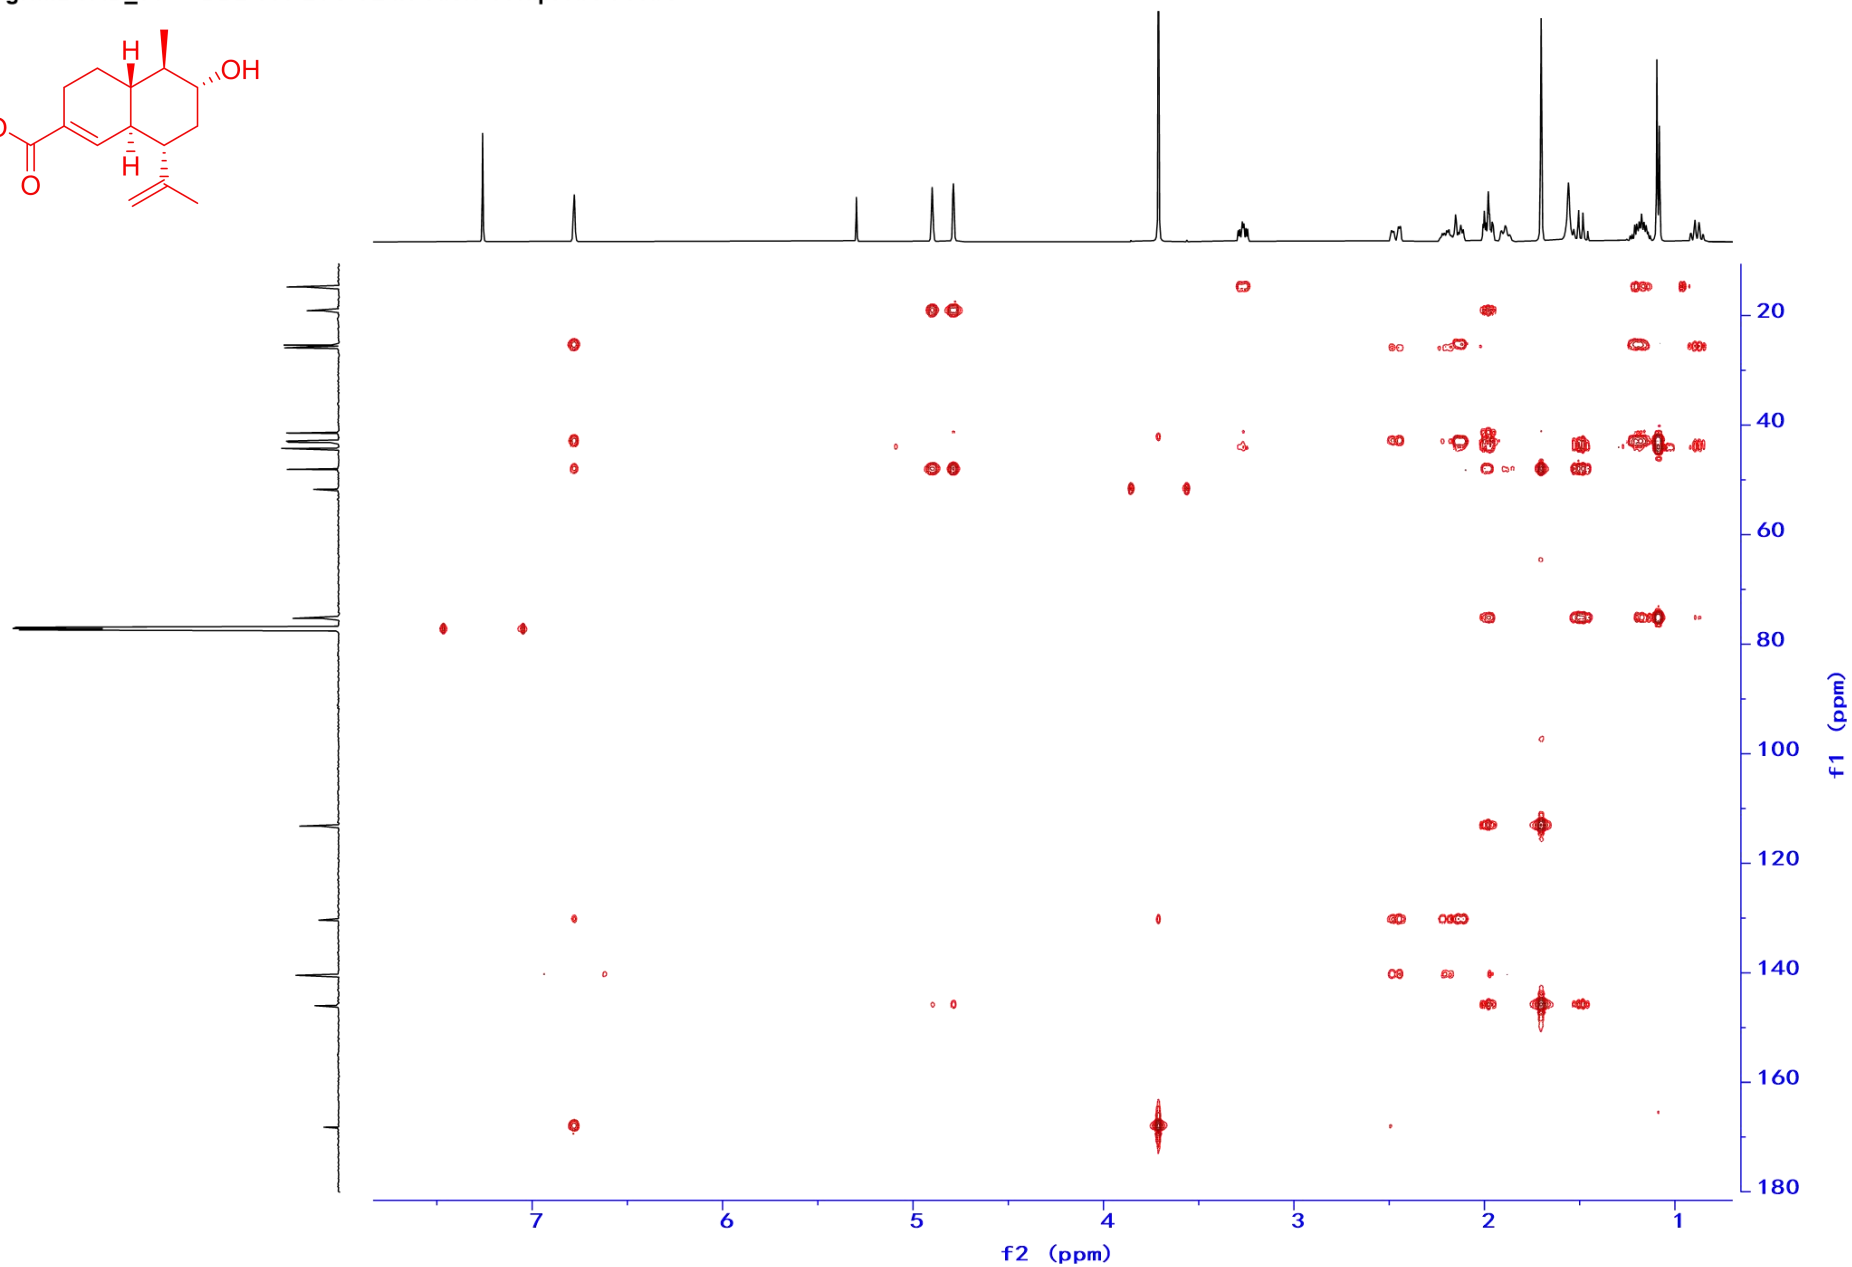

Figure S39. The HMBC Spectrum of Compound 4 in CDCl<sub>3</sub> (500MHz)



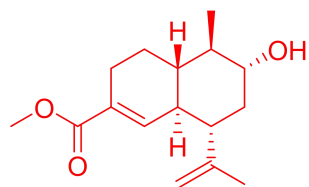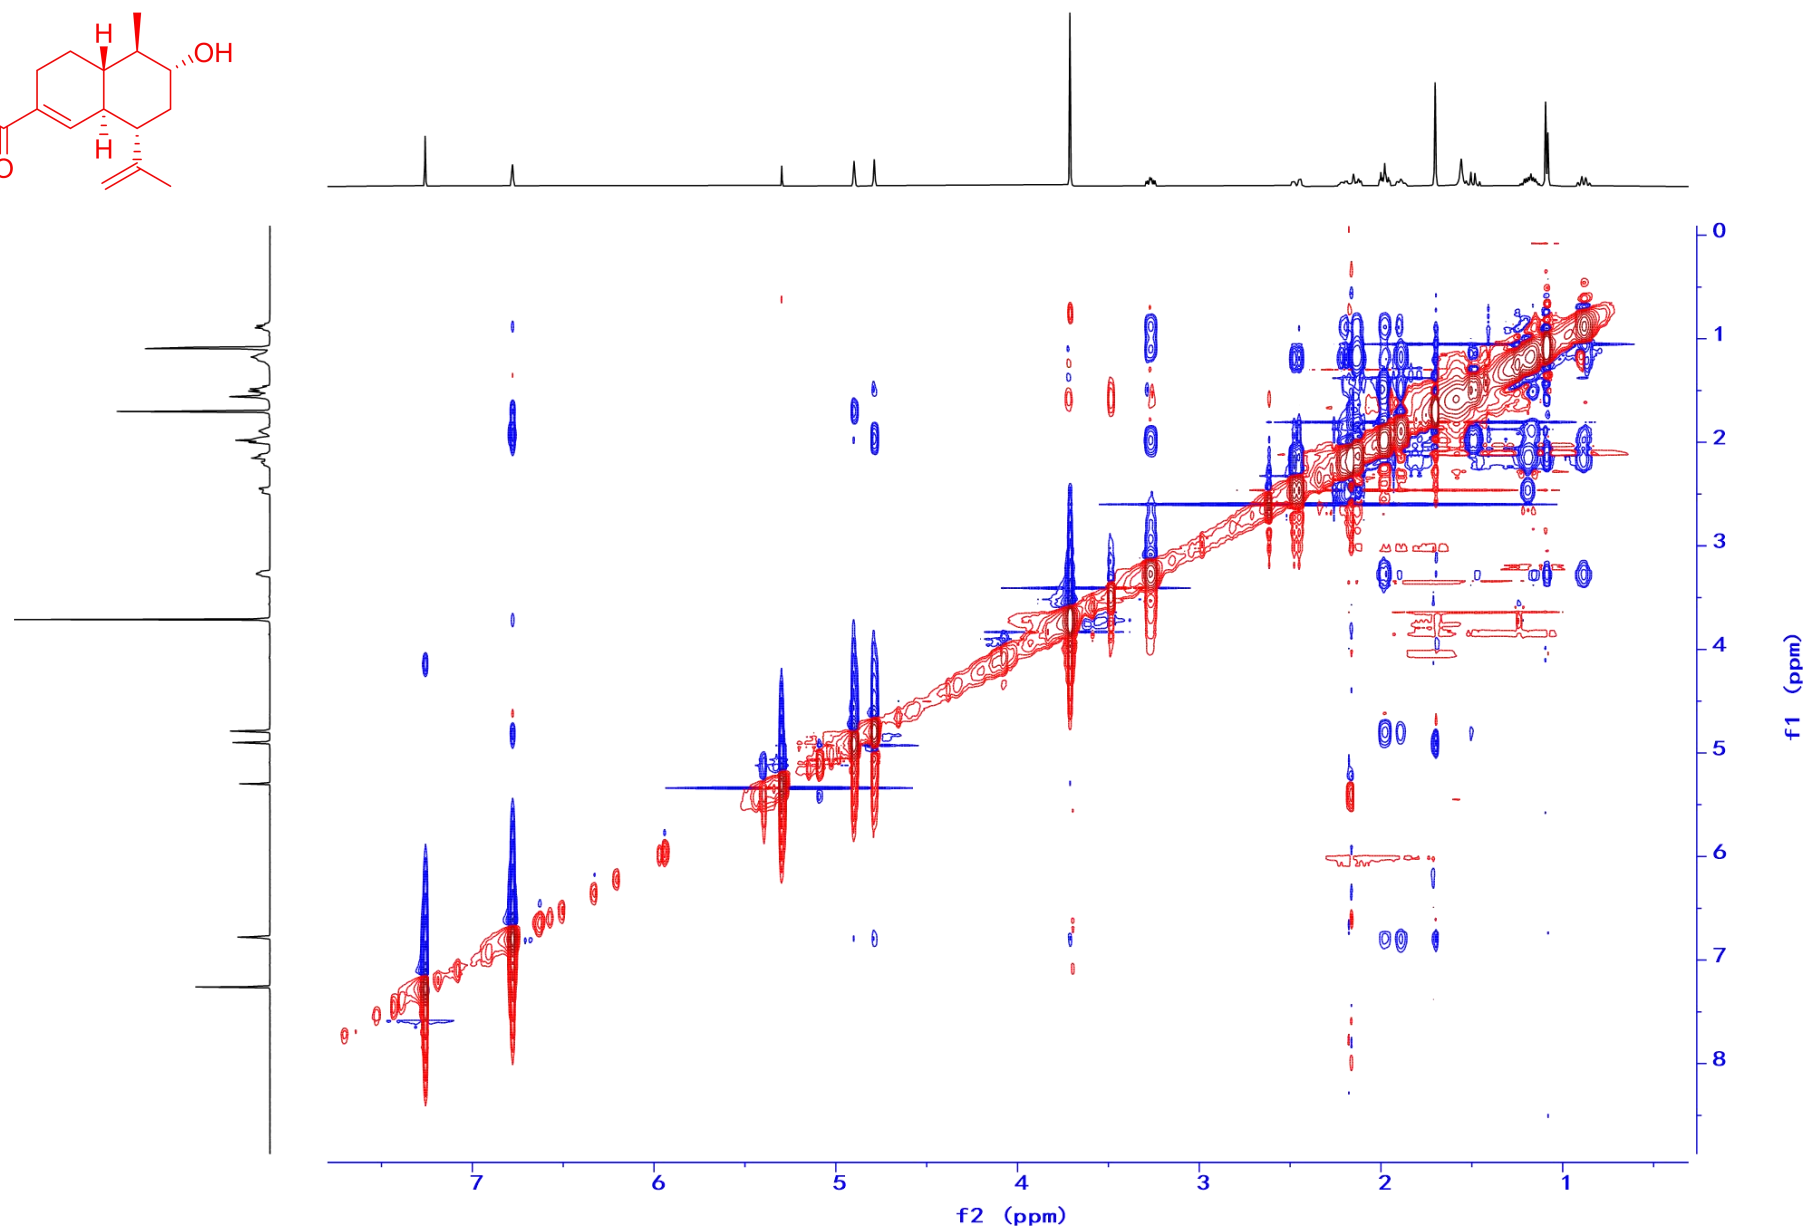

**Figure S40.** The NOESY Spectrum of Compound 4 in CDCl<sub>3</sub> (500MHz)

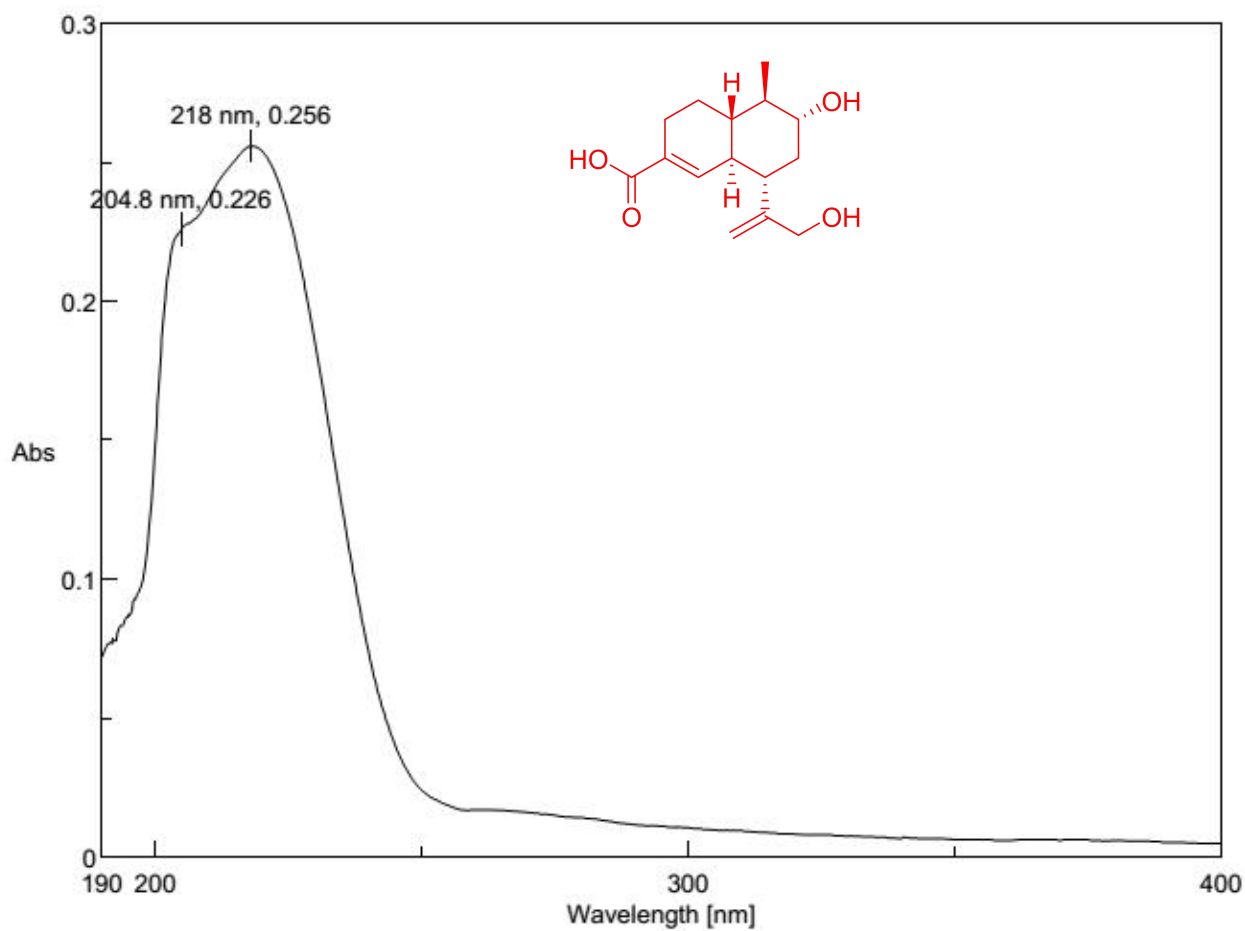

**Figure S41. The UV Spectrum of Compound 5 in MeOH**

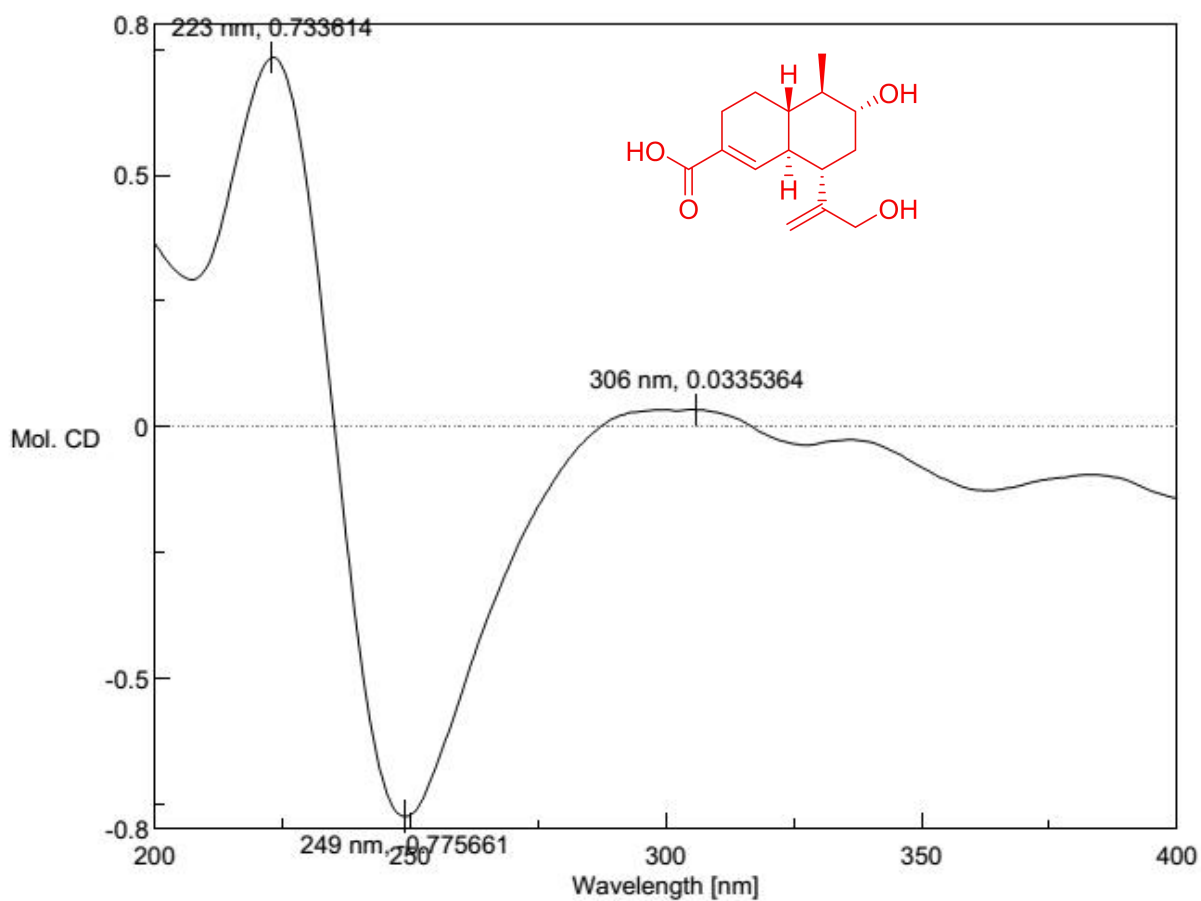

**Figure S42. The CD Spectrum of Compound 5 in MeOH**

# Thermo Qexactive Focus Report

compound NO. : 2WC5

Method : LCMS(compound)-low

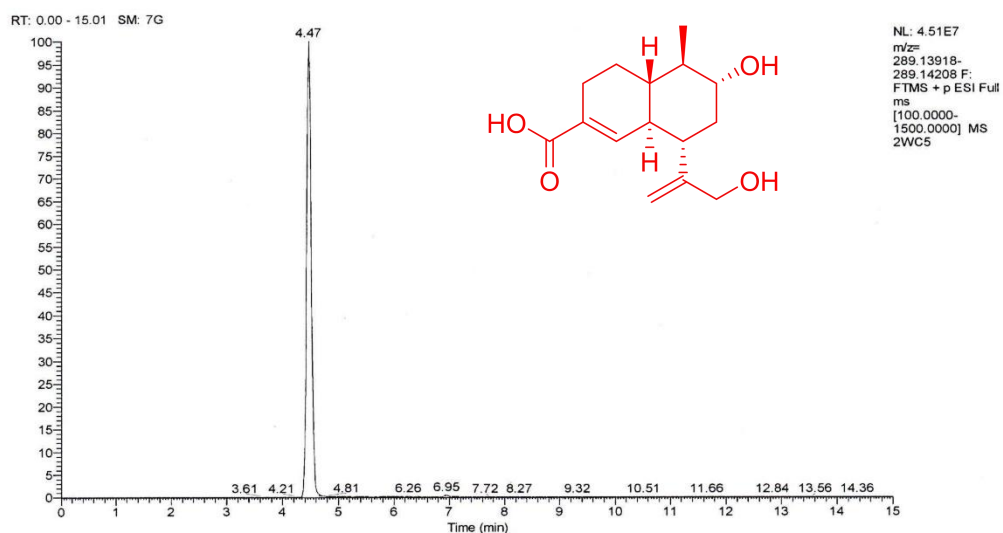

2WC5 #447 RT: 4.47 AV: 1 NL: 5.52E7  
T: FTMS + p ESI Full ms [100.0000-1500.0000]  
289.14063

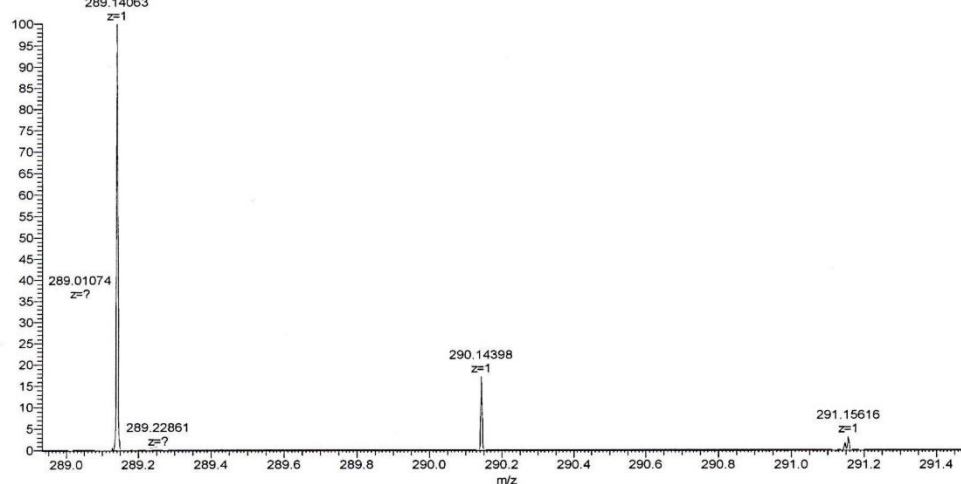

| m/z       | Theo. Mass | Delta (ppm) | RDB equiv. | Composition   |      |
|-----------|------------|-------------|------------|---------------|------|
| 289.14063 | 289.14103  | -1.38       | 4.5        | C15 H22 O4 Na | M+Na |

**Figure S43. The HR-mass Spectrum of Compound 5 in MeOH**

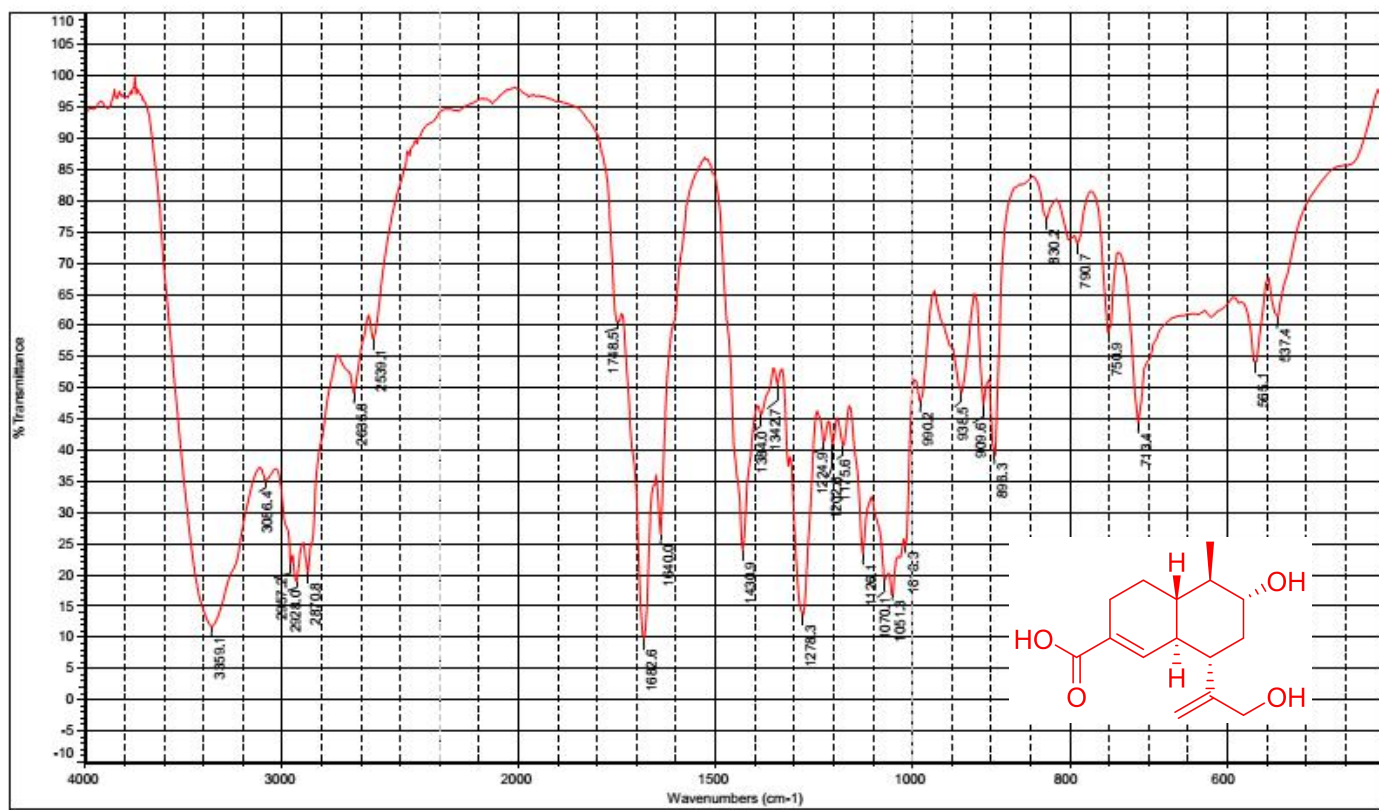

Figure S44. The IR Spectrum of Compound 5

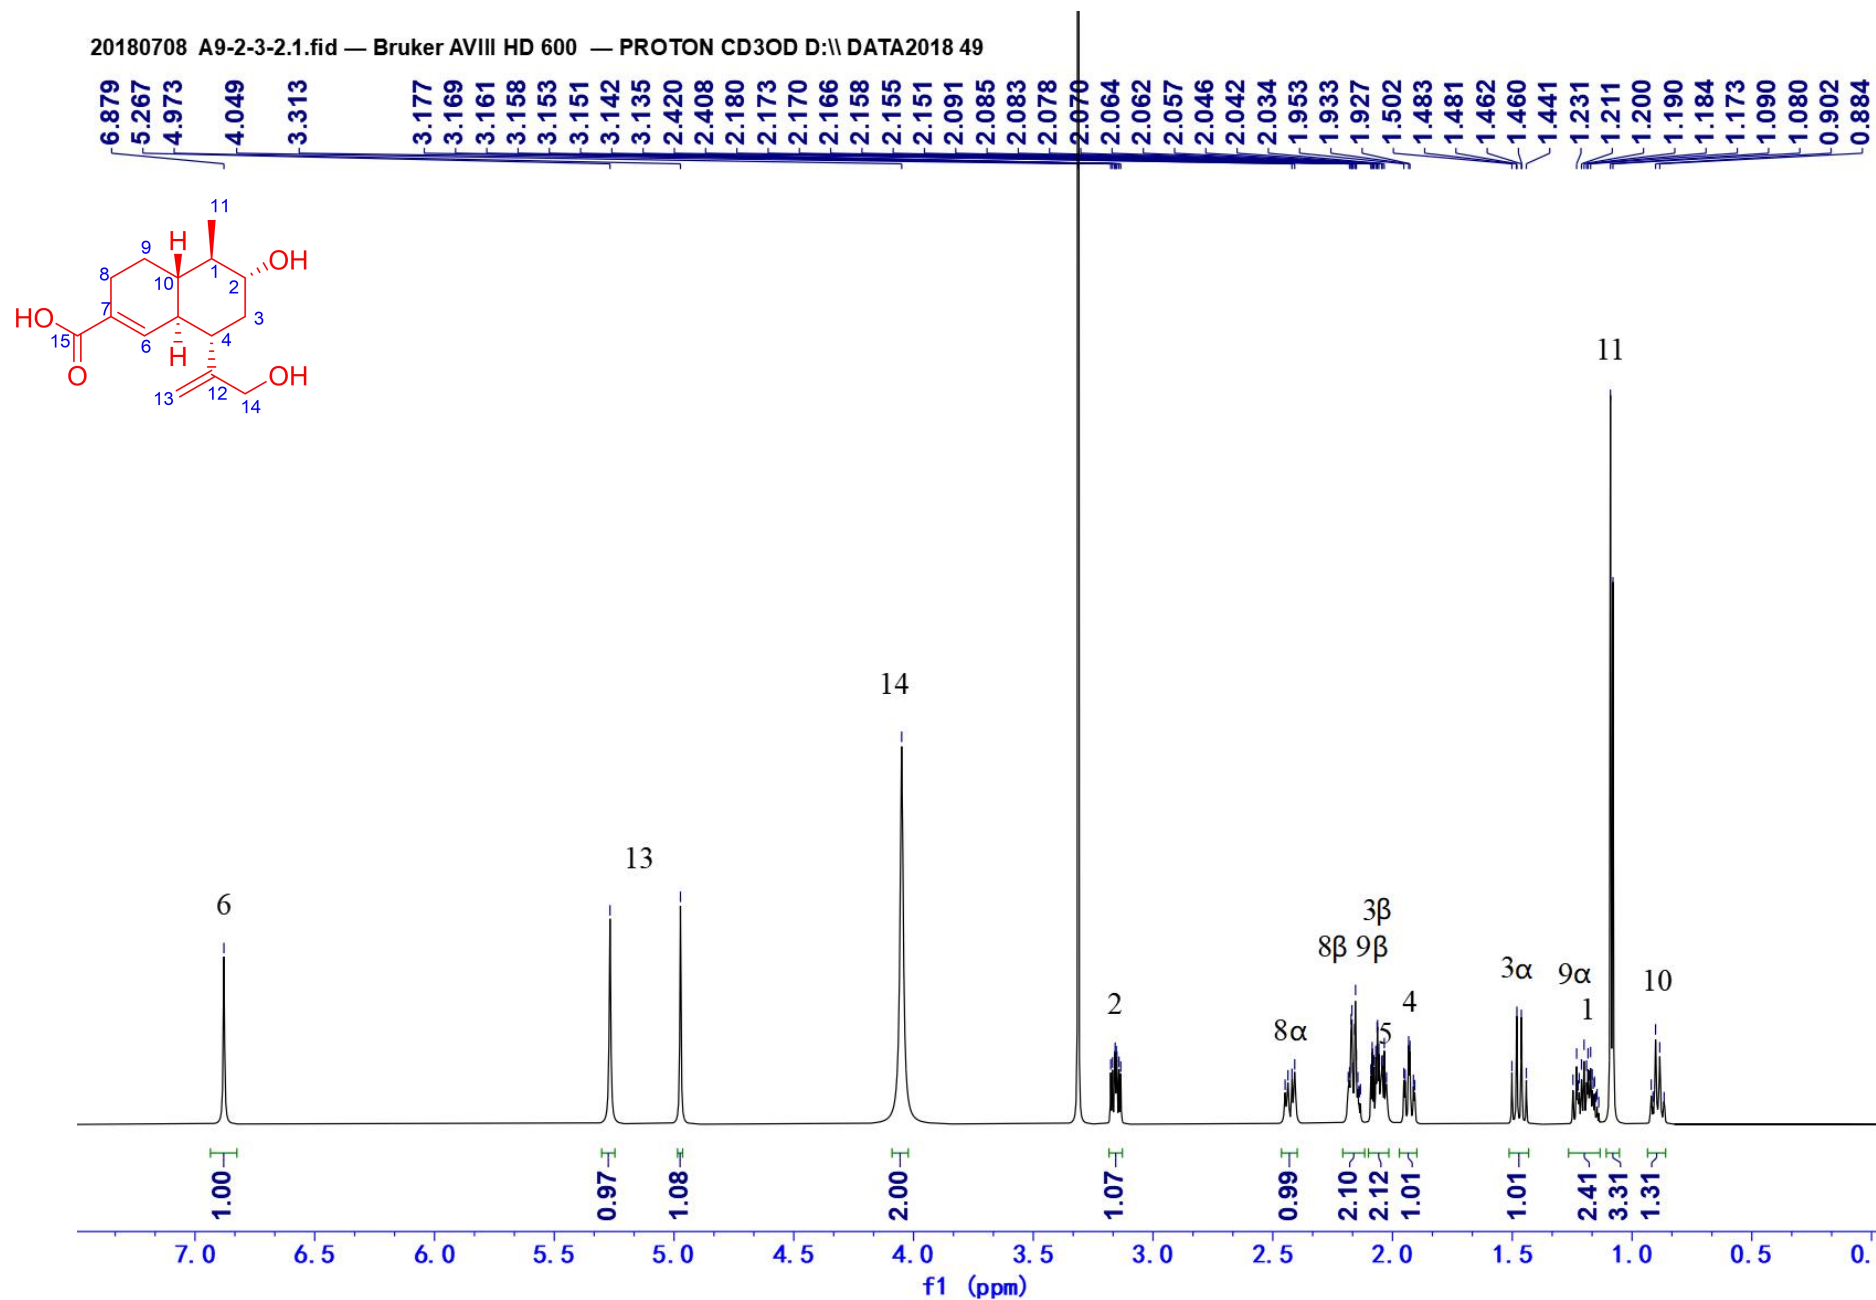

Figure S45. The  $^1\text{H}$  NMR Spectrum of Compound 5 in  $\text{MeOH}-d_4$  (600MHz)

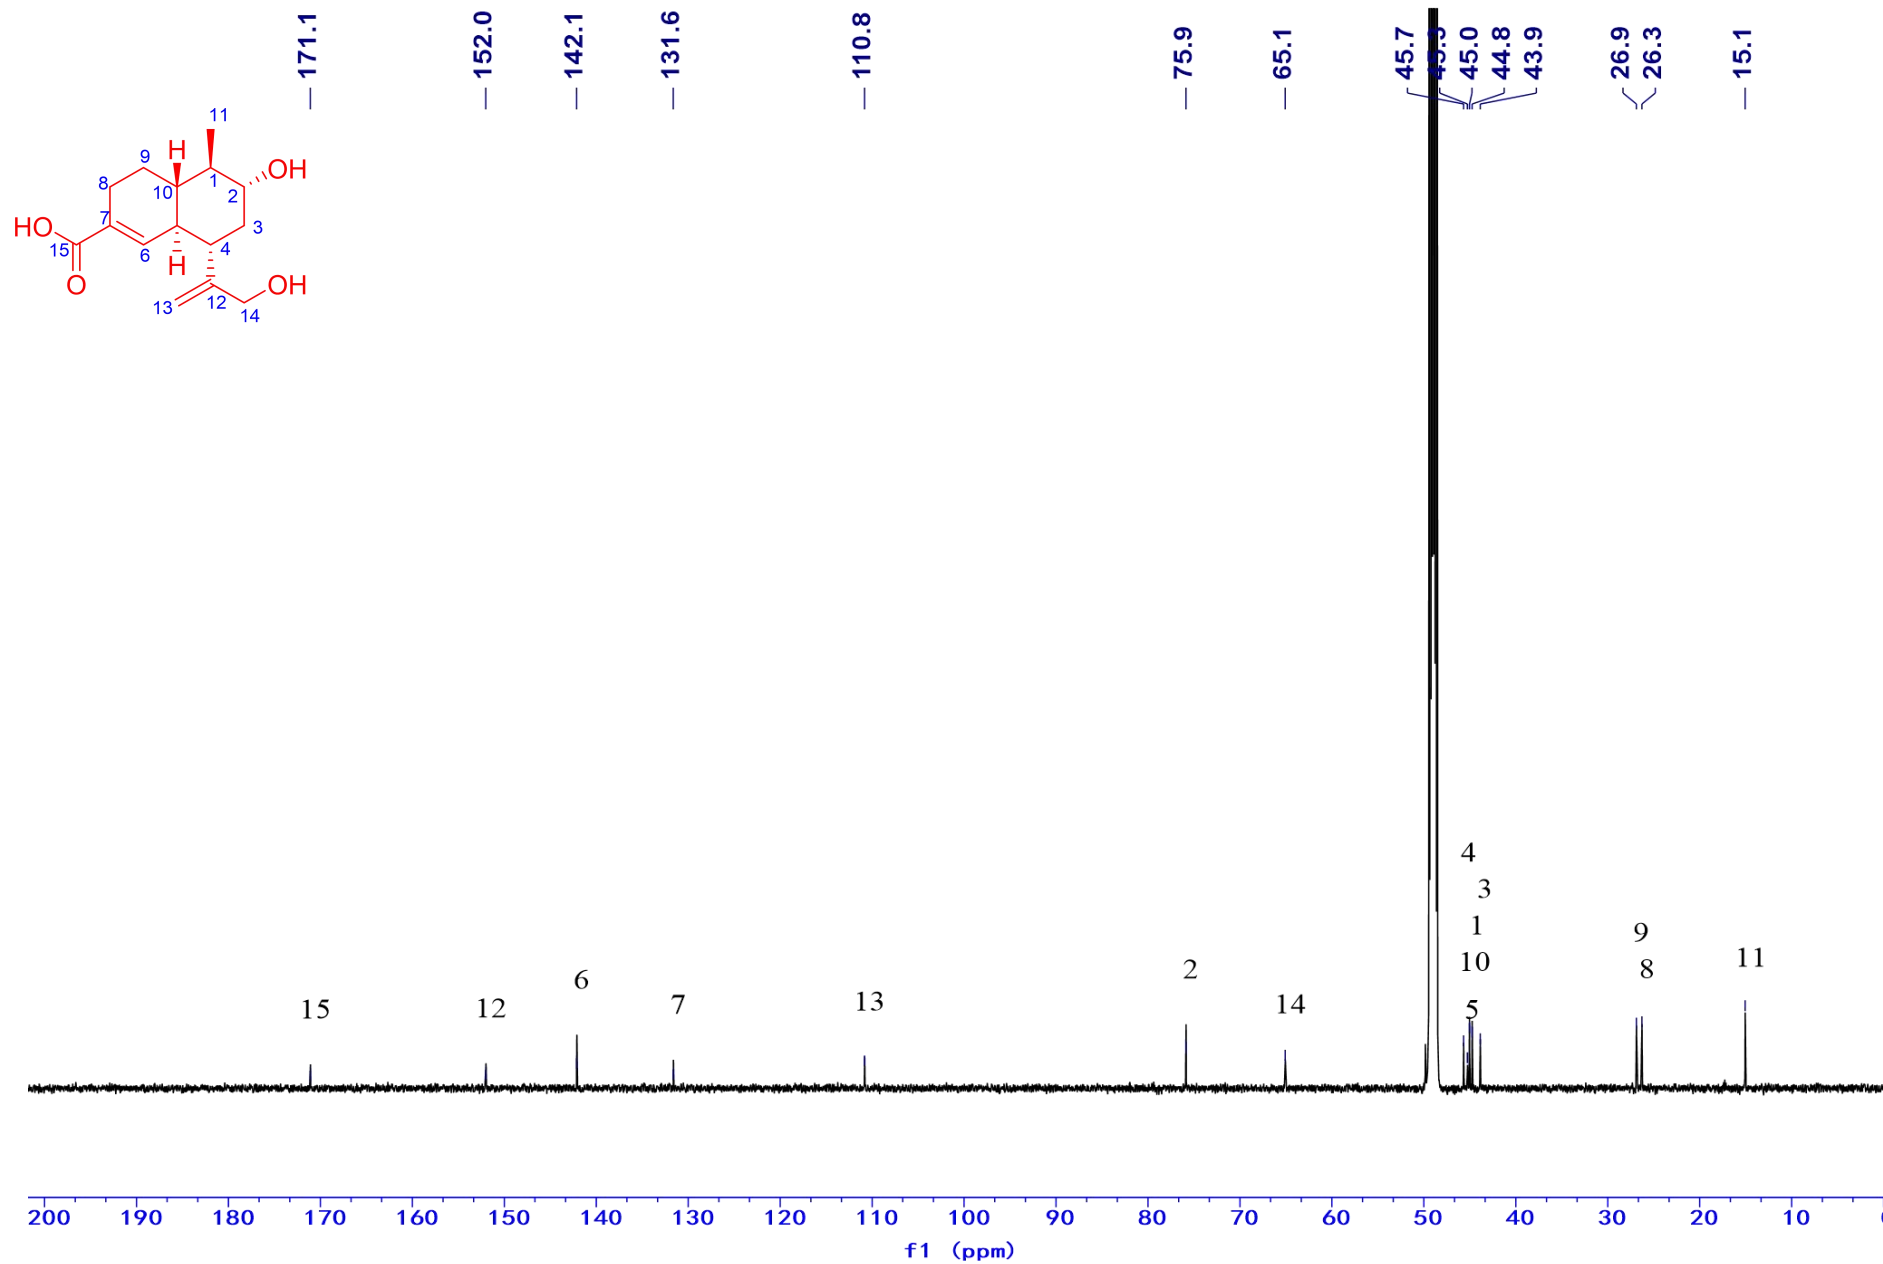

Figure S46. The  $^{13}\text{C}$  NMR Spectrum of Compound 5 in  $\text{MeOH-}d_4$  (150MHz)

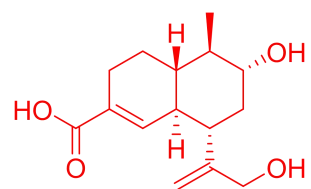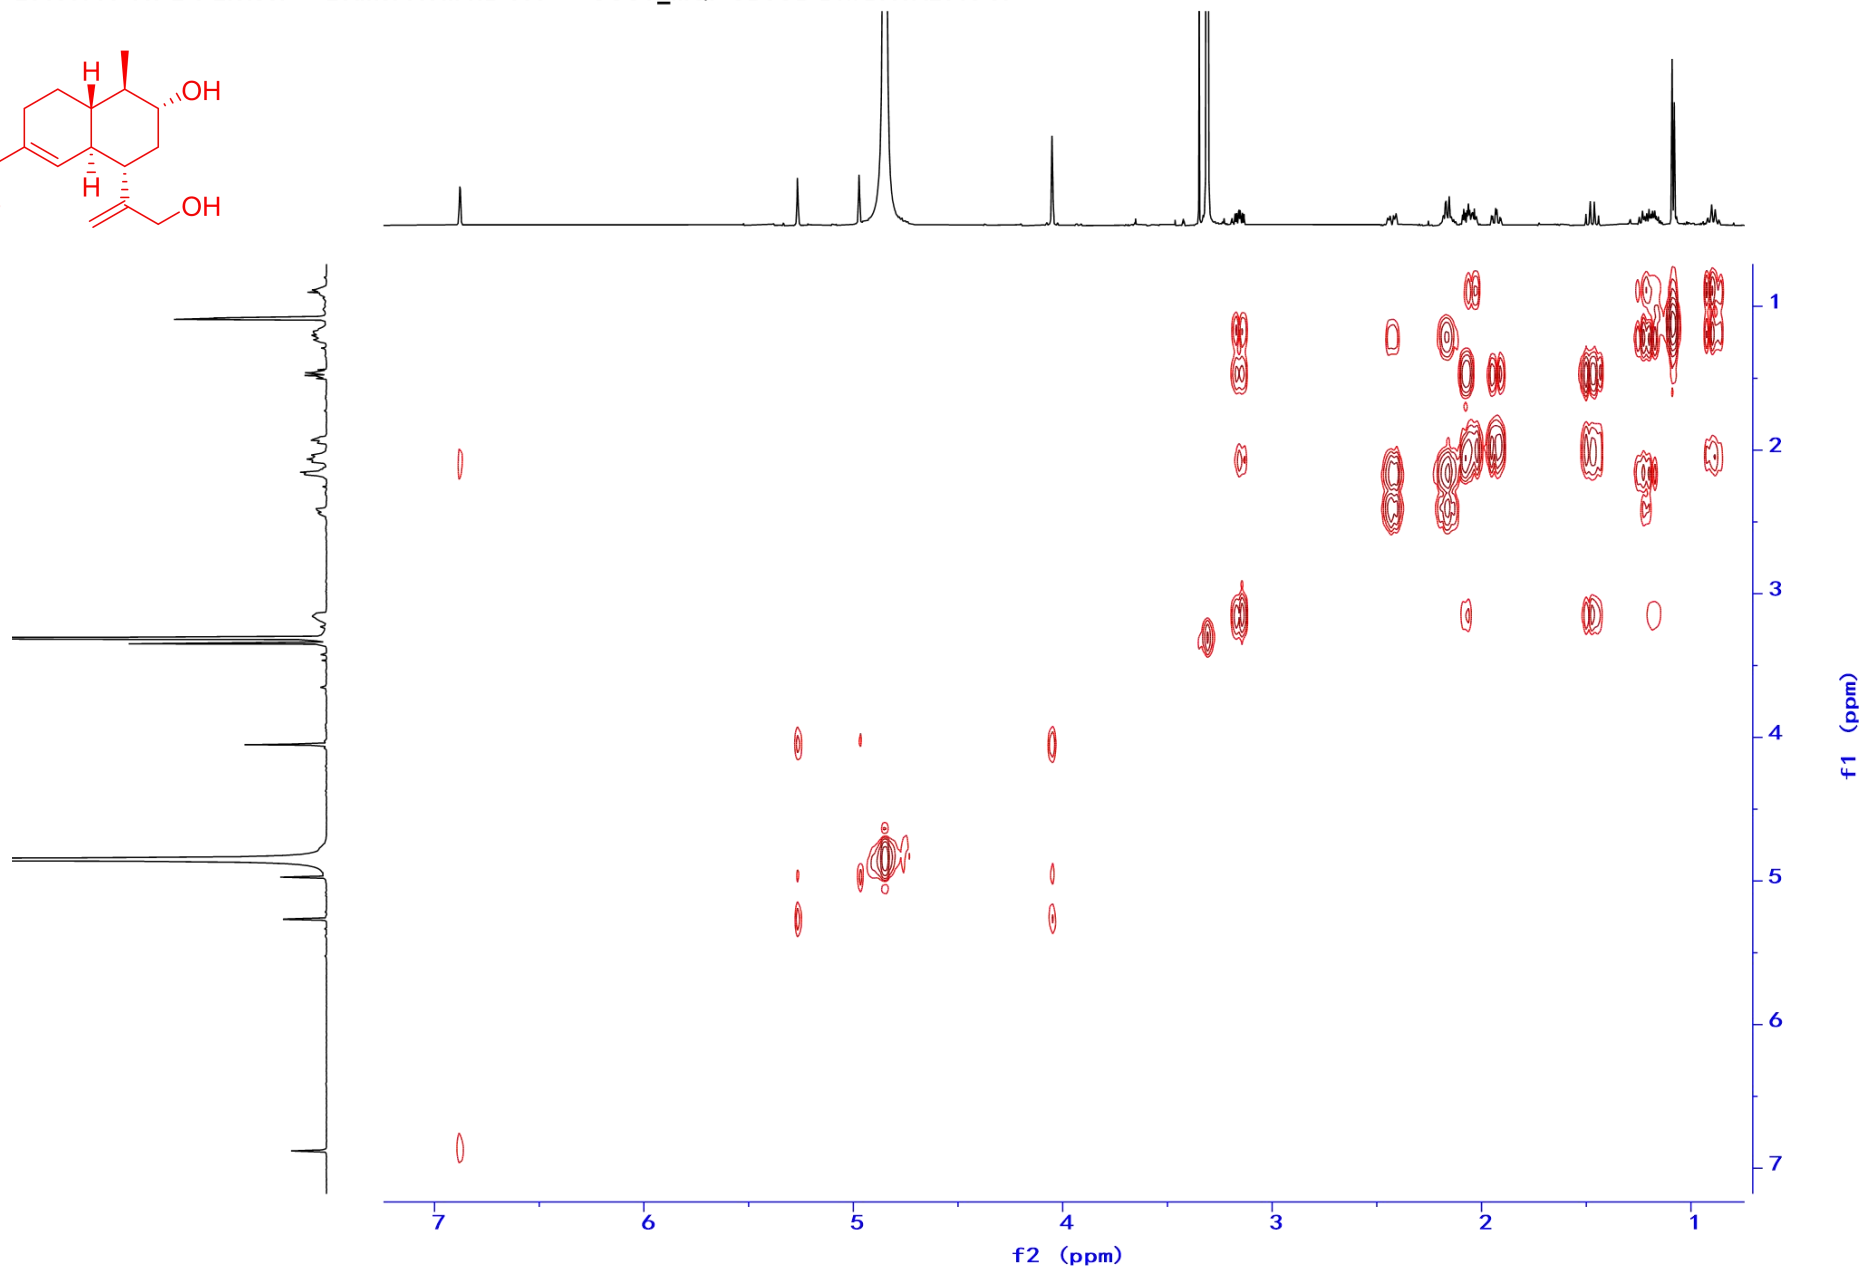

Figure S47. The  $^1\text{H}$ - $^1\text{H}$  COSY Spectrum of Compound 5 in  $\text{MeOH-}d_4$  (600MHz)

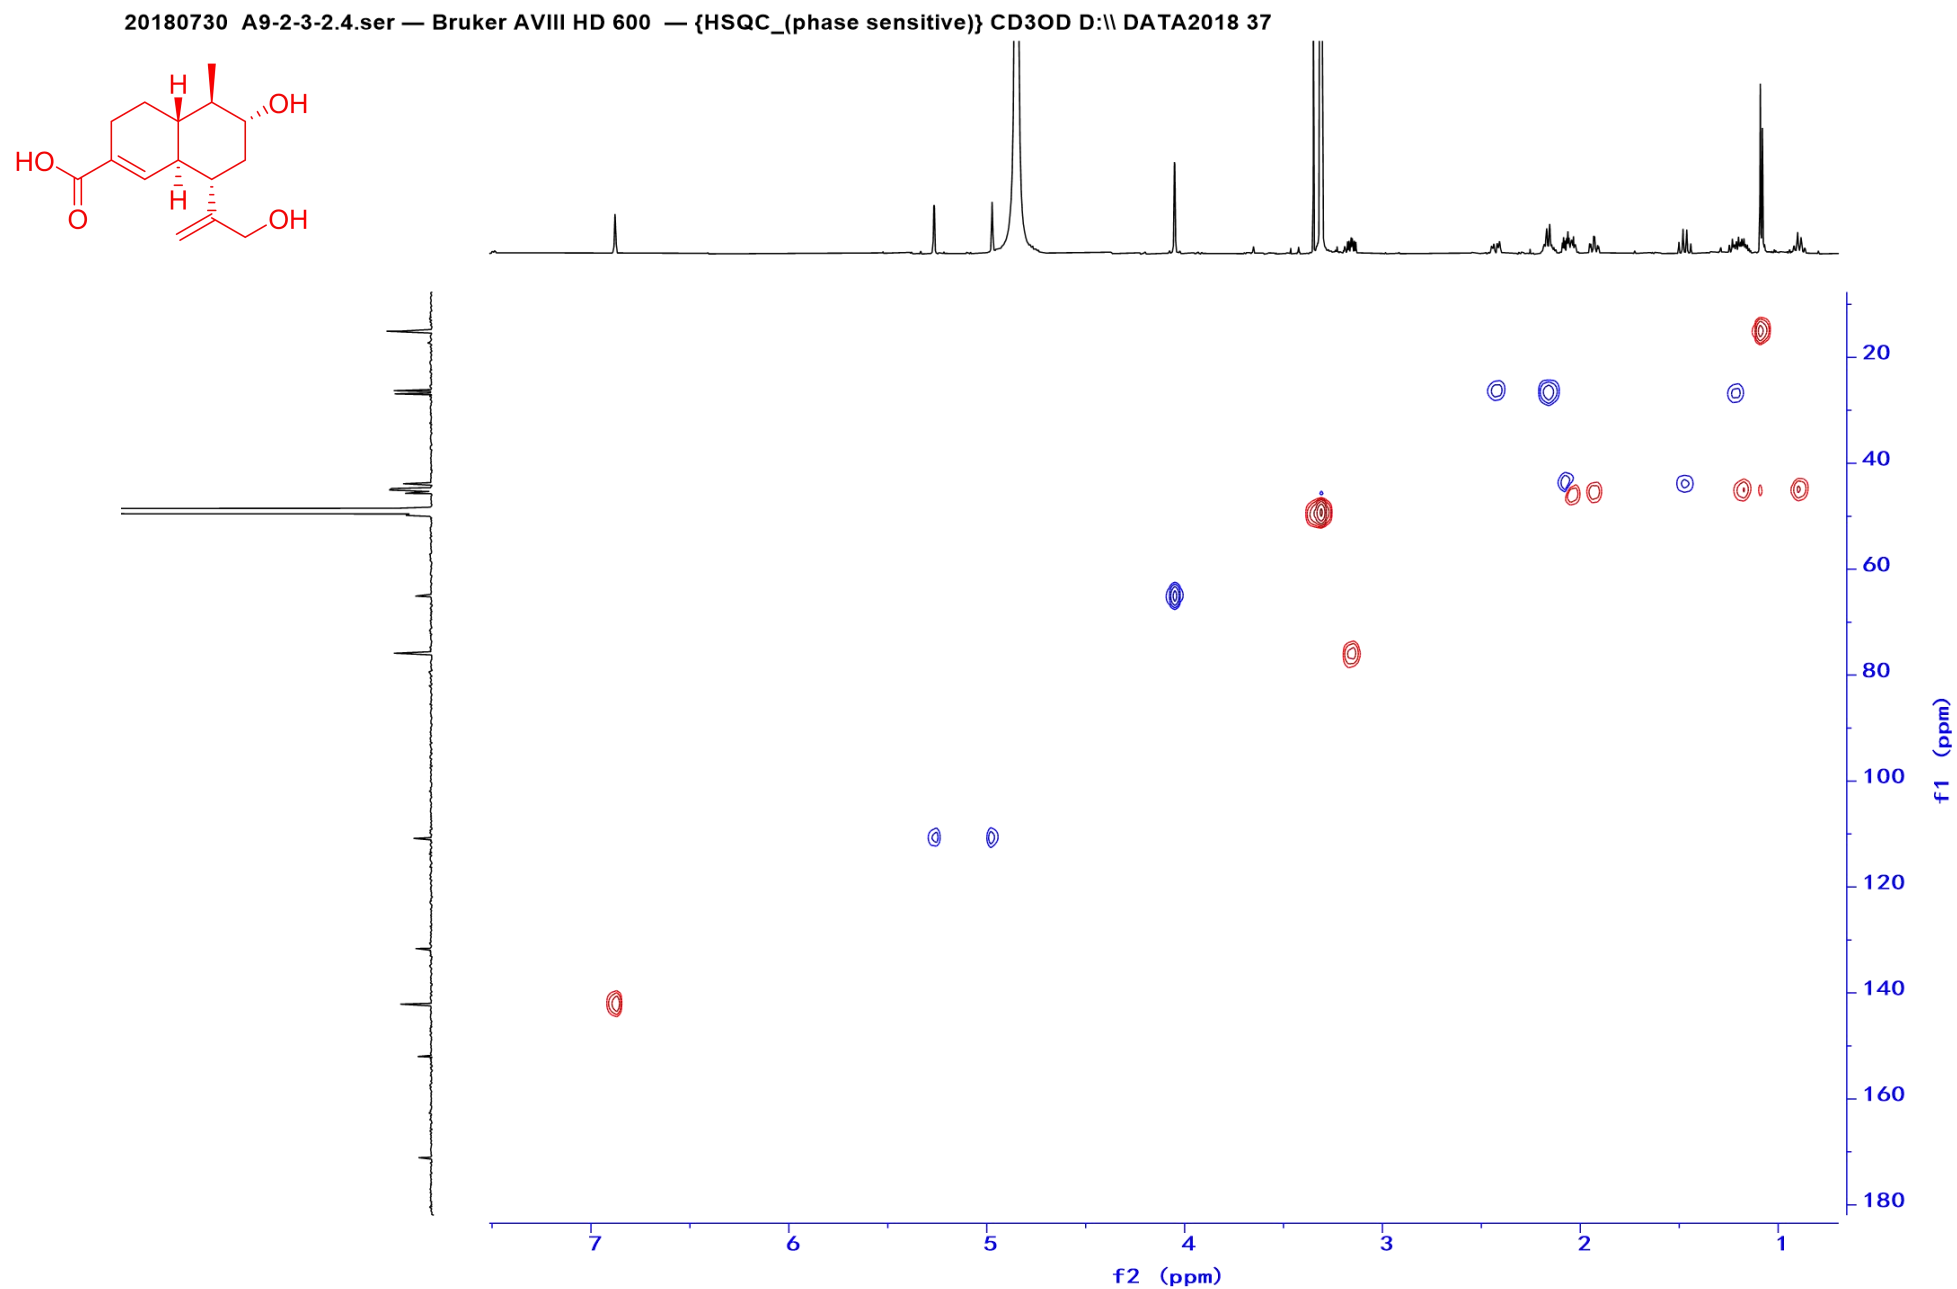

**Figure S48.** The HSQC Spectrum of Compound 5 in MeOH-*d*<sub>4</sub> (600MHz)



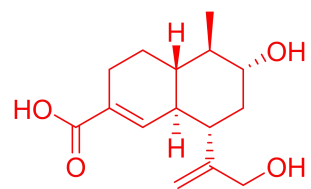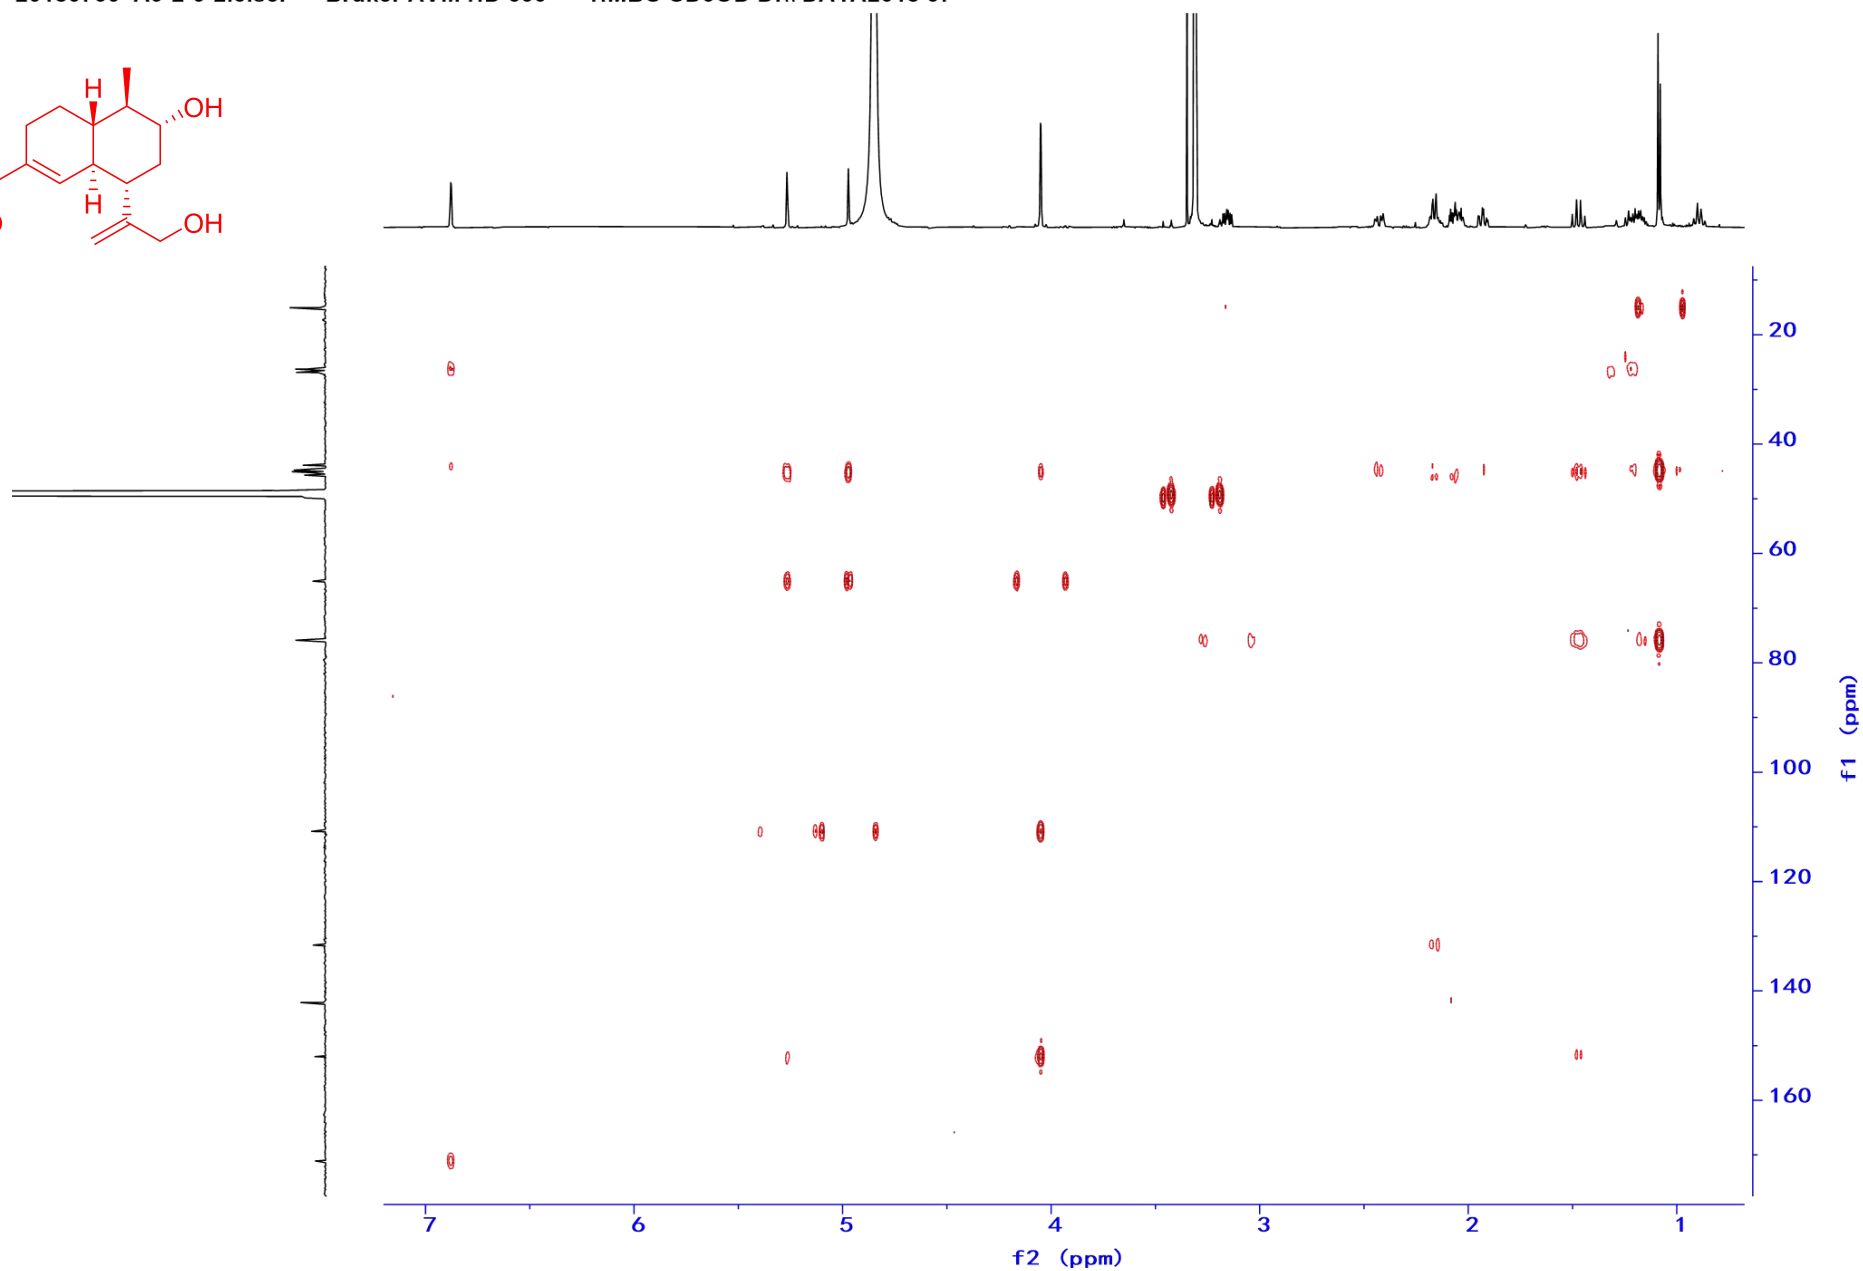

**Figure S49. The HMBC Spectrum of Compound 5 in MeOH-*d*<sub>4</sub> (600MHz)**

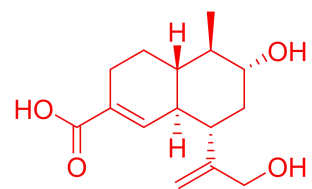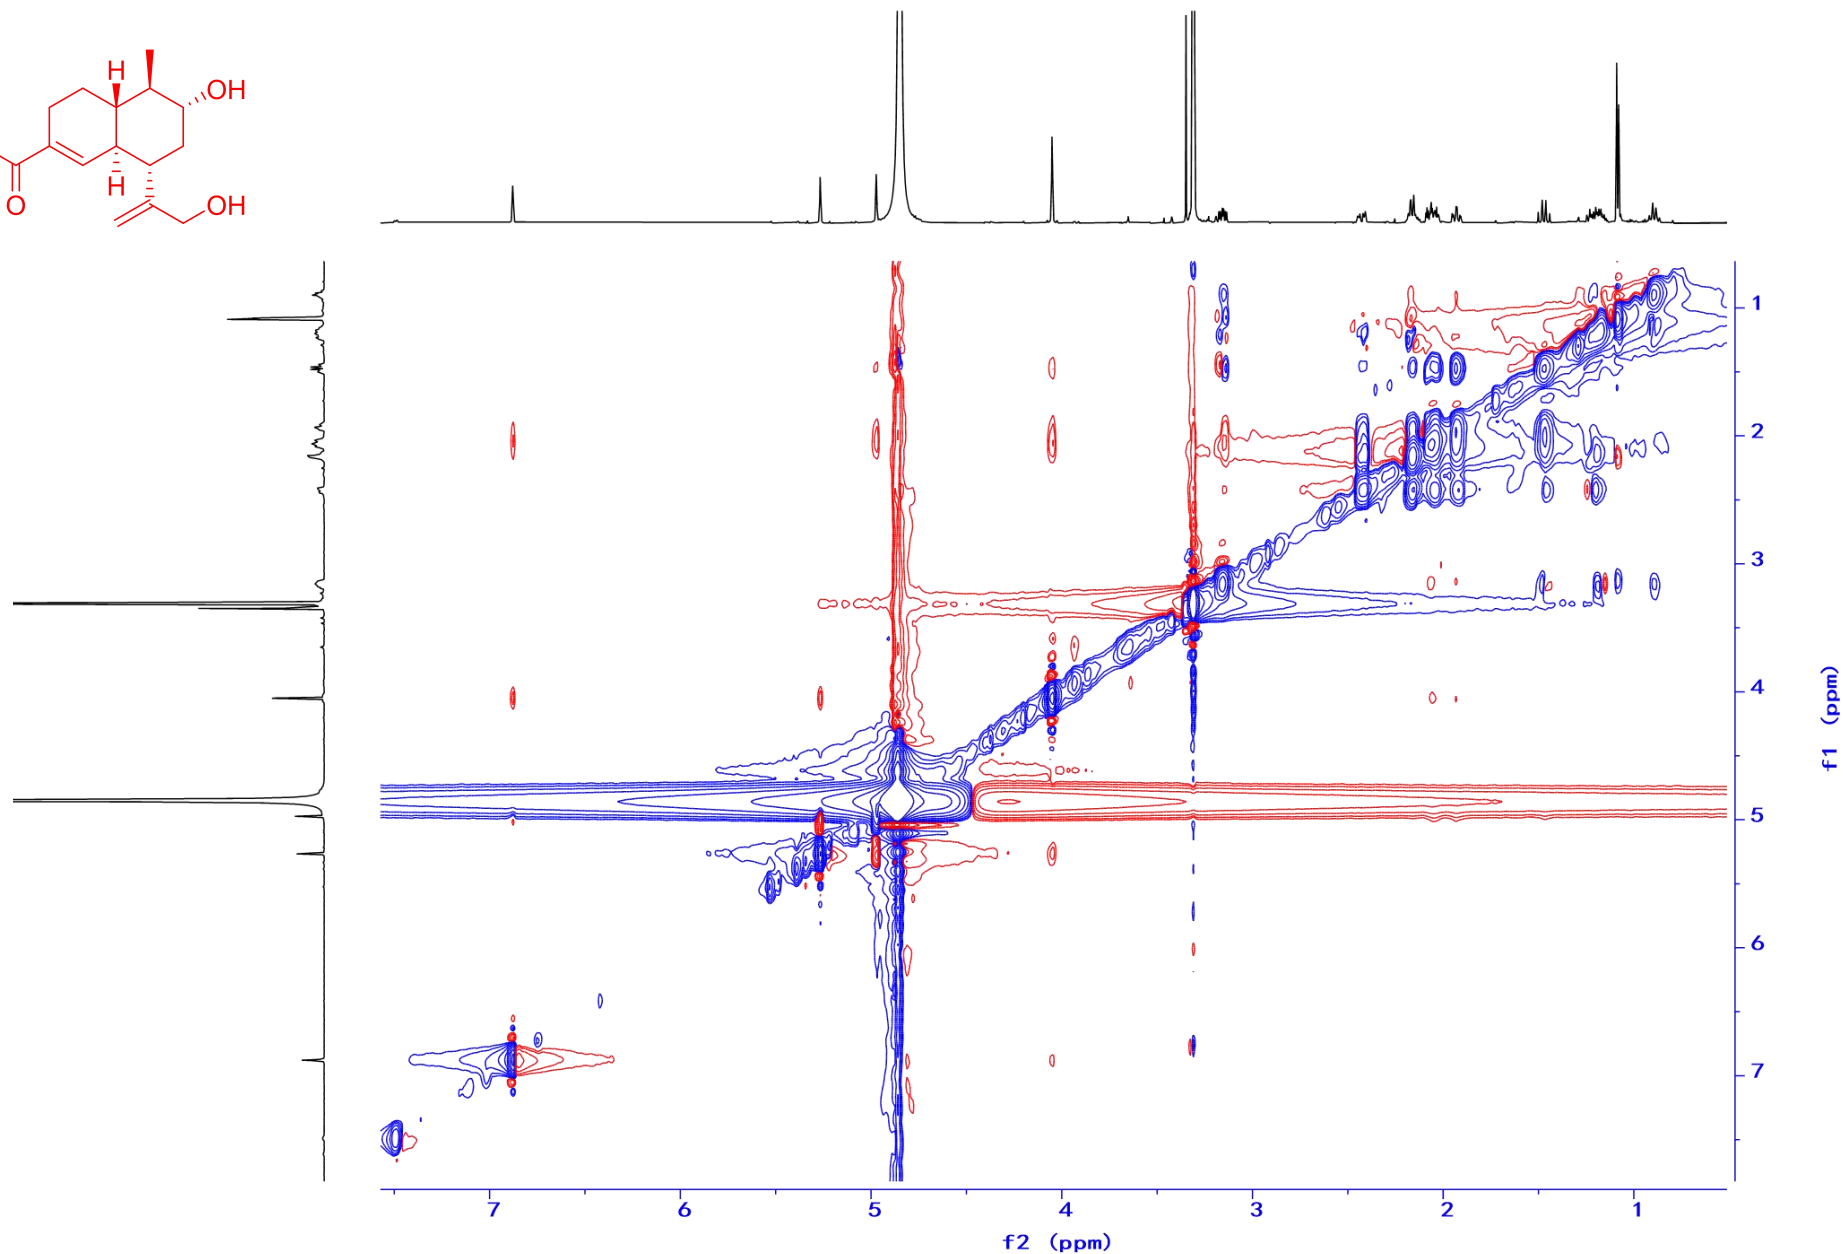

Figure S50. The NOESY Spectrum of Compound 5 in MeOH- $d_4$  (600MHz)

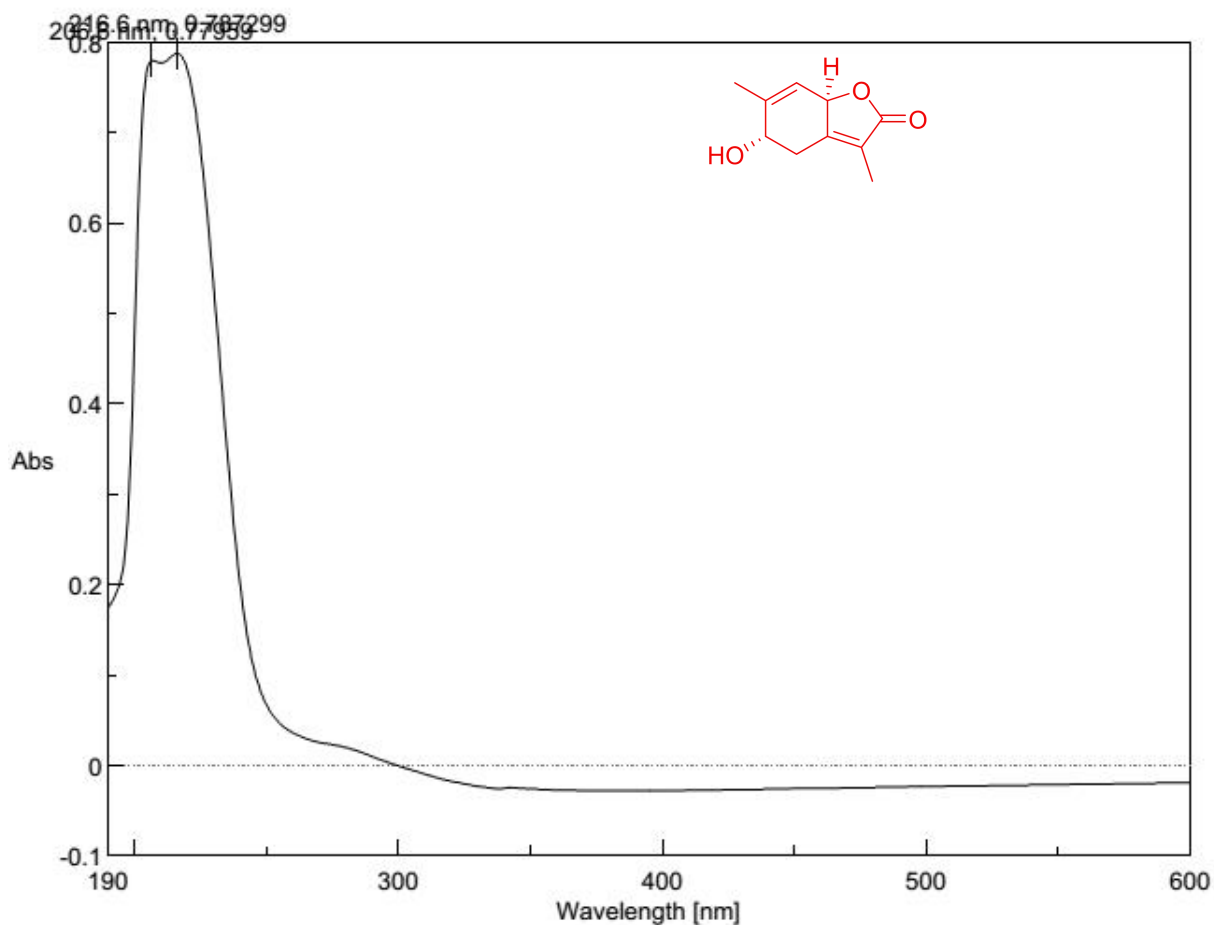

**Figure S51. The UV Spectrum of Compound 7 in MeOH**

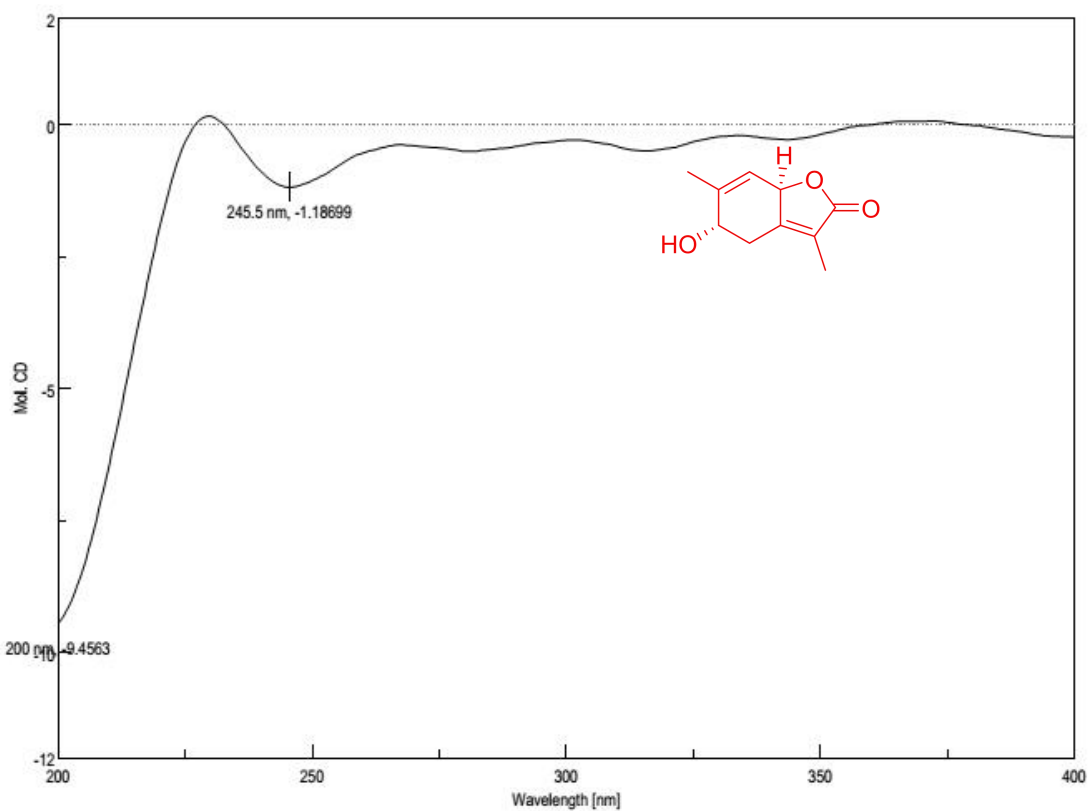

**Figure S52. The CD Spectrum of Compound 7 in MeOH**

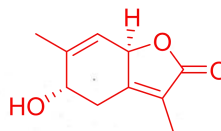

compound NO. : C-2JF-21  
Method : LCMS(compound)-low

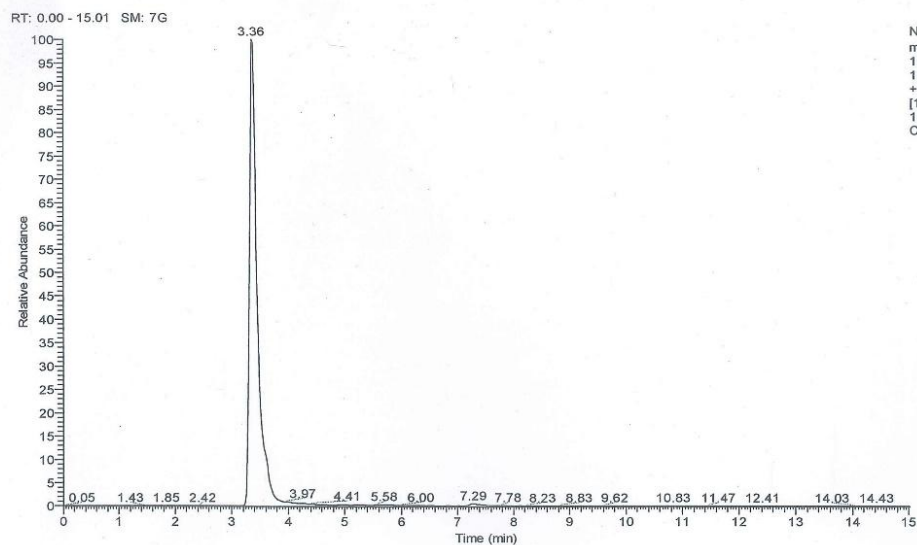

NL: 9.01E7  
m/z= 181.08501-  
181.08683 F: FTMS  
+ p ESI Full ms  
[100.0000-  
1500.0000] MS  
C-2JF-21

C-2JF-21 #339 RT: 3.36 AV: 1 NL: 1.02E8  
T: FTMS + p ESI Full ms [100.0000-1500.0000]  
181.08592

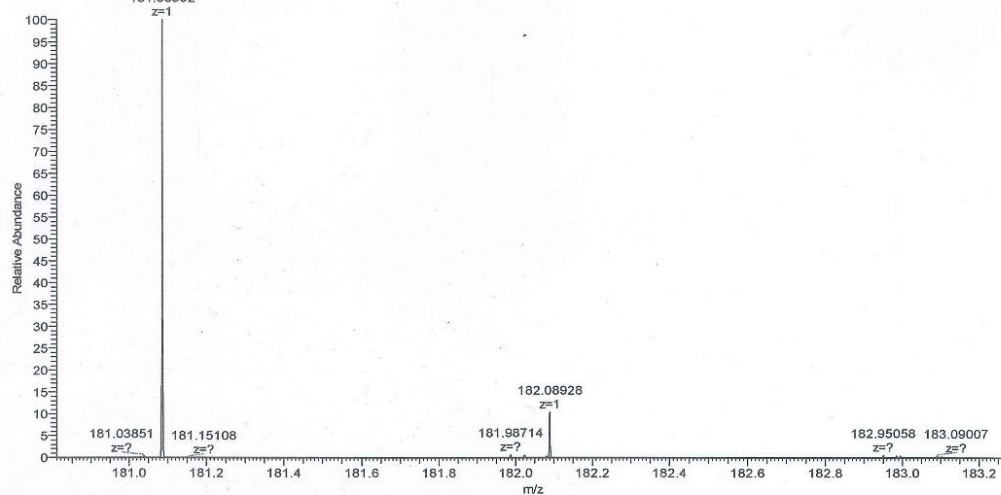

| m/z       | Theo. Mass | Delta (ppm) | RDB equiv. | Composition |     |
|-----------|------------|-------------|------------|-------------|-----|
| 181.08592 | 181.08592  | 0           | 4.5        | C10 H13 O3  | M+H |

**Figure S53. The HR-mass Spectrum of Compound 7 in MeOH**

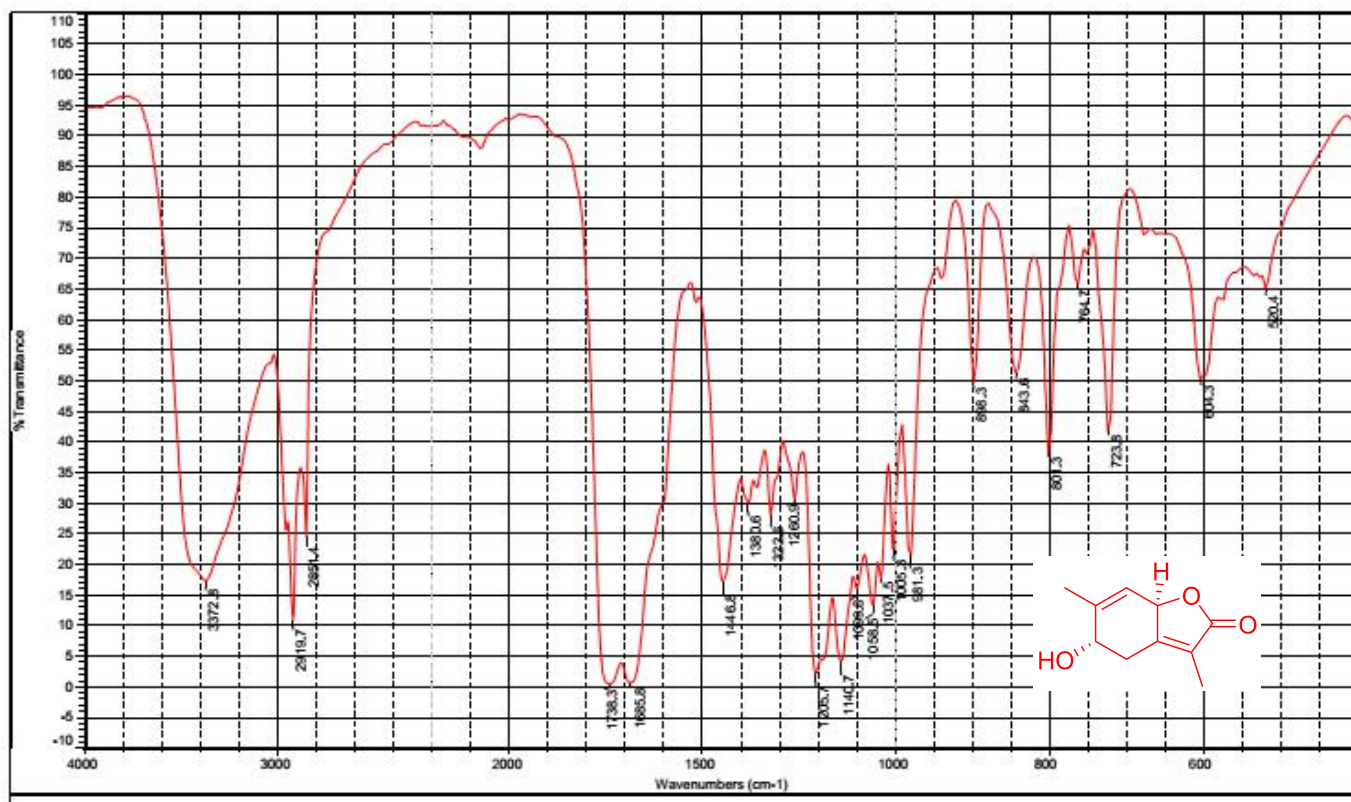

**Figure S54. The IR Spectrum of Compound 7**

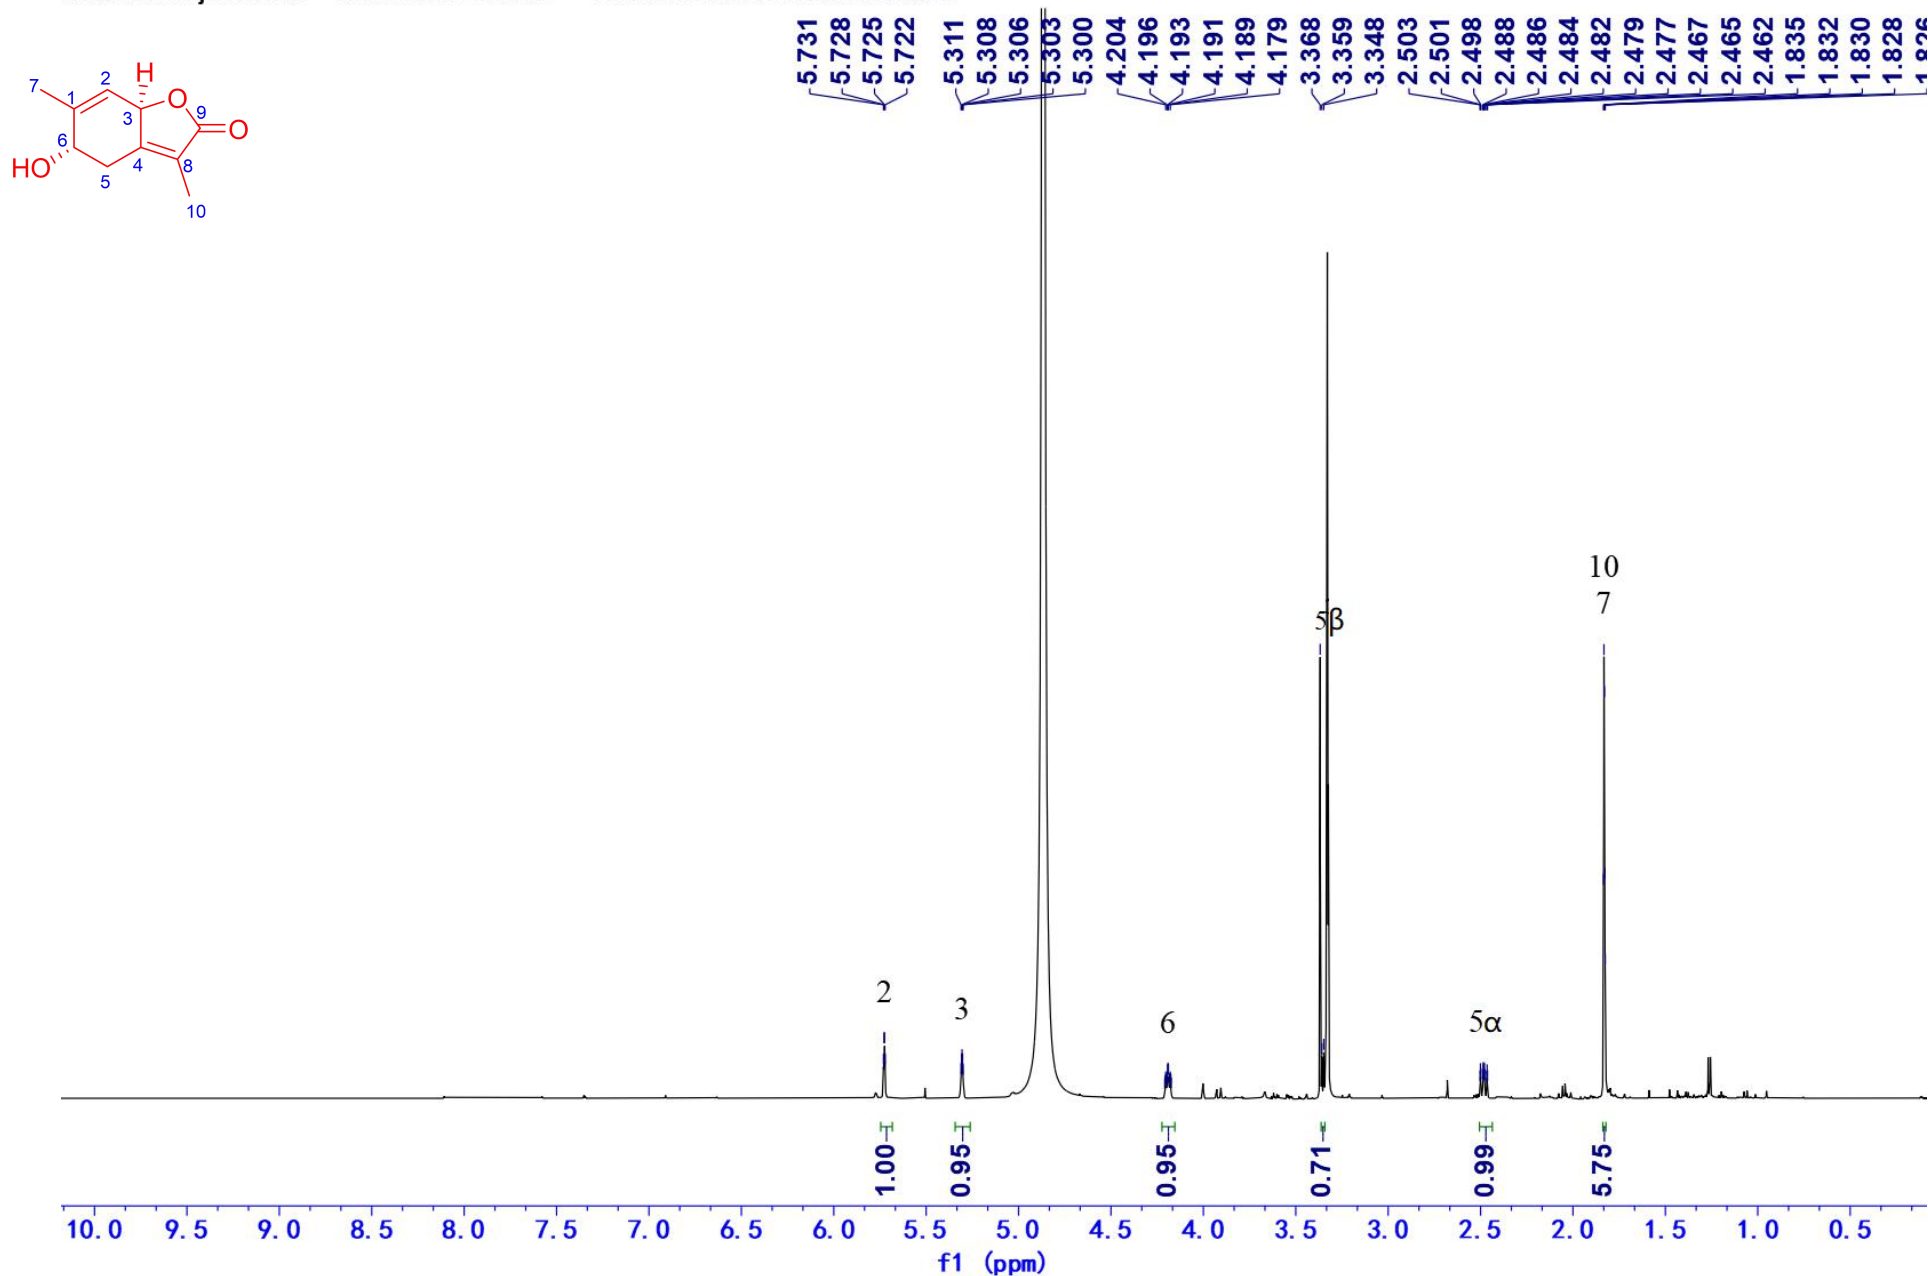

Figure S55. The  $^1\text{H}$  NMR Spectrum of Compound 7 in  $\text{MeOH-}d_4$  (600MHz)

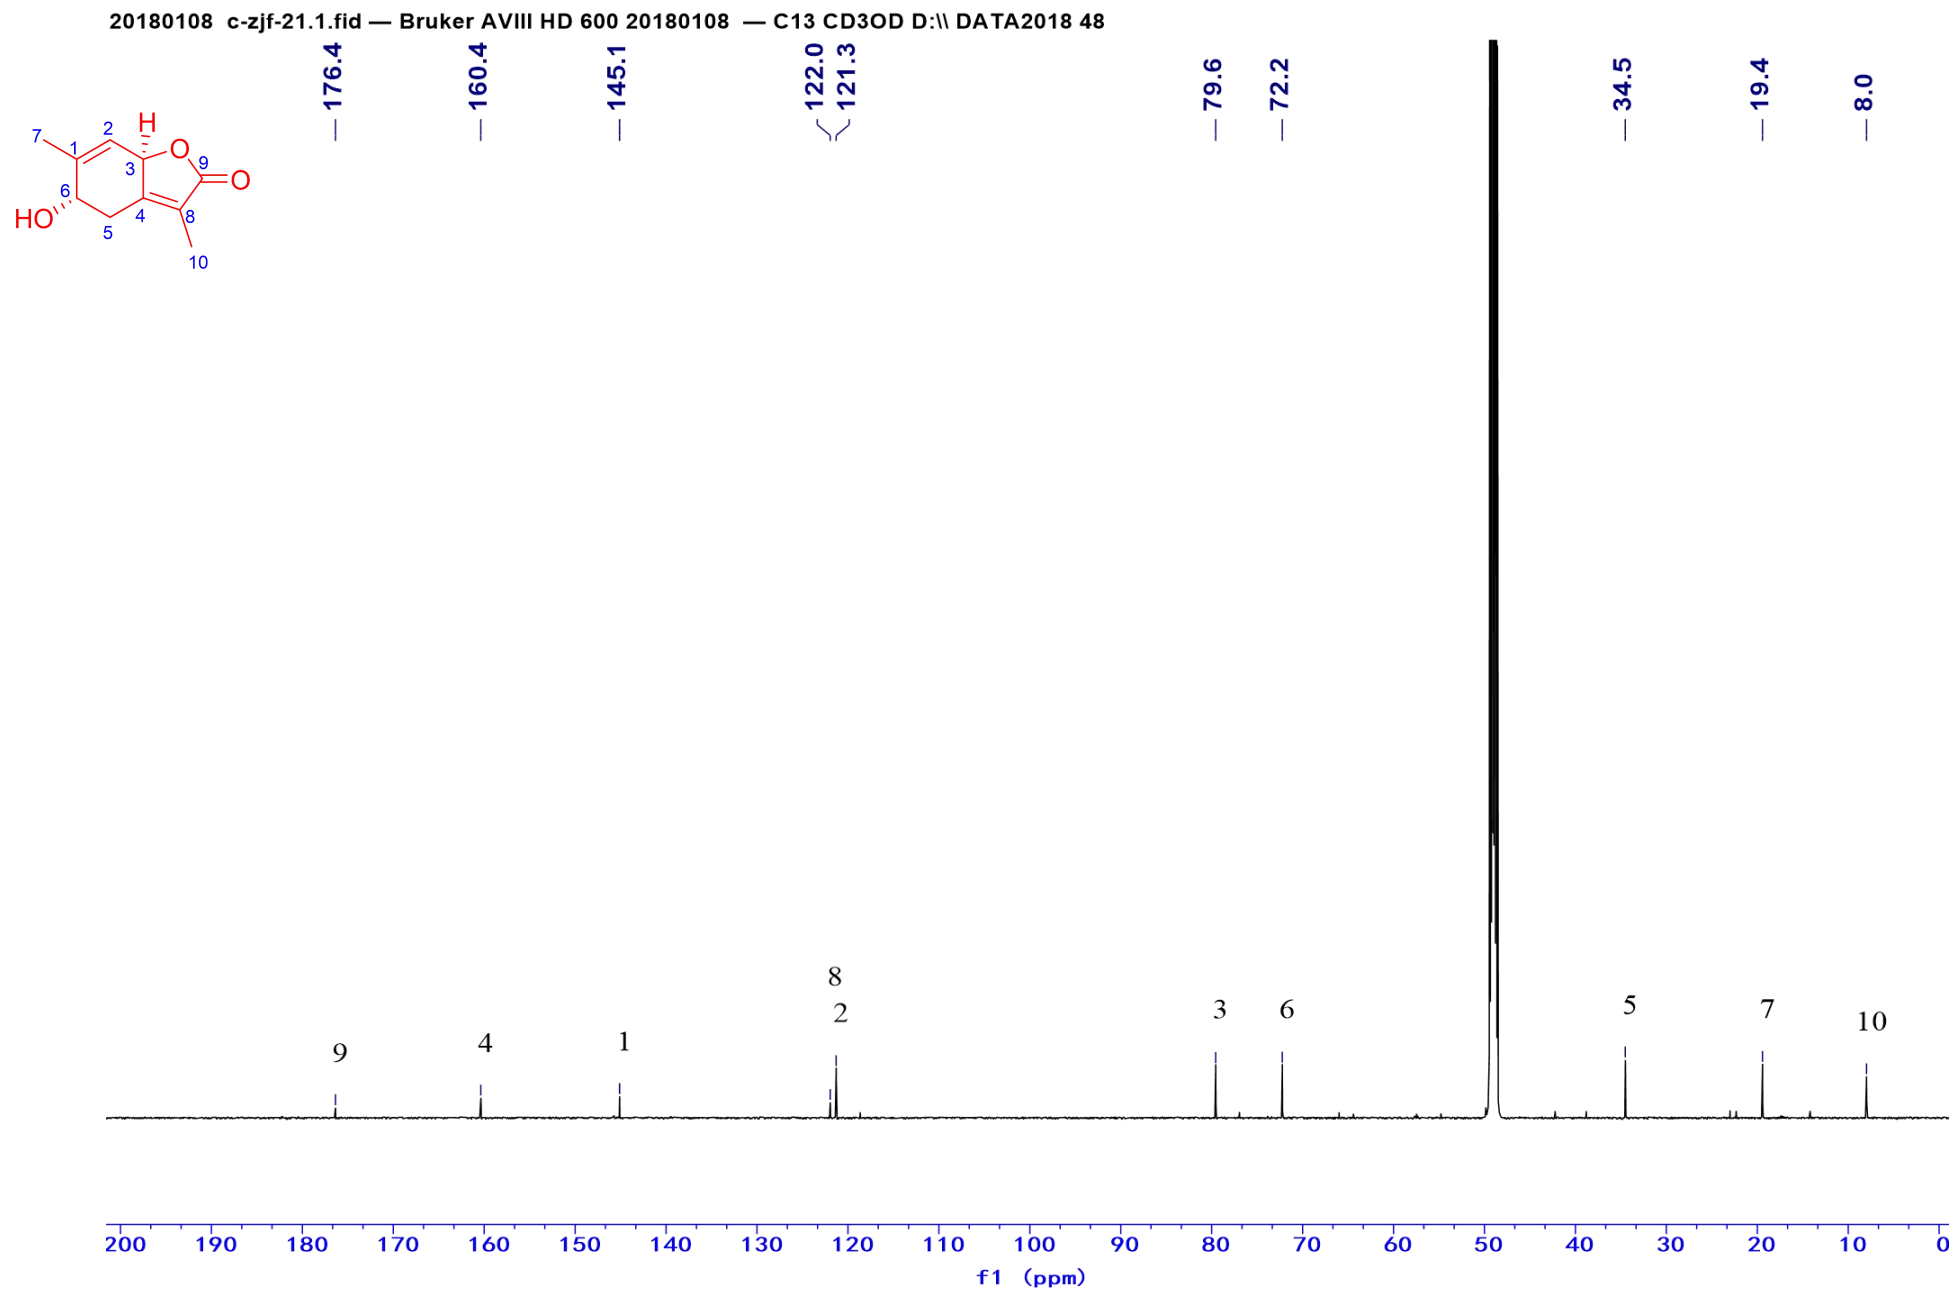

Figure S56. The  $^{13}\text{C}$  NMR Spectrum of Compound 7 in  $\text{MeOH-}d_4$  (150MHz)

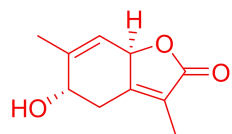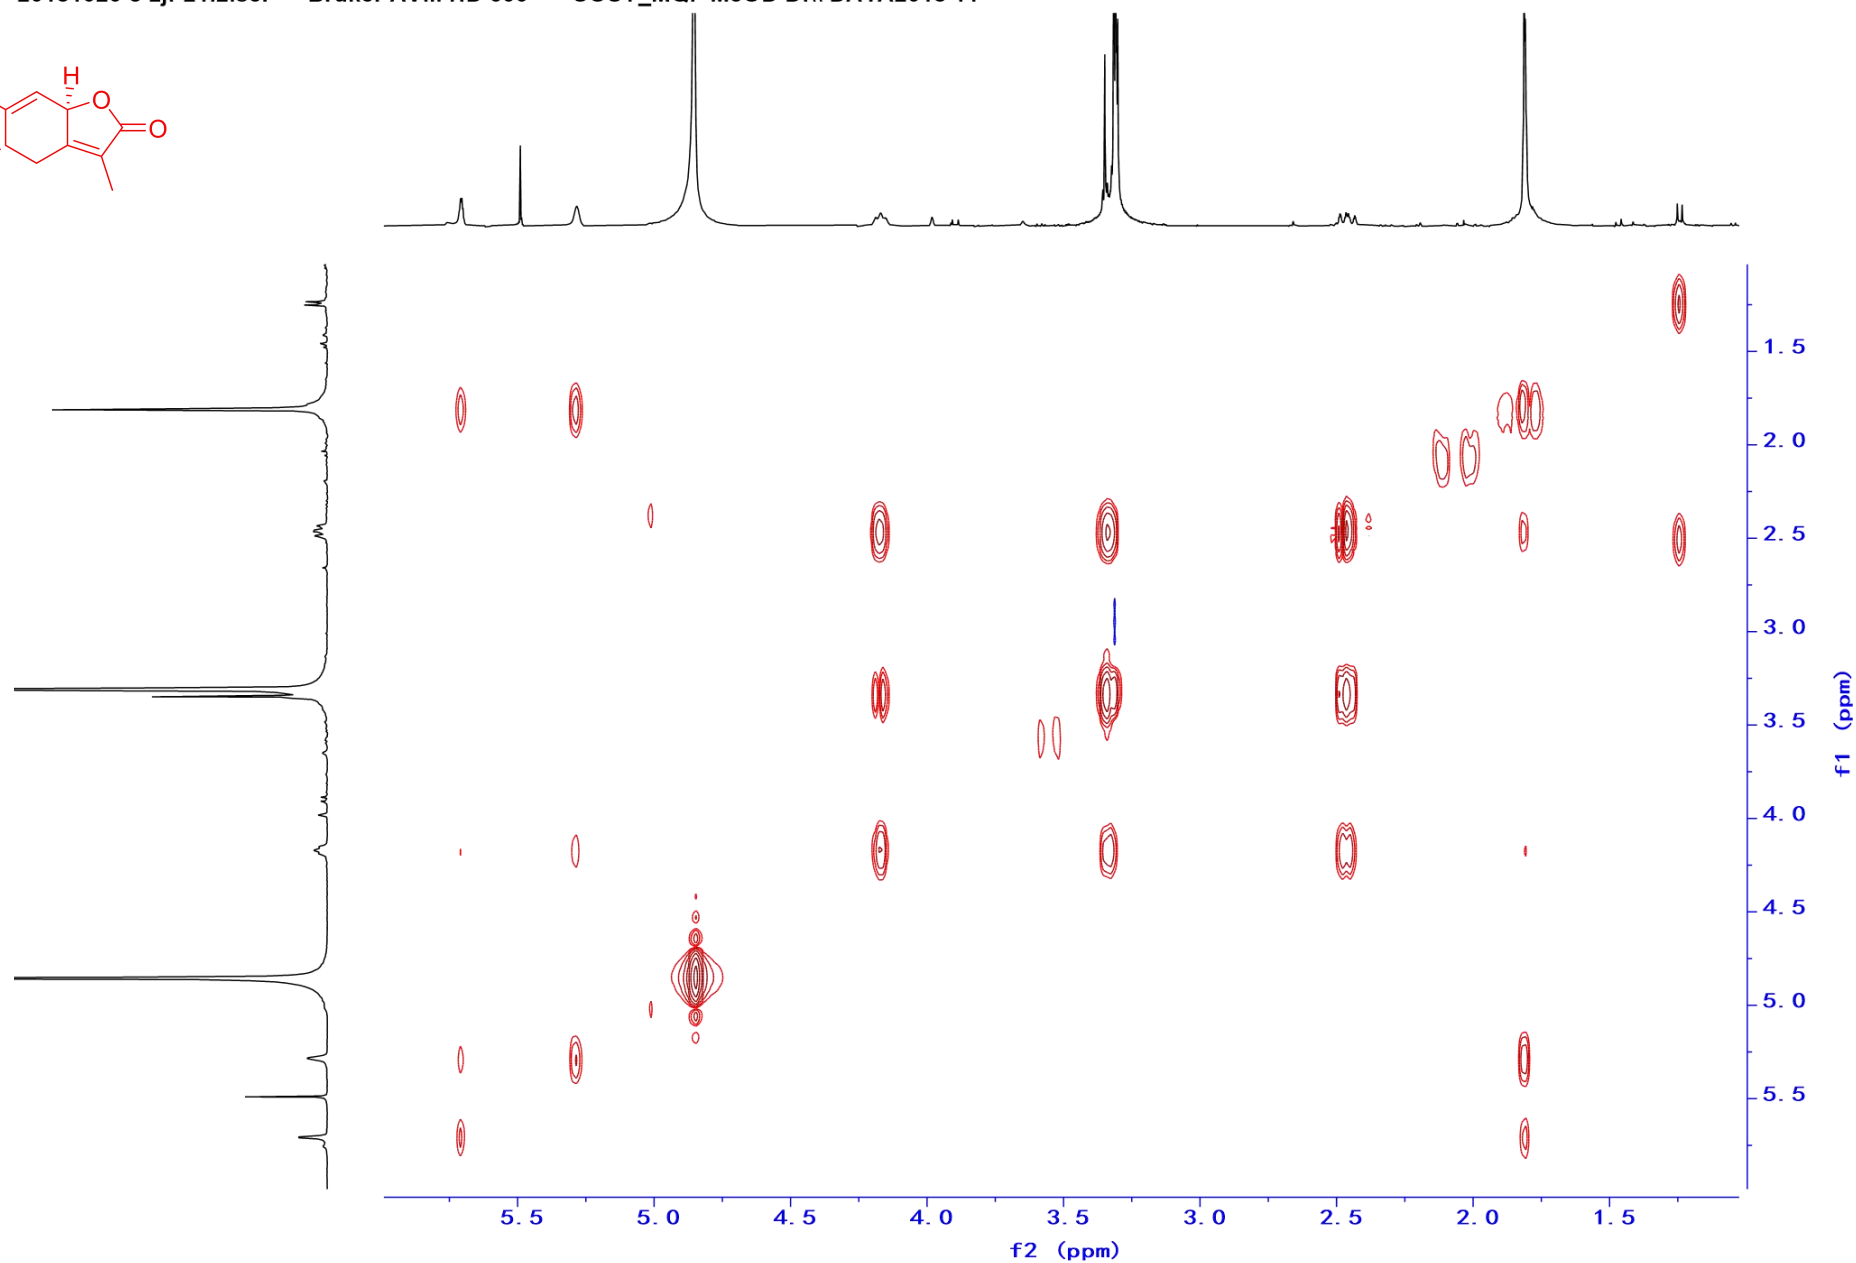

**Figure S57.** The  $^1\text{H}$ - $^1\text{H}$  COSY Spectrum of Compound 7 in  $\text{MeOH-}d_4$  (600MHz)



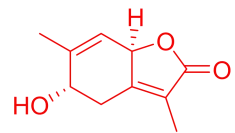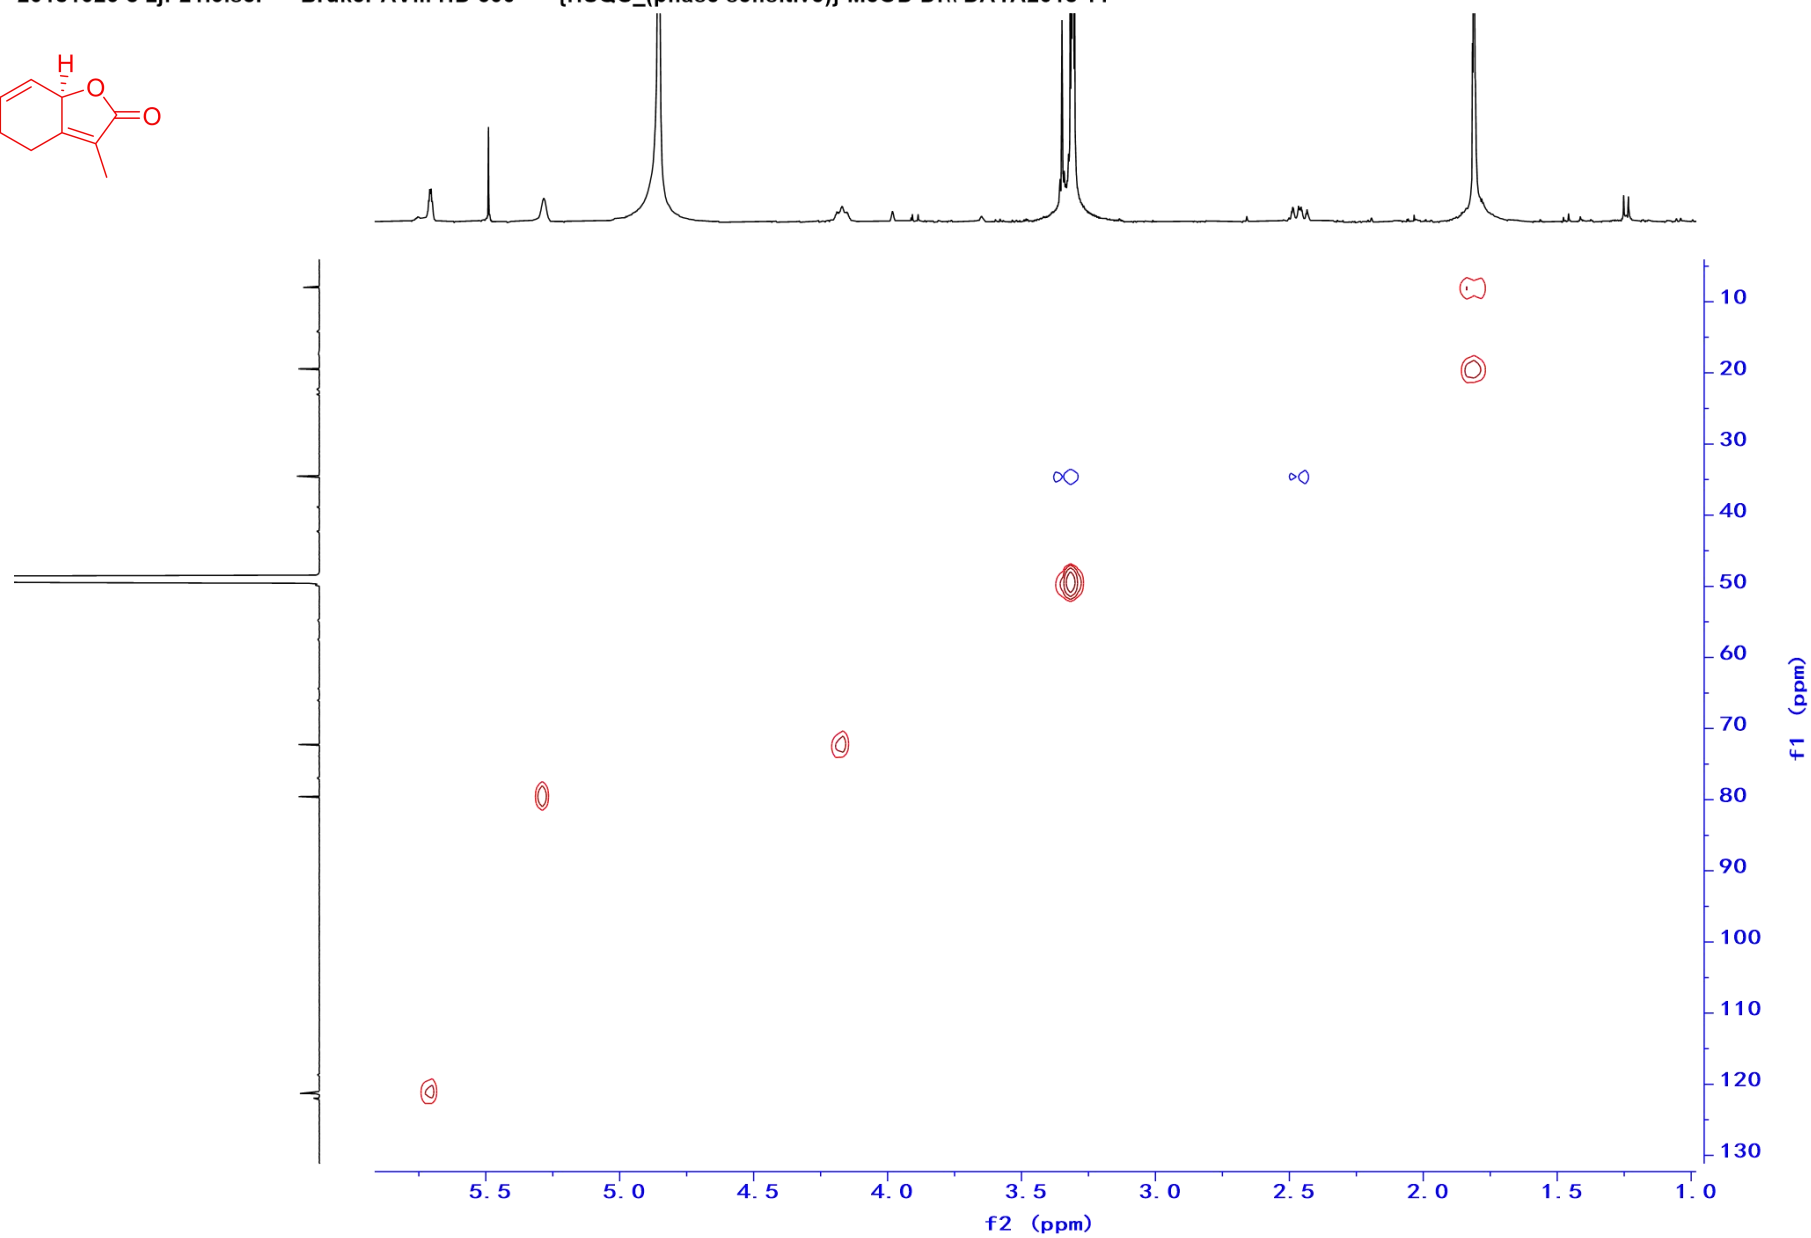

**Figure S58.** The HSQC Spectrum of Compound 7 in MeOH- $d_4$  (600MHz)

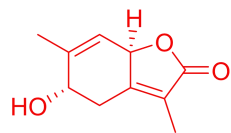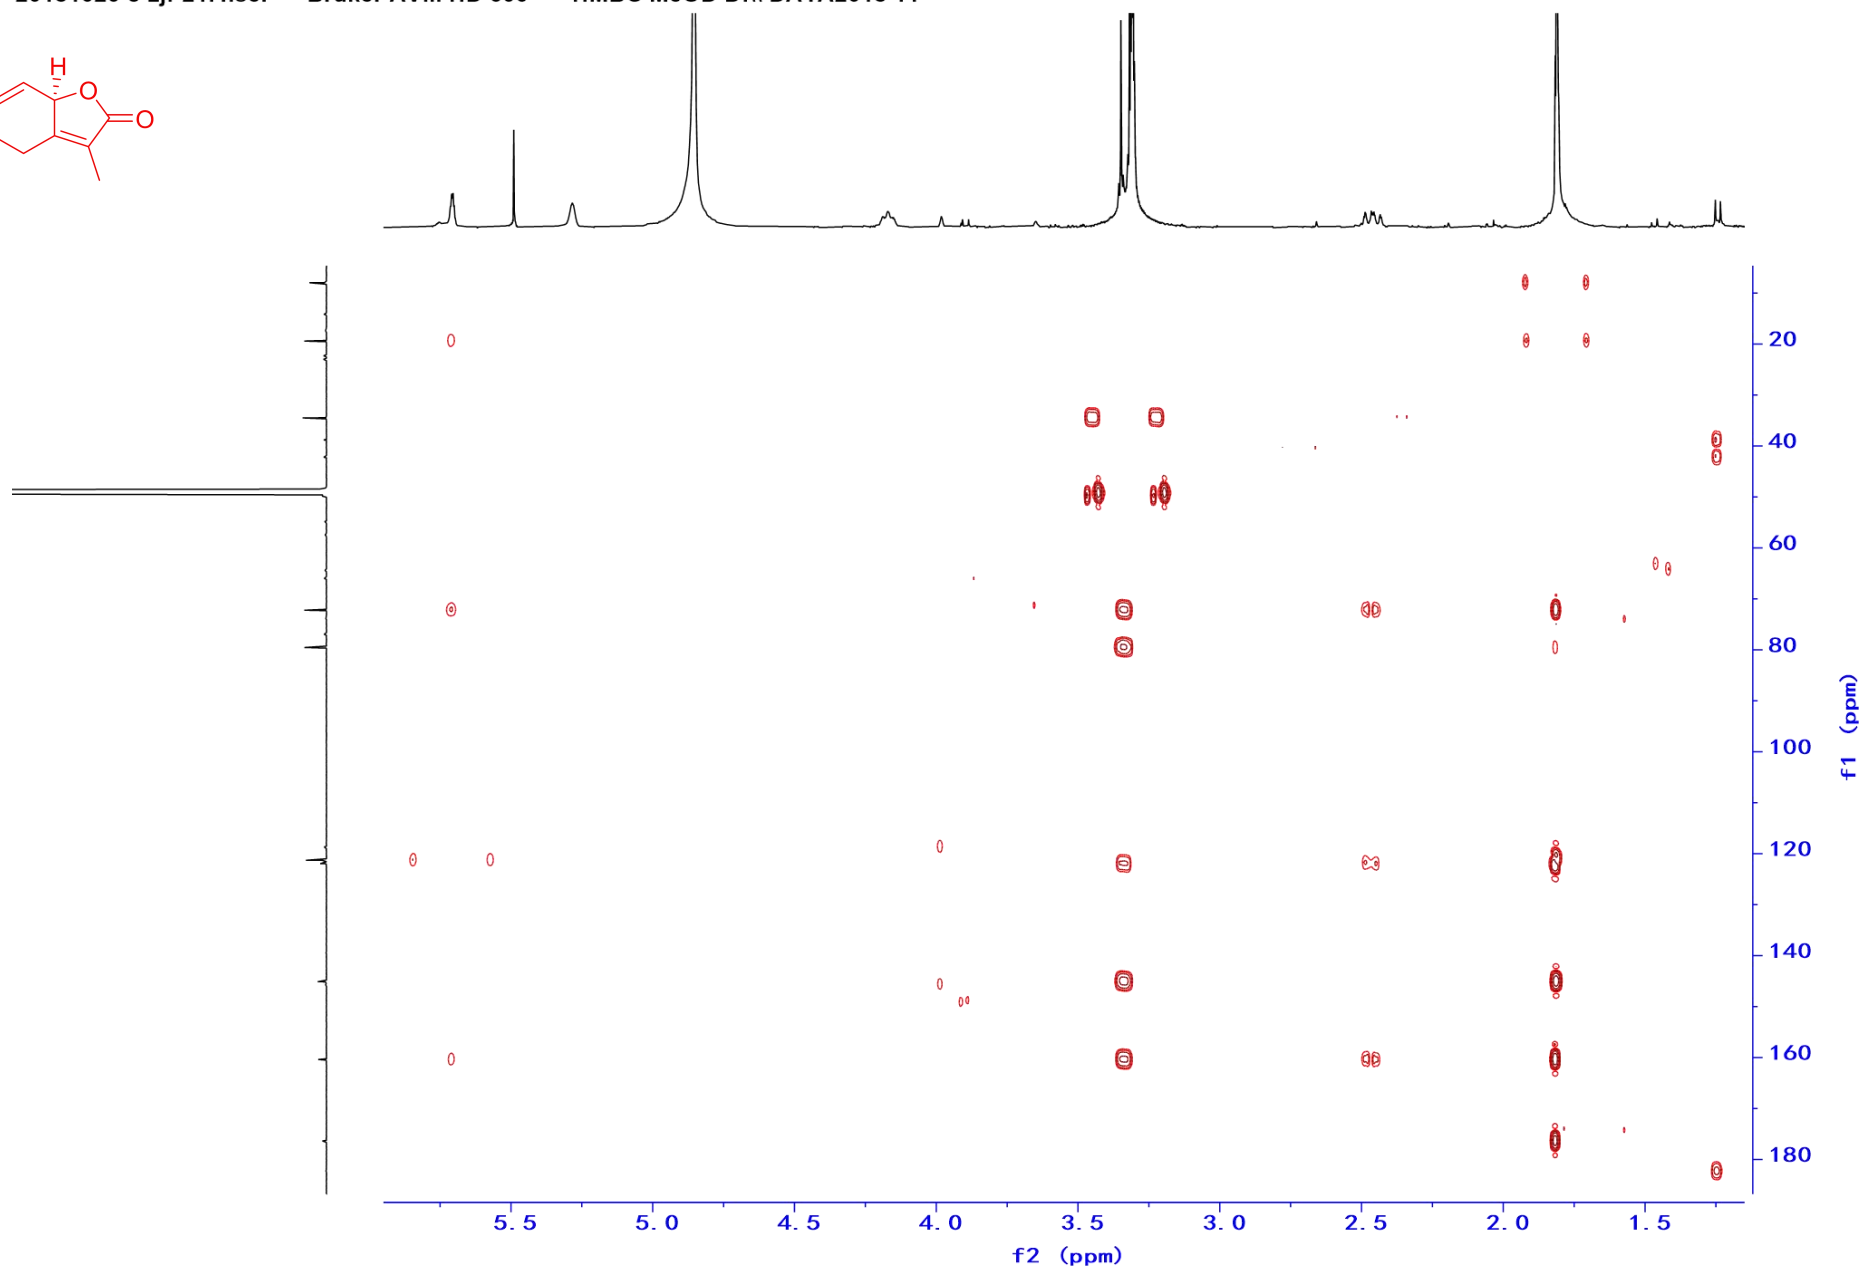

Figure S59. The HMBC Spectrum of Compound 7 in MeOH-*d*<sub>4</sub> (600MHz)

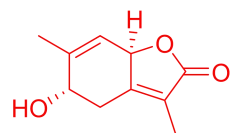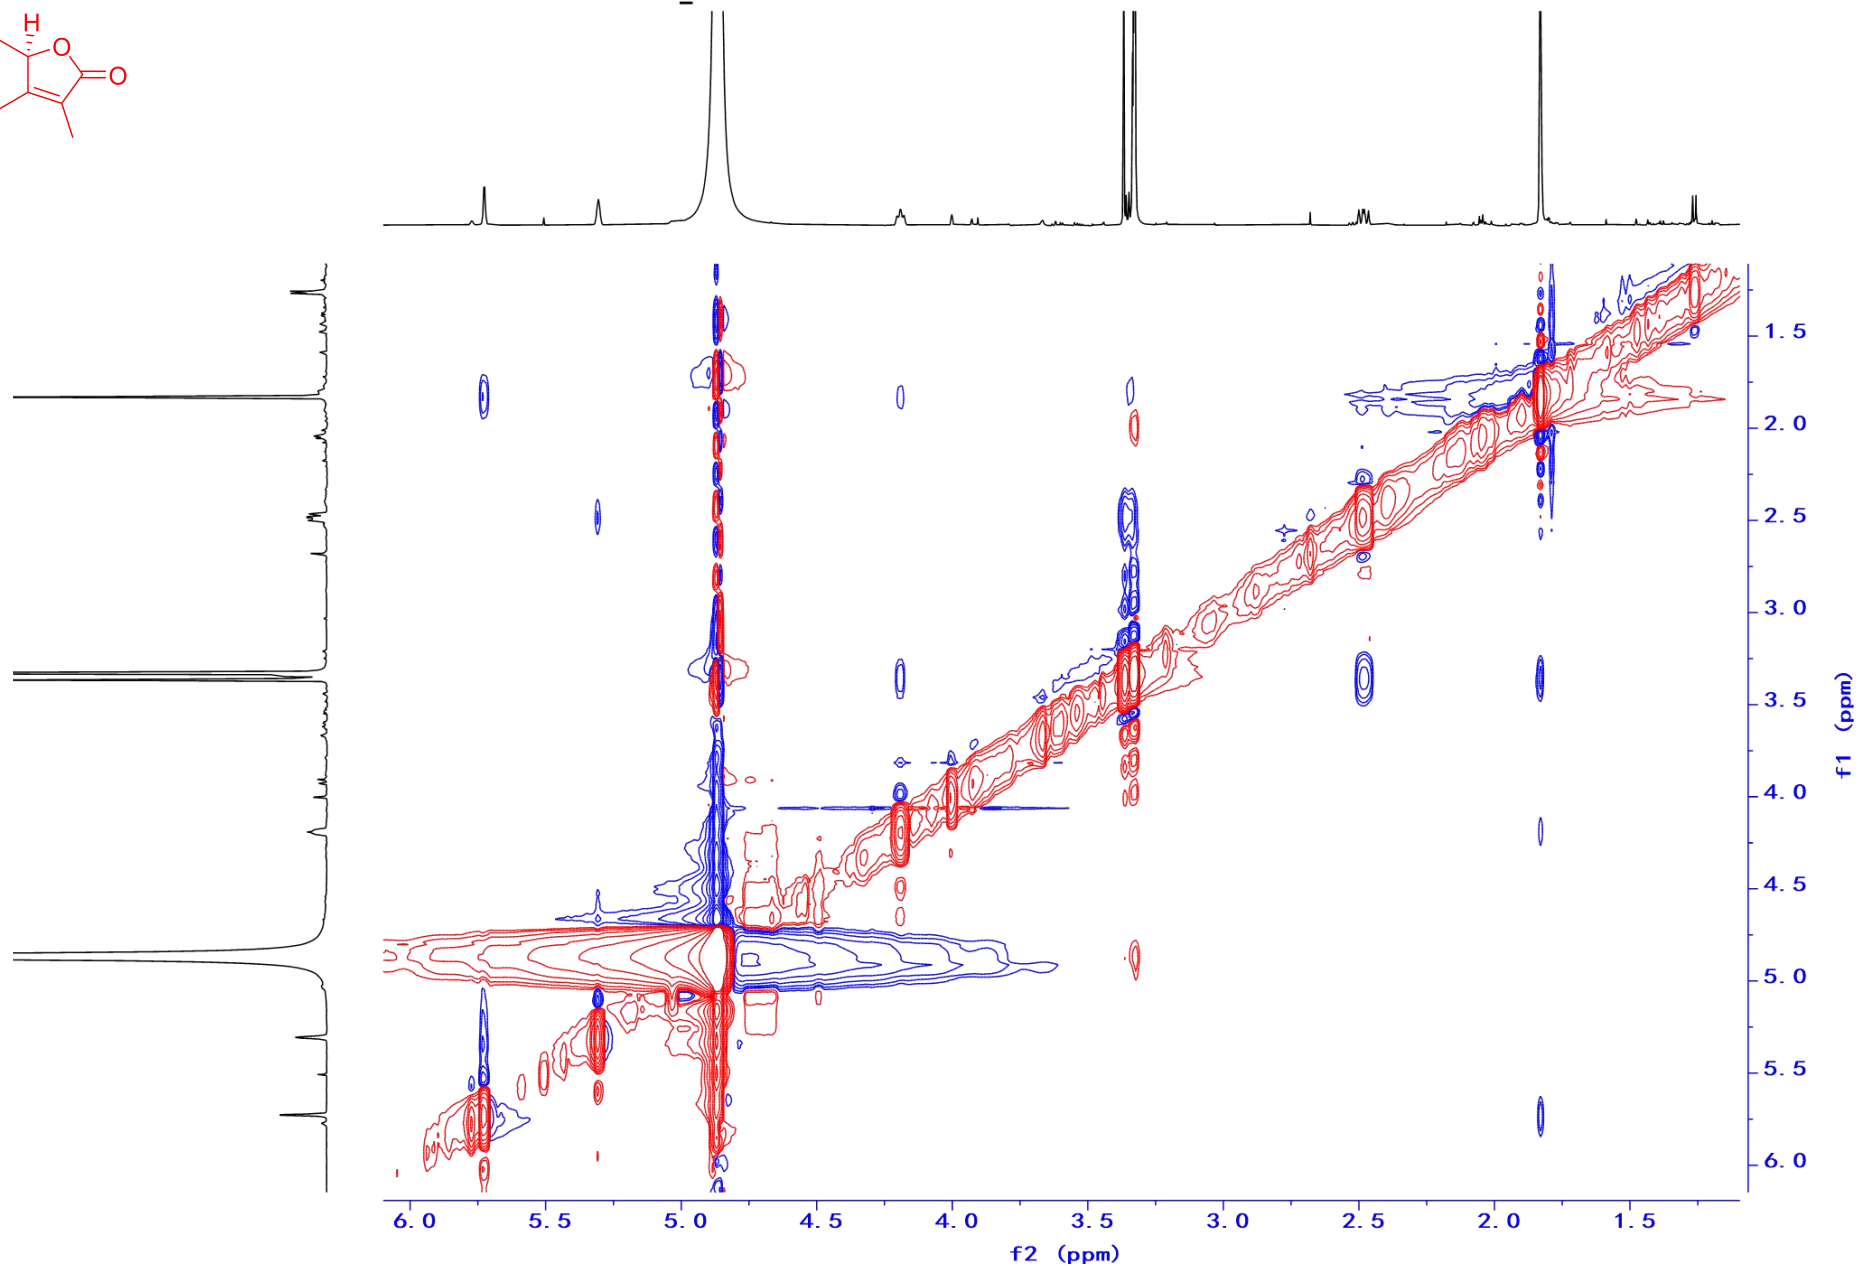

**Figure S60.** The NOESY Spectrum of Compound 7 in MeOH-*d*<sub>4</sub> (600MHz)

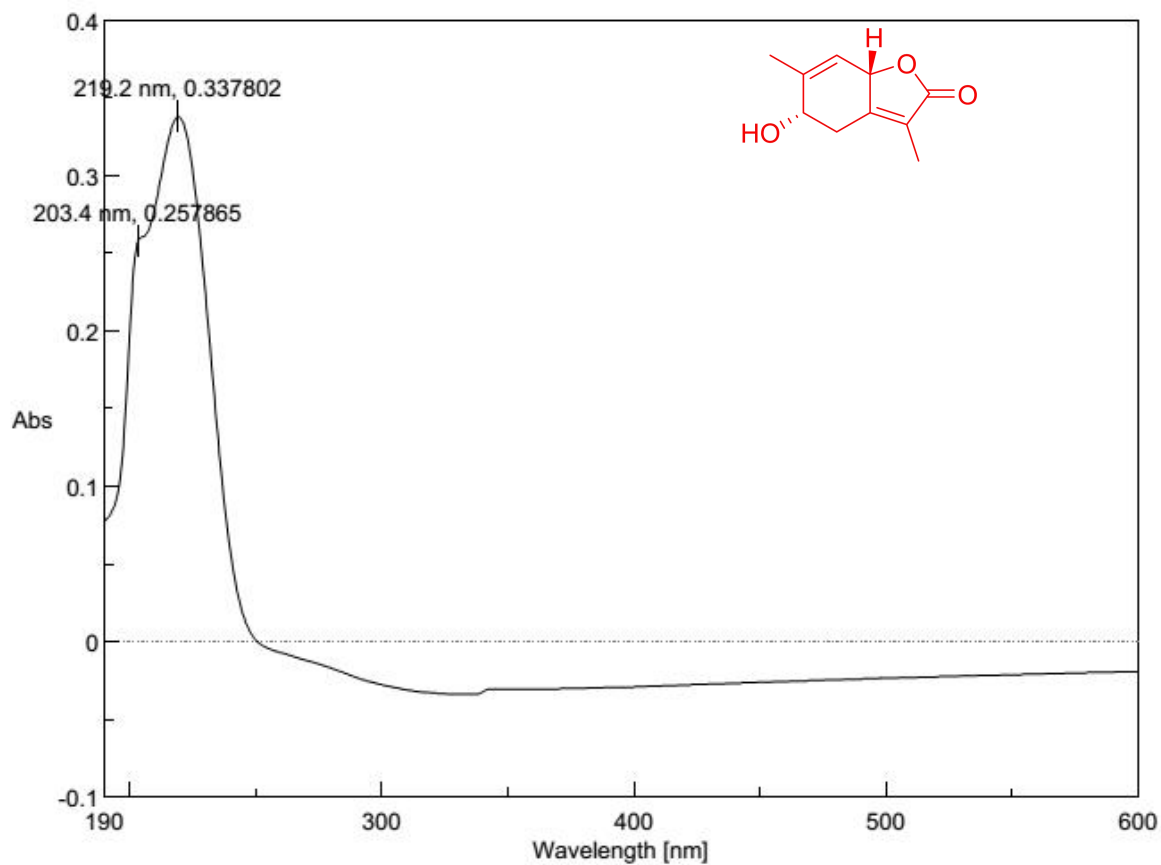

**Figure S61. The UV Spectrum of Compound 8 in MeOH**

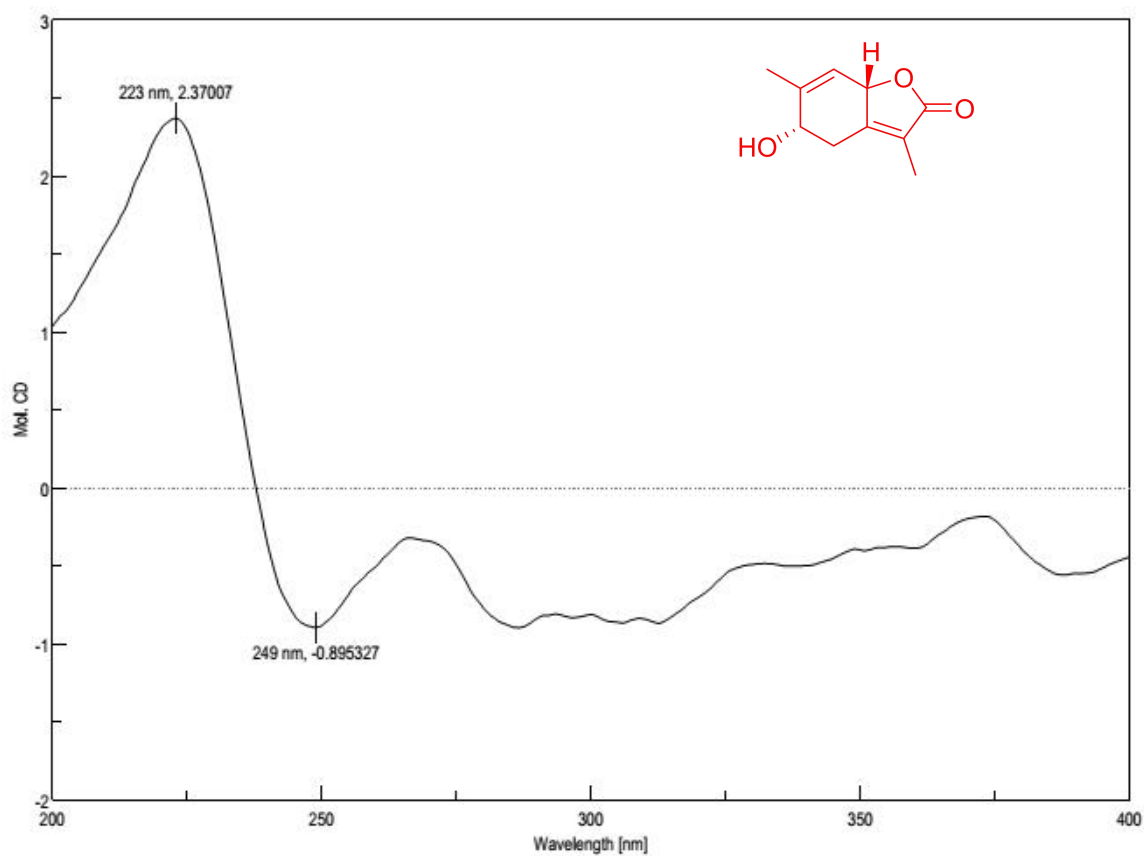

**Figure S62. The CD spectrum of Compound 8 in MeOH**

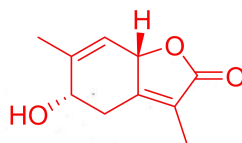

compound NO. : C-2JF-24  
Method : LCMS(compound)-low

RT: 0.00 - 14.39 SM: 7G

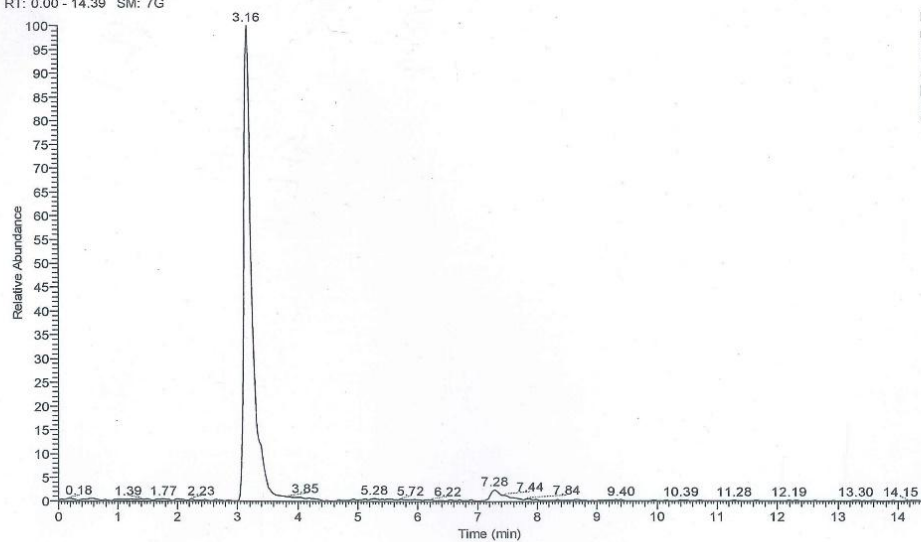

NL: 2.34E7  
m/z=  
181.08491-  
181.08673 F: FTMS  
+ p ESI Full ms  
[100.0000-  
1500.0000] MS  
C-2JF-24

C-2JF-24 #321 RT: 3.18 AV: 1 NL: 2.18E7  
T: FTMS + p ESI Full ms [100.0000-1500.0000]  
181.08582

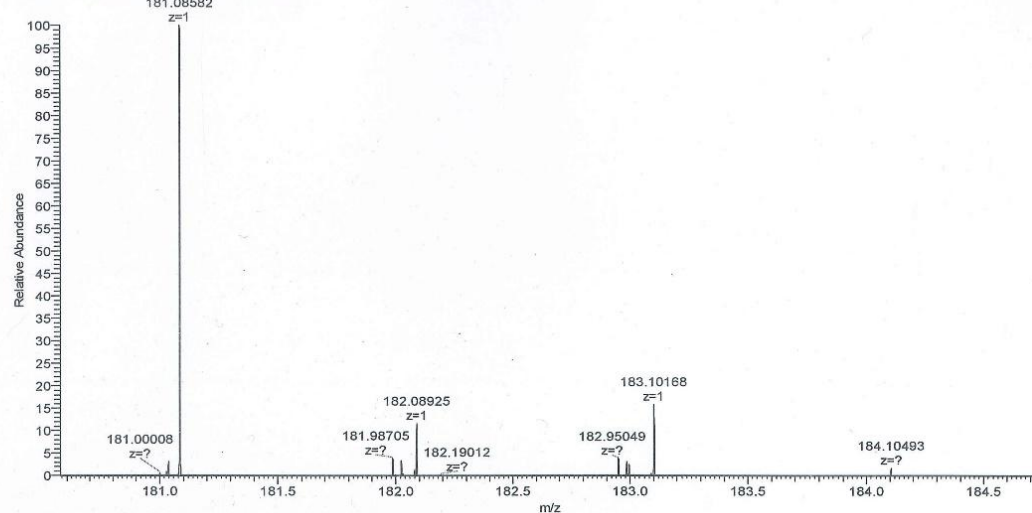

| m/z       | Theo. Mass | Delta (ppm) | RDB equiv. | Composition |     |
|-----------|------------|-------------|------------|-------------|-----|
| 181.08582 | 181.08592  | -0.56       | 4.5        | C10 H13 O3  | M+H |

**Figure S63. The HR-mass Spectrum of Compound 8 in MeOH**

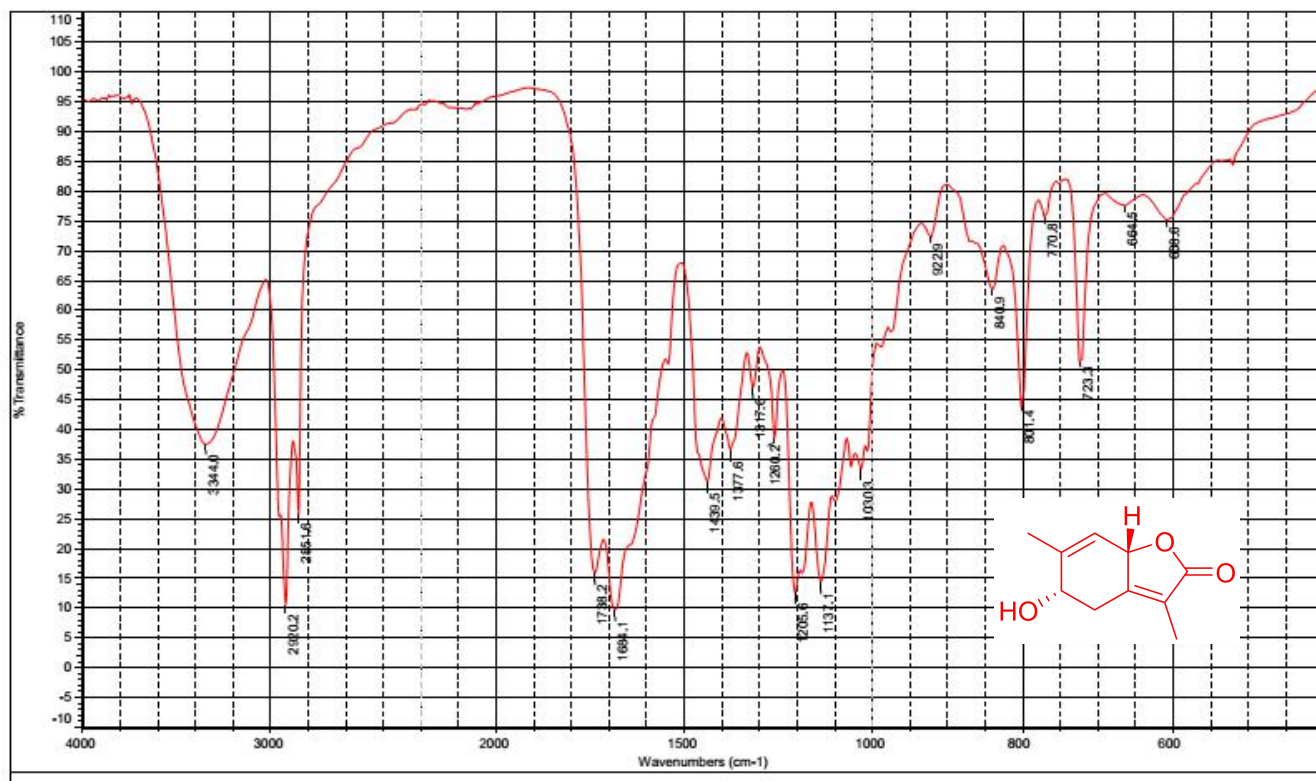

**Figure S64. The IR Spectrum of Compound 8**

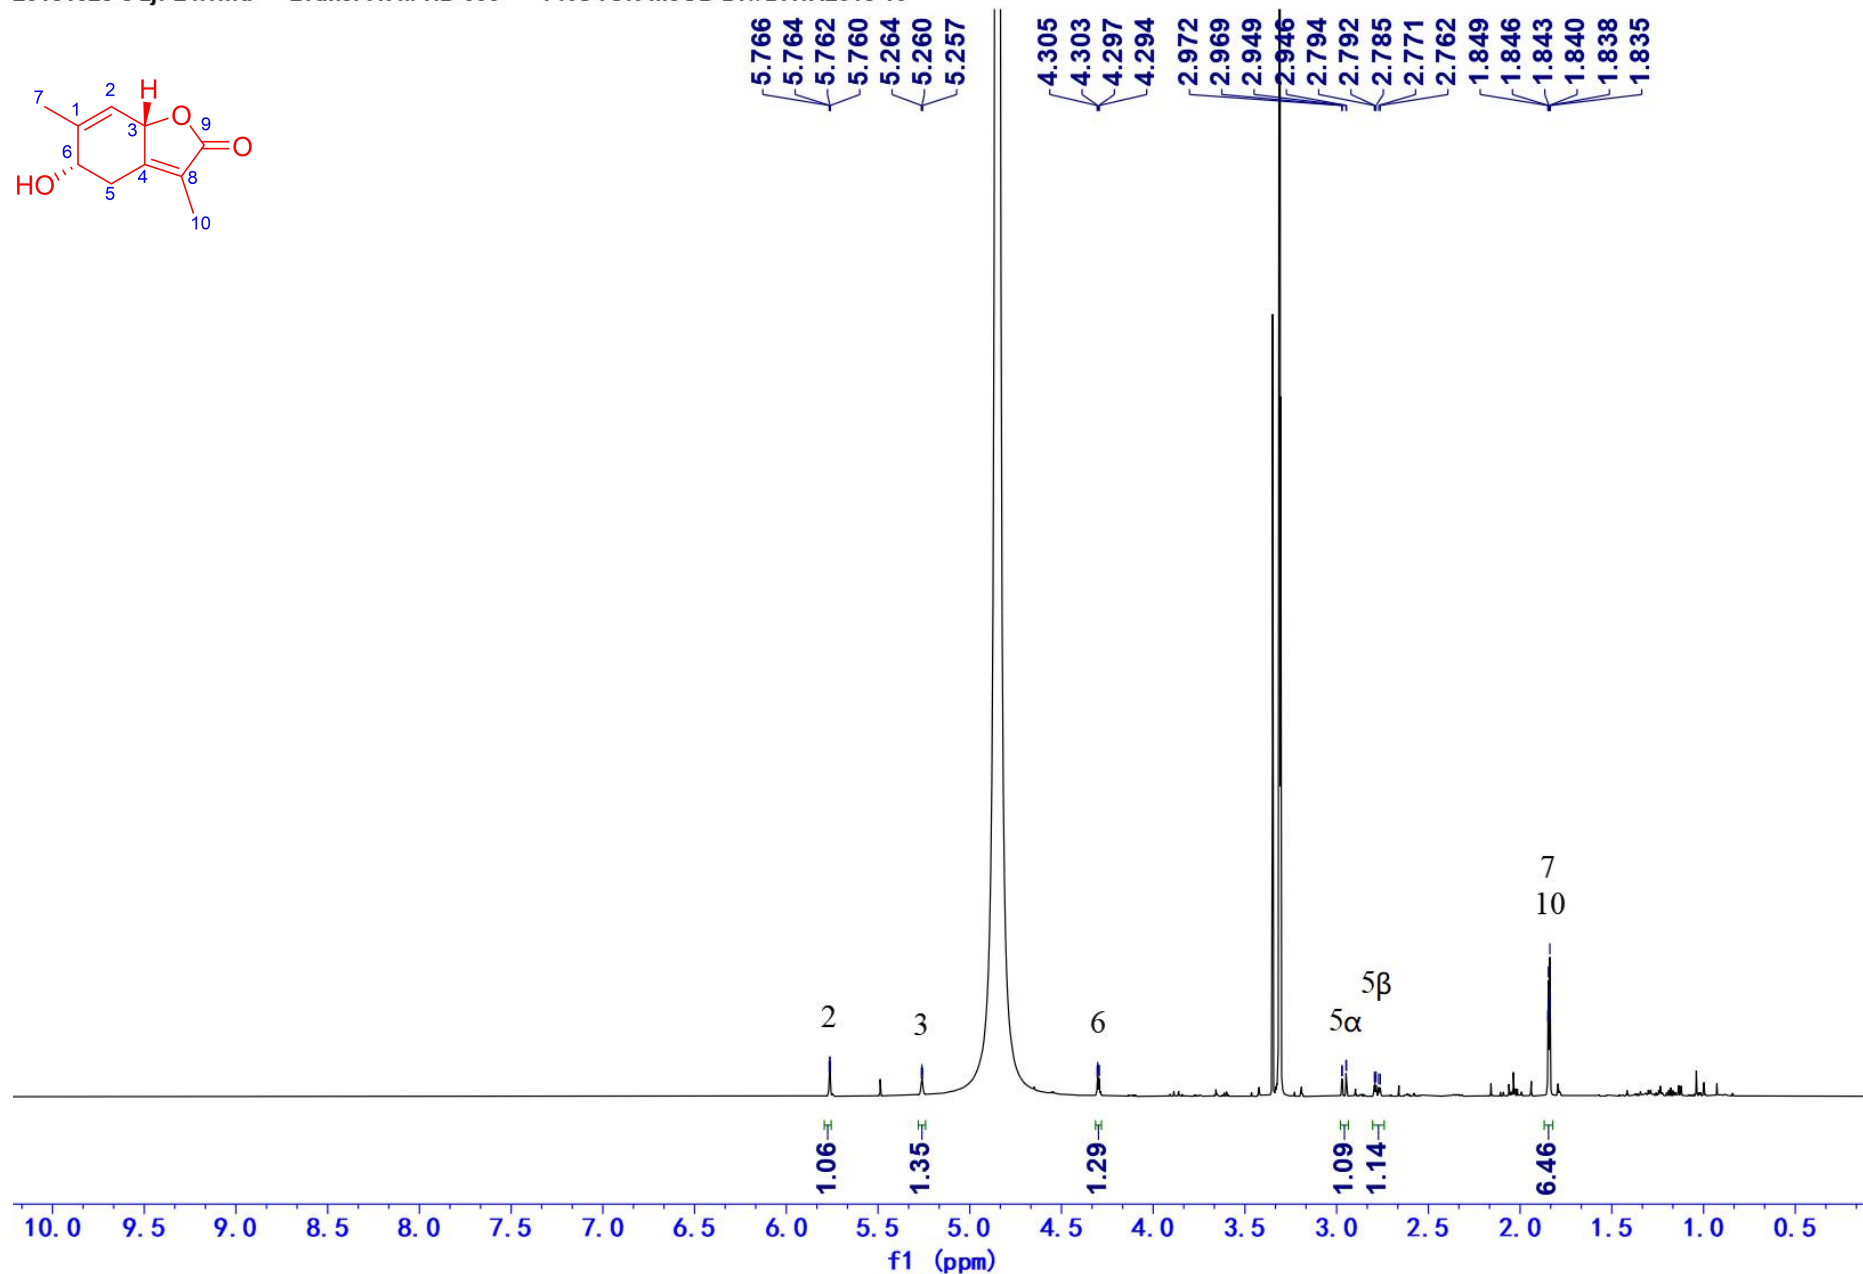

Figure S65. The  $^1\text{H}$  NMR Spectrum of Compound 8 in  $\text{MeOH-}d_4$  (600MHz)

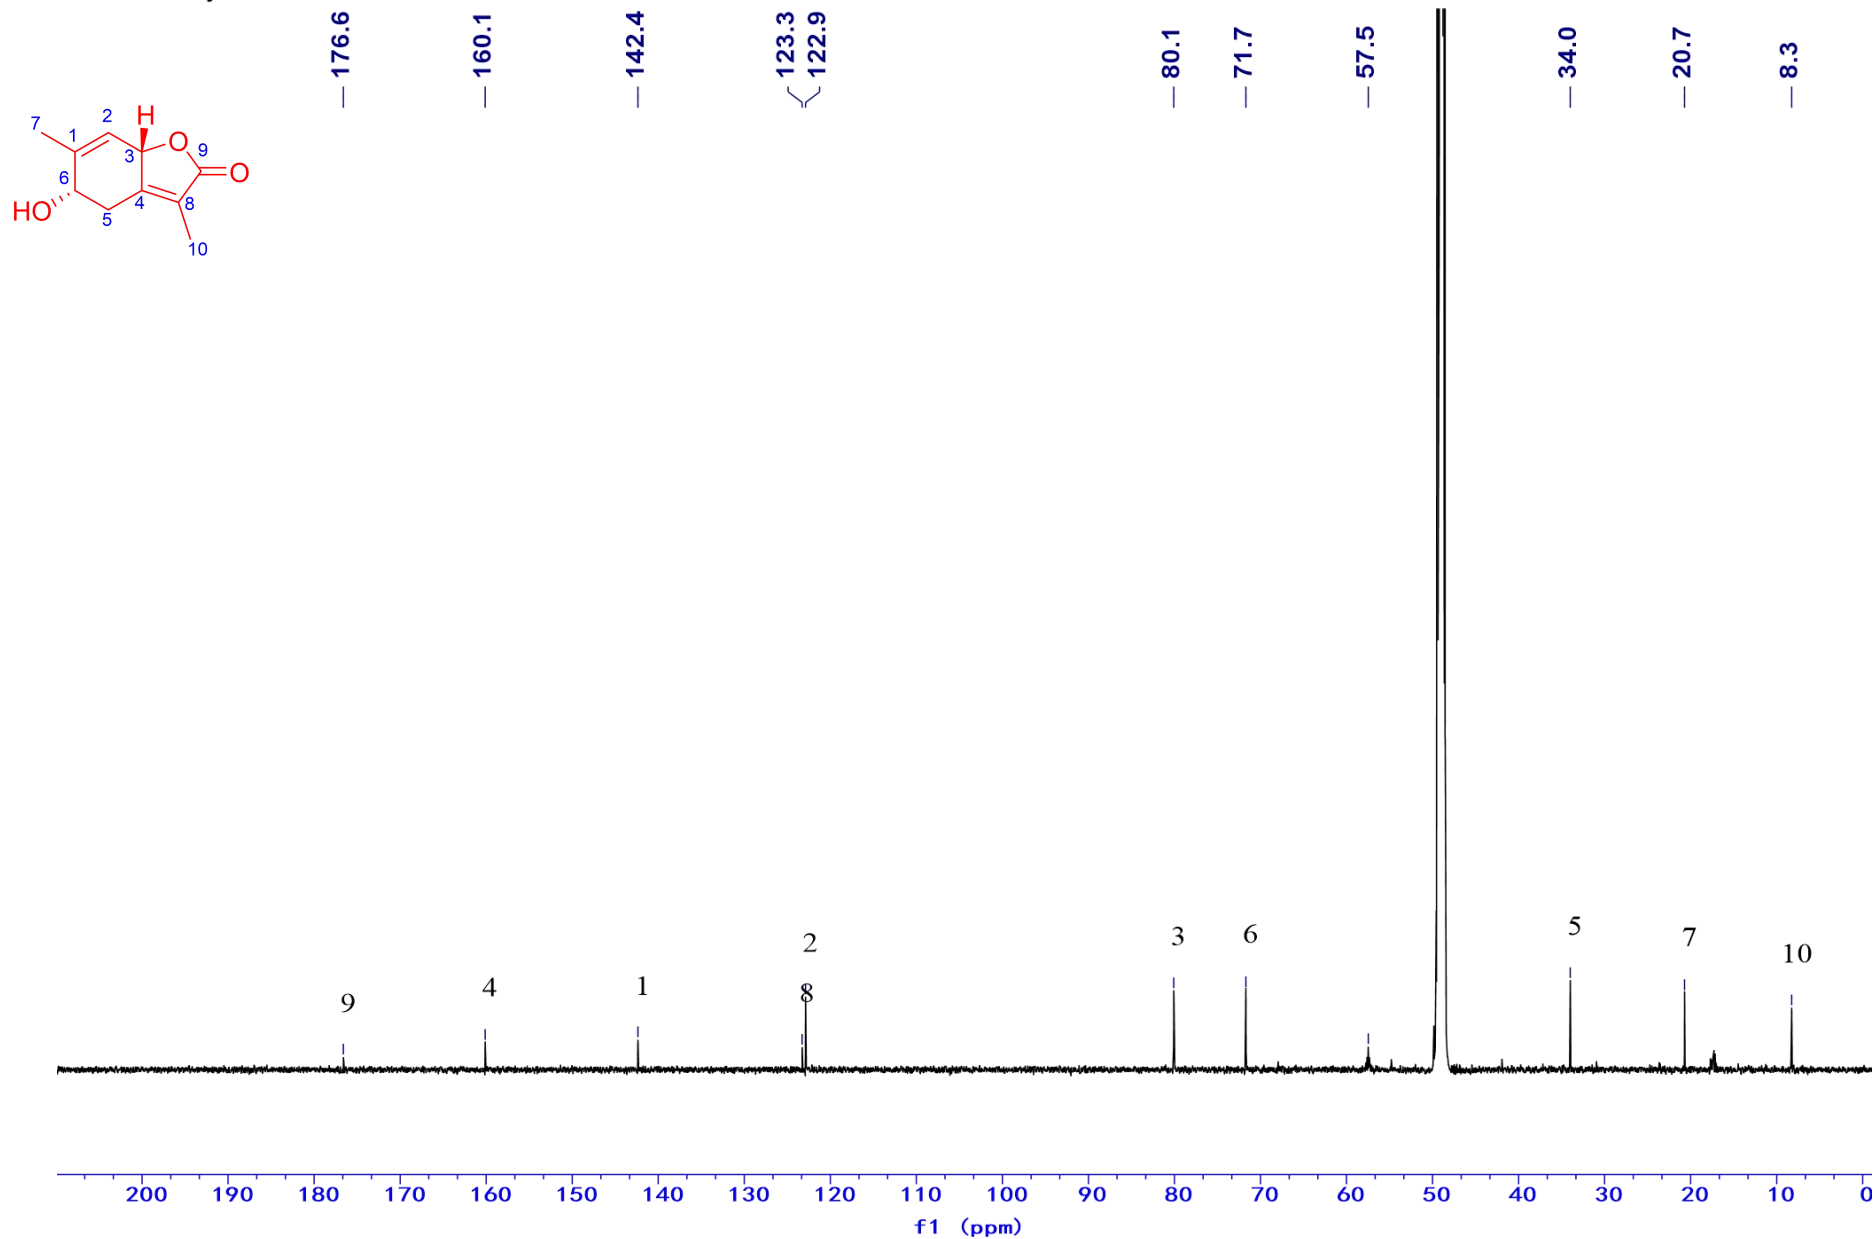

Figure S66. The  $^{13}\text{C}$  NMR Spectrum of Compound 8 in  $\text{MeOH-}d_4$  (150MHz)



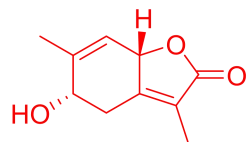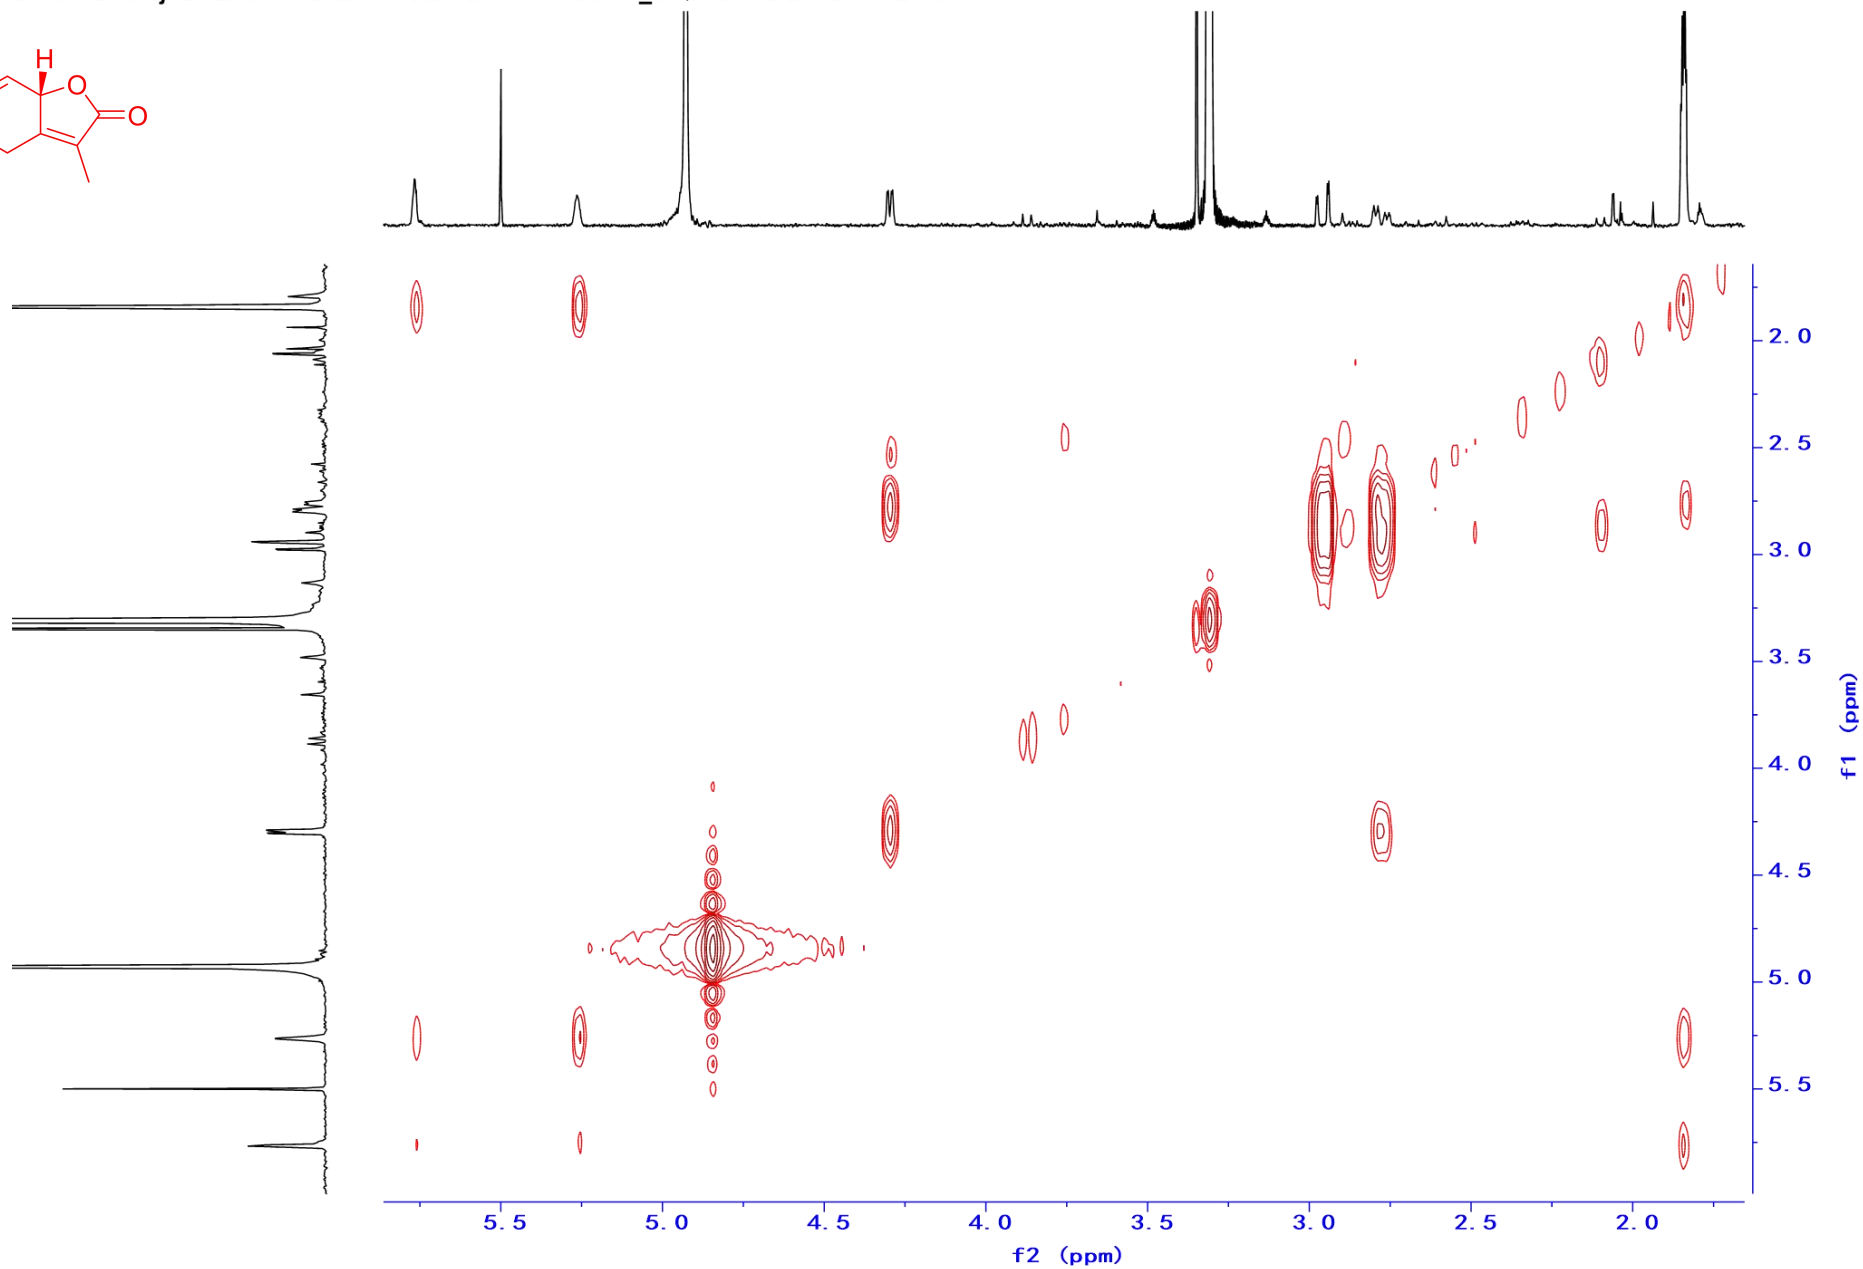

Figure S67. The  $^1\text{H}$ - $^1\text{H}$  COSY Spectrum of Compound 8 in  $\text{MeOH-}d_4$  (600MHz)

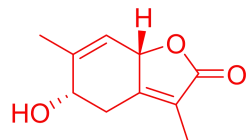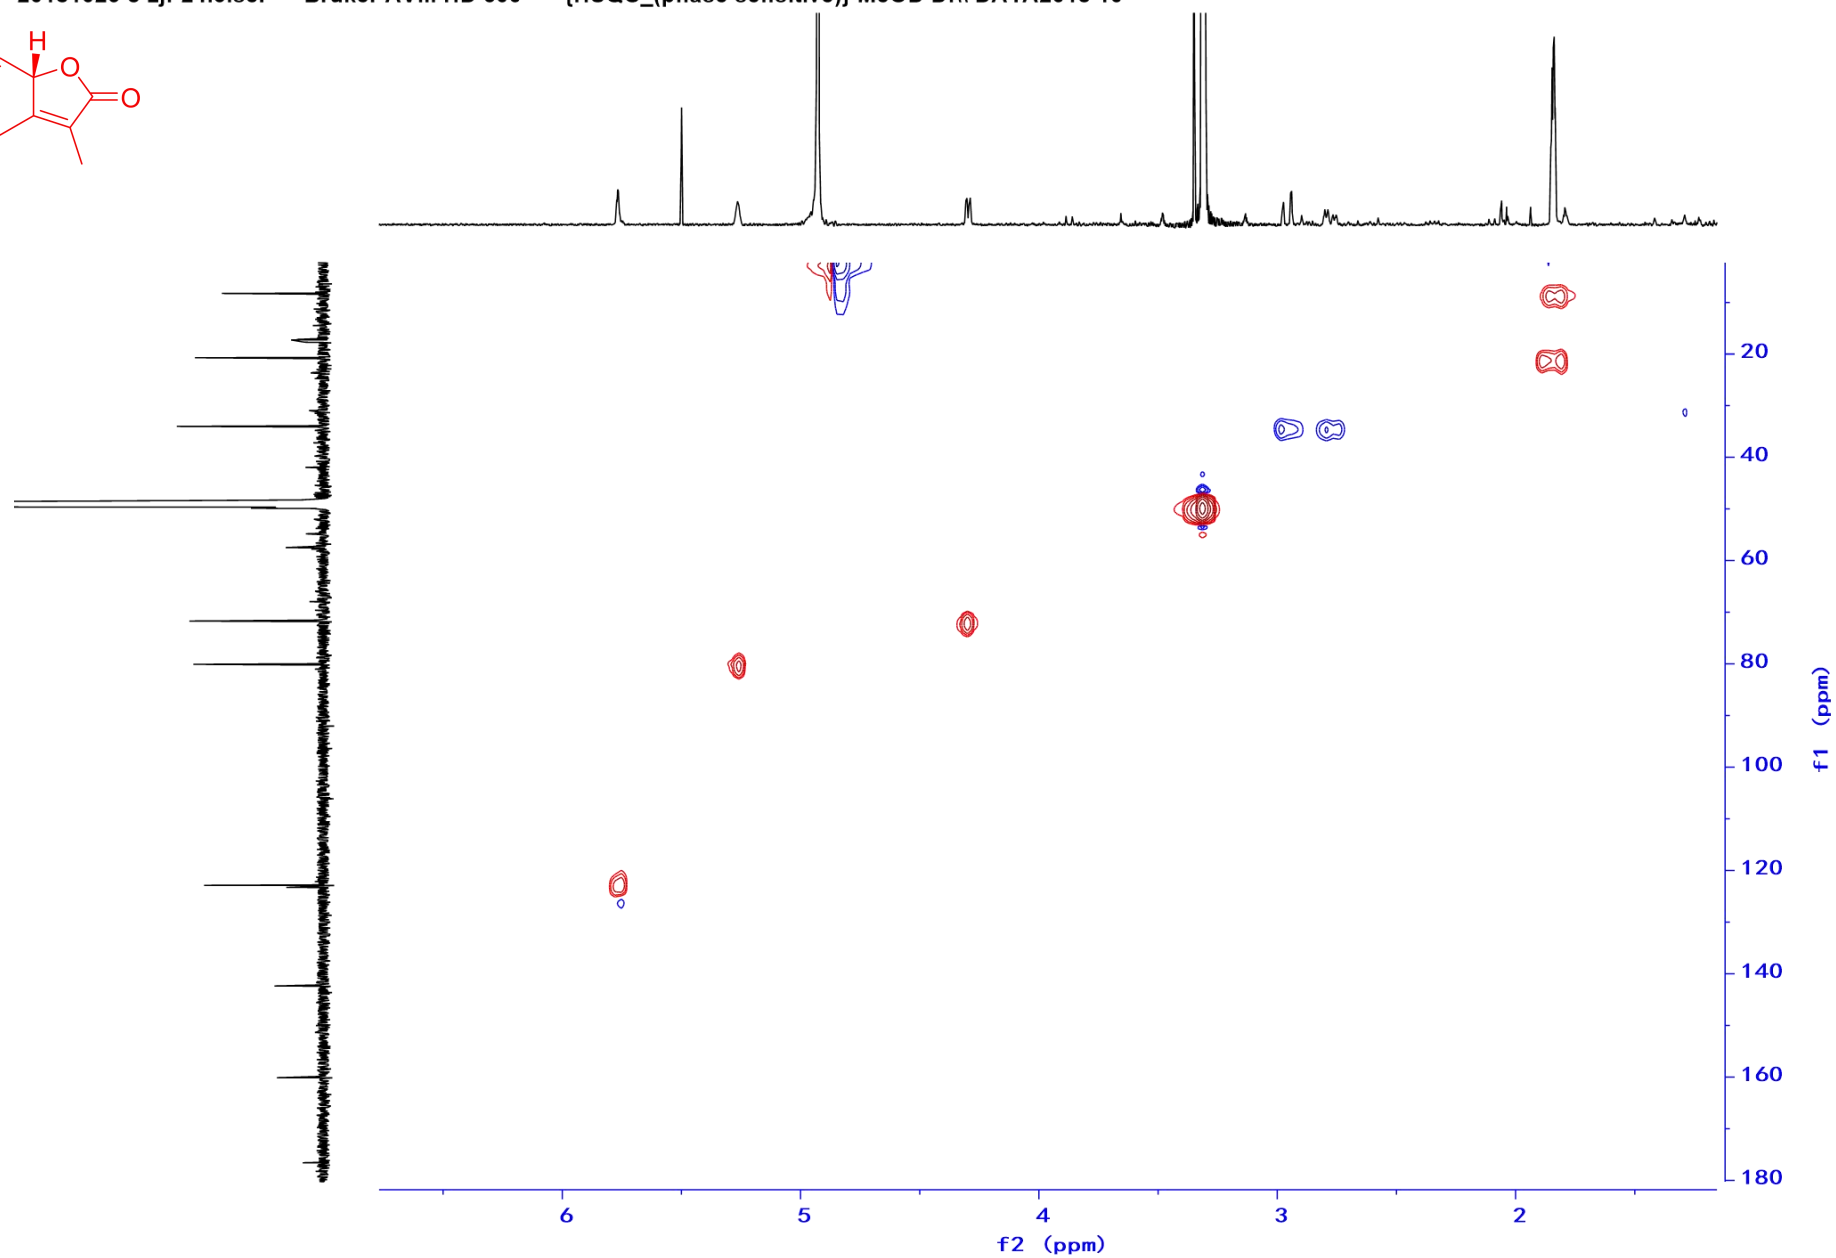

Figure S68. The HSQC Spectrum of Compound 8 in MeOH-*d*<sub>4</sub> (600MHz)

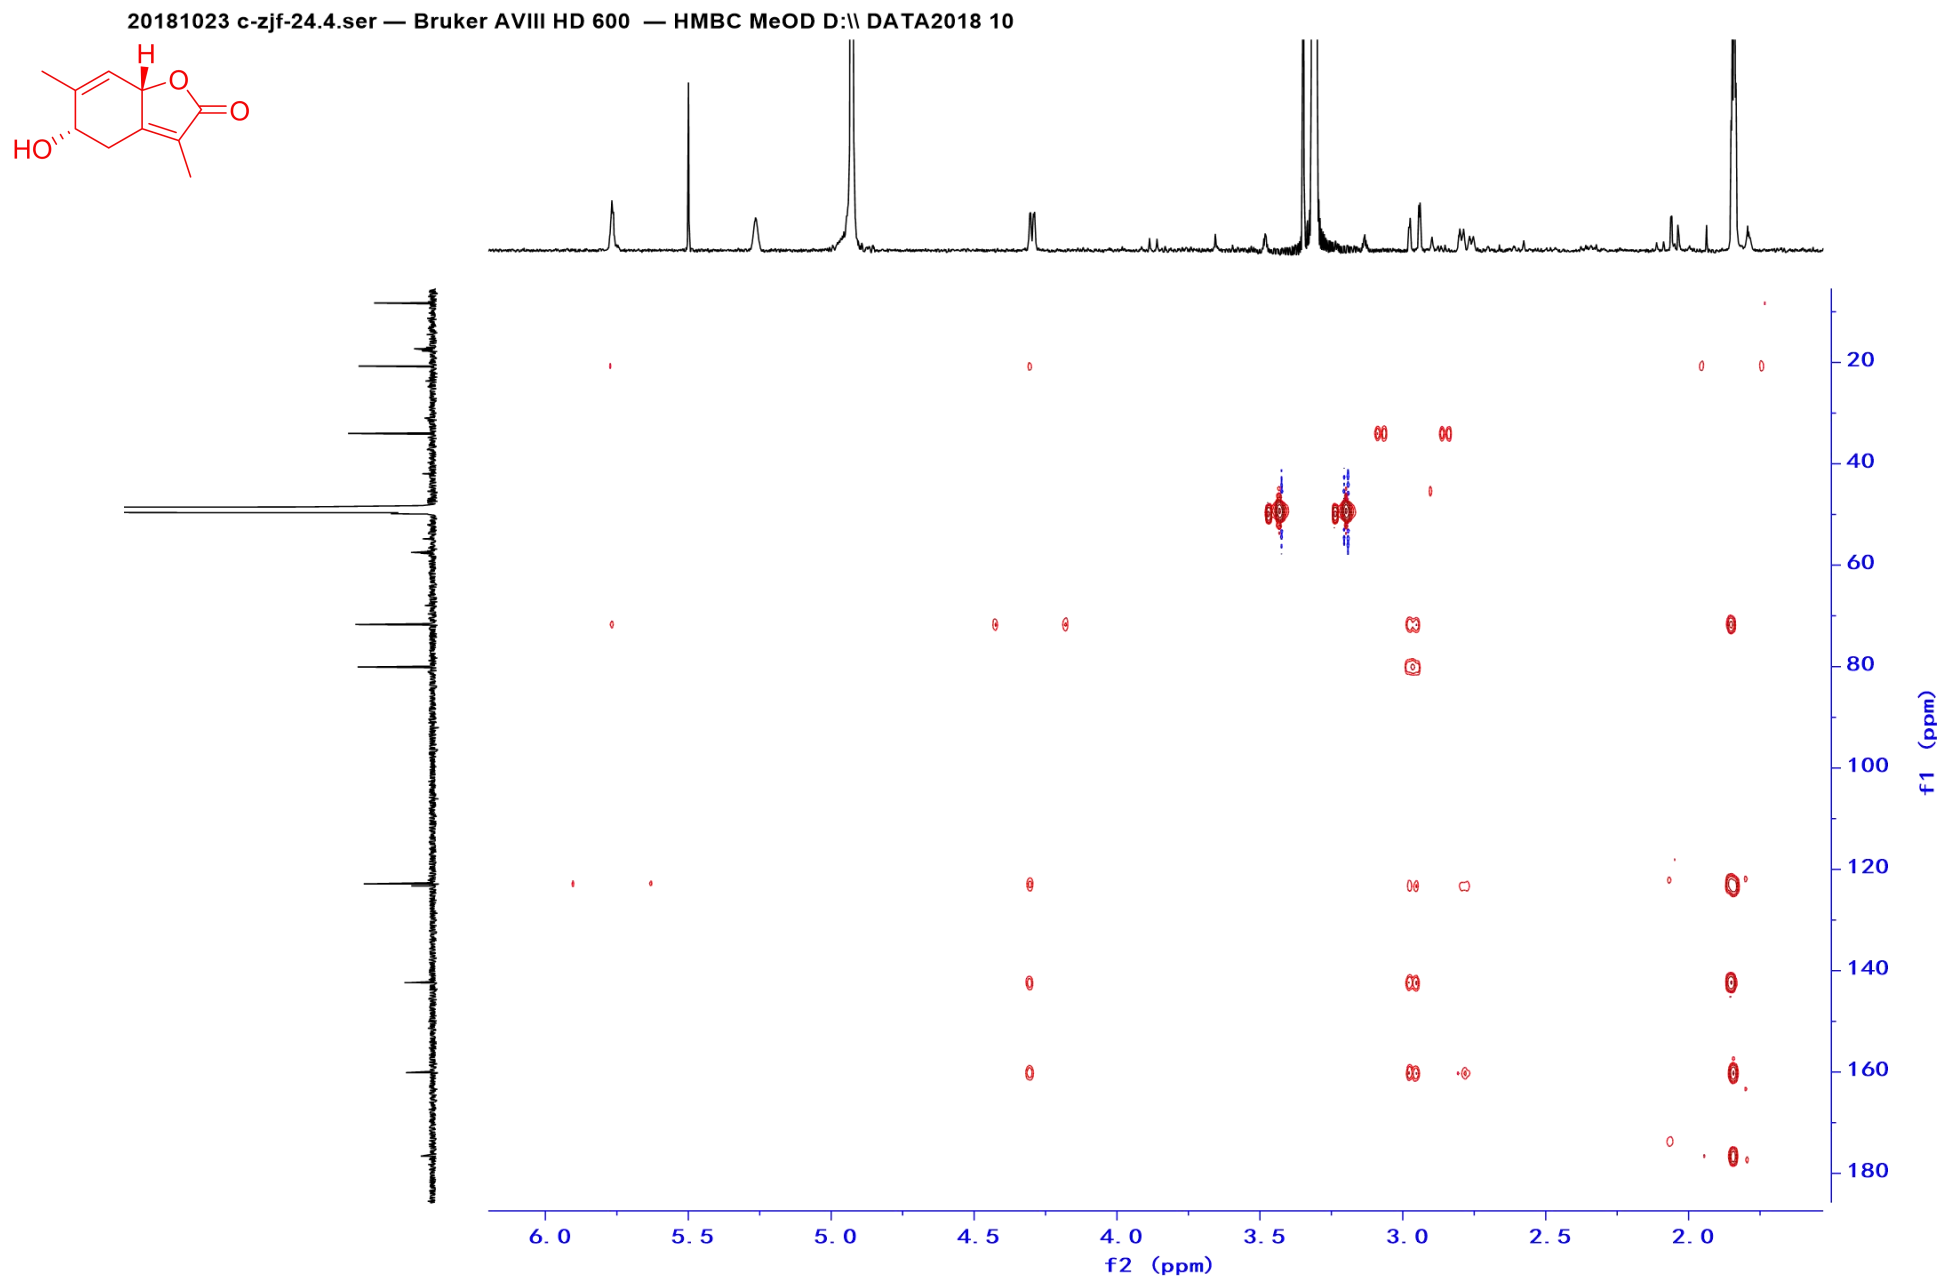

Figure S69. The HMBC Spectrum of Compound 8 in MeOH- $d_4$  (600MHz)

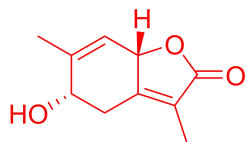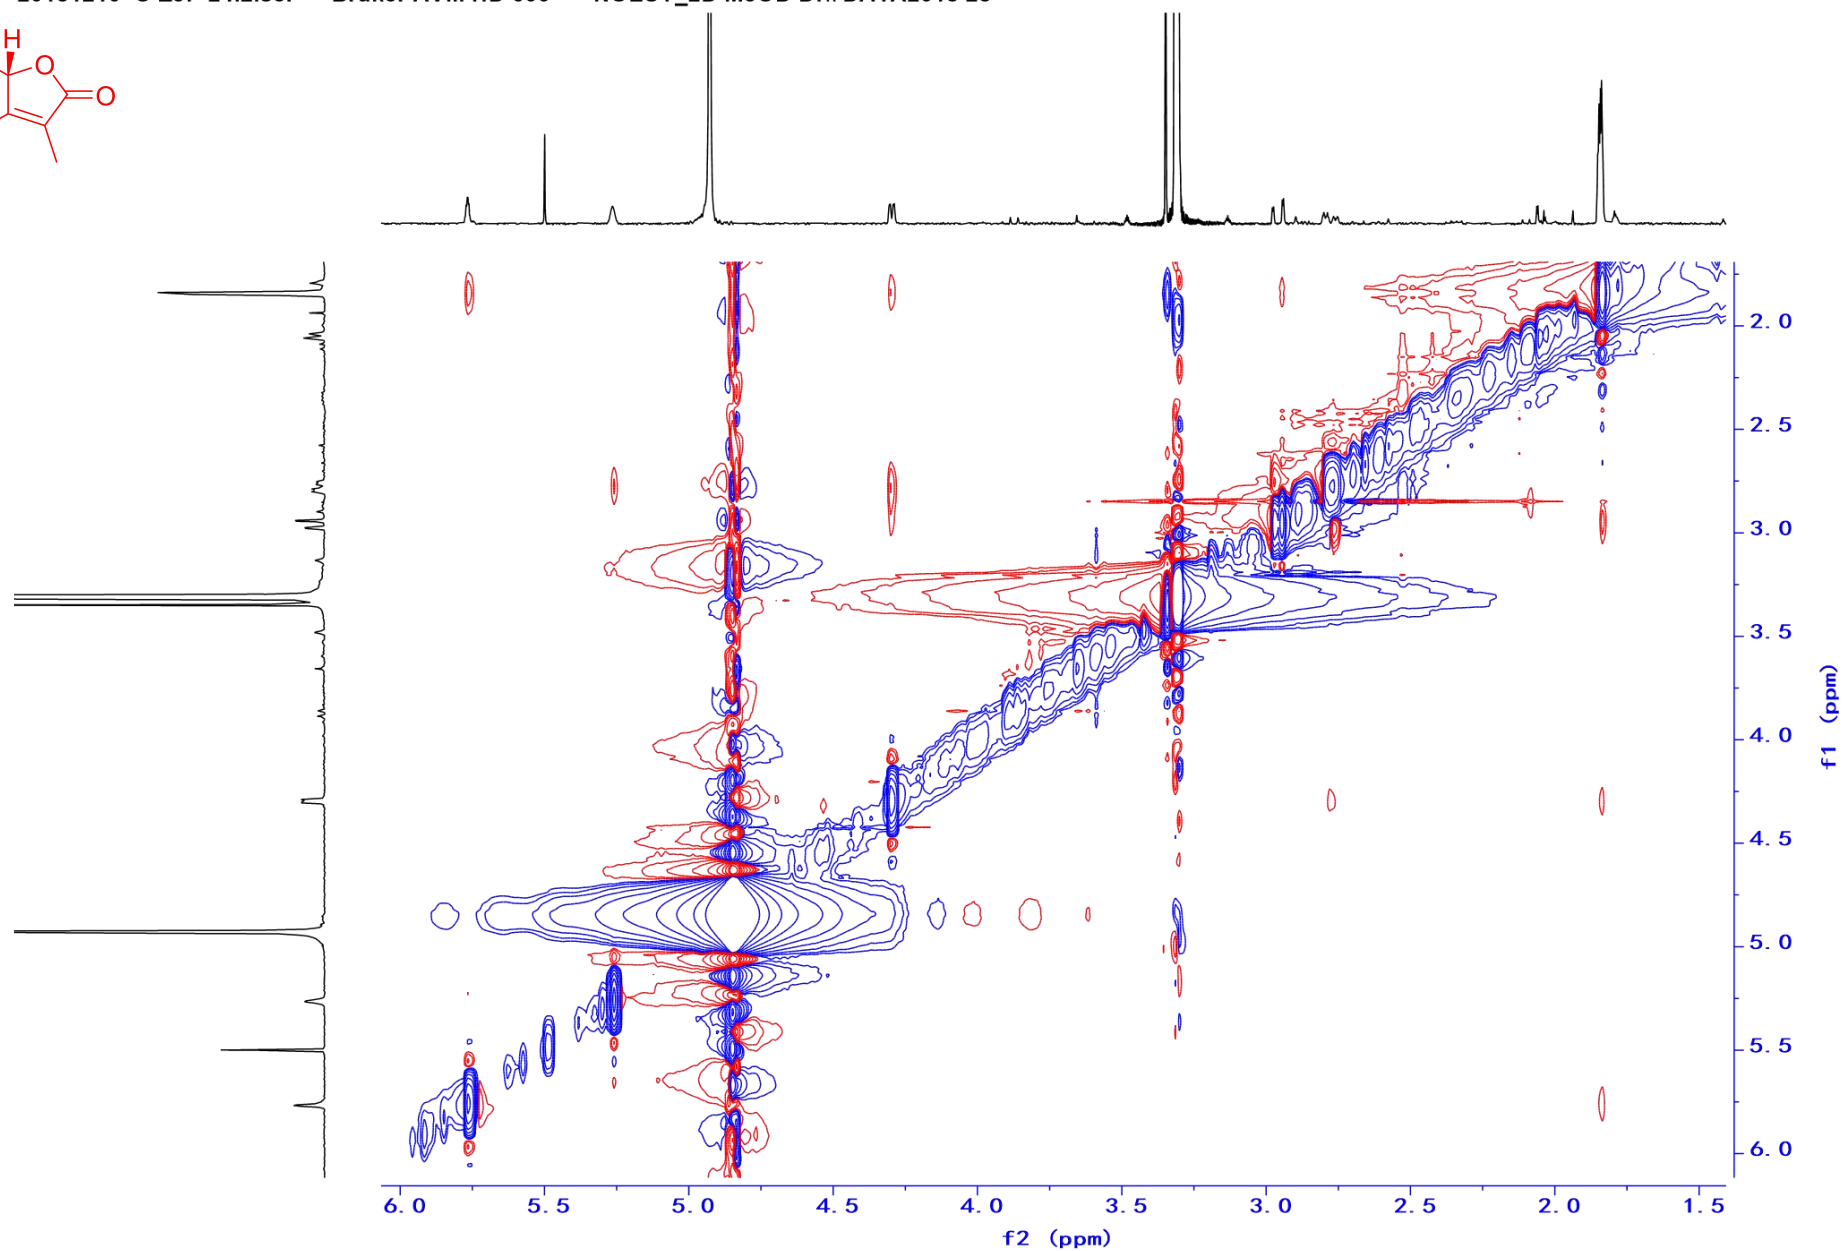

**Figure S70.** The NOESY Spectrum of Compound 8 in MeOH- $d_4$  (600MHz)

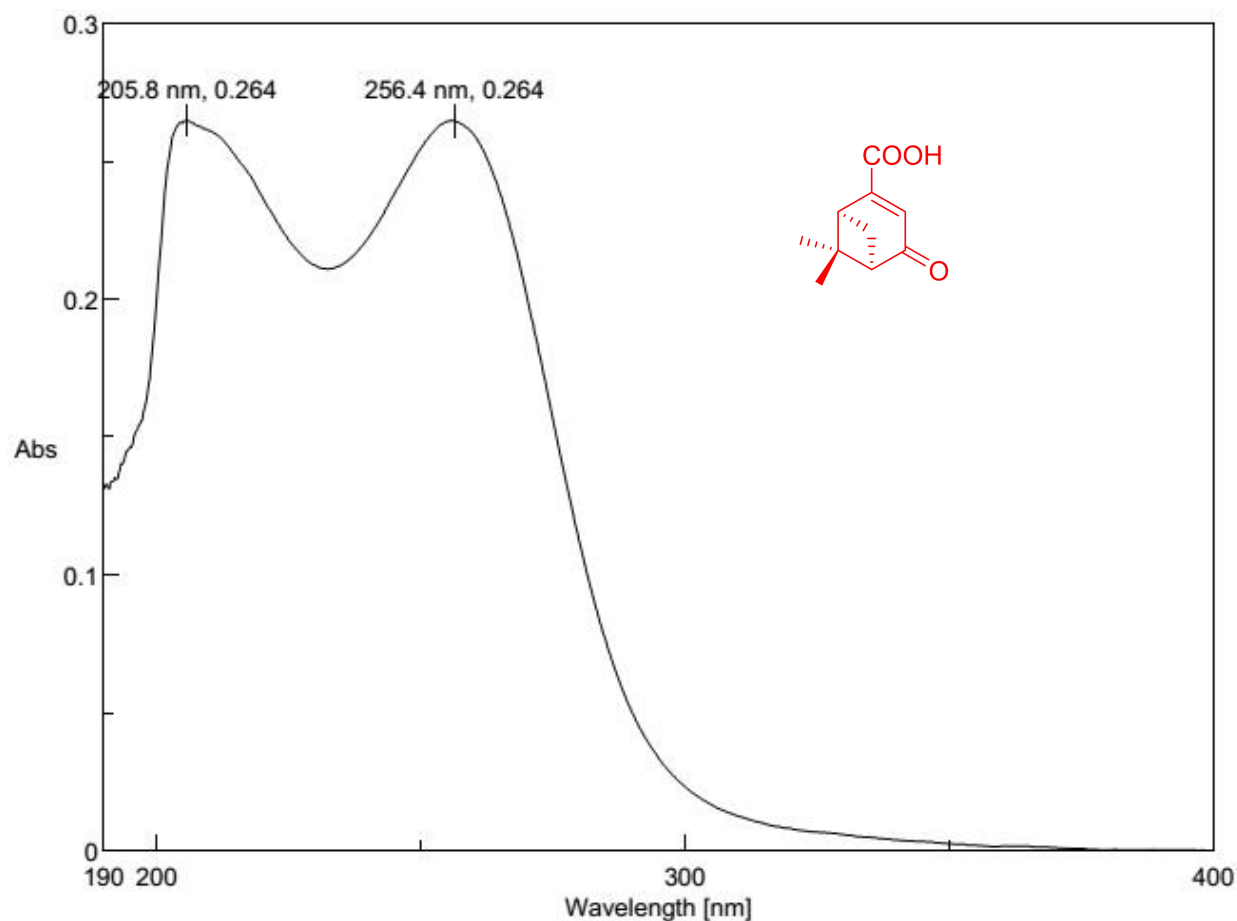

**Figure S71. The UV Spectrum of Compound 9 in MeOH**

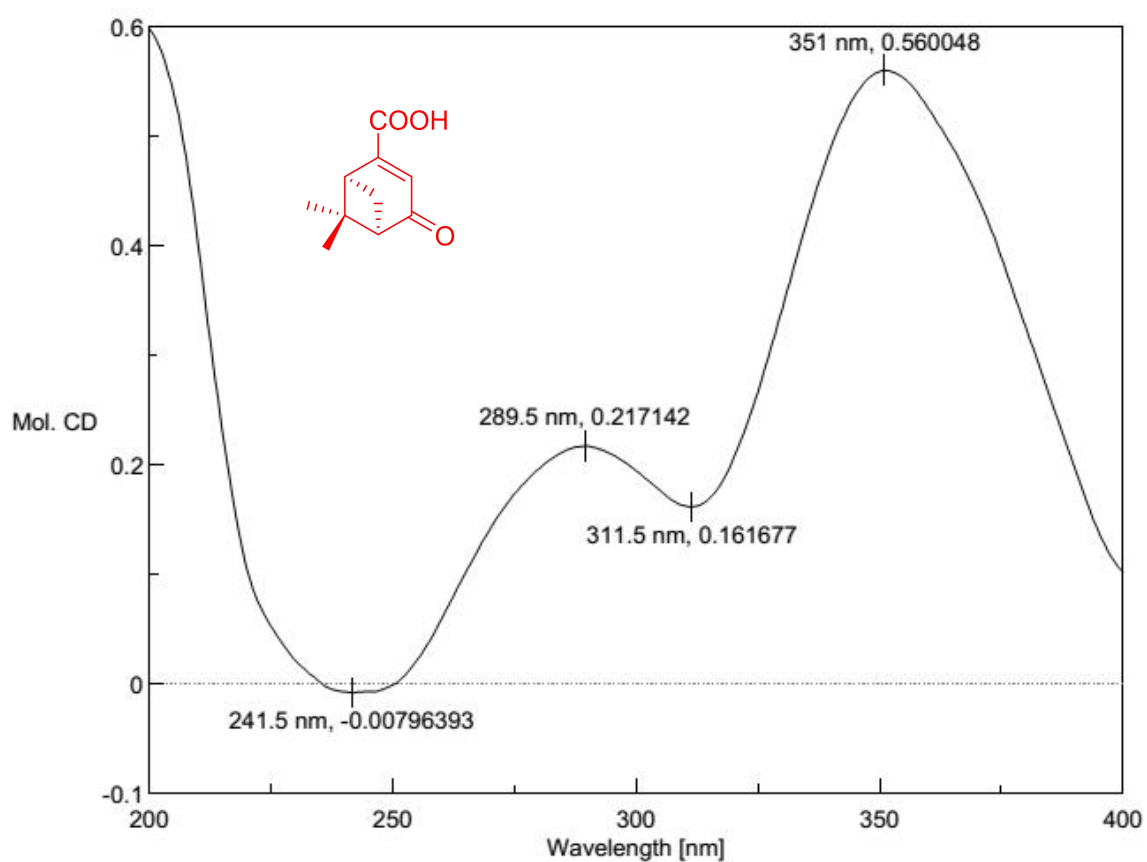

**Figure S72. The CD Spectrum of Compound 9 in MeOH**

# Thermo Qexactive Focus Report

compound NO. : 2WC2

Method : LCMS(compound)-low

RT: 0.00 - 15.02 SM: 7G

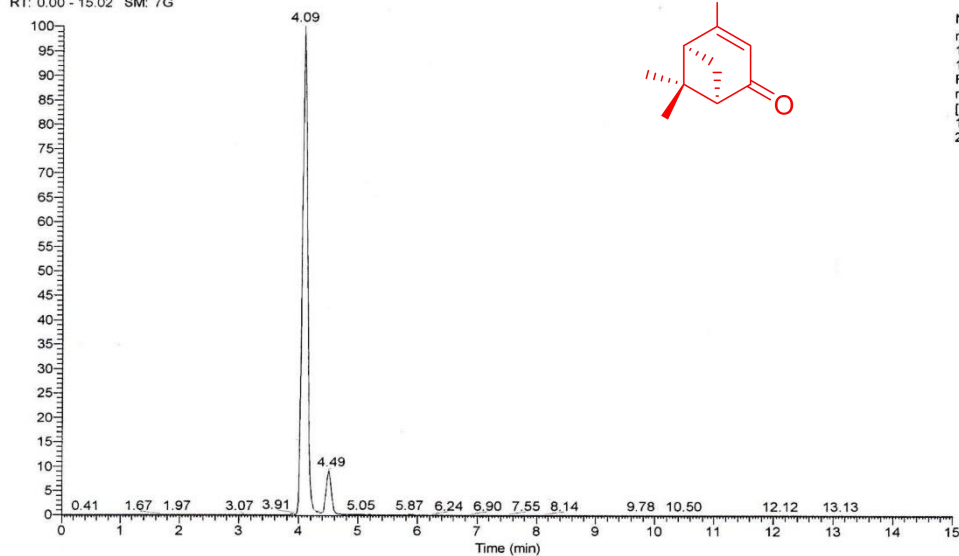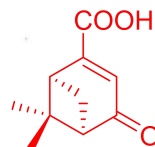

NL: 1.78E8  
m/z= 179.07043-  
179.07223 F:  
FTMS - p ESI Full  
ms  
[100.0000-  
1500.0000] MS  
2WC2

2WC2 #406 RT: 4.07 AV: 1 NL: 2.00E8  
T: FTMS - p ESI Full ms [100.0000-1500.0000]

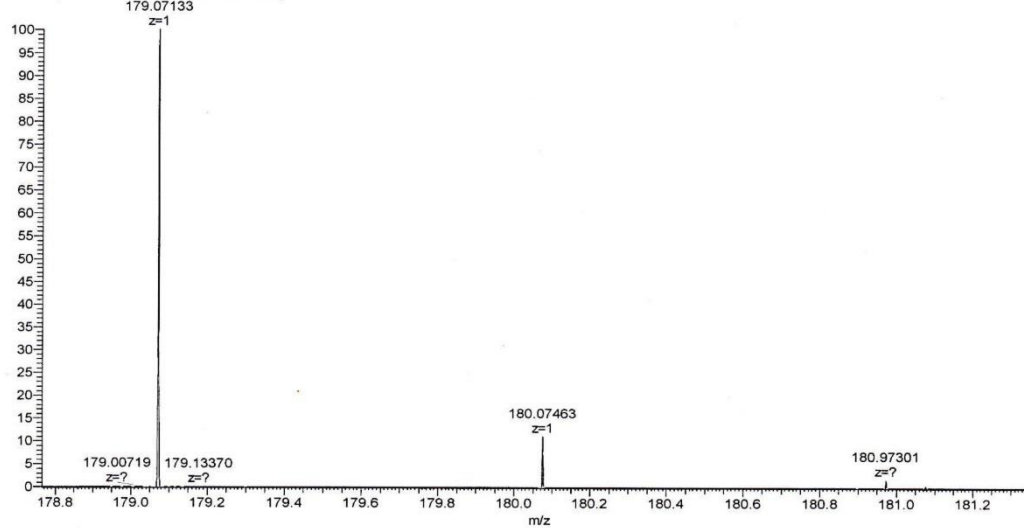

| m/z       | Theo. Mass | Delta (ppm) | RDB equiv. | Composition |     |
|-----------|------------|-------------|------------|-------------|-----|
| 179.07133 | 179.07137  | -0.21       | 5.5        | C10 H11 O3  | M-H |

**Figure S73. The HR-mass Spectrum of Compound 9 in MeOH**

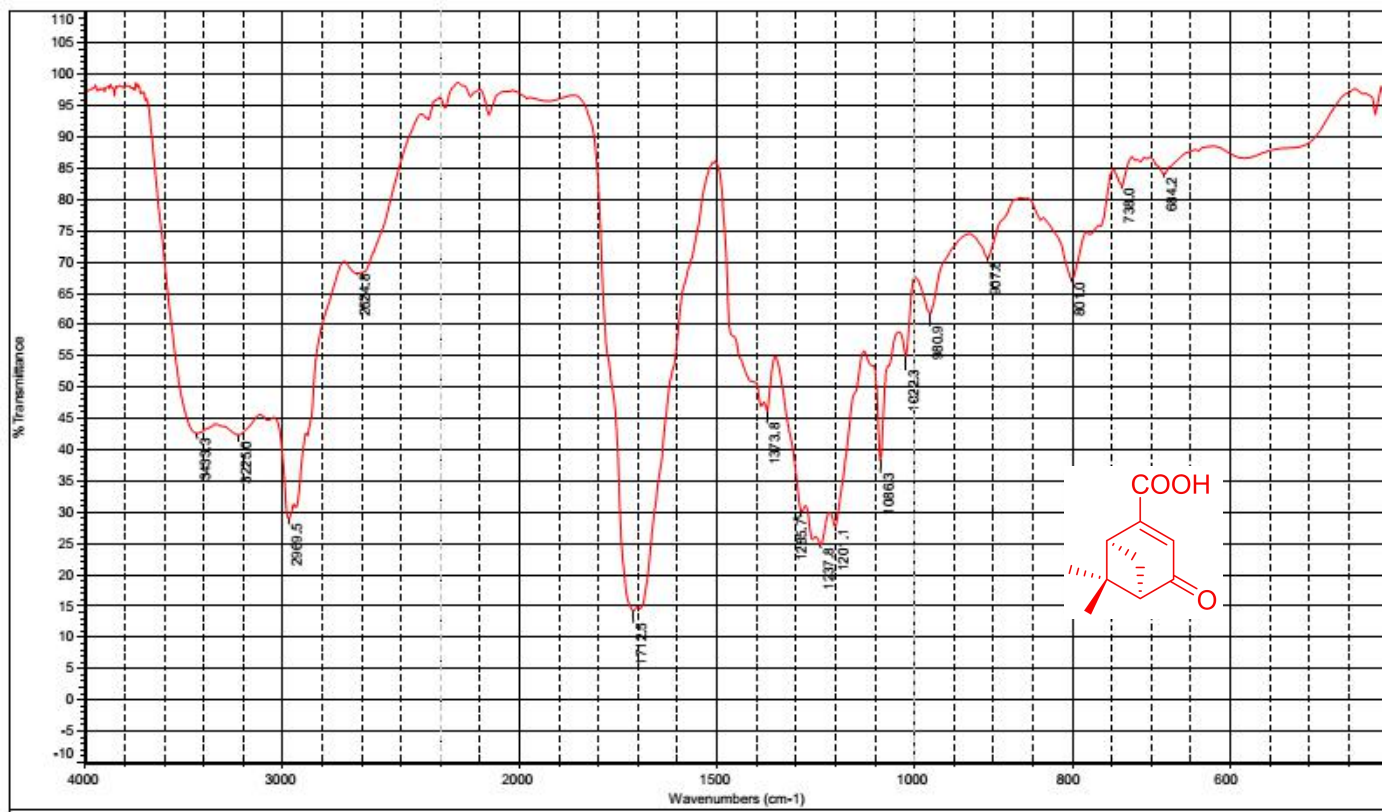

**Figure S74. The IR Spectrum of Compound 9**

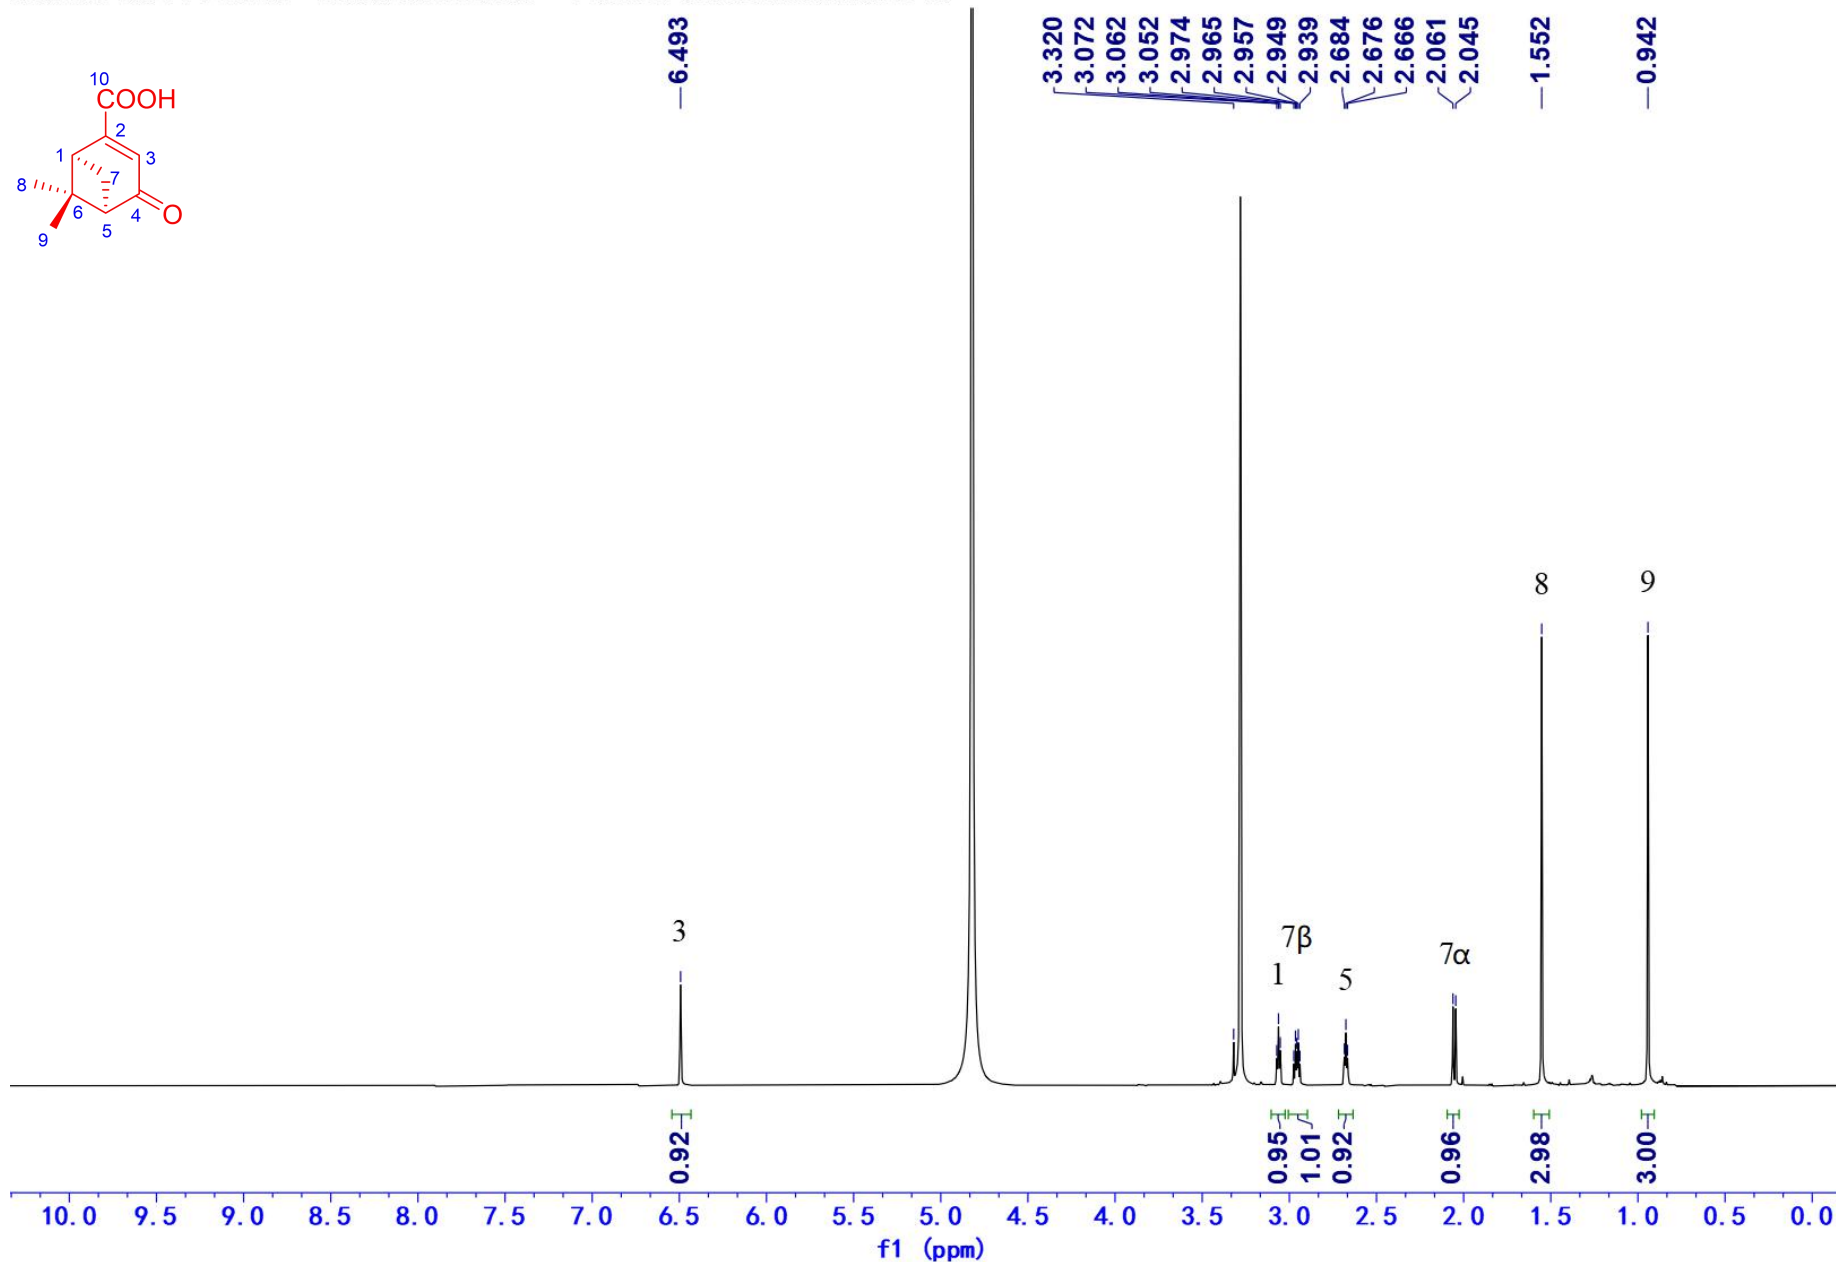

Figure S75. The  $^1\text{H}$  NMR Spectrum of Compound 9 in  $\text{MeOH-}d_4$  (600MHz)



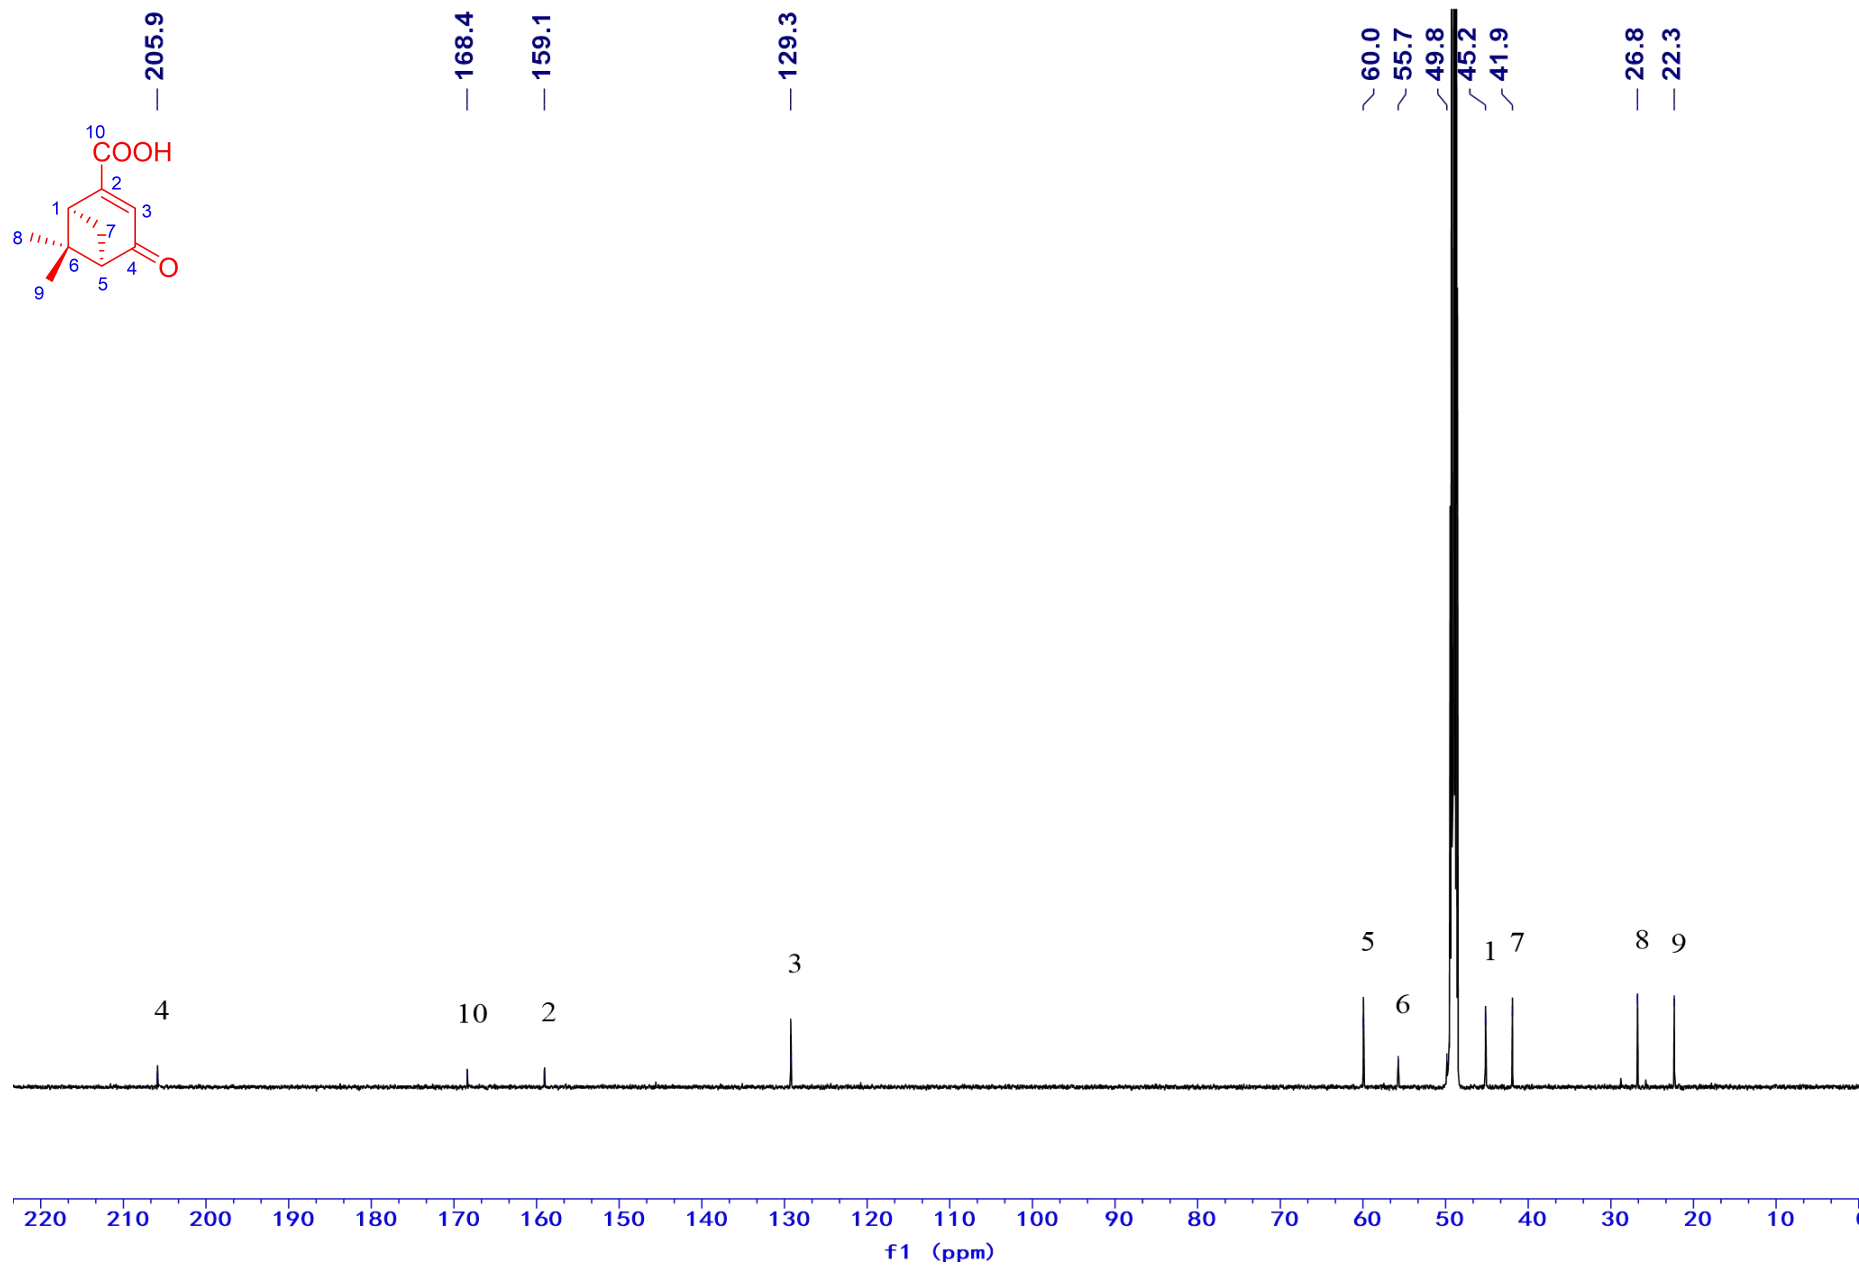

Figure S76. The  $^{13}\text{C}$  NMR Spectrum of Compound 9 in  $\text{MeOH-}d_4$  (150MHz)

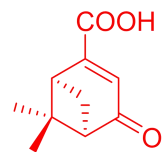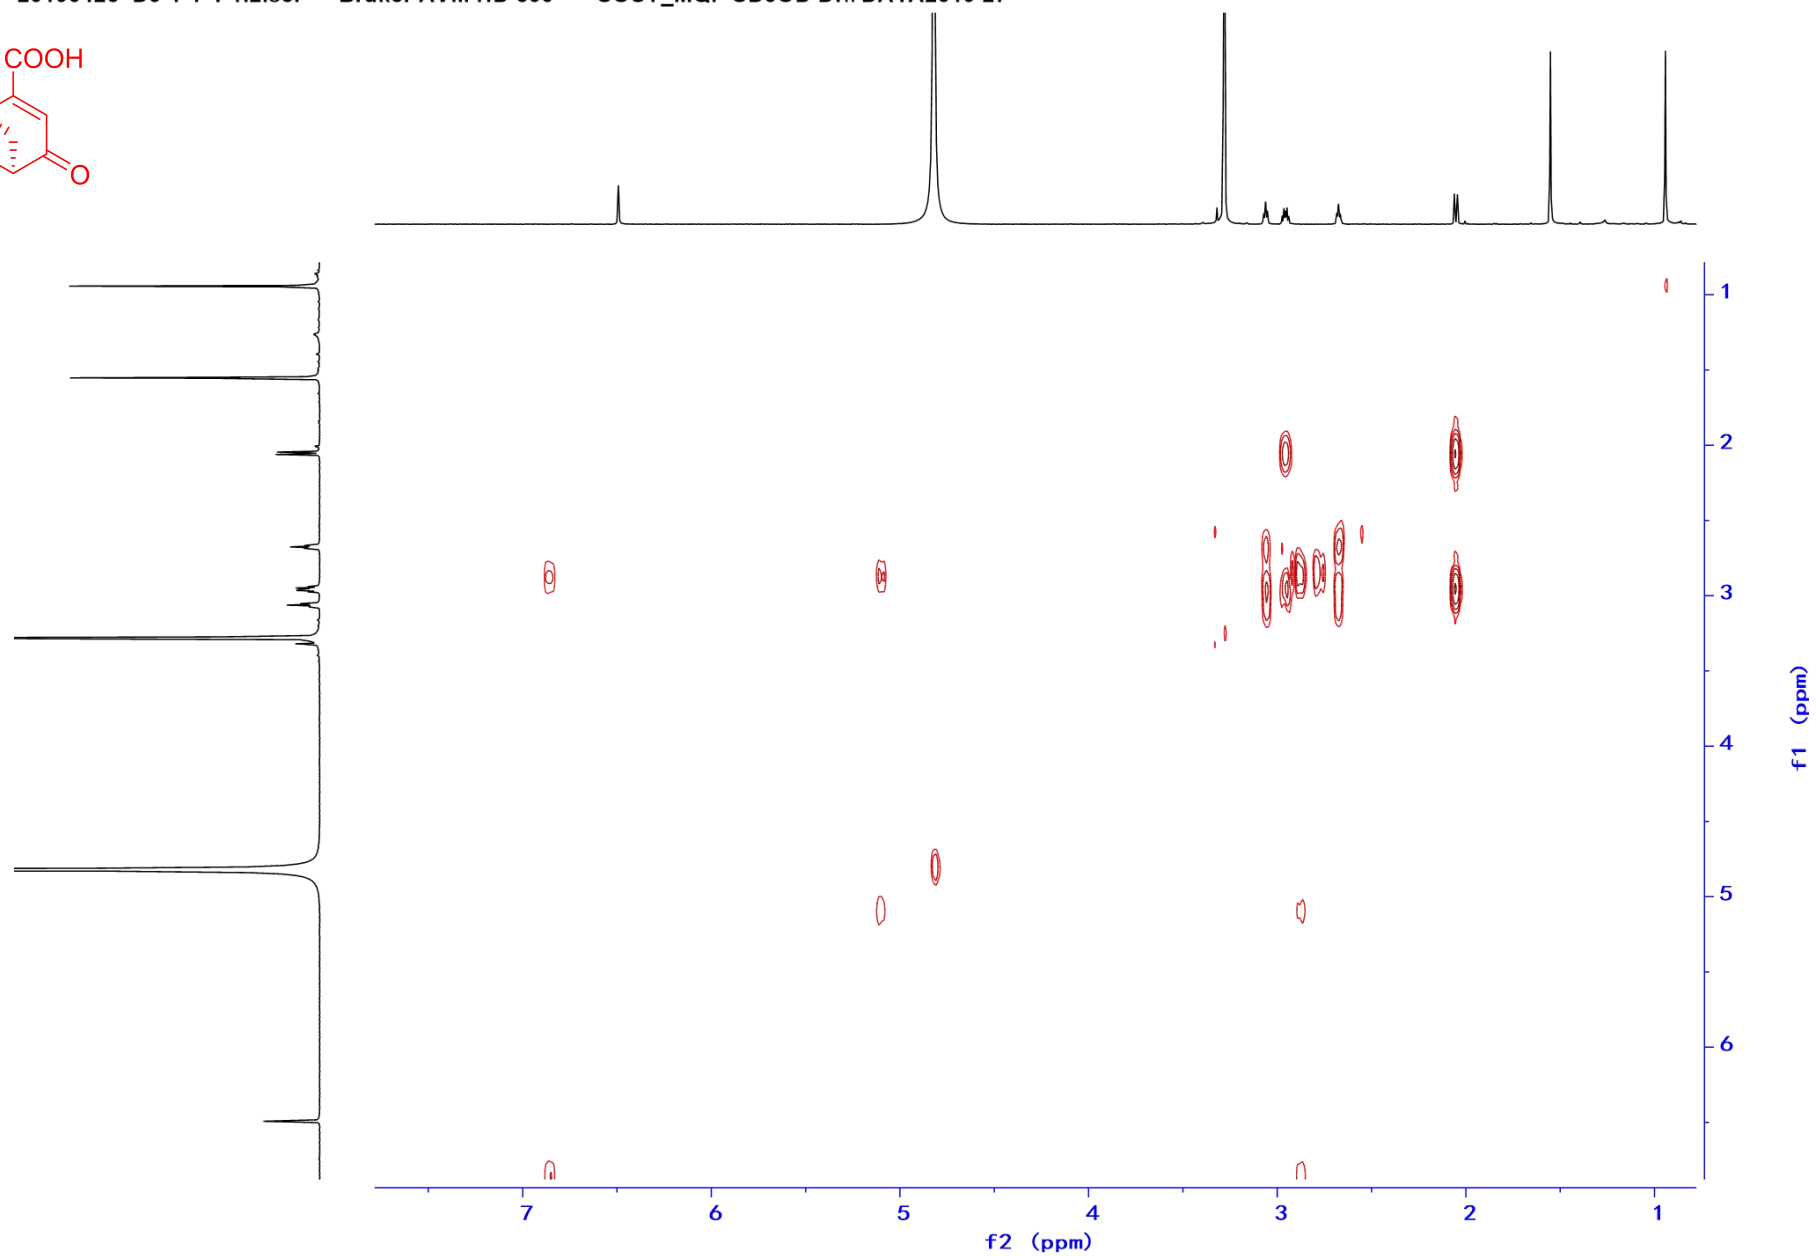

**Figure S77.** The  $^1\text{H}$ - $^1\text{H}$  COSY Spectrum of Compound 9 in  $\text{MeOH-}d_4$  (600MHz)

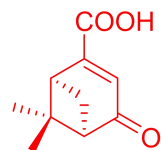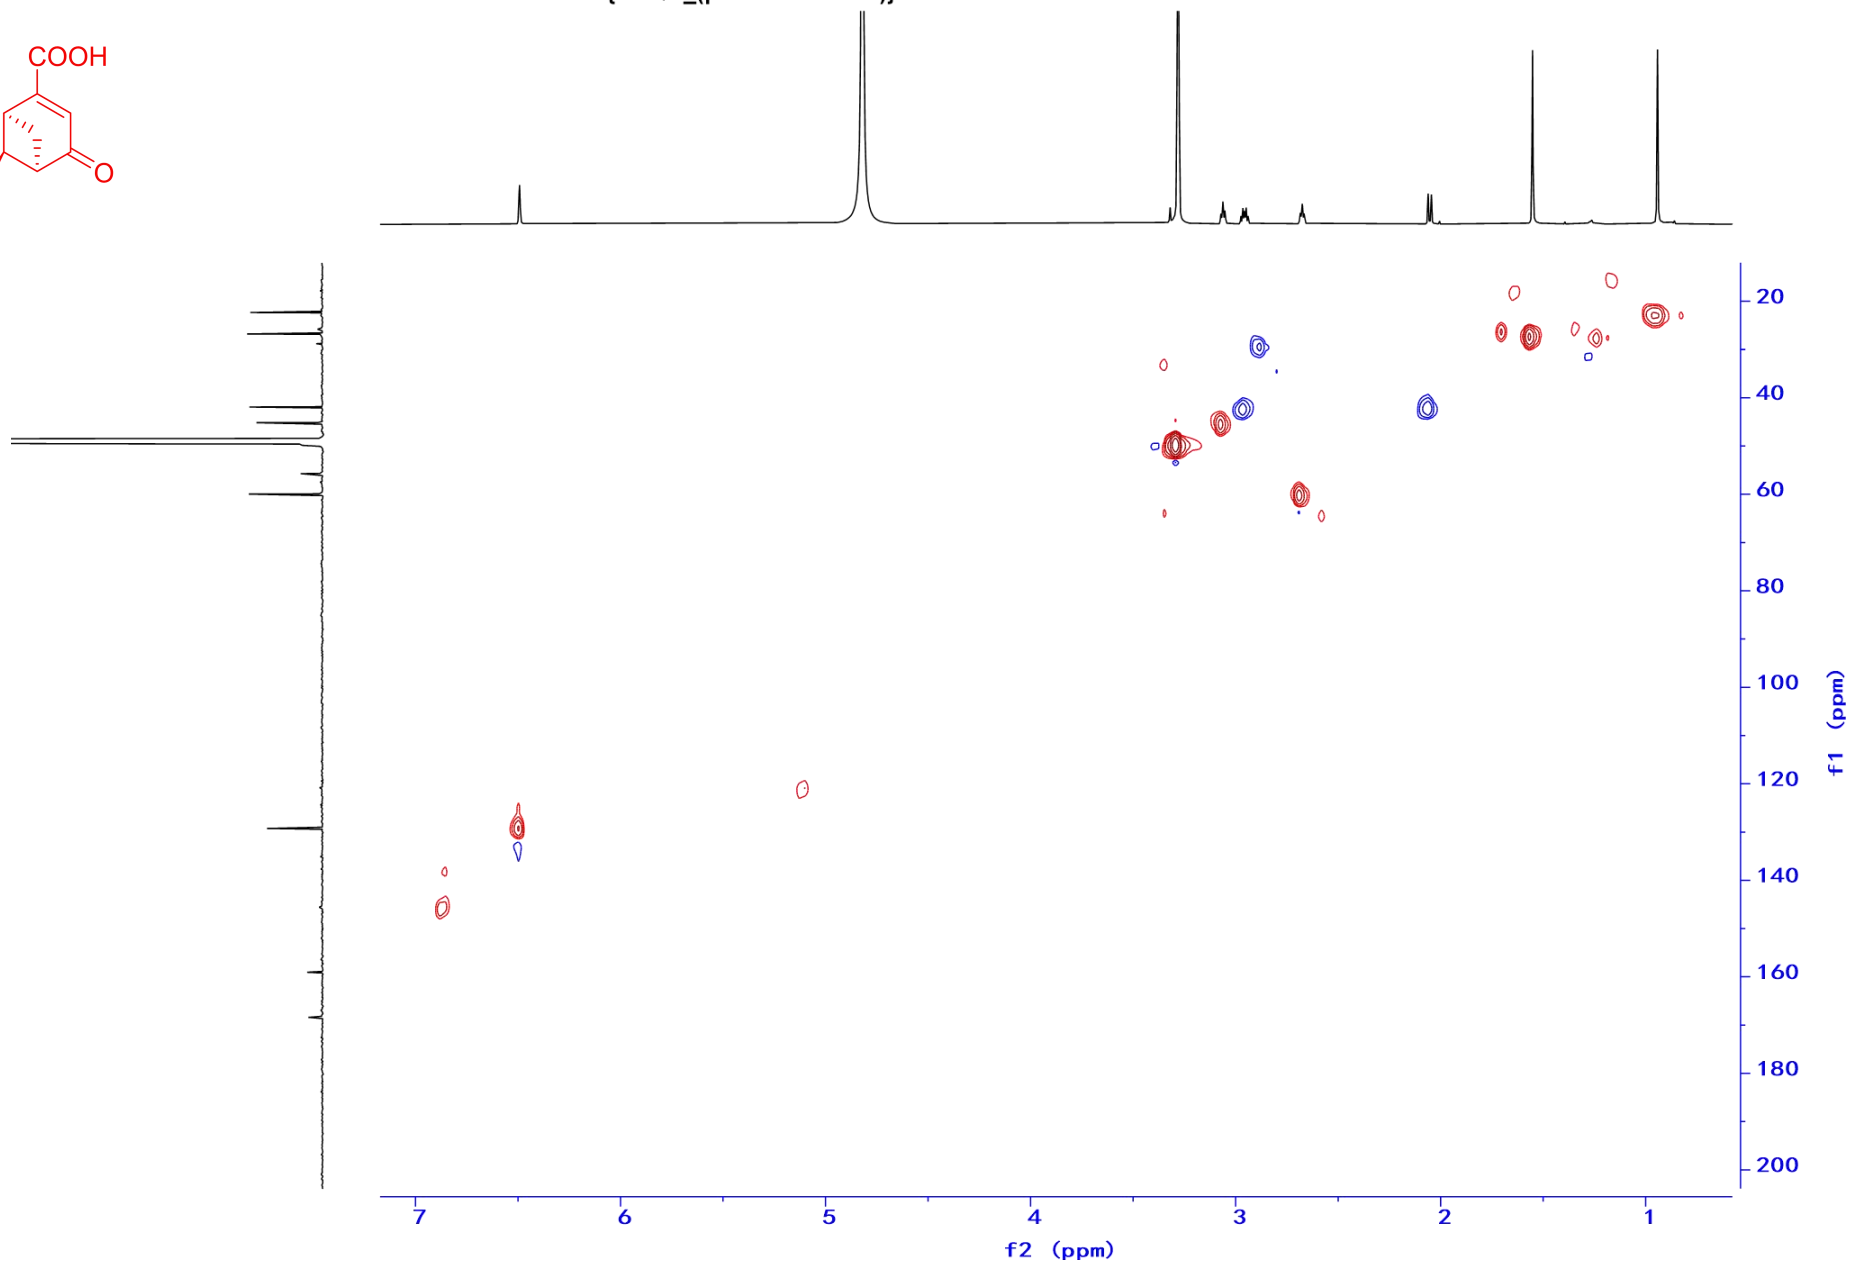

**Figure S78.** The HSQC Spectrum of Compound 9 in MeOH- $d_4$  (600MHz)

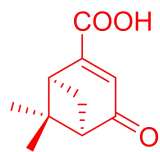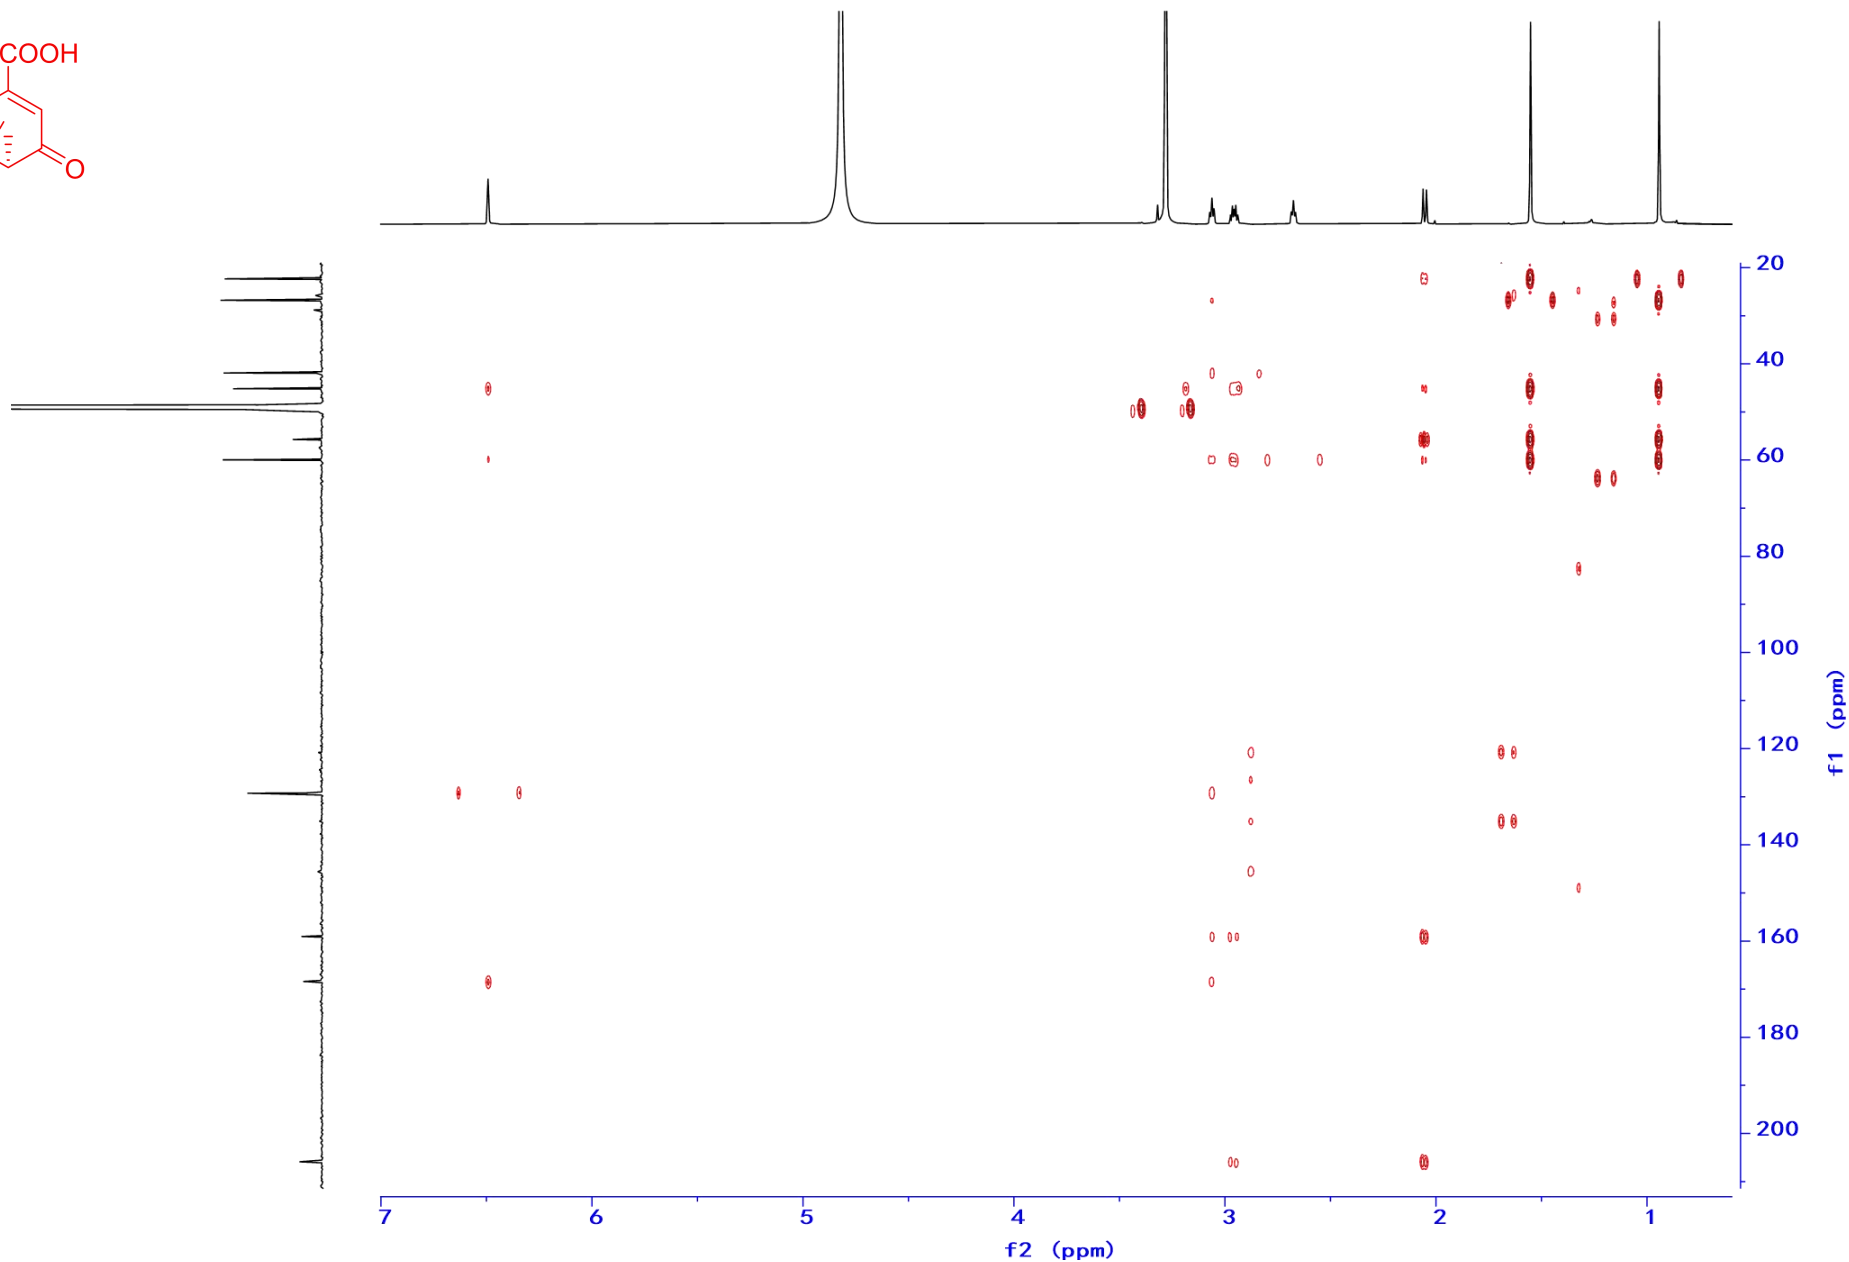

**Figure S79.** The HMBC Spectrum of Compound 9 in MeOH- $d_4$  (600MHz)

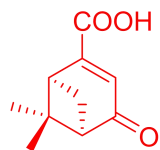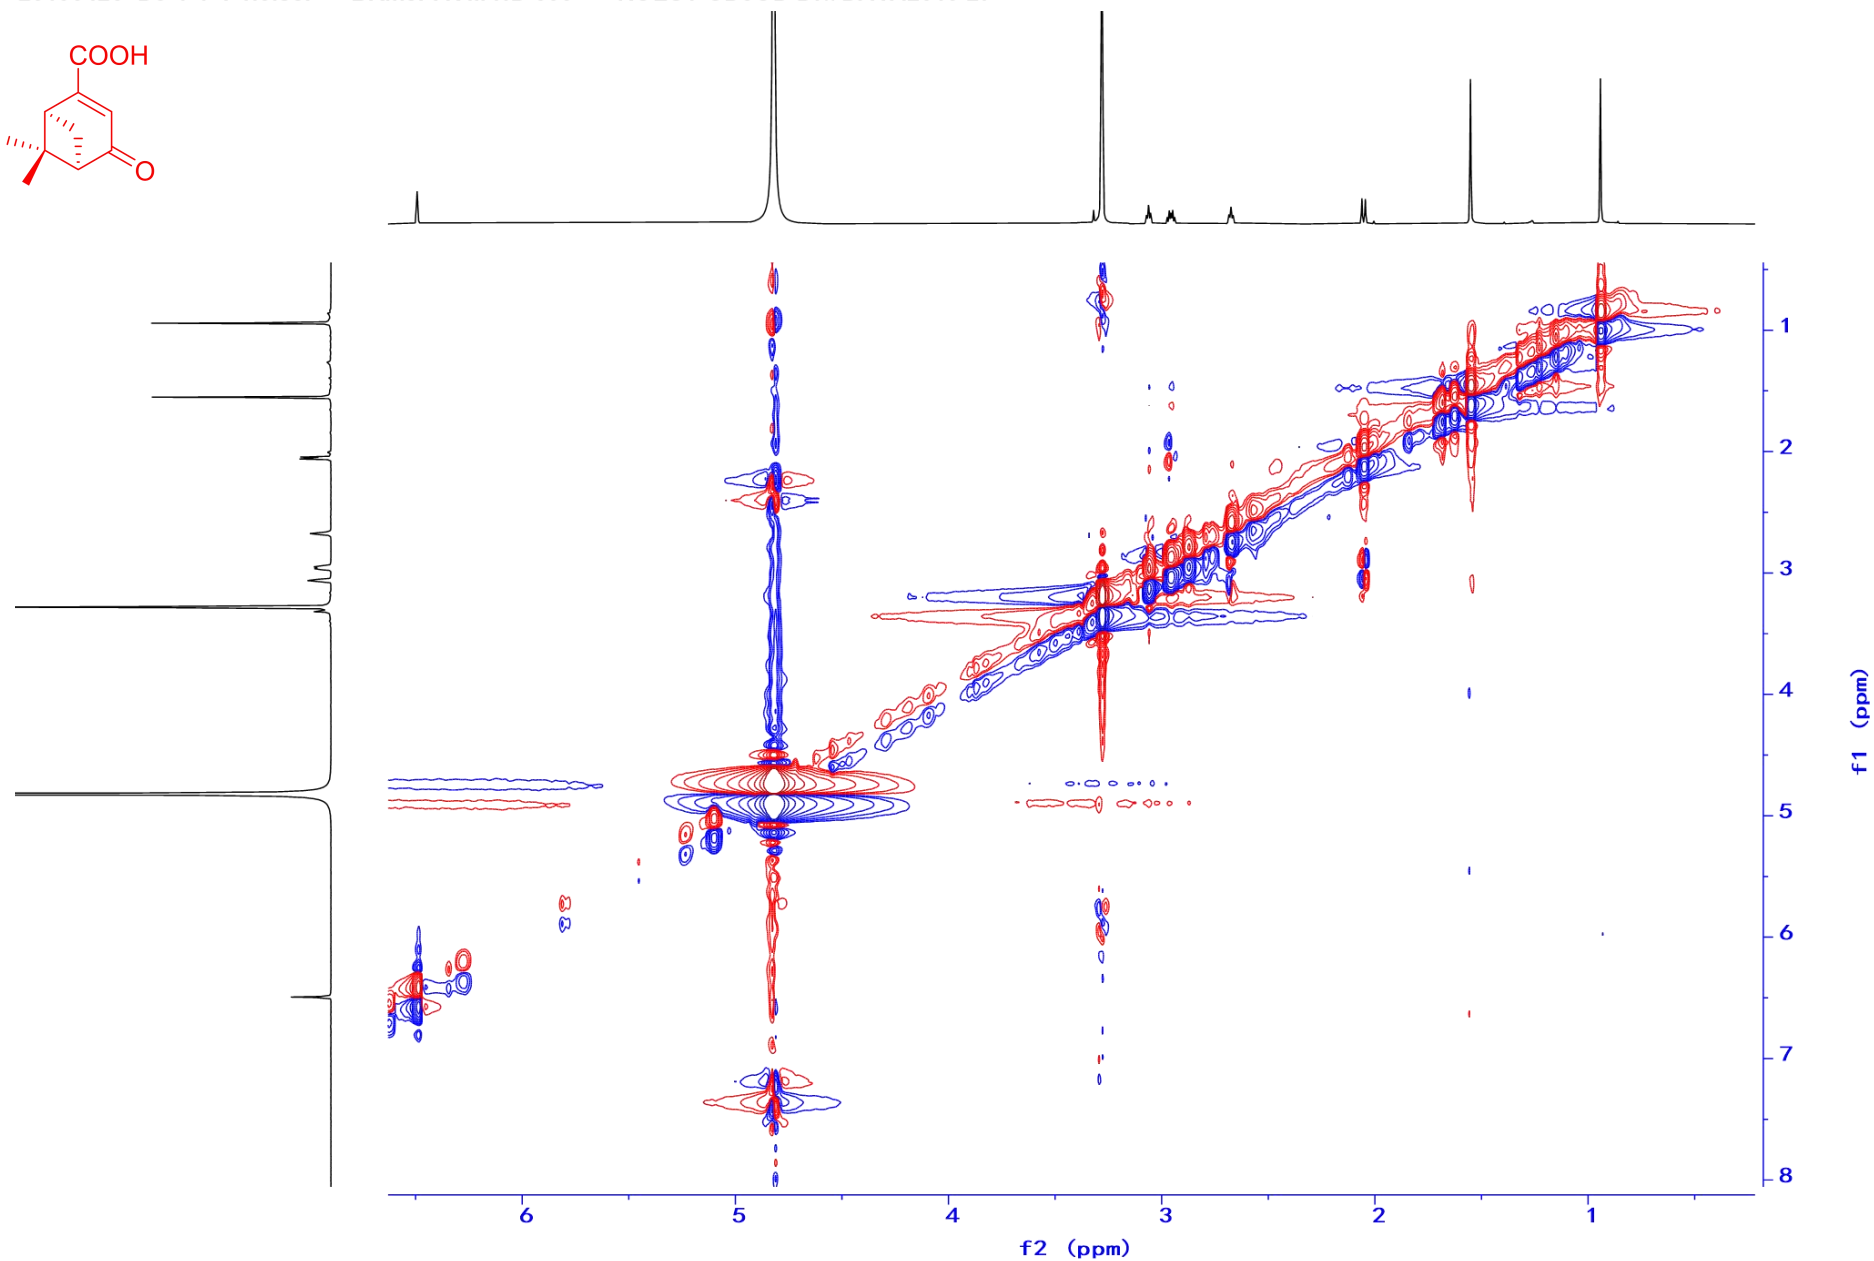

**Figure S80.** The NOESY Spectrum of Compound 9 in MeOH-*d*<sub>4</sub> (600MHz)

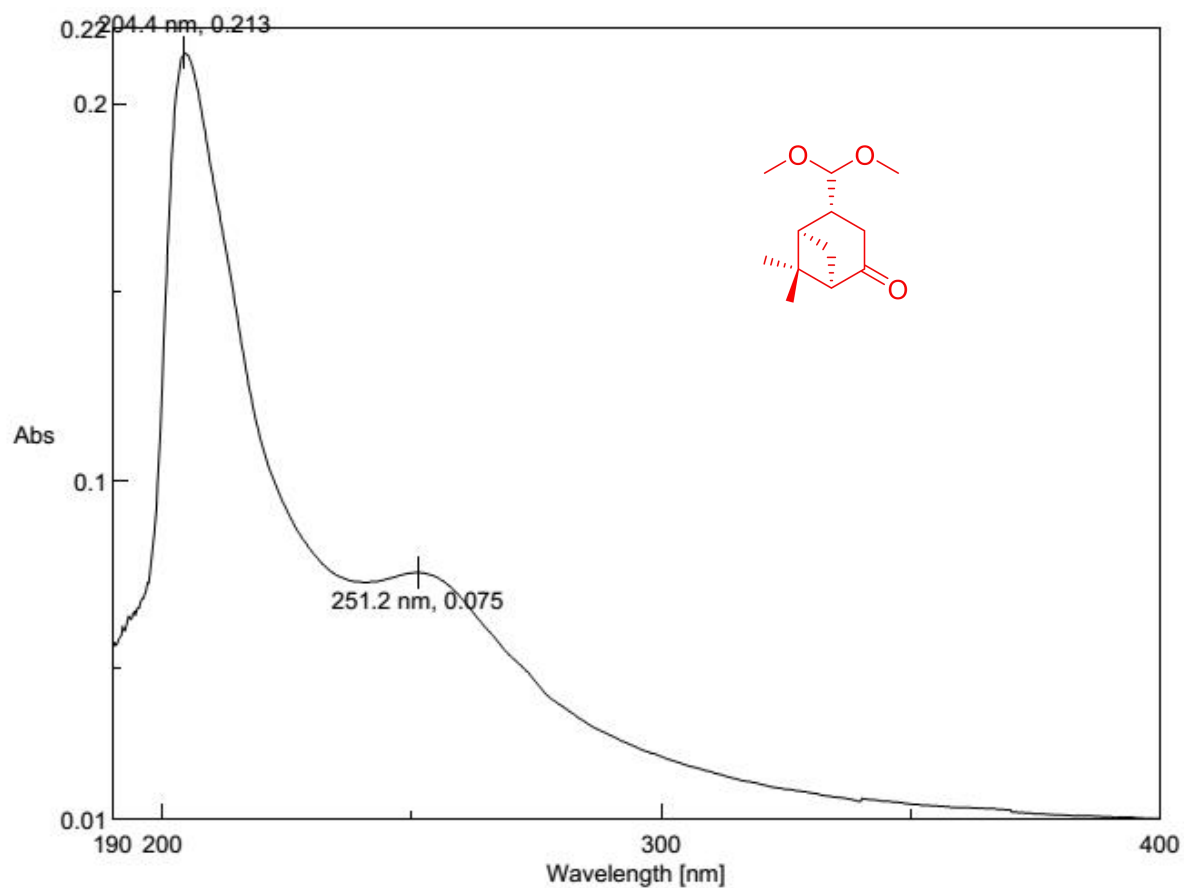

**Figure S81. The UV Spectrum of Compound 10 in MeOH**

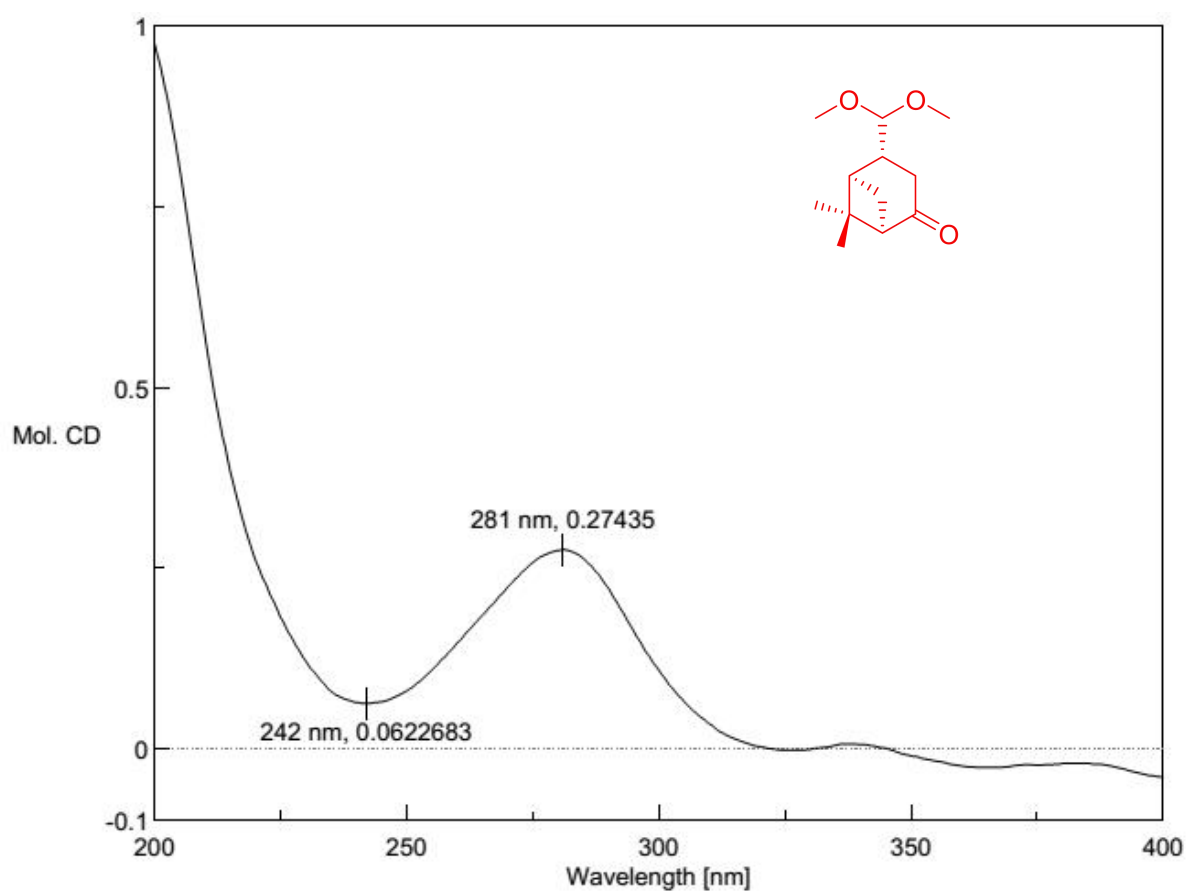

**Figure S82. The CD spectrum of Compound 10 in MeOH**

# Thermo Qexactive Focus Report

compound NO. : 2WC1

Method : LCMS(compound)-low

RT: 0.00 - 15.02 SM: 7G

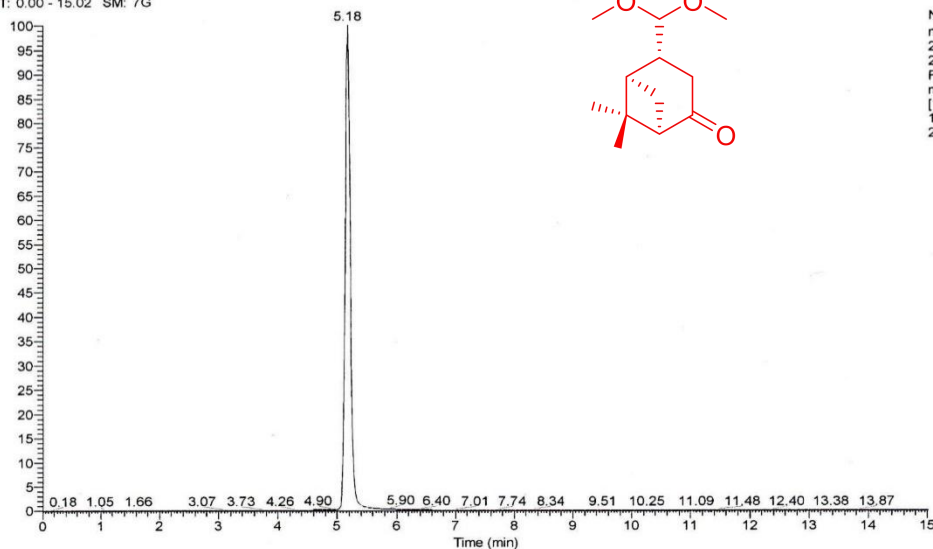

NL: 3.00E8  
m/z= 235.12981-  
235.13217 F:  
FTMS + p ESI Full  
ms  
[100.0000-  
1500.0000] MS  
2WC1

2WC1 #517 RT: 5.18 AV: 1 NL: 3.68E8  
T: FTMS + p ESI Full ms [100.0000-1500.0000]

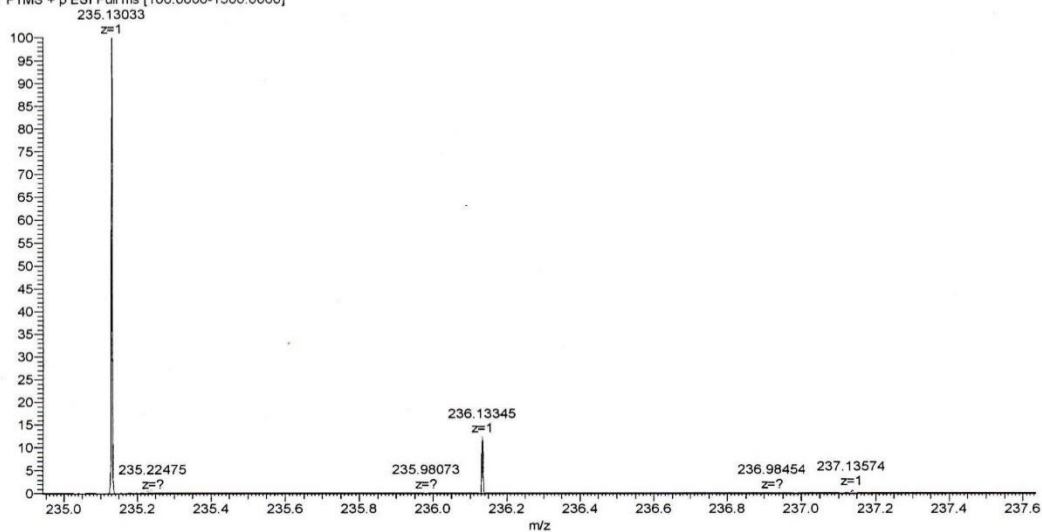

| m/z       | Theo. Mass | Delta (ppm) | RDB equiv. | Composition   |      |
|-----------|------------|-------------|------------|---------------|------|
| 235.13033 | 235.13047  | -0.58       | 2.5        | C12 H20 O3 Na | M+Na |

**Figure S83. The HR-mass Spectrum of Compound 10 in MeOH**

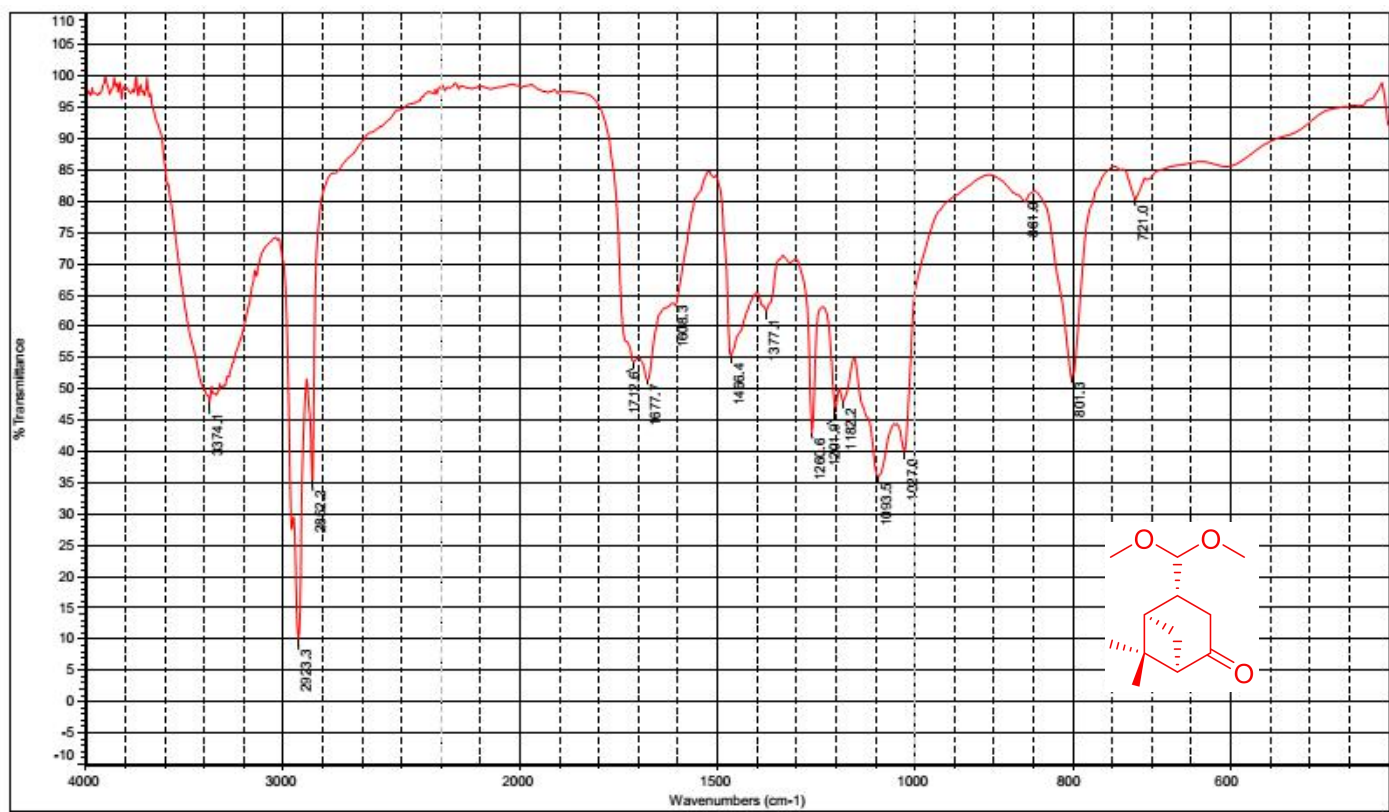

**Figure S84. The IR Spectrum of Compound 10**



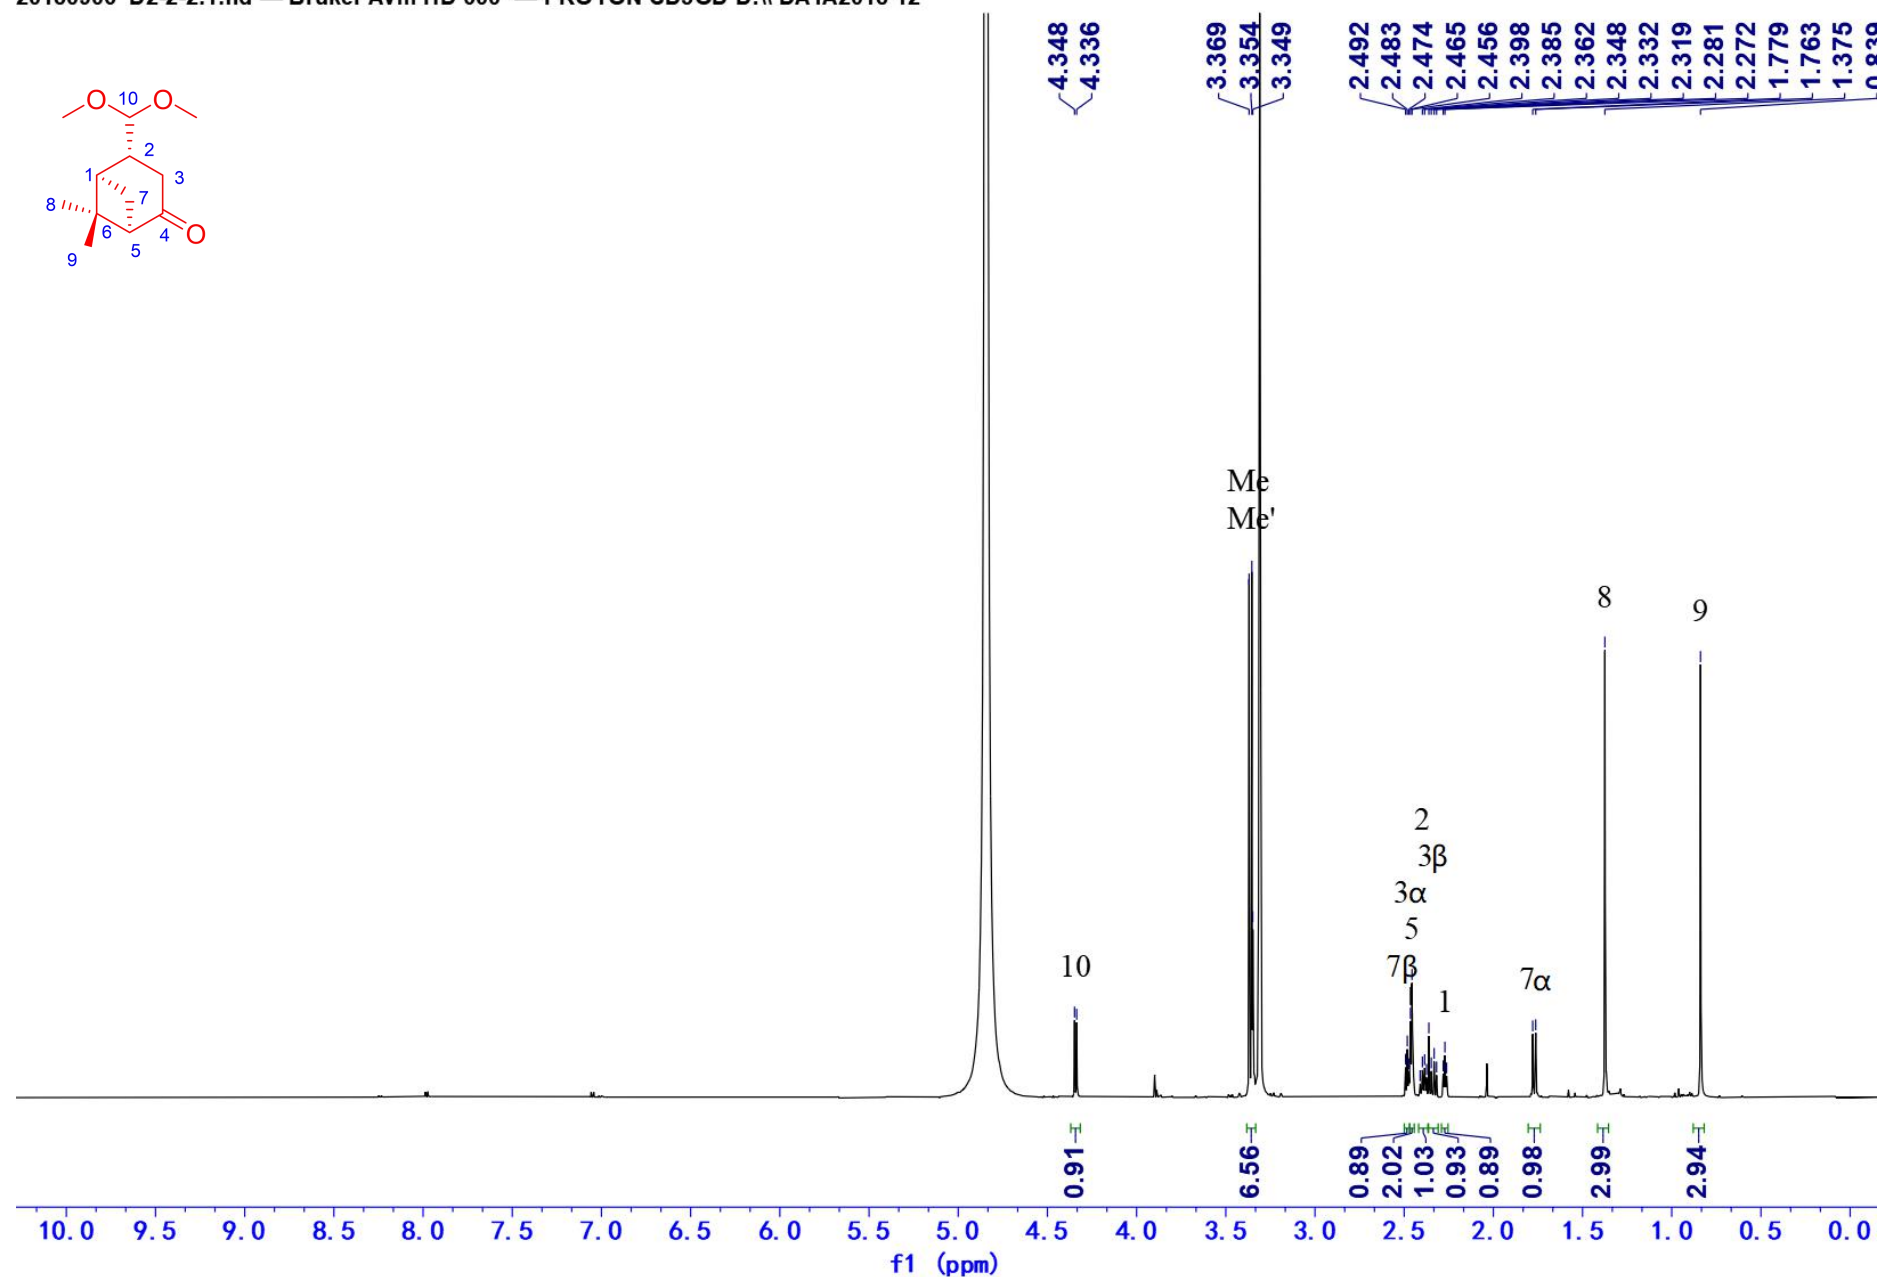

Figure S85. The  $^1\text{H}$  NMR Spectrum of Compound 10 in MeOH- $d_4$  (600MHz)

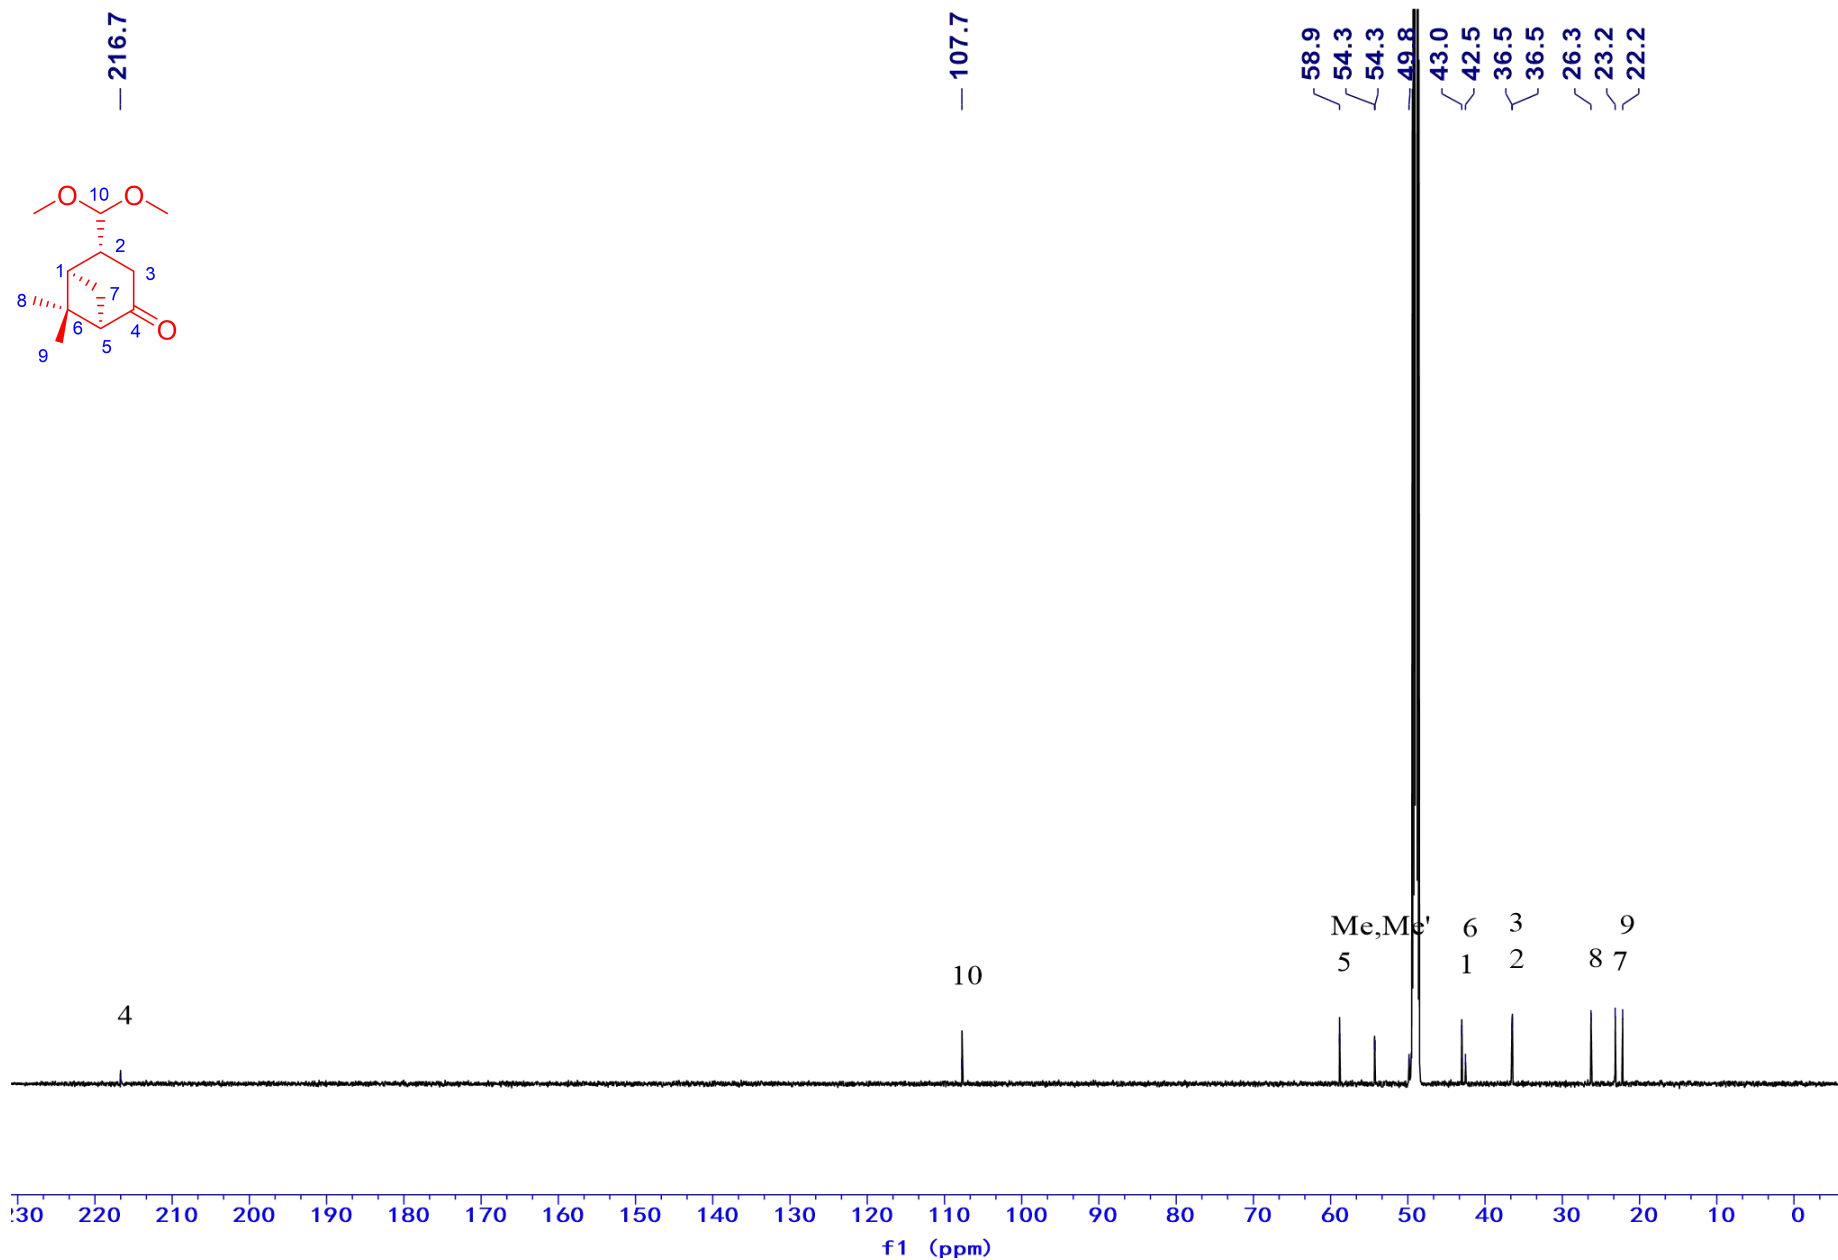

Figure S86. The <sup>13</sup>C NMR Spectrum of Compound 10 in MeOH-*d*<sub>4</sub> (150MHz)

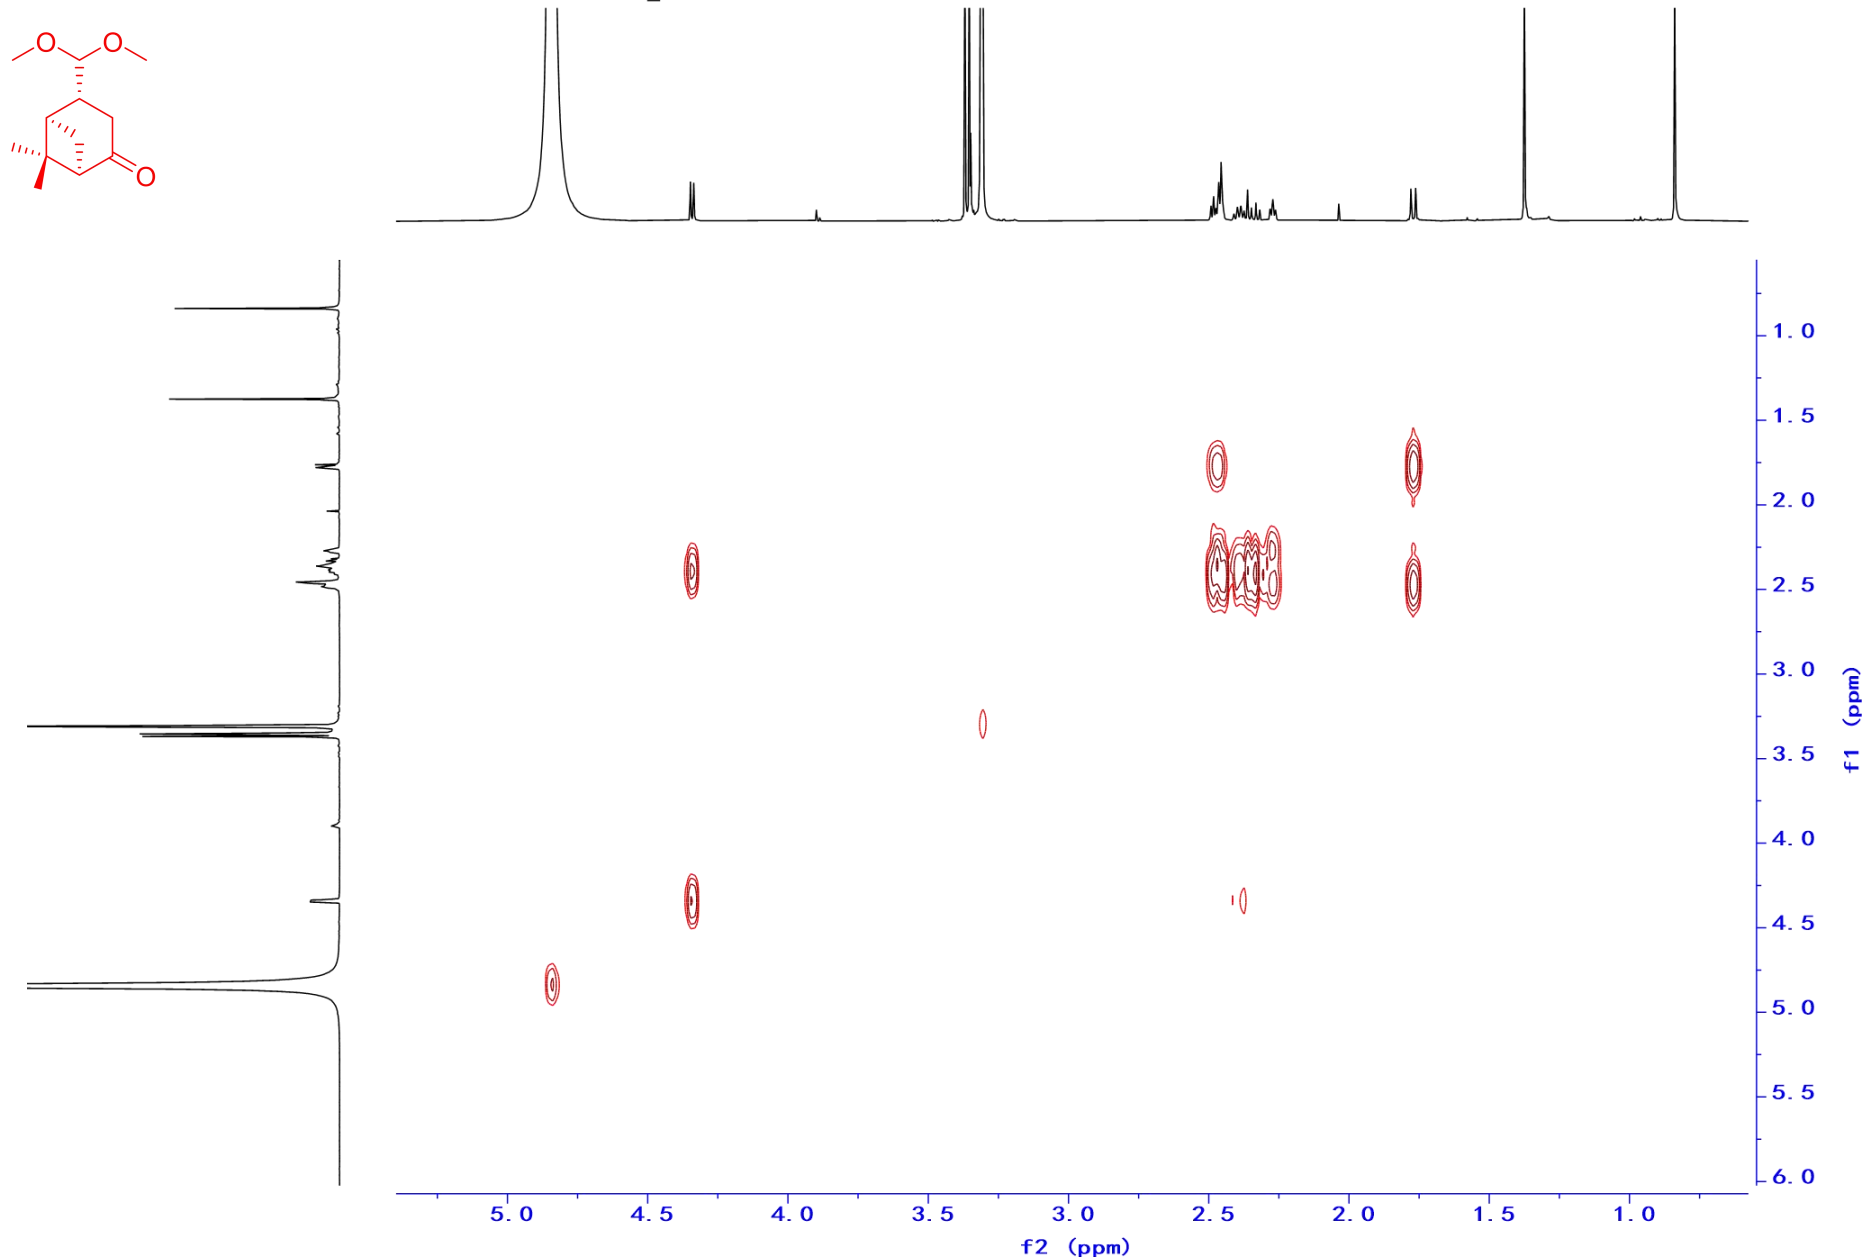

**Figure S87.** The  $^1\text{H}$ - $^1\text{H}$  COSY Spectrum of Compound 10 in  $\text{MeOH-}d_4$  (600MHz)

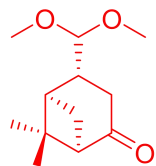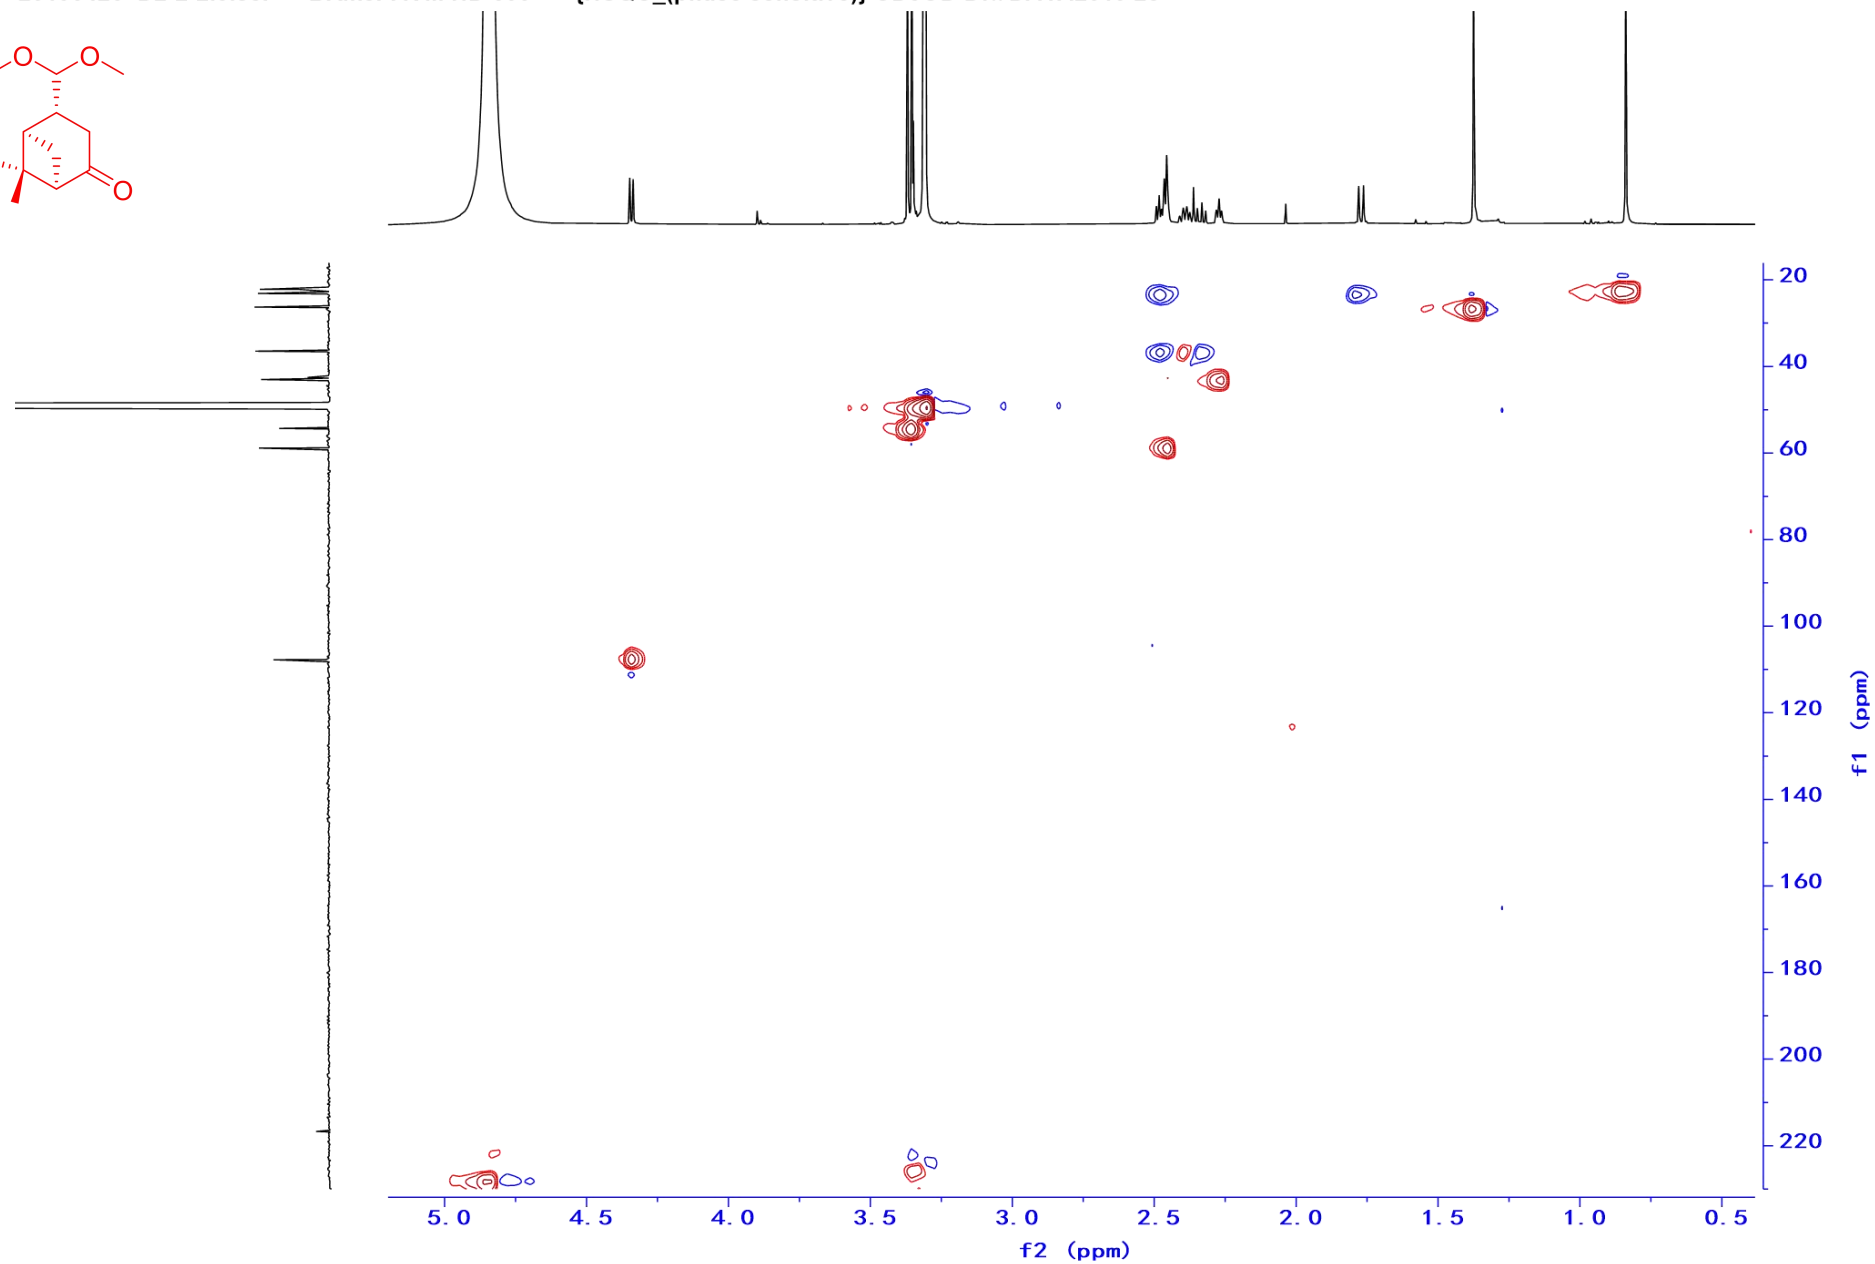

**Figure S88.** The HSQC Spectrum of Compound 10 in MeOH-*d*<sub>4</sub> (600MHz)

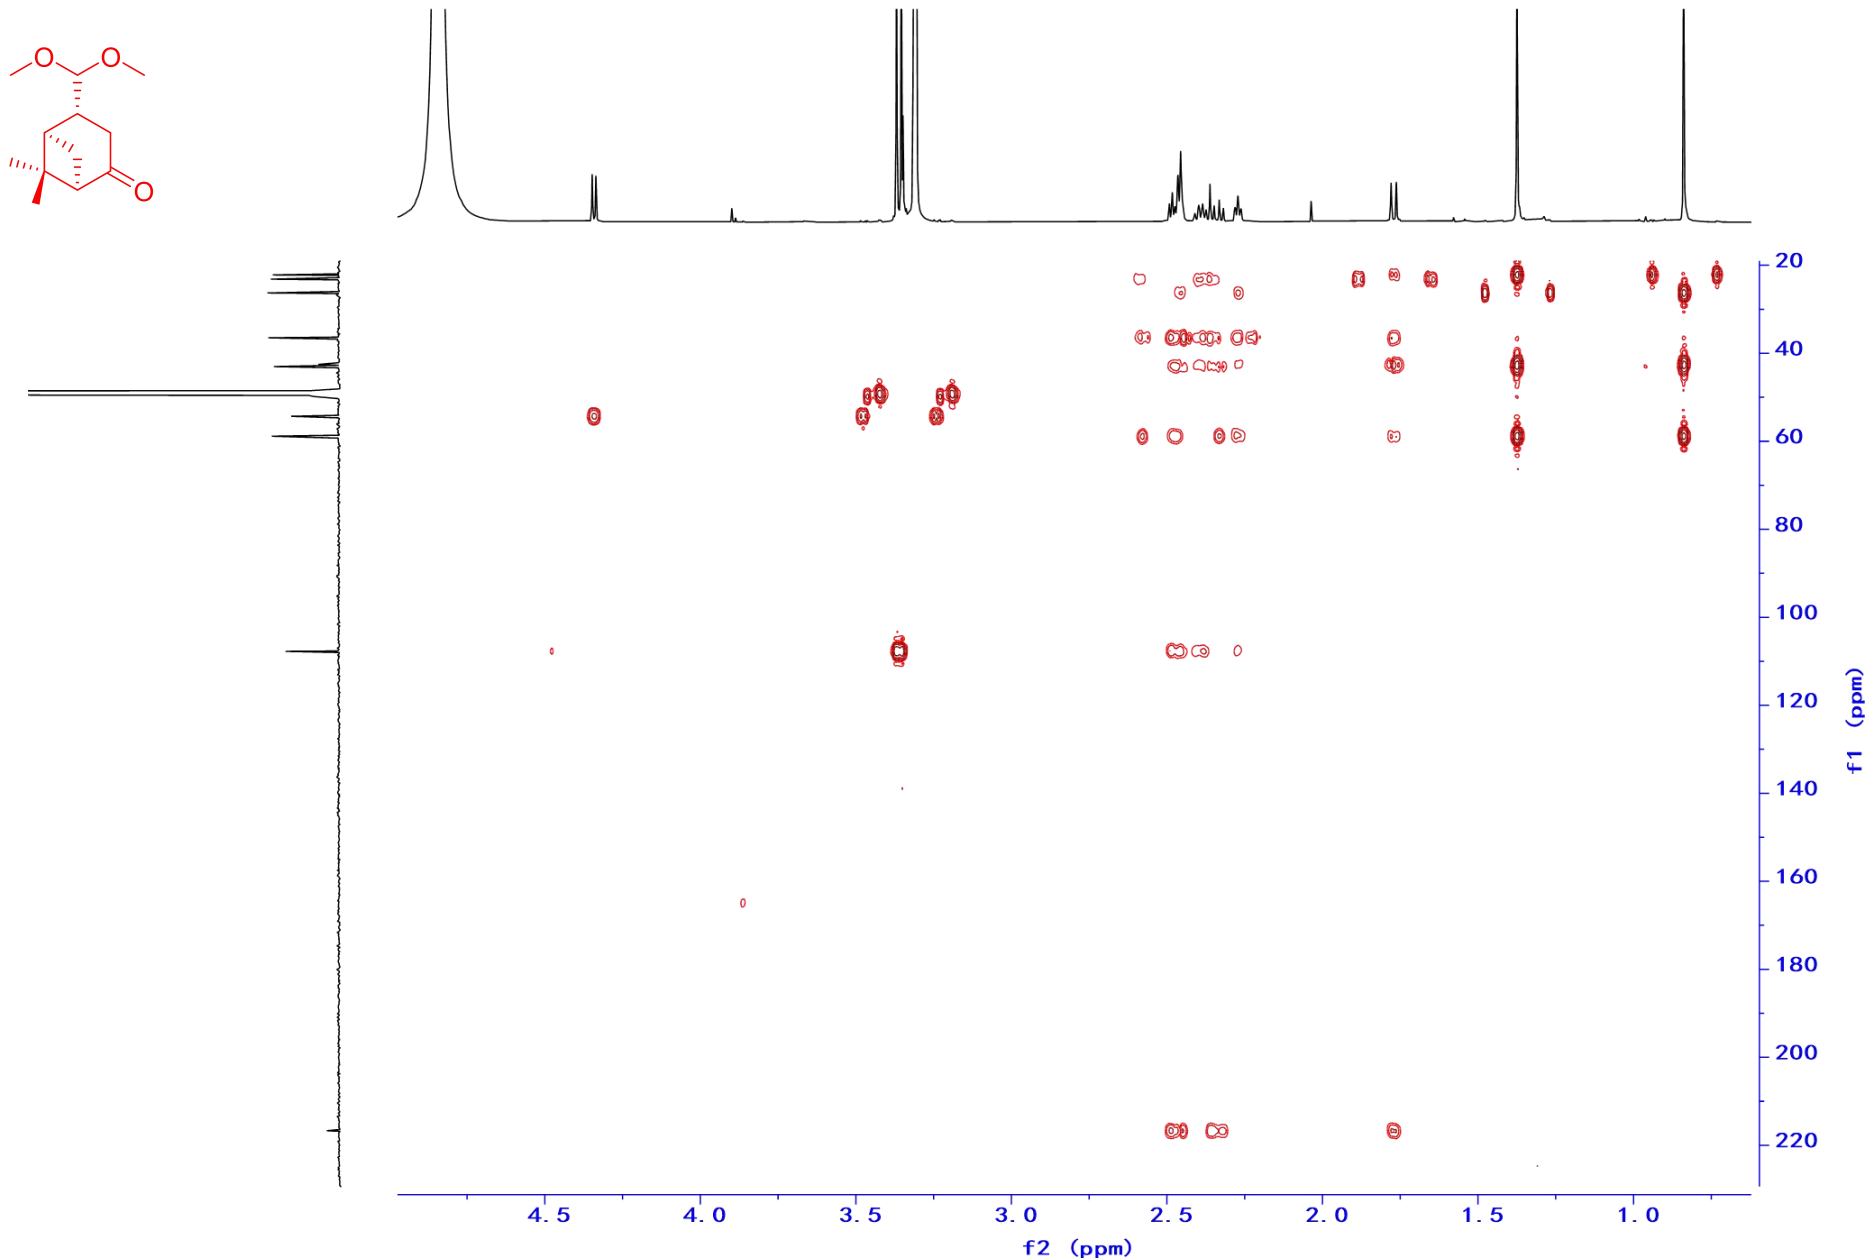

**Figure S89.** The HMBC Spectrum of Compound 10 in MeOH-*d*<sub>4</sub> (600MHz)

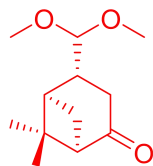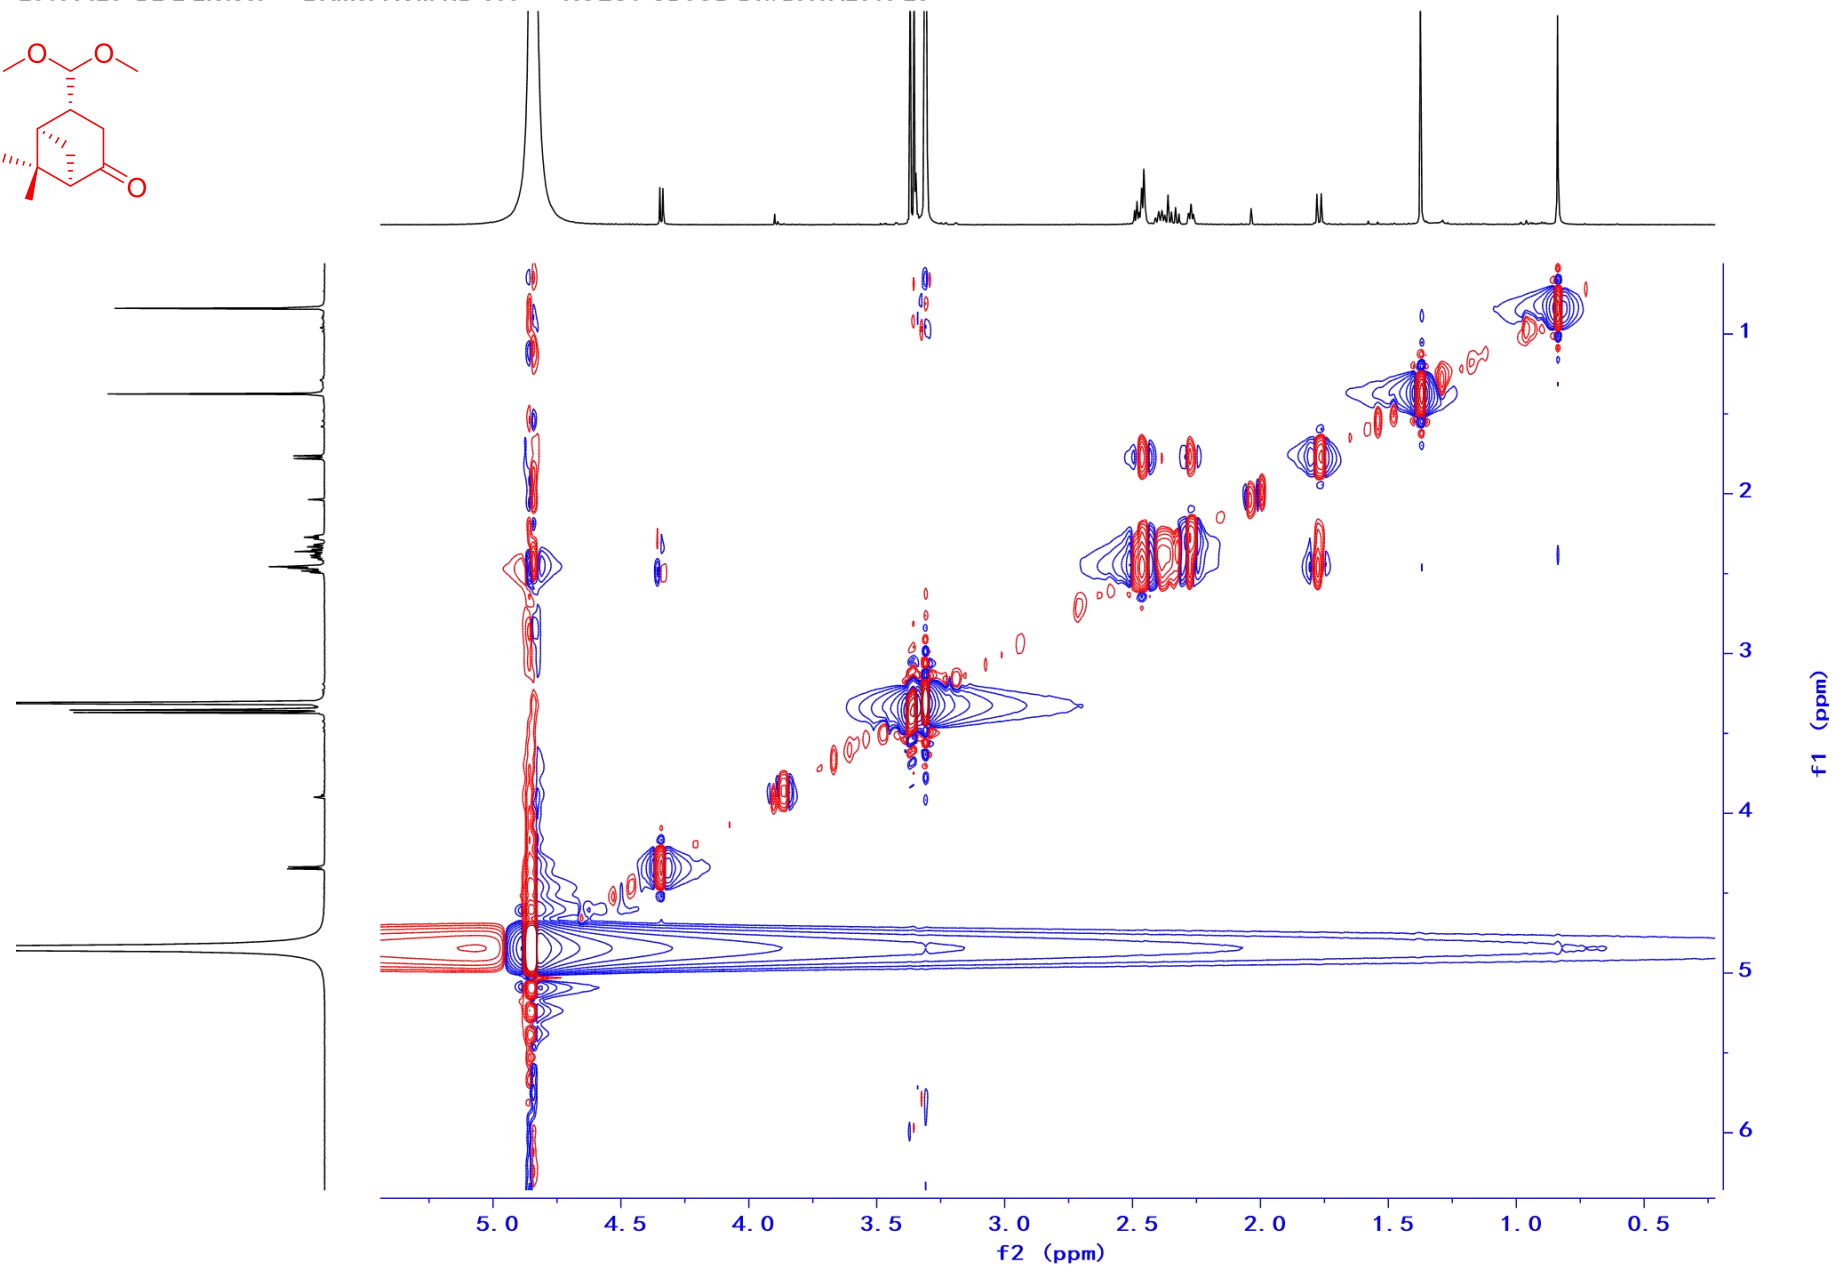

**Figure S90.** The NOESY Spectrum of Compound 10 in MeOH- $d_4$  (600MHz)

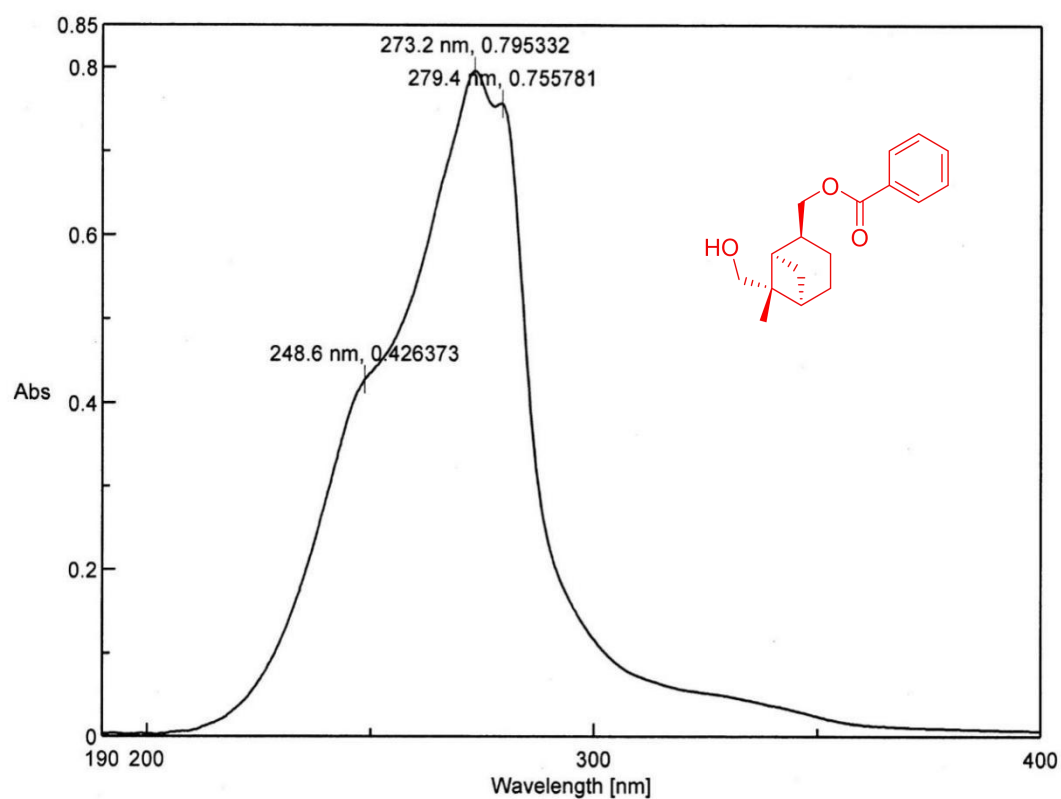

**Figure S91. The UV Spectrum of Compound 11 in MeOH**

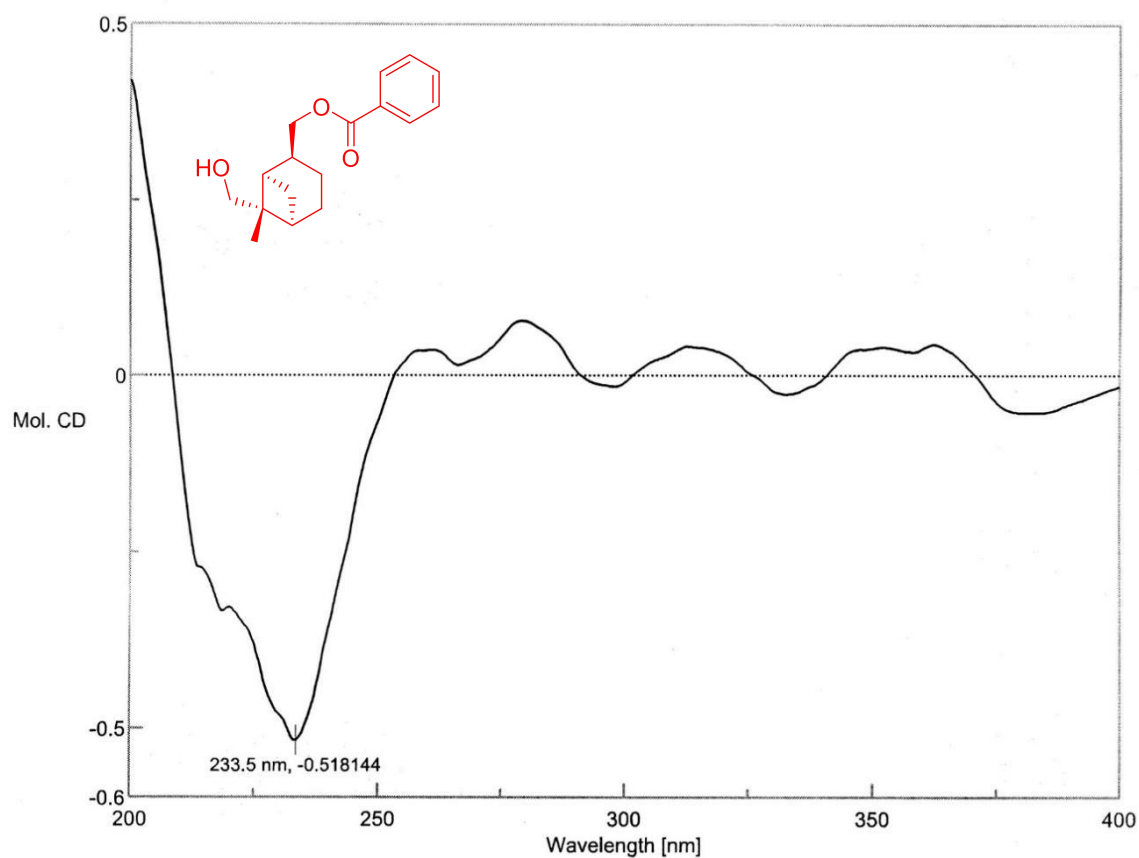

**Figure S92. The CD Spectrum of Compound 11 in MeOH**

MS Formula Results: + Scan (7.853 min) Sub (2016031005.d)

| m/z      | Ion                 | Formula       | Abundance |
|----------|---------------------|---------------|-----------|
| 297.1467 | (M+Na) <sup>+</sup> | C17 H22 Na O3 | 570455.5  |

  

| Best                                | Formula (M)   | Ion Formula      | Score | Cross Sco | Mass     | Calc Mass | Calc m/z | Diff (ppm) | Abs Diff (ppm) | Mass Match | Abund Match | Spacing Match | DBE |
|-------------------------------------|---------------|------------------|-------|-----------|----------|-----------|----------|------------|----------------|------------|-------------|---------------|-----|
| <input checked="" type="checkbox"/> | C17 H22 O3    | C17 H22 Na O3    | 99.67 |           | 274.1575 | 274.1569  | 297.1461 | -2.29      | 2.29           | 99.86      | 99.81       | 99.11         | 7   |
| <input type="checkbox"/>            | C12 H22 N2 O5 | C12 H22 N2 Na O5 | 95.15 |           | 274.1575 | 274.1529  | 297.1421 | -16.98     | 16.98          | 92.66      | 96.21       | 98.86         | 3   |
| <input type="checkbox"/>            | C19 H18 N2    | C19 H18 N2 Na    | 84.24 |           | 274.1575 | 274.147   | 297.1362 | -38.4      | 38.4           | 67.71      | 99.39       | 99.12         | 12  |
| <input type="checkbox"/>            | C16 H22 N2 O2 | C16 H22 N2 Na O2 | 84.11 |           | 274.1575 | 274.1681  | 297.1573 | 38.67      | 38.67          | 67.33      | 99.65       | 99.02         | 7   |
| <input type="checkbox"/>            | C21 H22       | C21 H22 Na       | 74.24 |           | 274.1575 | 274.1722  | 297.1614 | 53.35      | 53.35          | 47.1       | 98.63       | 99.24         | 11  |

**Figure S93. The HR-mass Spectrum of Compound 11 in MeOH**

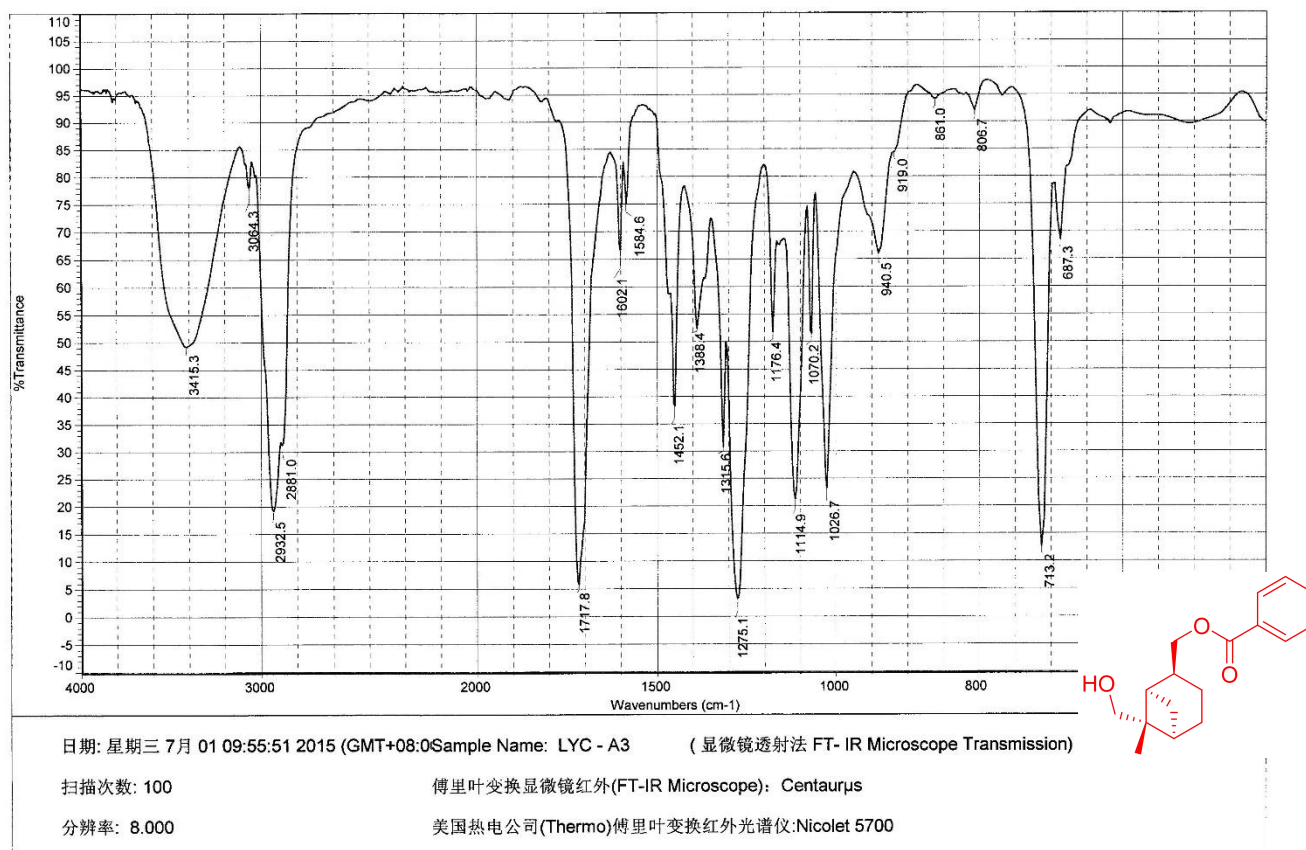

**Figure S94. The IR Spectrum of Compound 11**



PROTON\_01 — DD2-500 LYC-A1 IN cd3od coldprobe-Probe —

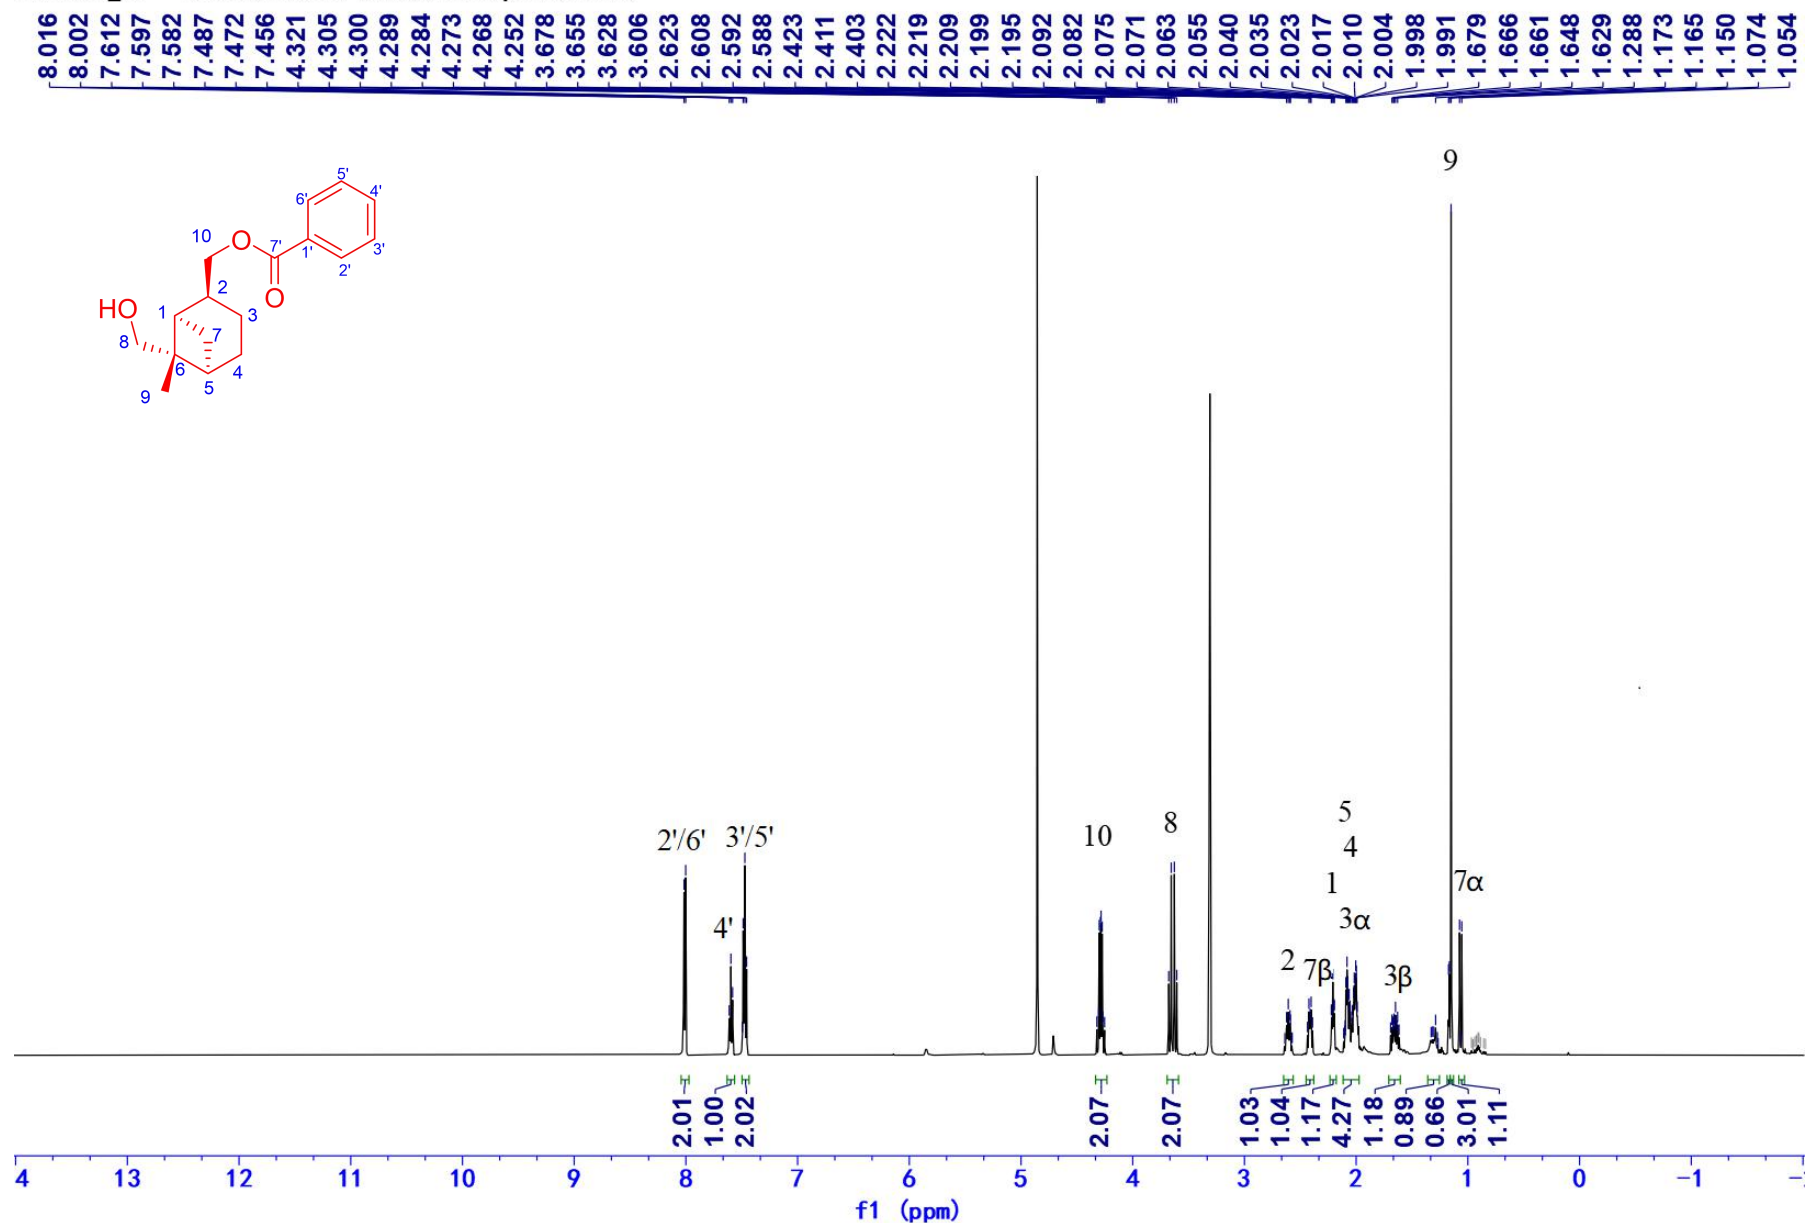

Figure S95. The <sup>1</sup>H NMR Spectrum of Compound 11 in MeOH-*d*<sub>4</sub> (500MHz)

CARBON\_01 — DD2-500 LYC-A3 IN cd3od coldprobe-Probe —

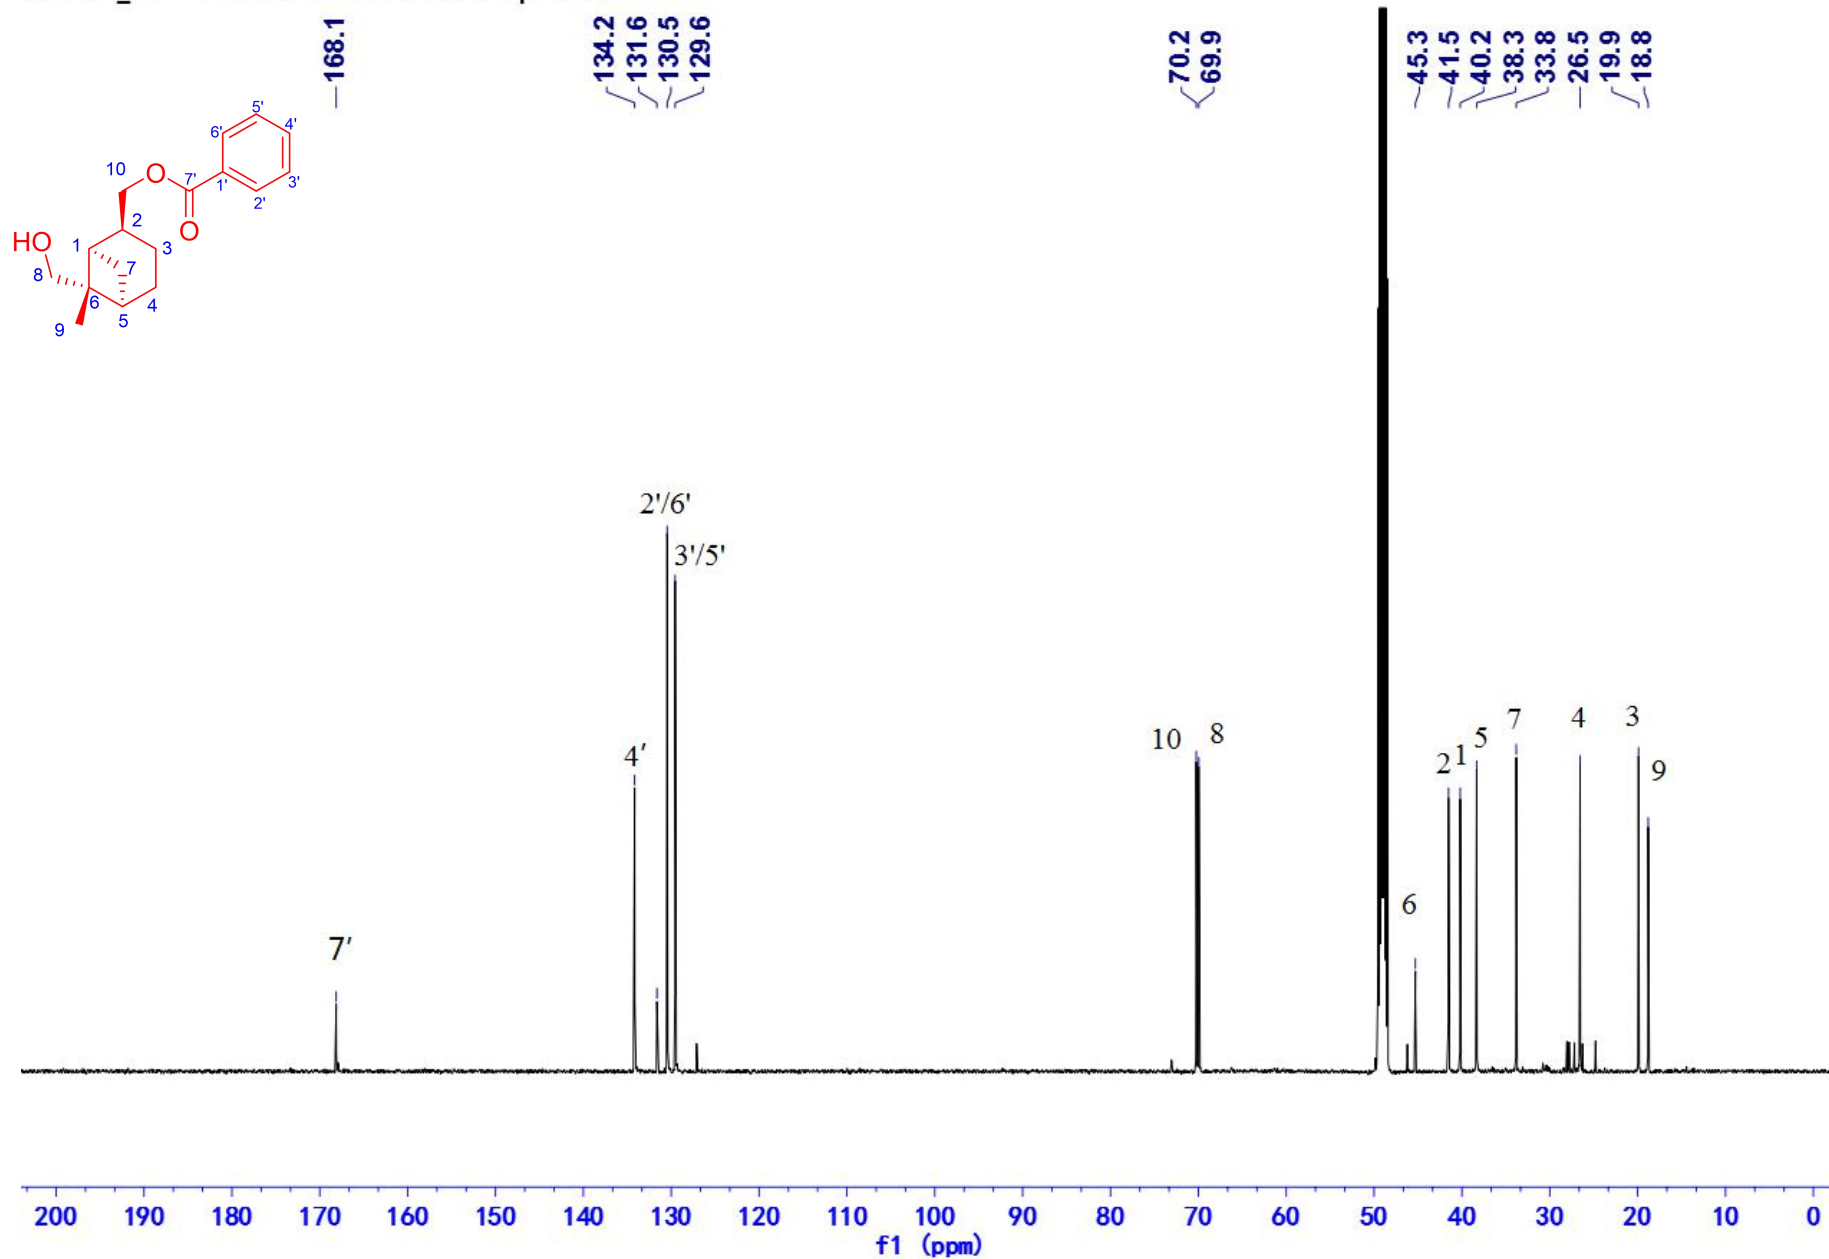

Figure S96. The <sup>13</sup>C NMR Spectrum of Compound 11 in MeOH-*d*<sub>4</sub> (125MHz)

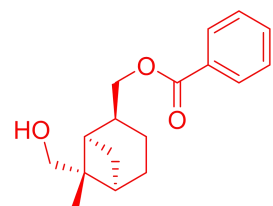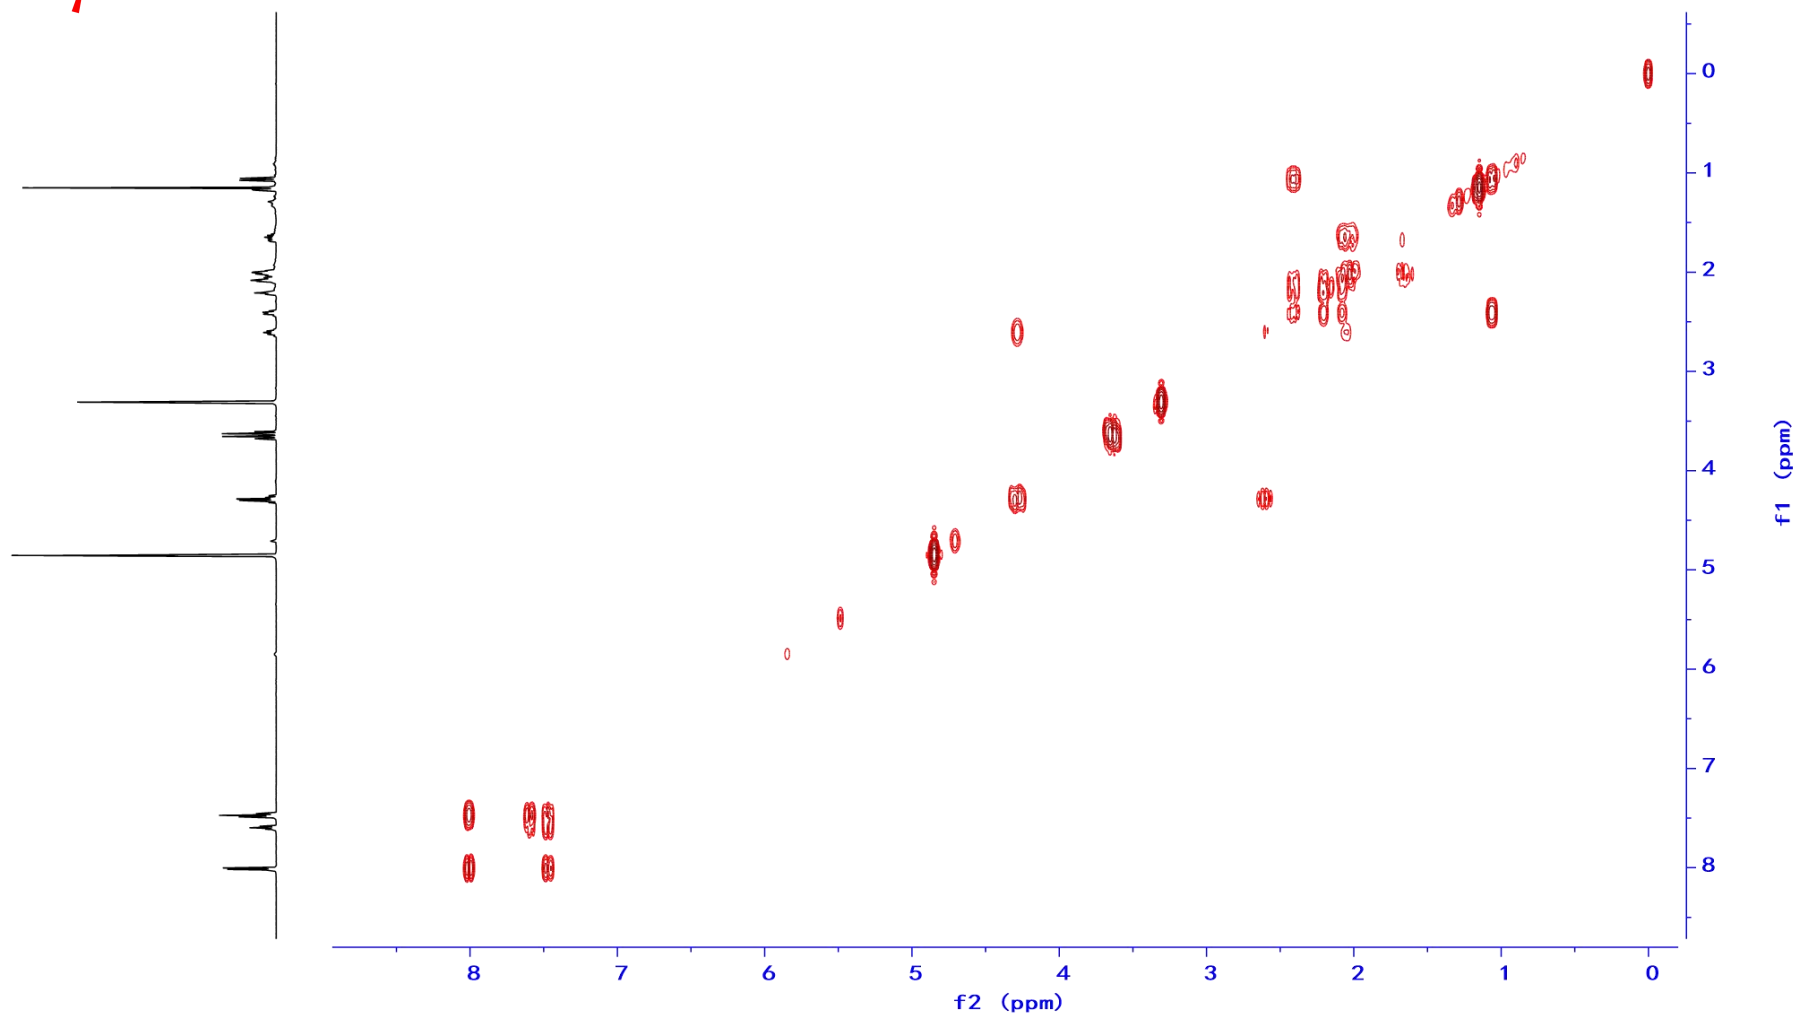

Figure S97. The  $^1\text{H}$ - $^1\text{H}$  COSY Spectrum of Compound 11 in  $\text{MeOH-}d_4$  (500MHz)

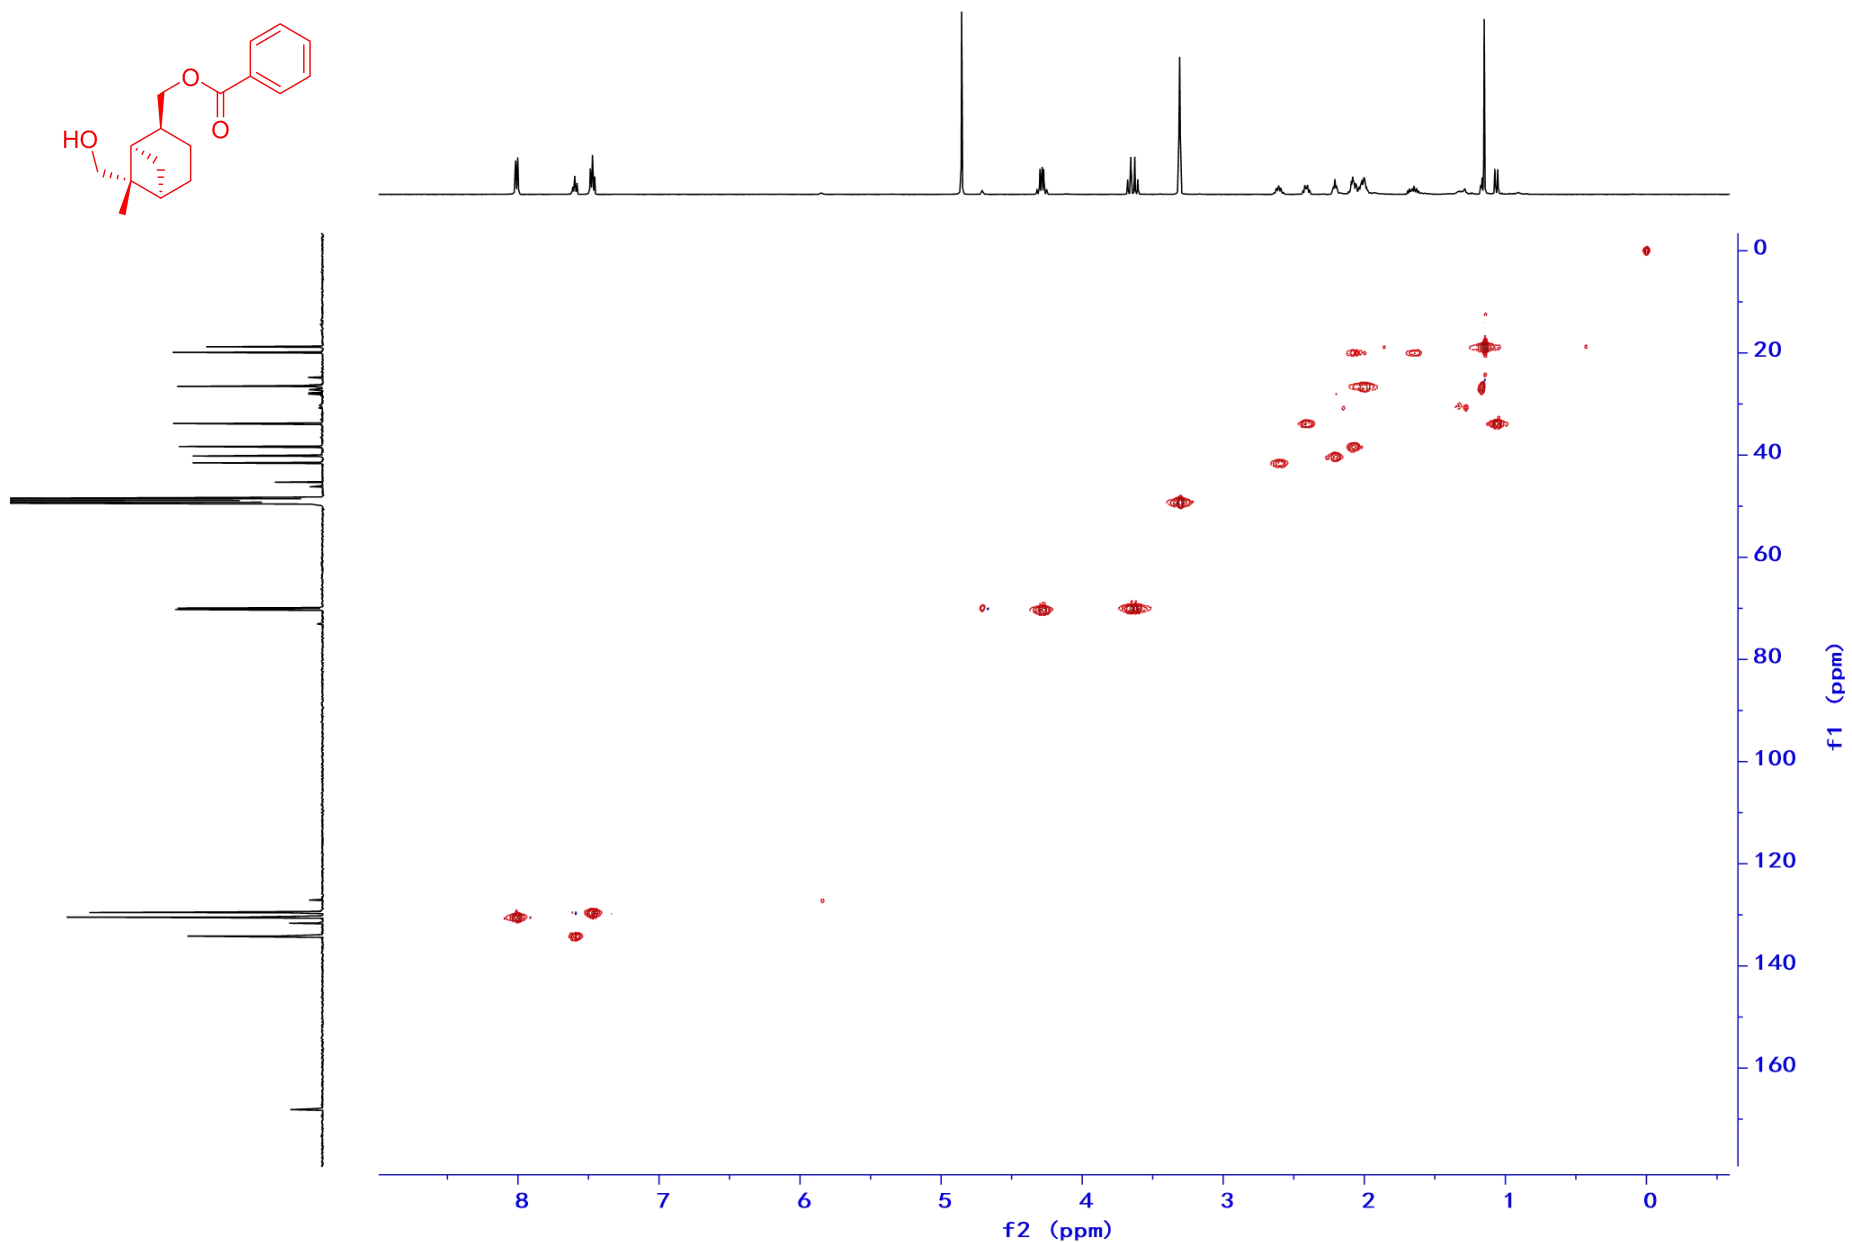

**Figure S98. The HSQC Spectrum of Compound 11 in MeOH- $d_4$  (500MHz)**

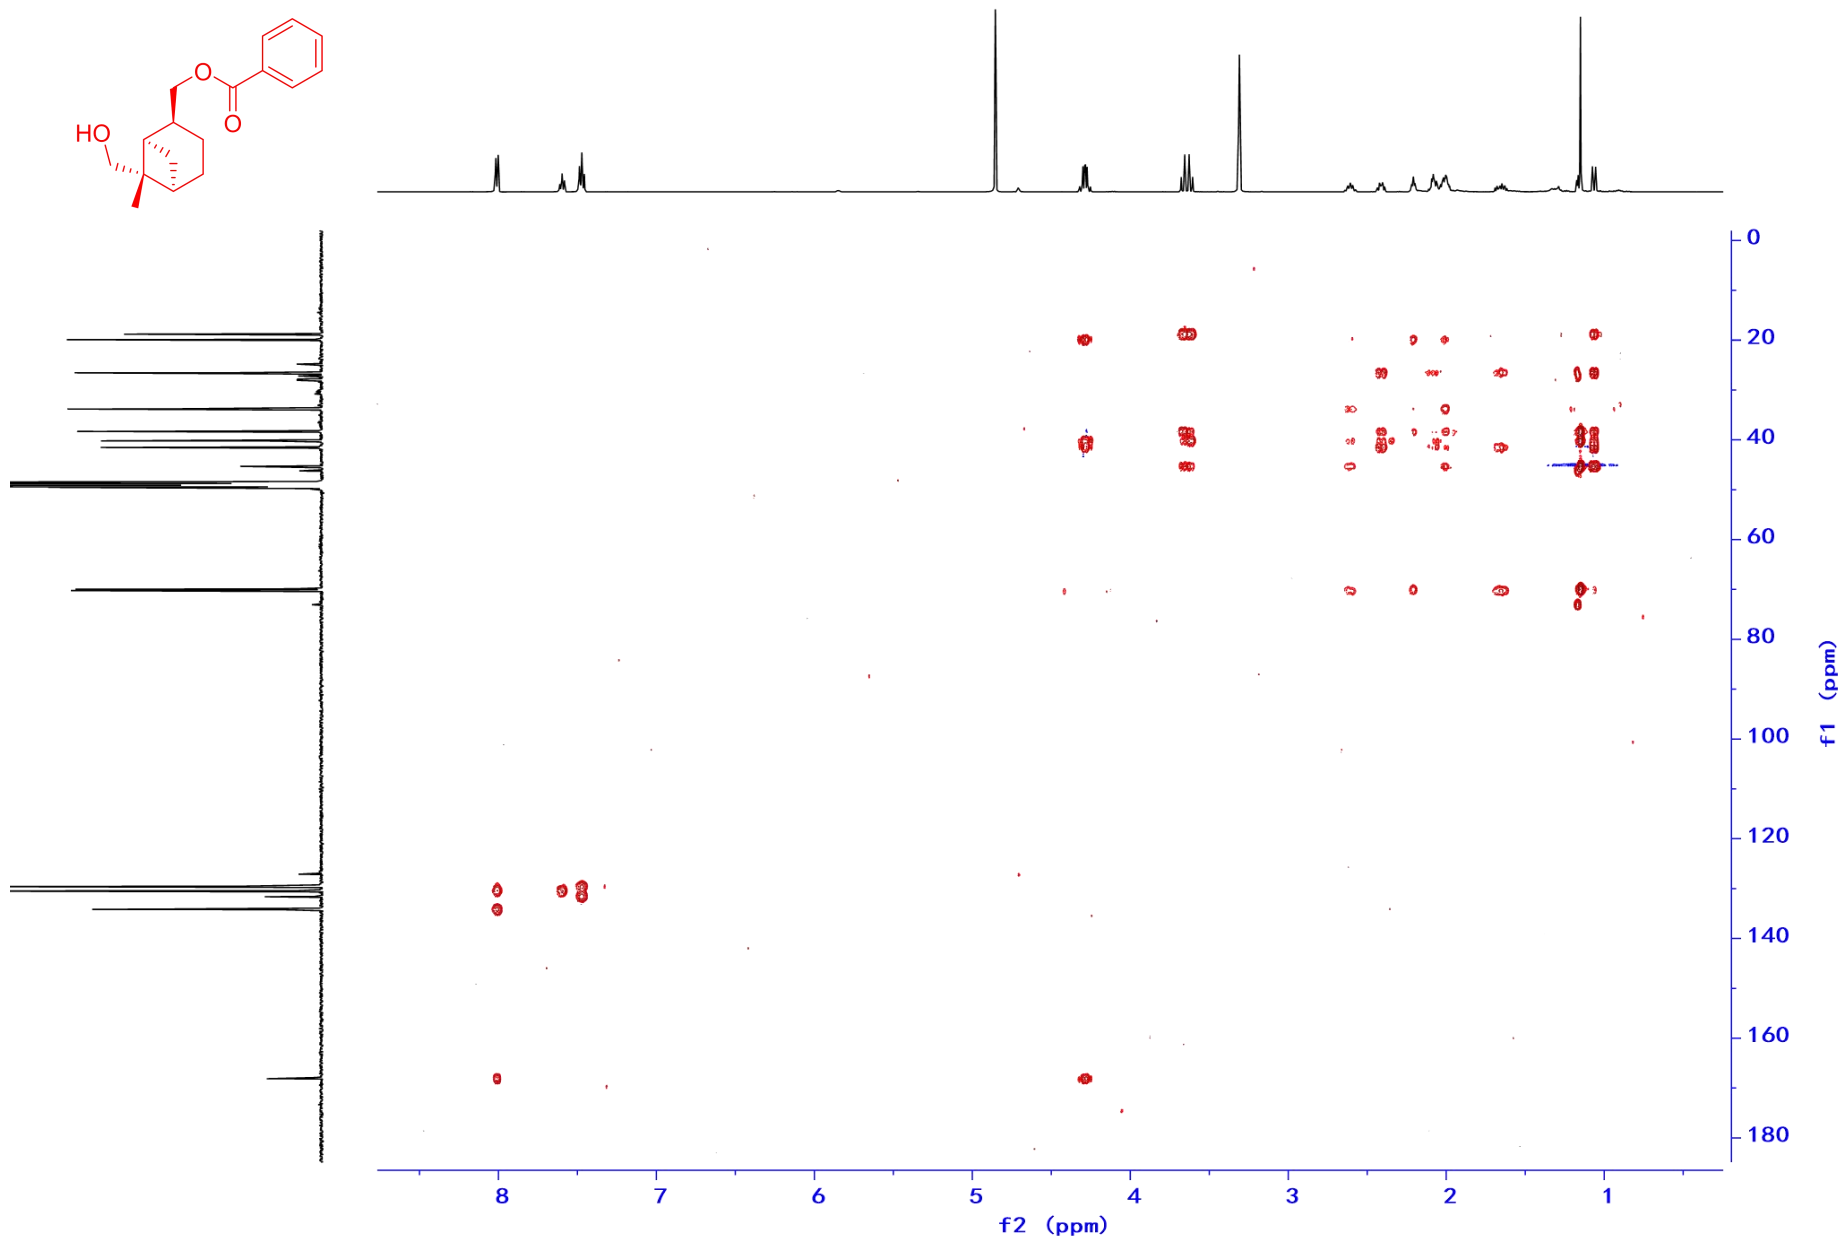

Figure S99. The HMBC Spectrum of Compound 11 in MeOH-*d*<sub>4</sub> (500MHz)

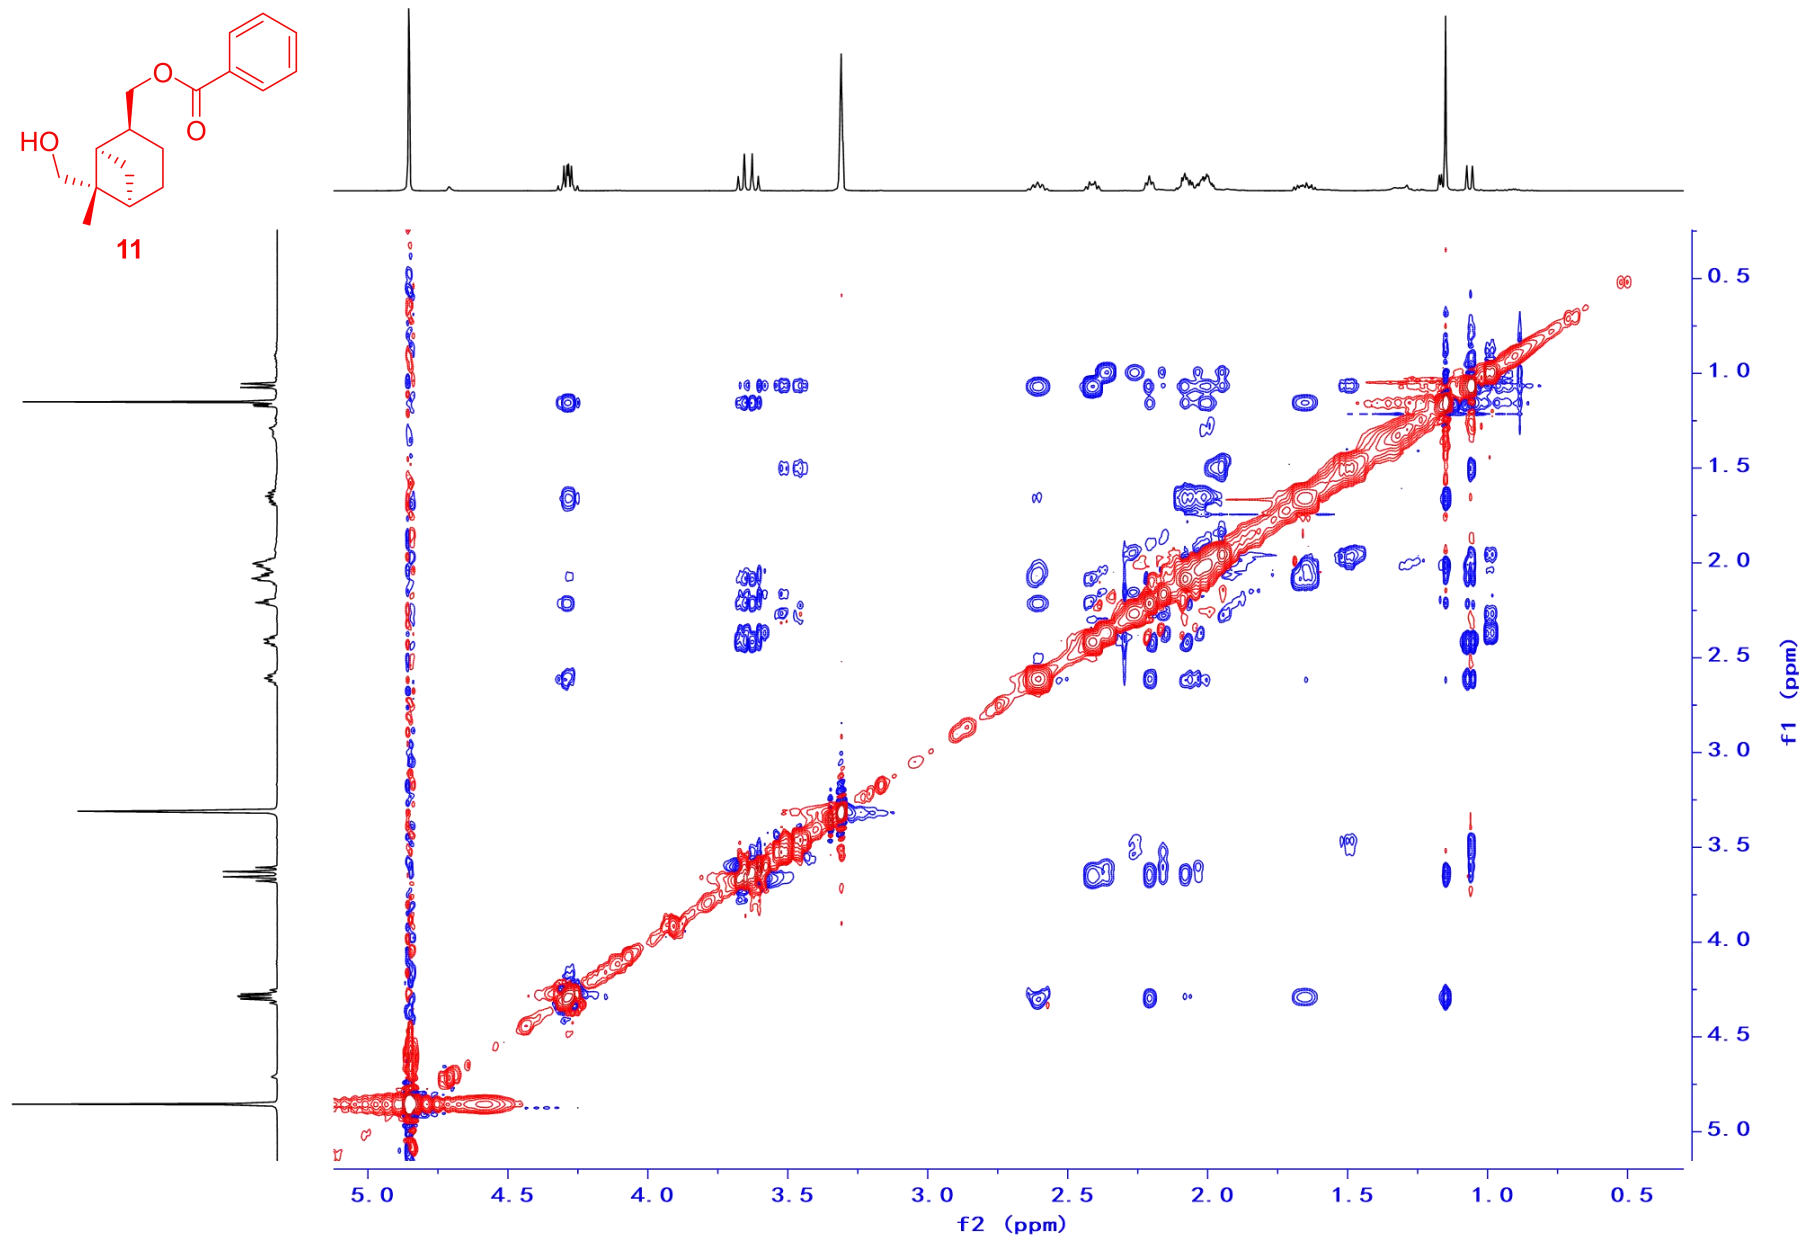

Figure S100. The NOESY Spectrum of Compound 11 in MeOH-*d*<sub>4</sub> (500MHz)

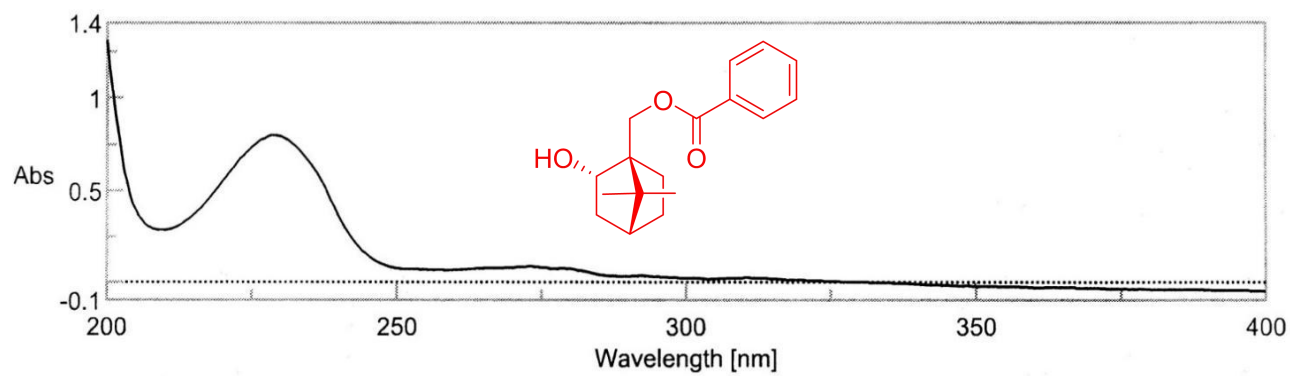

**Figure S101. The UV Spectrum of Compound 12 in MeOH**

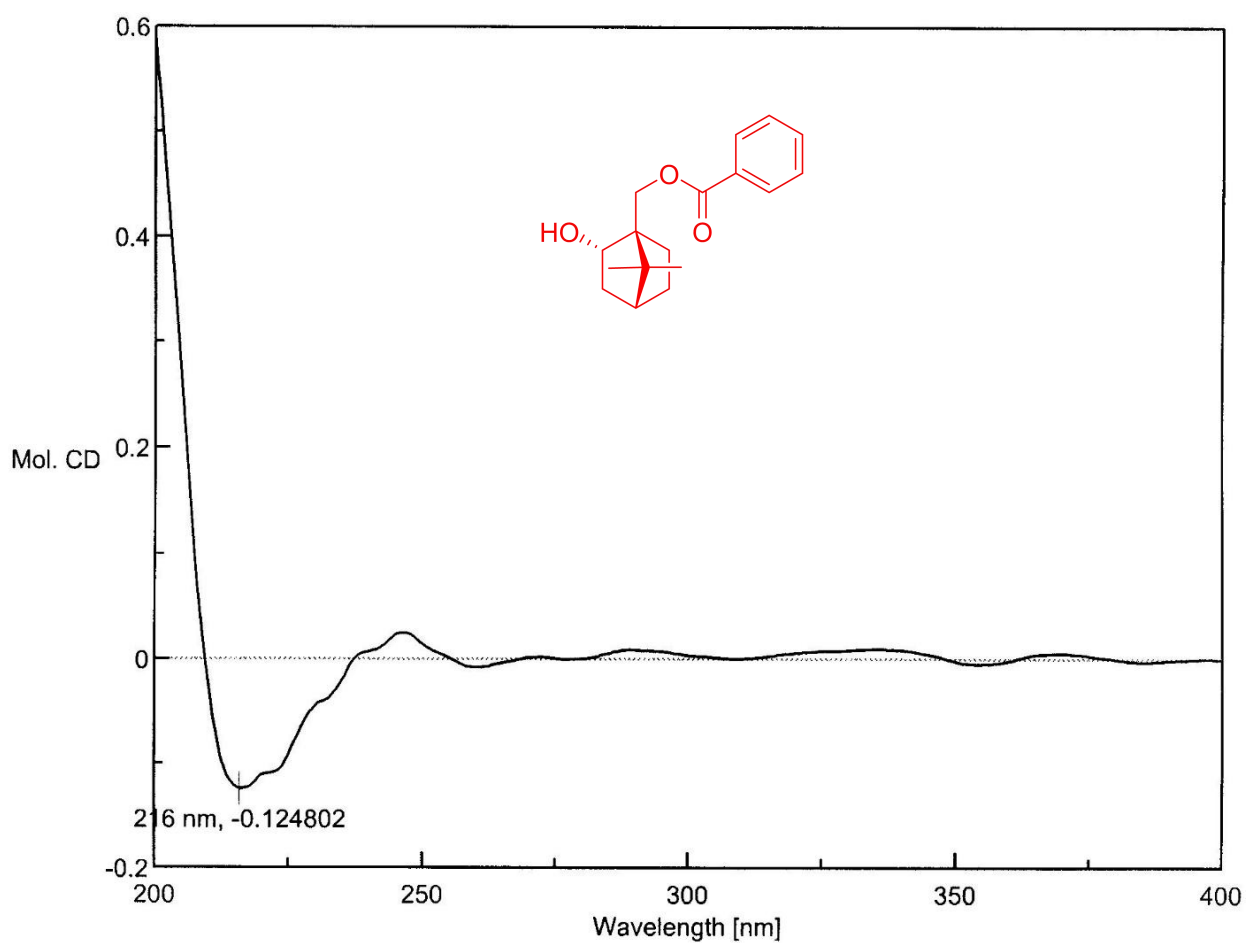

**Figure S102. The CD Spectrum of Compound 12 in MeOH**

MS Formula Results: + Scan (7.805-8.192 min) Sub (2016031001.d)

| m/z     | Ion                 | Formula       | Abundance |
|---------|---------------------|---------------|-----------|
| 297.147 | (M+Na) <sup>+</sup> | C17 H22 Na O3 | 116016.4  |

  

| Best                                | Formula (M)   | Ion Formula      | Score | Cross Sco | Mass     | Calc Mass | Calc m/z | Diff (ppm) | Abs Diff (ppm) | Mass Match | Abund Match | Spacing Match | DBE |
|-------------------------------------|---------------|------------------|-------|-----------|----------|-----------|----------|------------|----------------|------------|-------------|---------------|-----|
| <input checked="" type="checkbox"/> | C17 H22 O3    | C17 H22 Na O3    | 99.66 |           | 274.1578 | 274.1569  | 297.1461 | -3.33      | 3.33           | 99.71      | 99.32       | 99.99         | 7   |
| <input type="checkbox"/>            | C12 H22 N2 O5 | C12 H22 N2 Na O5 | 95.84 |           | 274.1578 | 274.1529  | 297.1421 | -18.01     | 18.01          | 91.78      | 99.18       | 99.95         | 3   |
| <input type="checkbox"/>            | C16 H22 N2 O2 | C16 H22 N2 Na O2 | 84.98 |           | 274.1578 | 274.1681  | 297.1573 | 37.64      | 37.64          | 68.75      | 99.54       | 99.97         | 7   |
| <input type="checkbox"/>            | C19 H18 N2    | C19 H18 N2 Na    | 83.1  |           | 274.1578 | 274.147   | 297.1362 | -39.43     | 39.43          | 66.28      | 97.06       | 99.98         | 12  |
| <input type="checkbox"/>            | C21 H22       | C21 H22 Na       | 74.12 |           | 274.1578 | 274.1722  | 297.1614 | 52.31      | 52.31          | 48.49      | 95.27       | 99.99         | 11  |

Figure S103. The HR-mass Spectrum of Compound 12 in MeOH

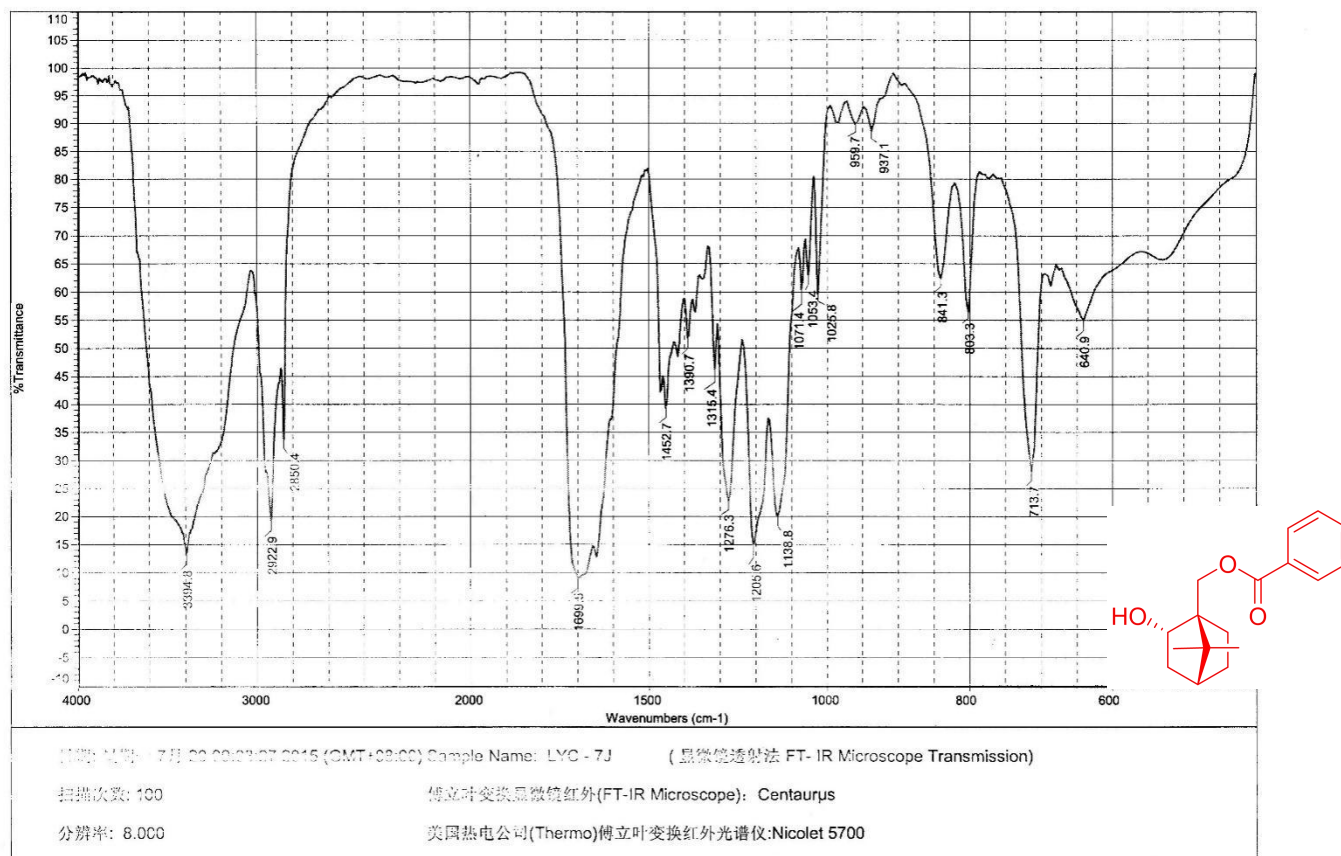

Figure S104. The IR Spectrum of Compound 12



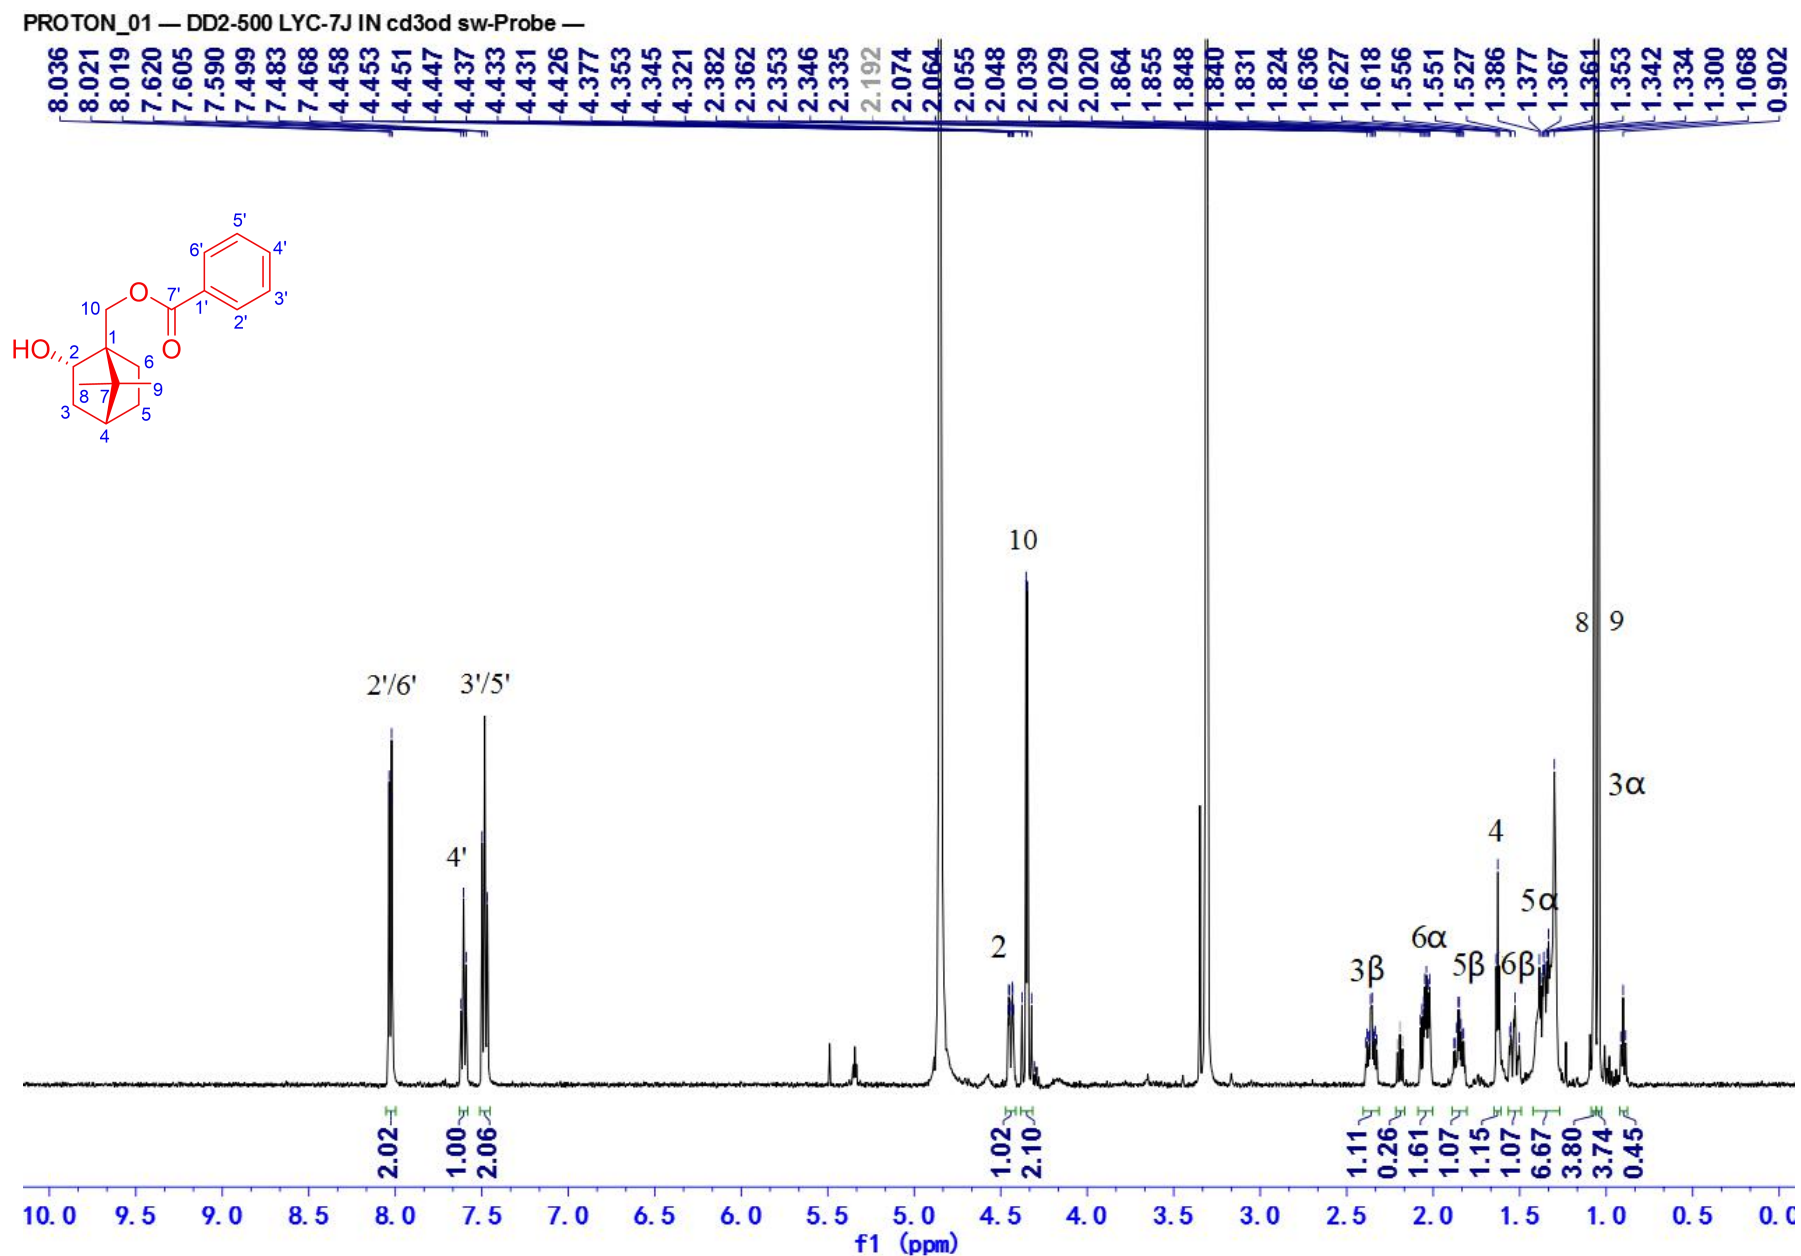

Figure S105. The <sup>1</sup>H NMR Spectrum of Compound 12 in MeOH-*d*<sub>4</sub> (500MHz)

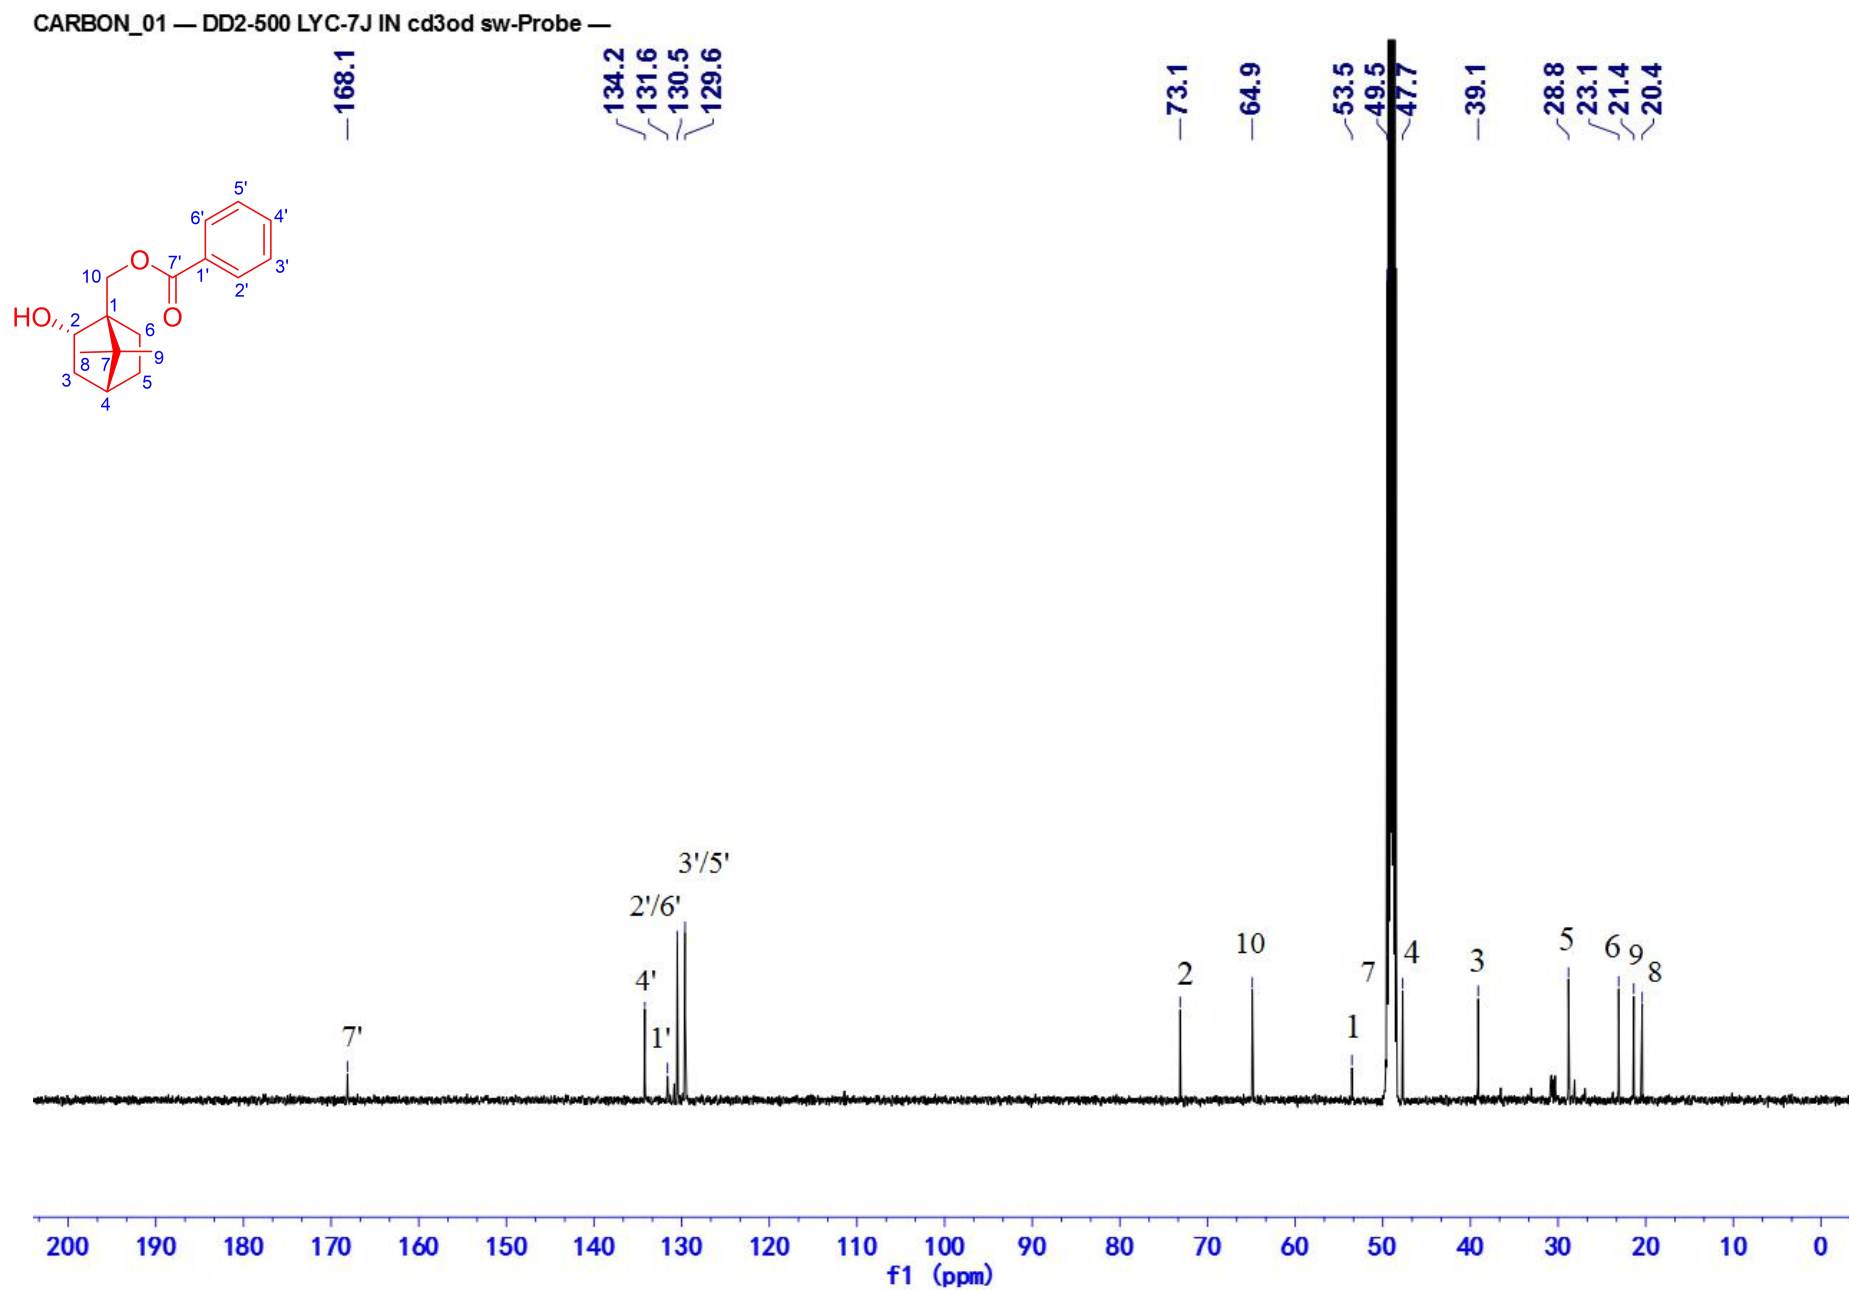

Figure S106. The  $^{13}\text{C}$  NMR Spectrum of Compound 12 in  $\text{MeOH-}d_4$  (125MHz)

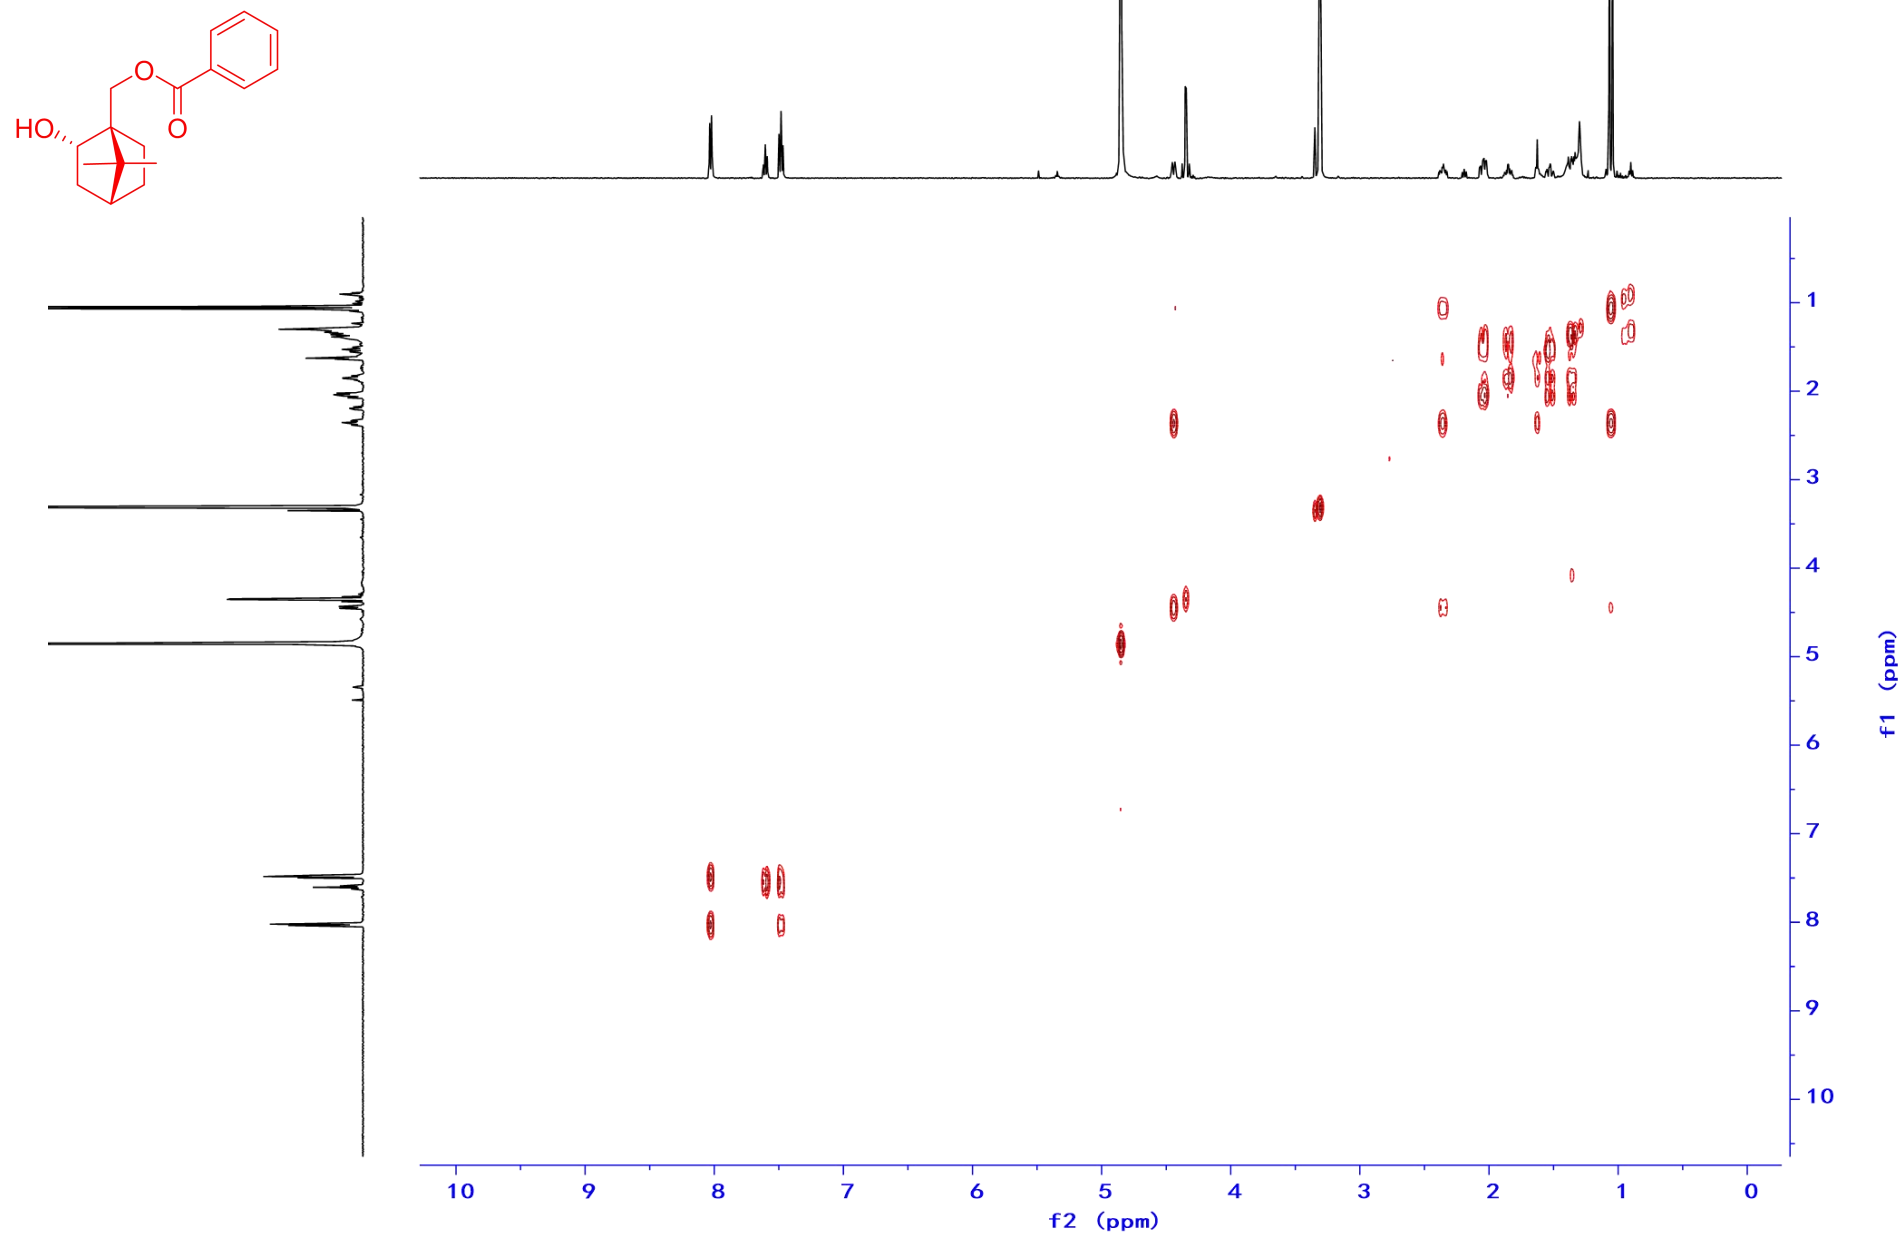

Figure S107. The  $^1\text{H}$ - $^1\text{H}$  COSY Spectrum of Compound 12 in  $\text{MeOH-}d_4$  (500MHz)

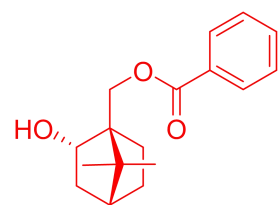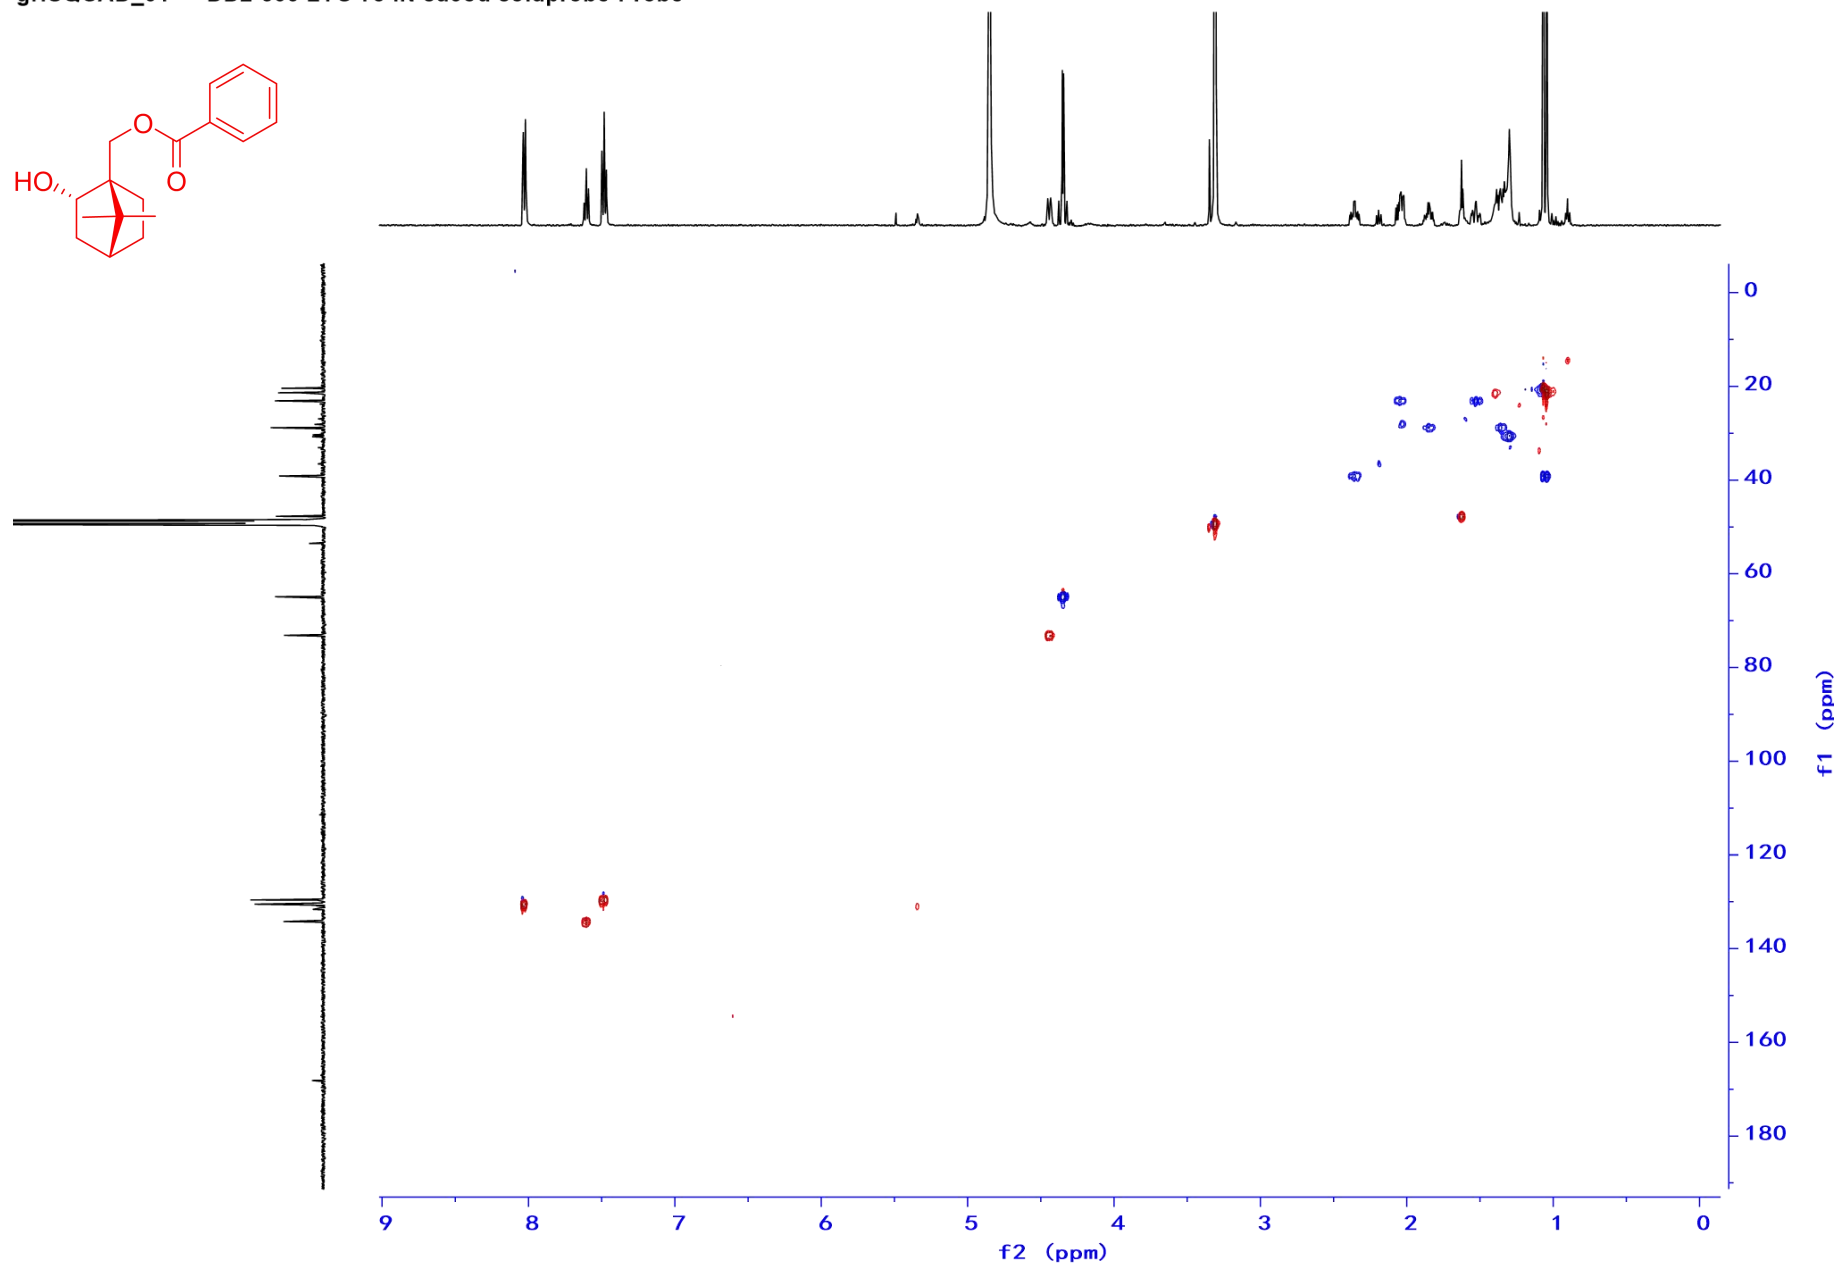

**Figure S108. The HSQC Spectrum of Compound 12 in MeOH- $d_4$  (500MHz)**

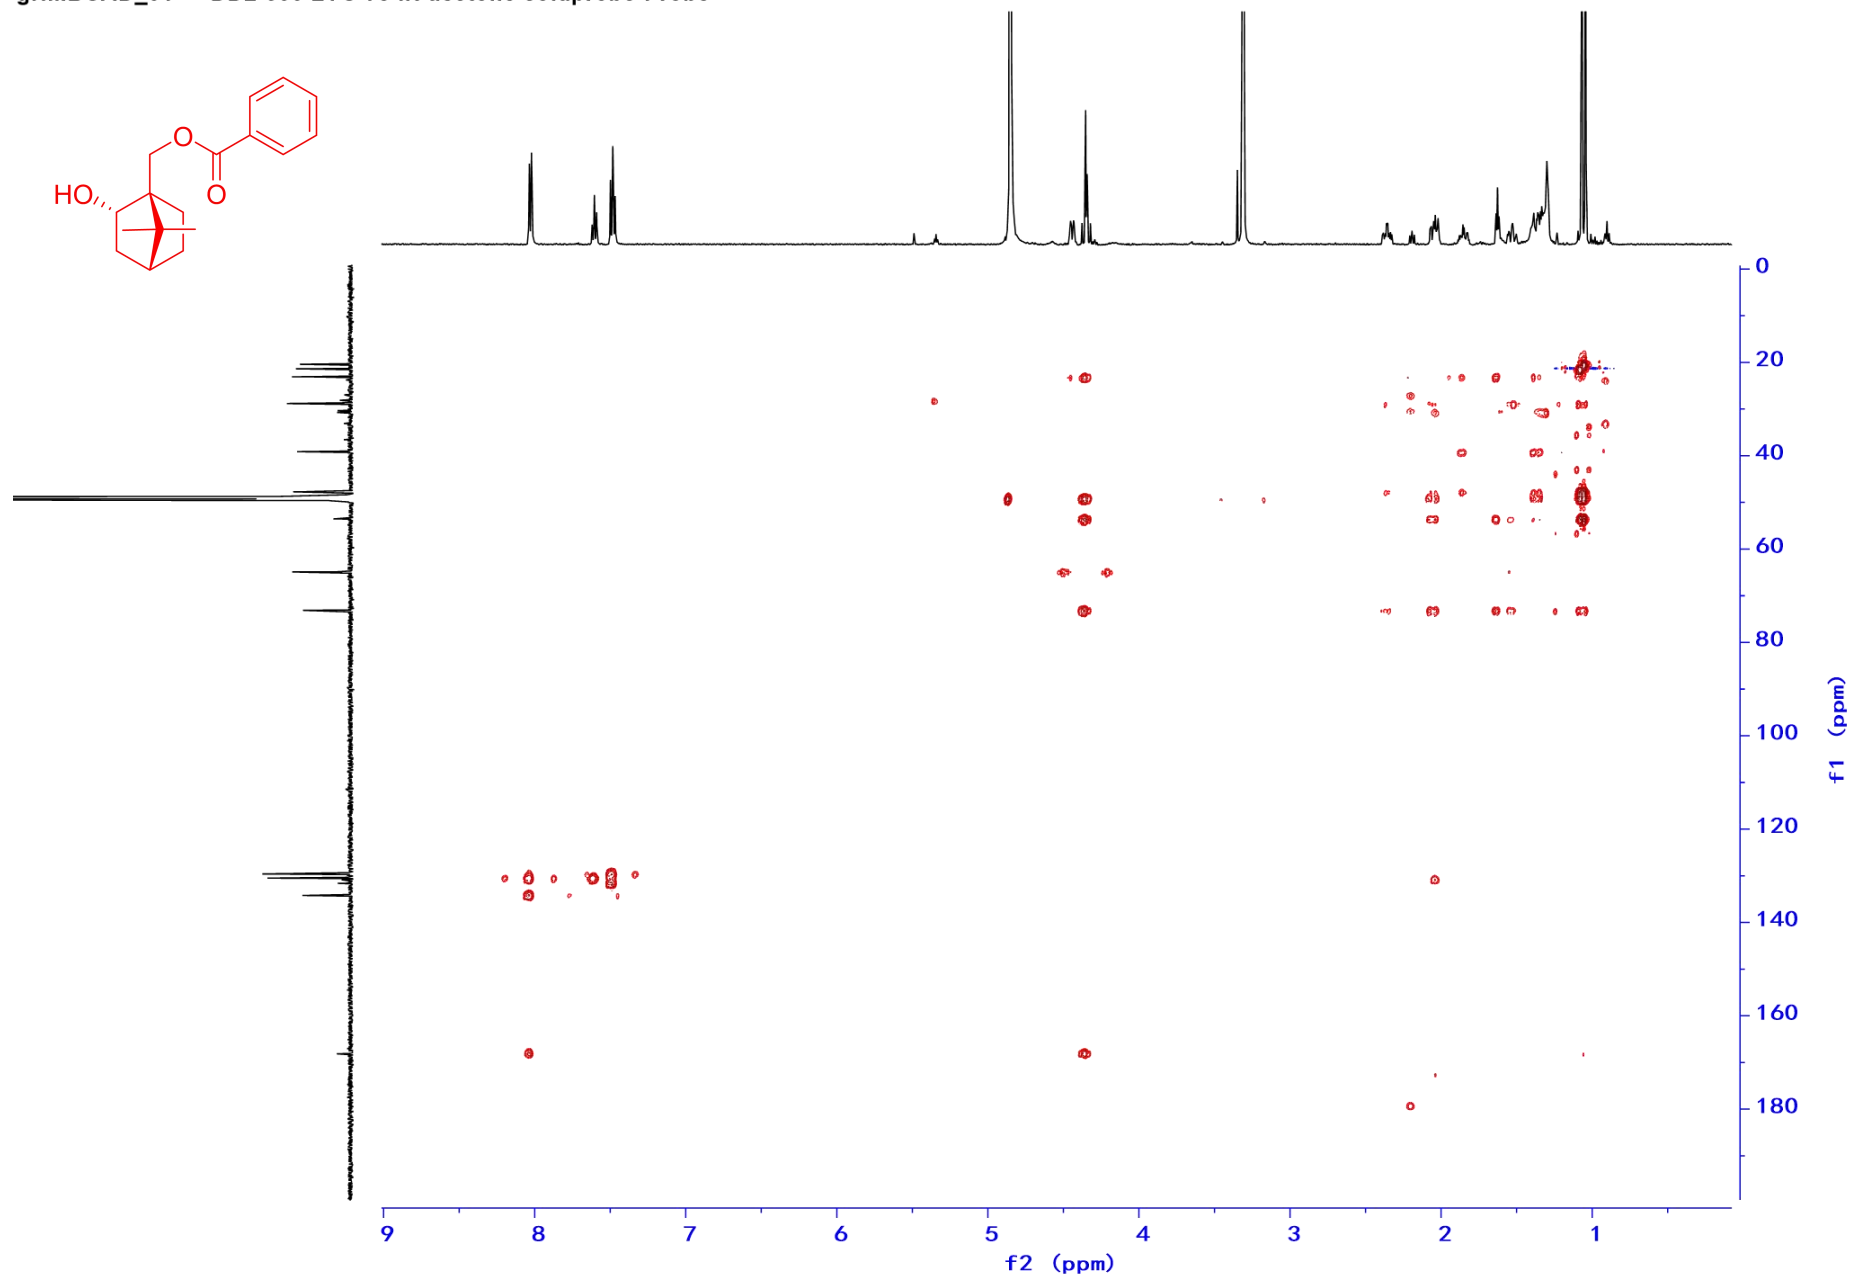

**Figure S109.** The HMBC Spectrum of Compound 12 in  $\text{MeOH-}d_4$  (500MHz)

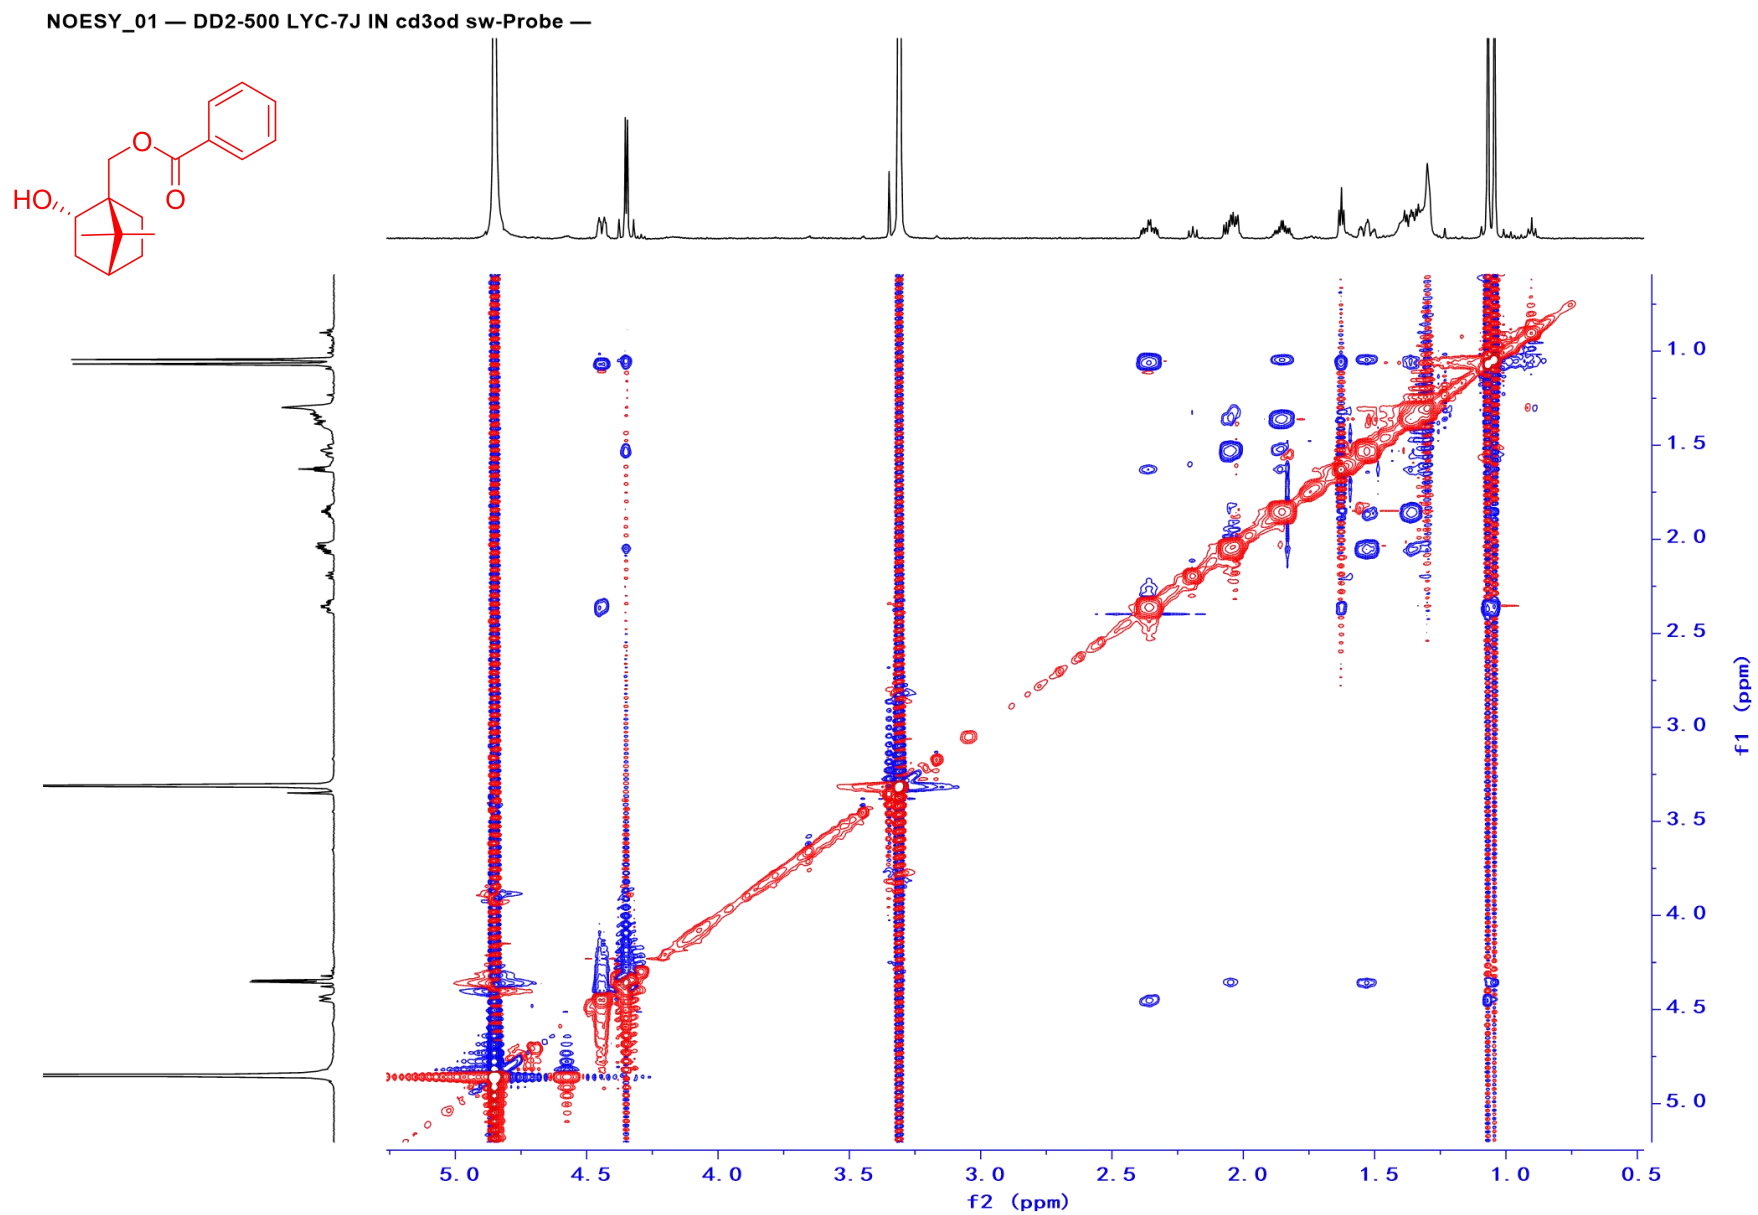

Figure S110. The NOESY Spectrum of Compound 12 in MeOH- $d_4$  (500MHz)

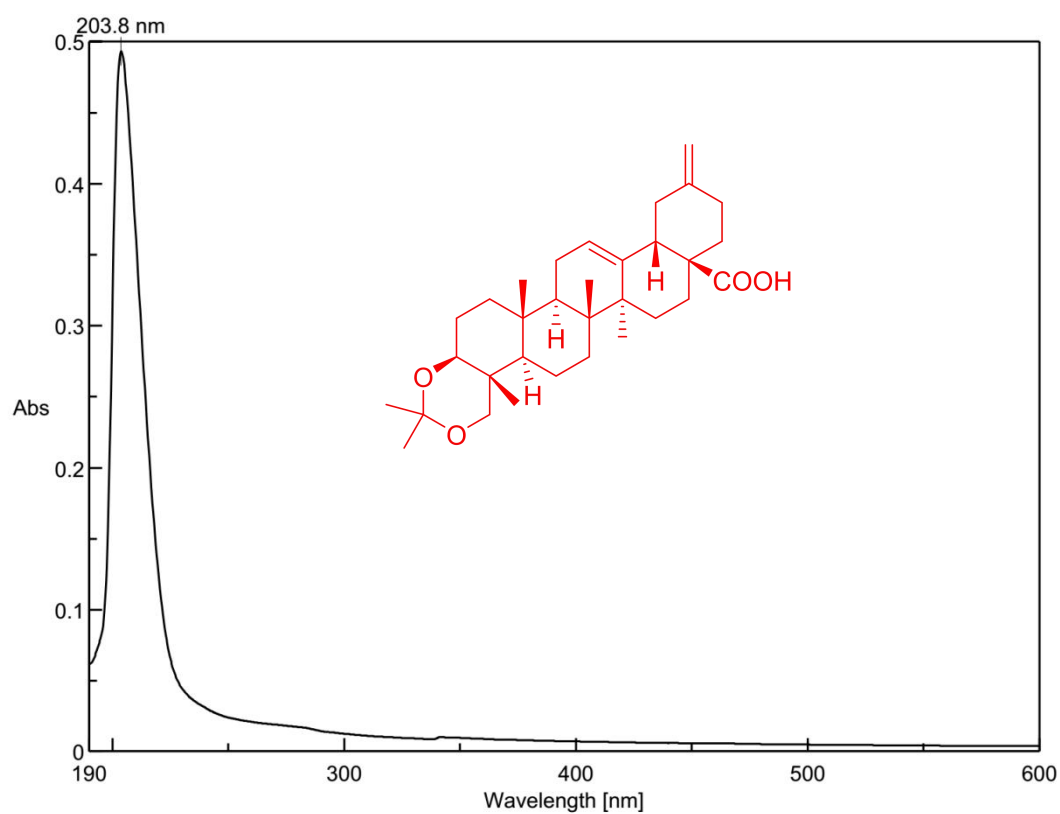

**Figure S111. The UV Spectrum of Compound 26 in MeOH**

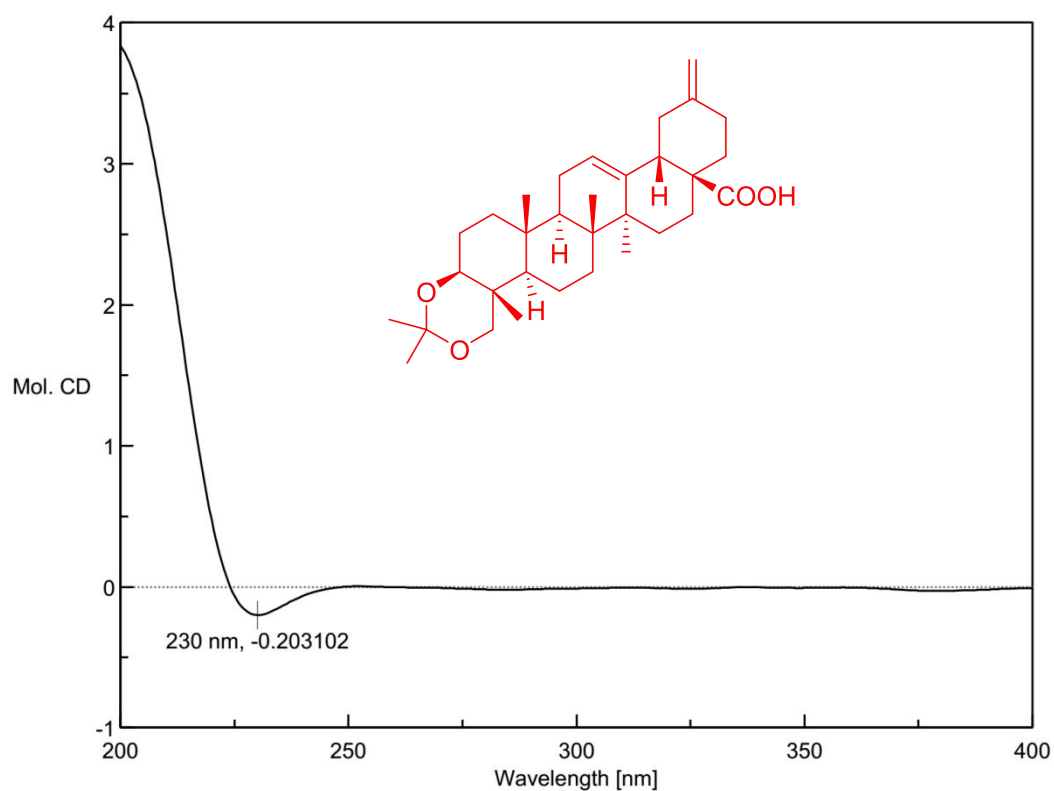

**Figure S112. The CD Spectrum of Compound 26 in MeOH**

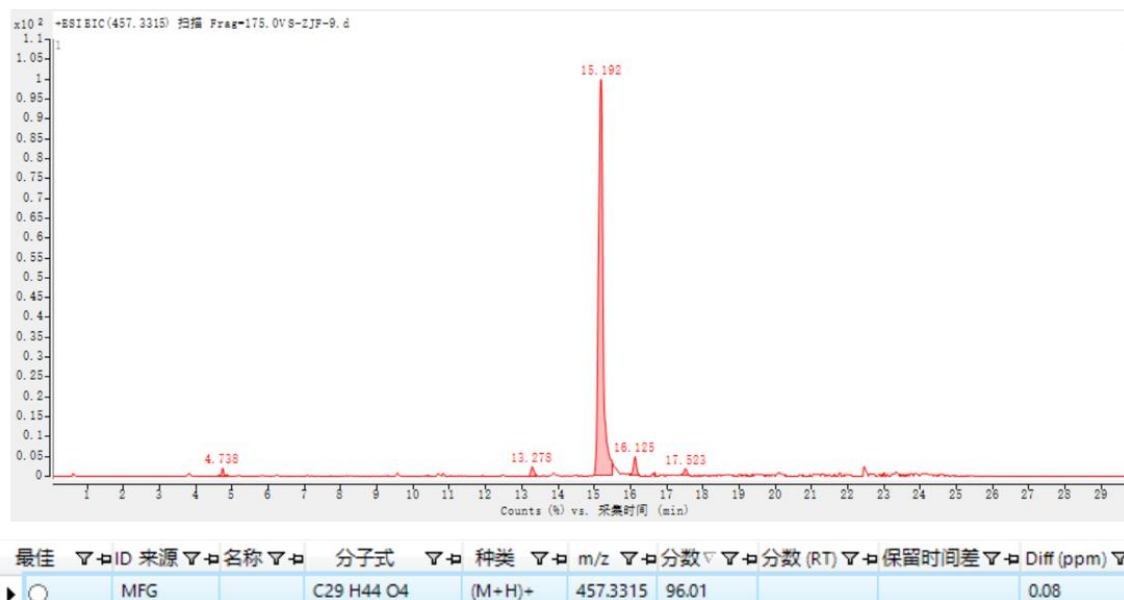

**Figure S113. The HR-mass Spectrum of Compound 26 in MeOH**

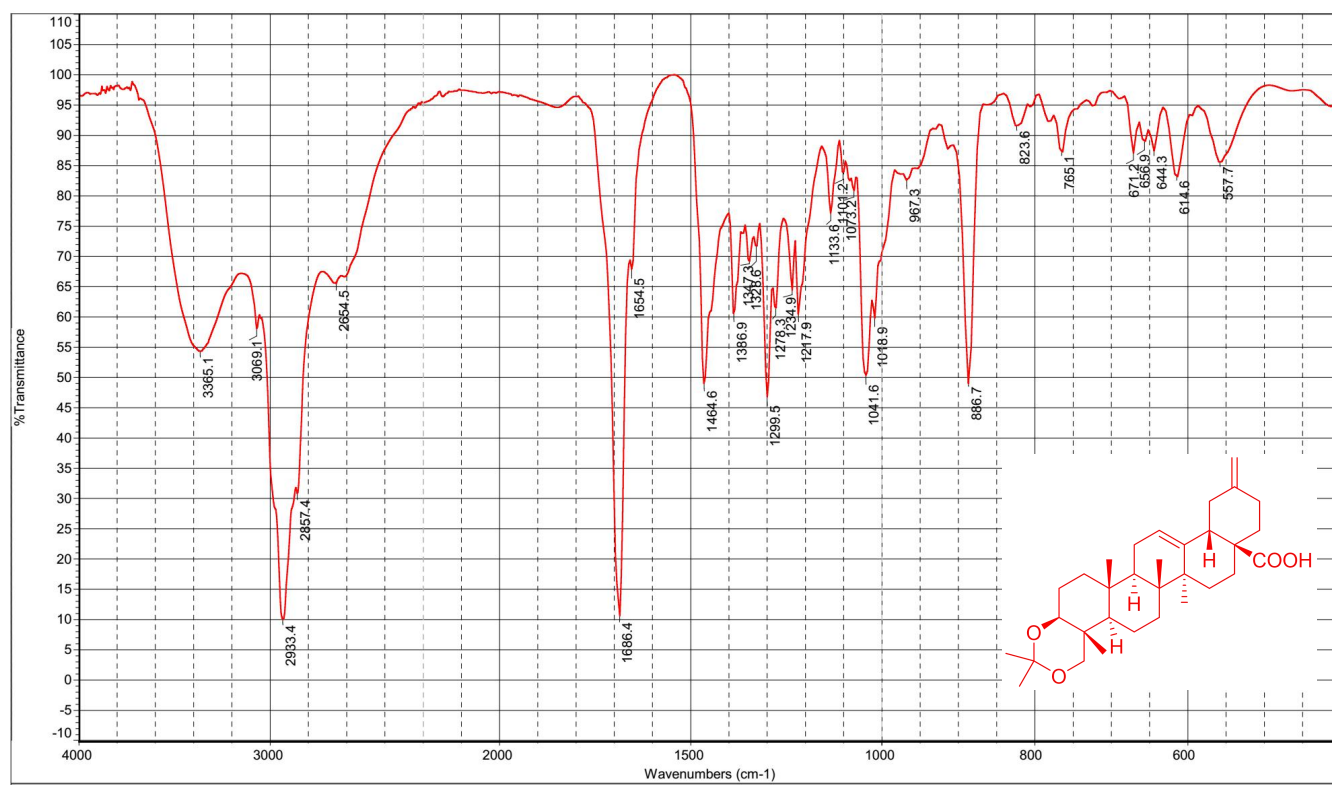

**Figure S114. The IR Spectrum of Compound 26**



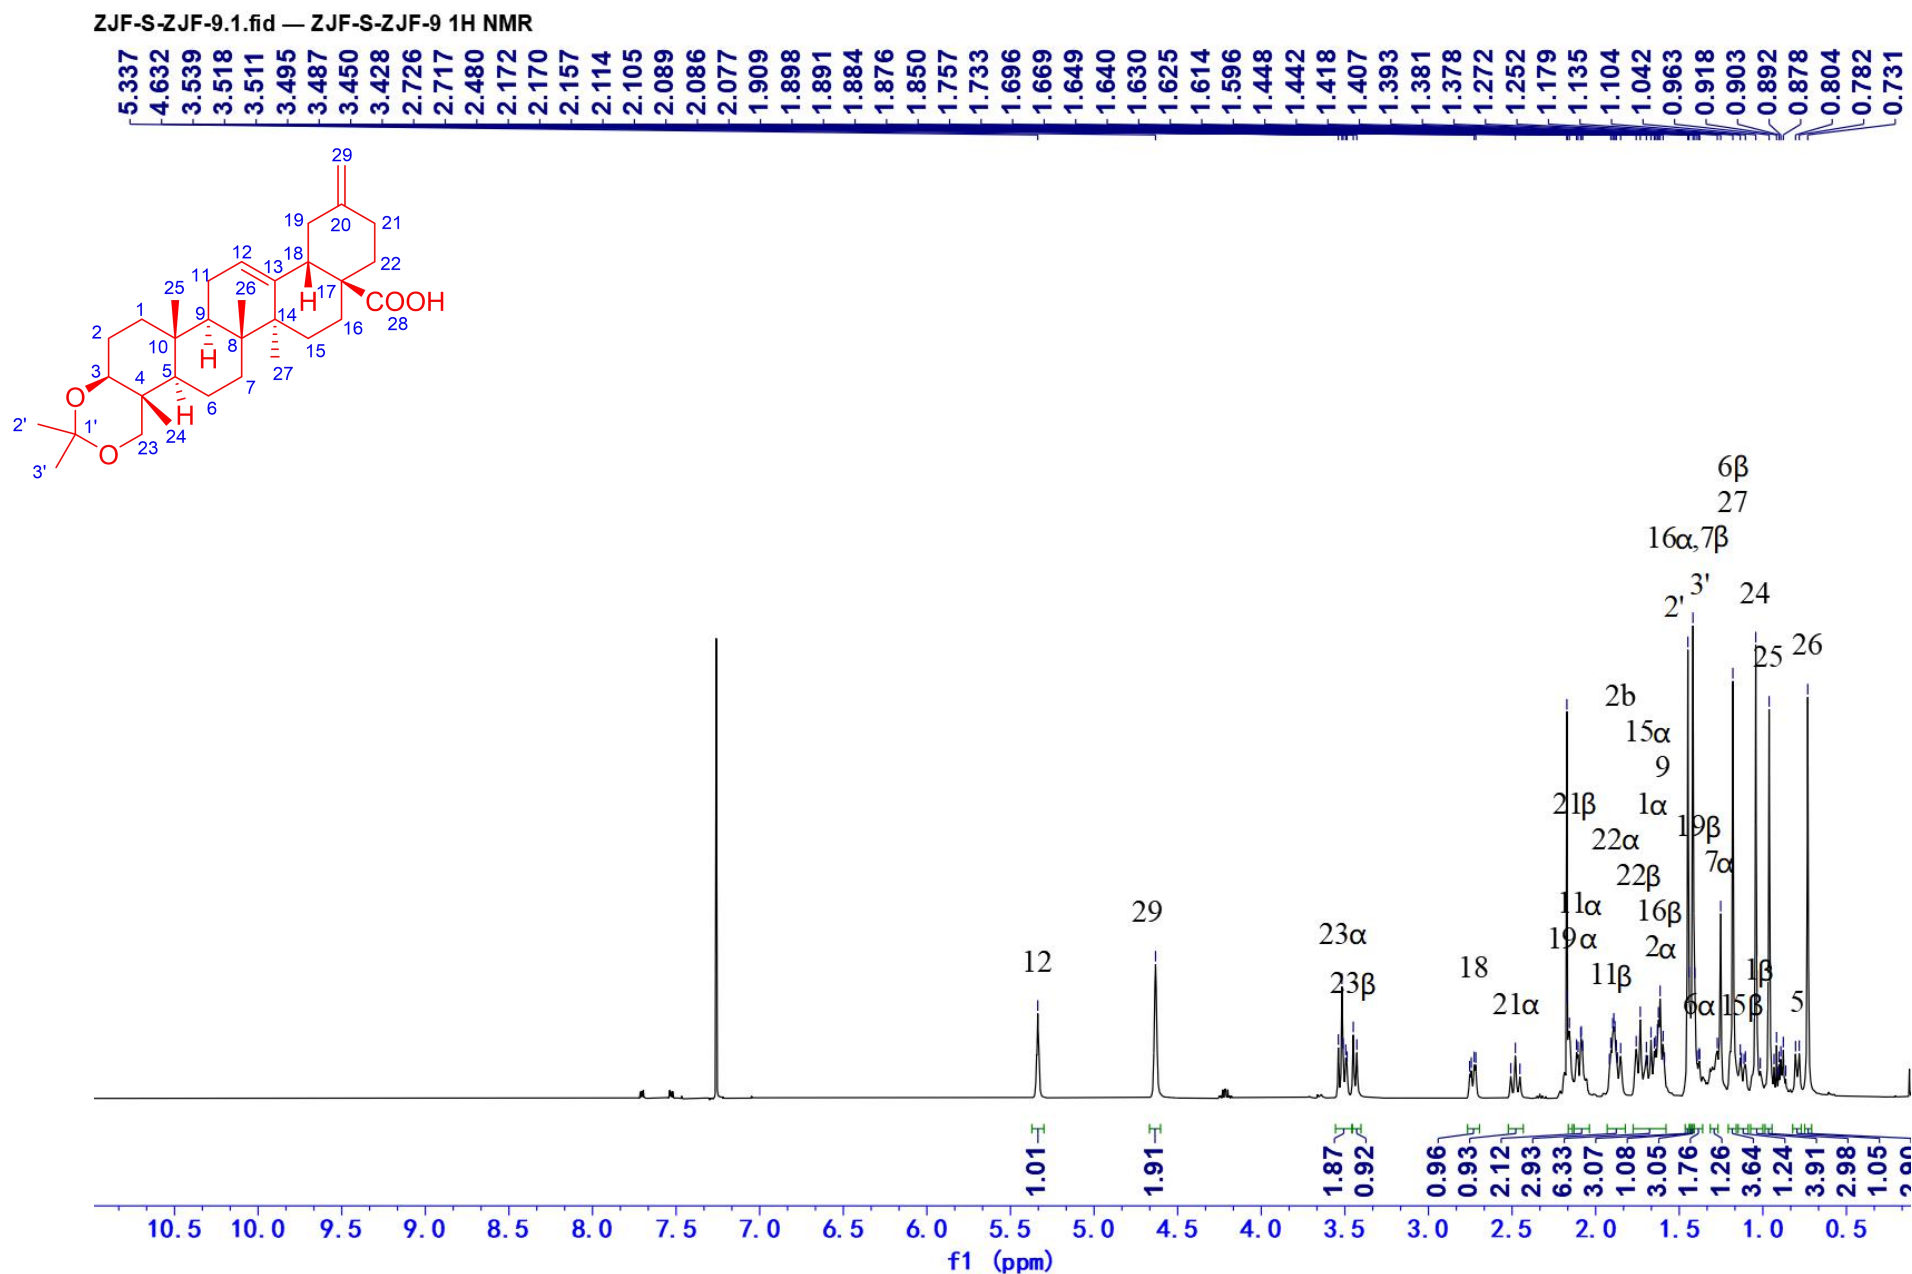

Figure S115. The <sup>1</sup>H NMR Spectrum of Compound 26 in CD<sub>3</sub>Cl (500MHz)

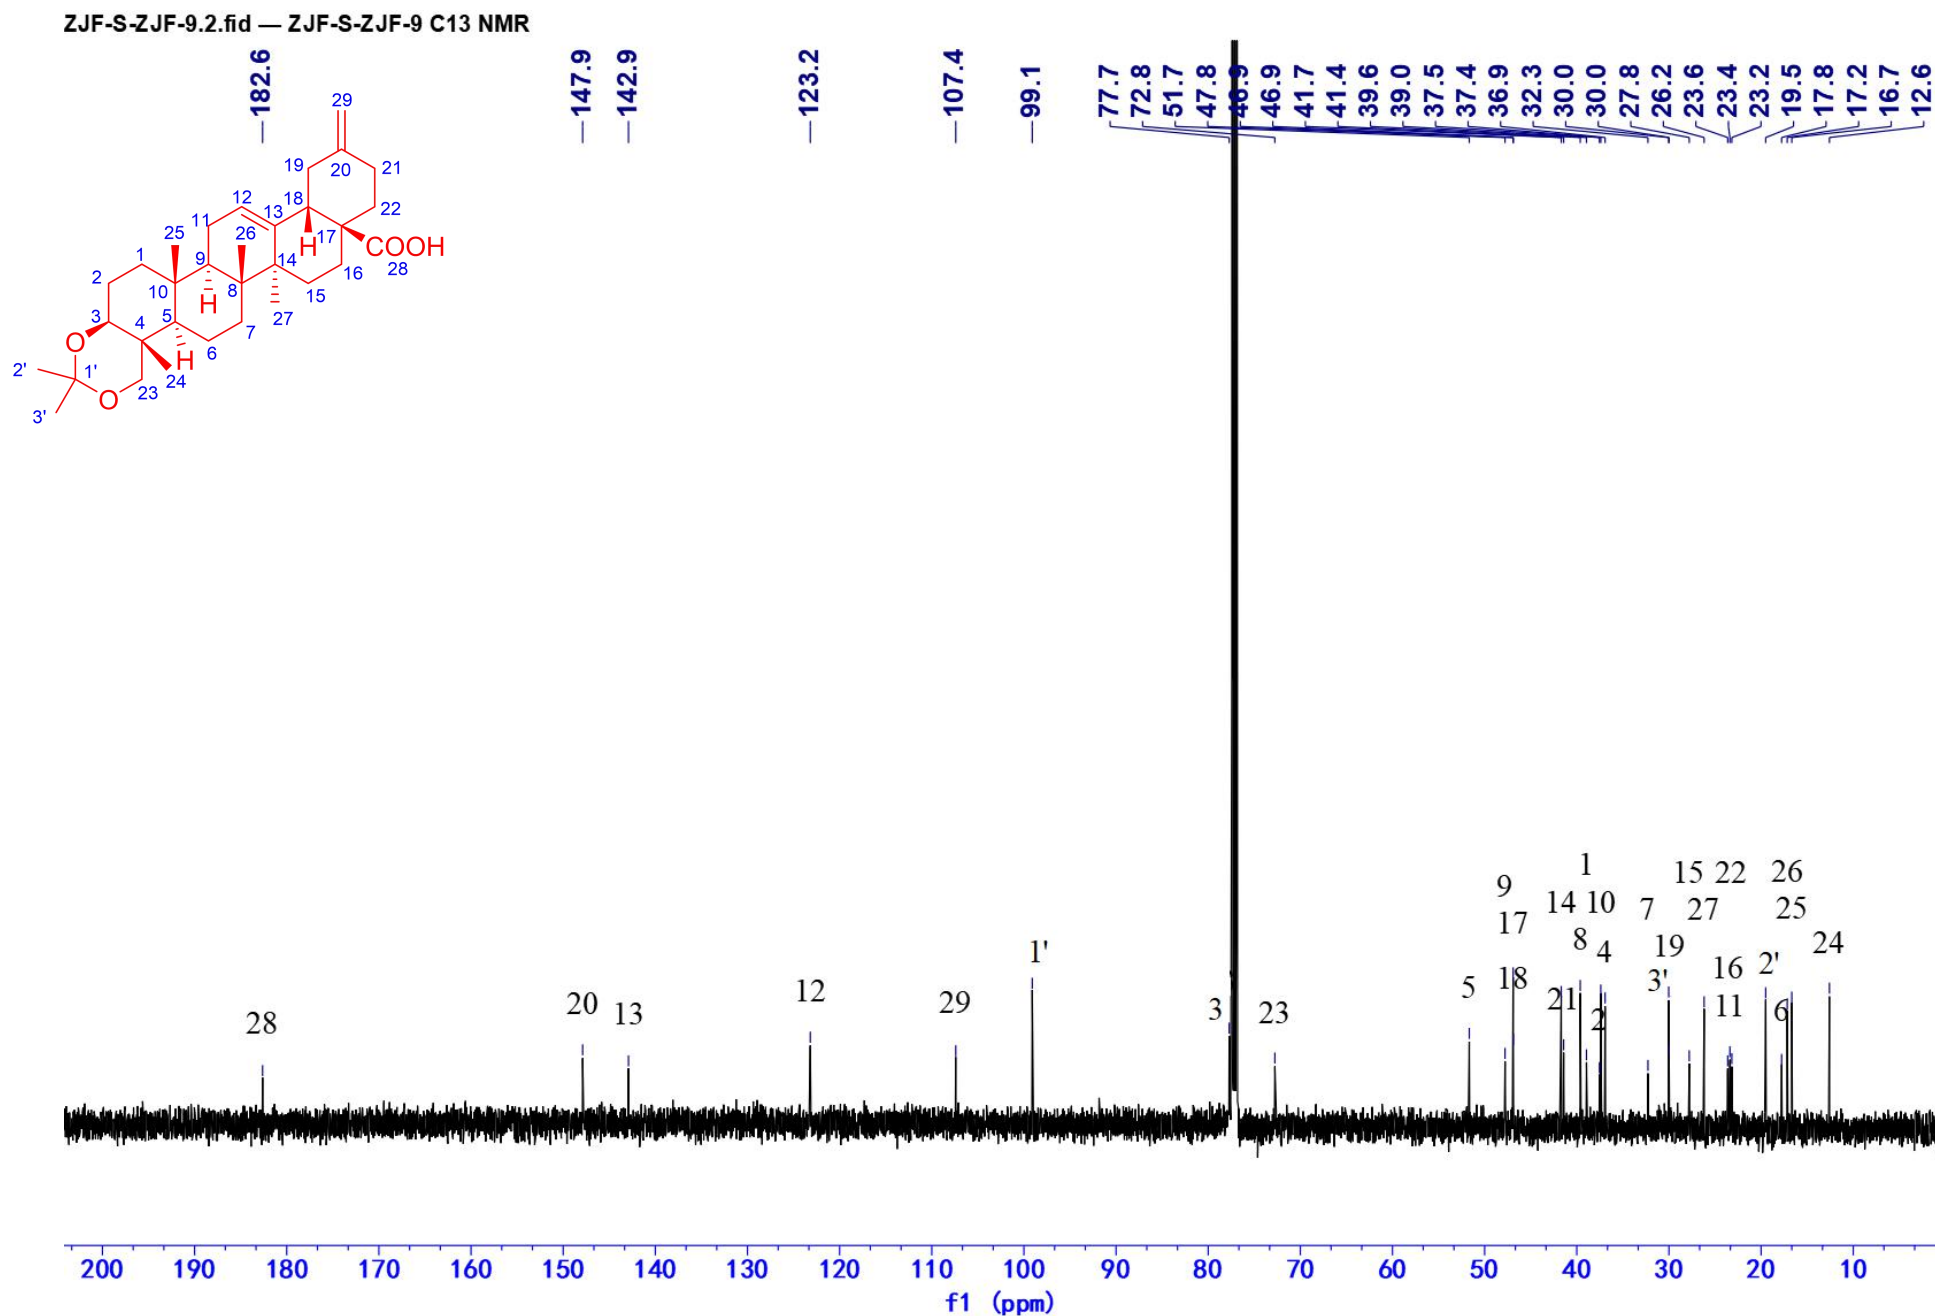

Figure S116. The  $^{13}\text{C}$  NMR Spectrum of Compound 26 in  $\text{CD}_3\text{Cl}$  (125MHz)

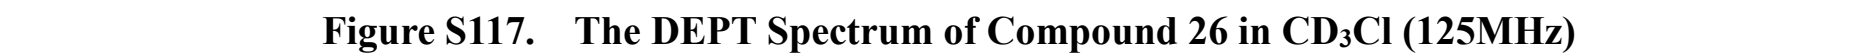

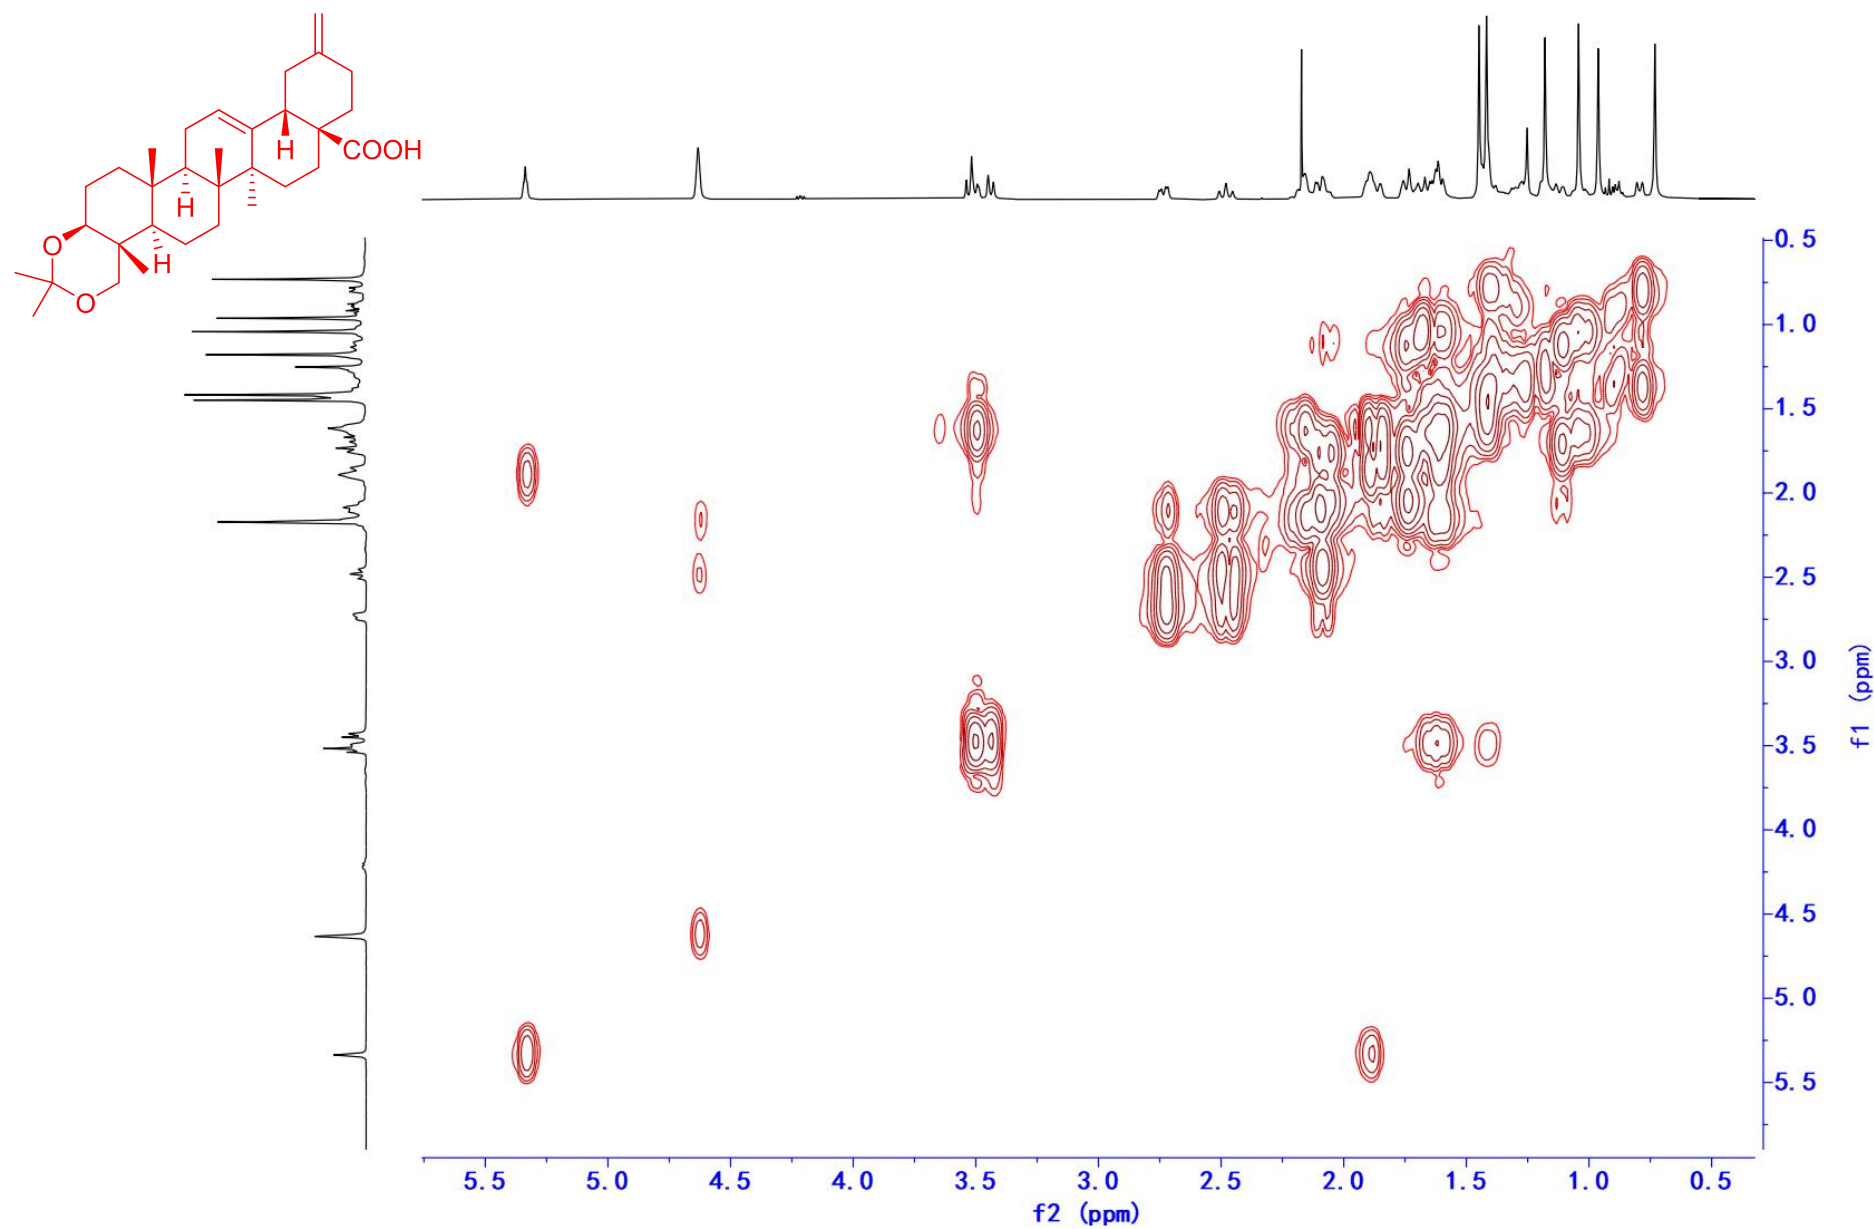

Figure S118. The  $^1\text{H}$ - $^1\text{H}$  COSY Spectrum of Compound 26 in  $\text{CD}_3\text{Cl}$  (500MHz)

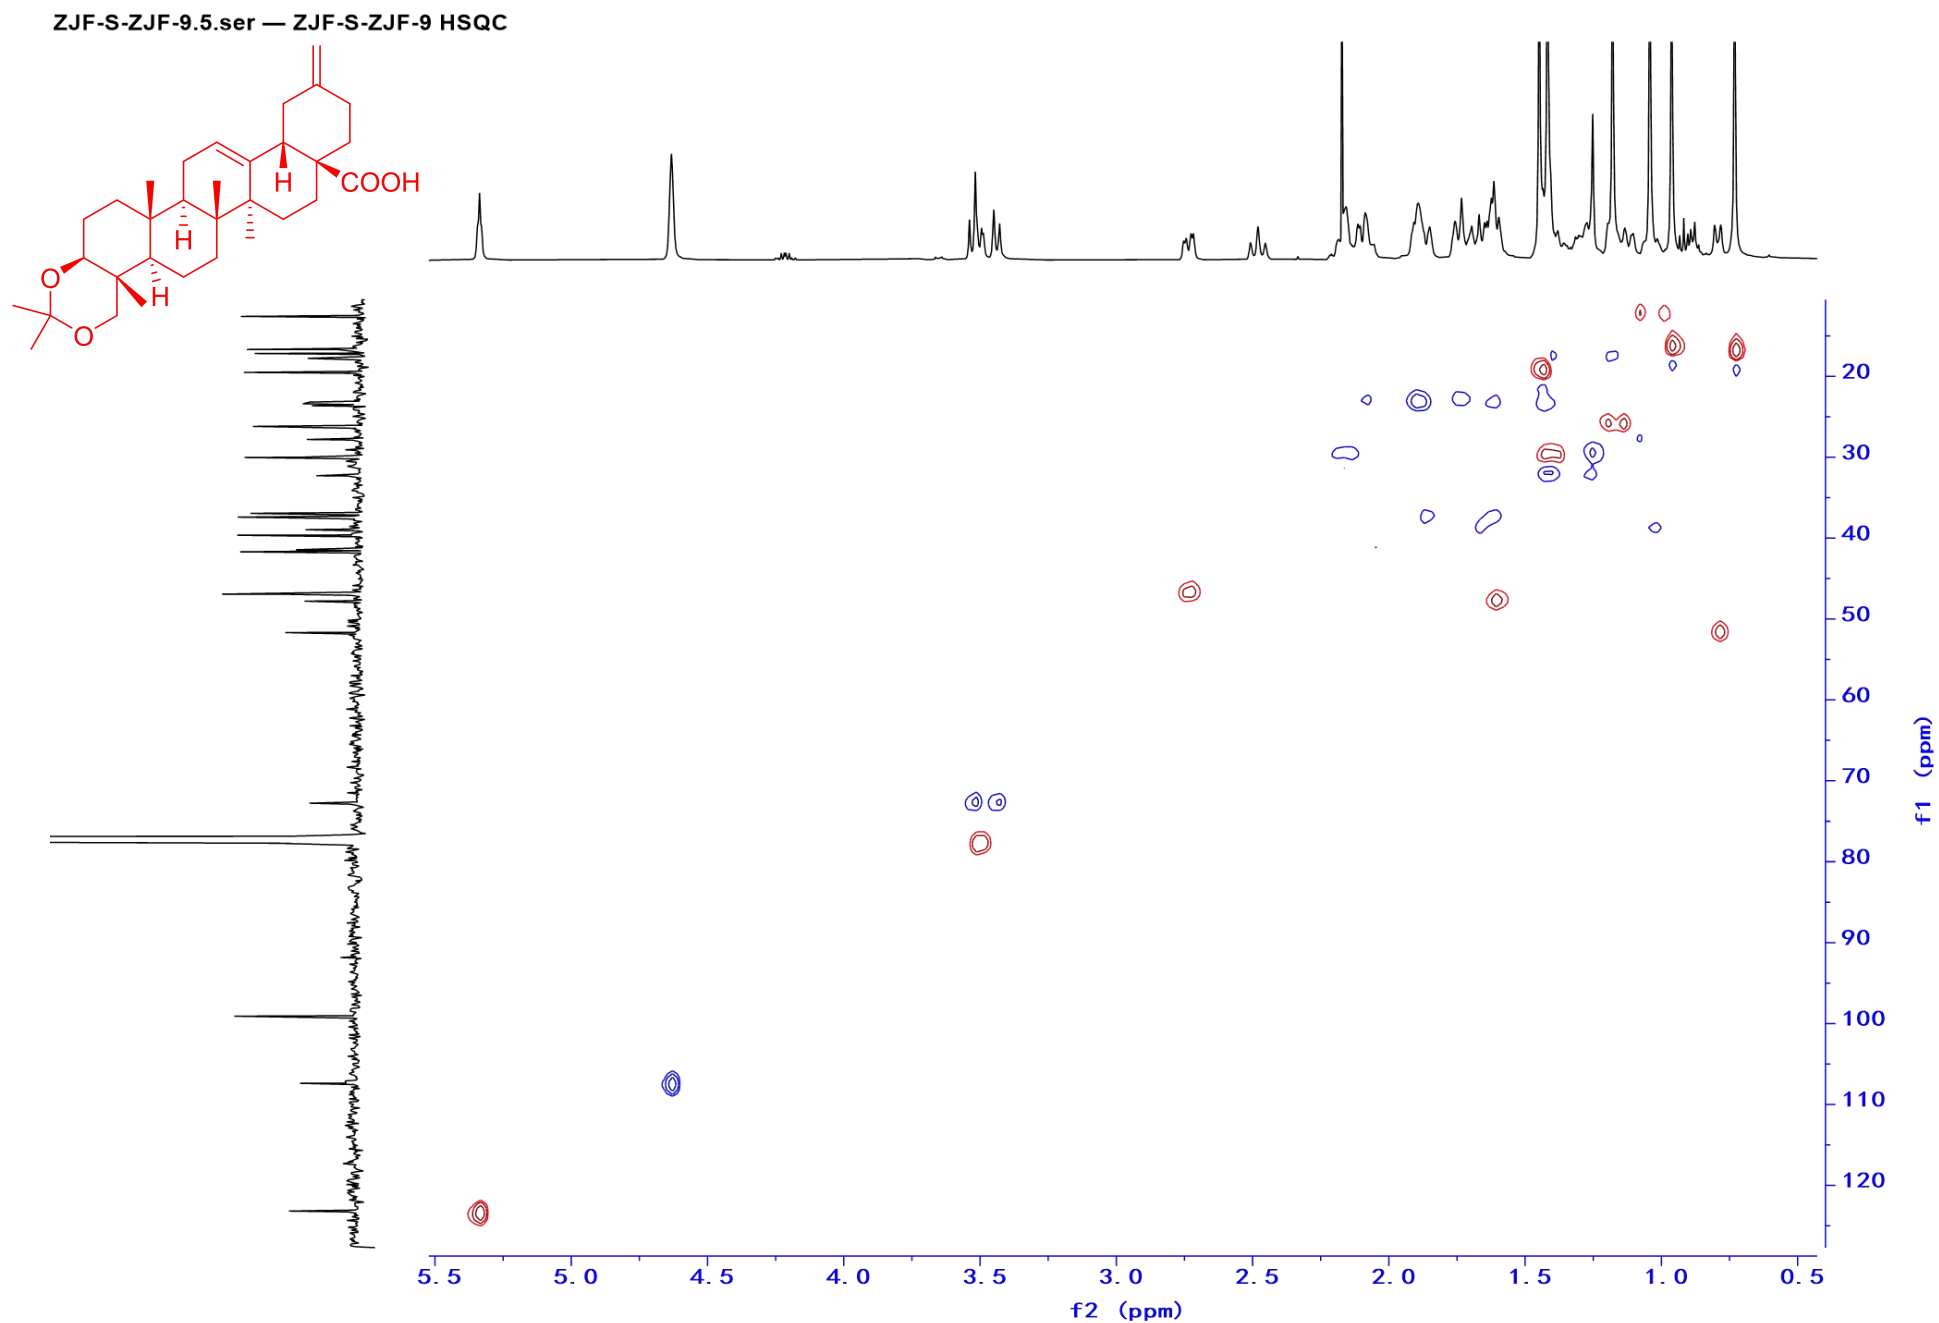

**Figure S119.** The HSQC Spectrum of Compound 26 in CD<sub>3</sub>Cl (500MHz)

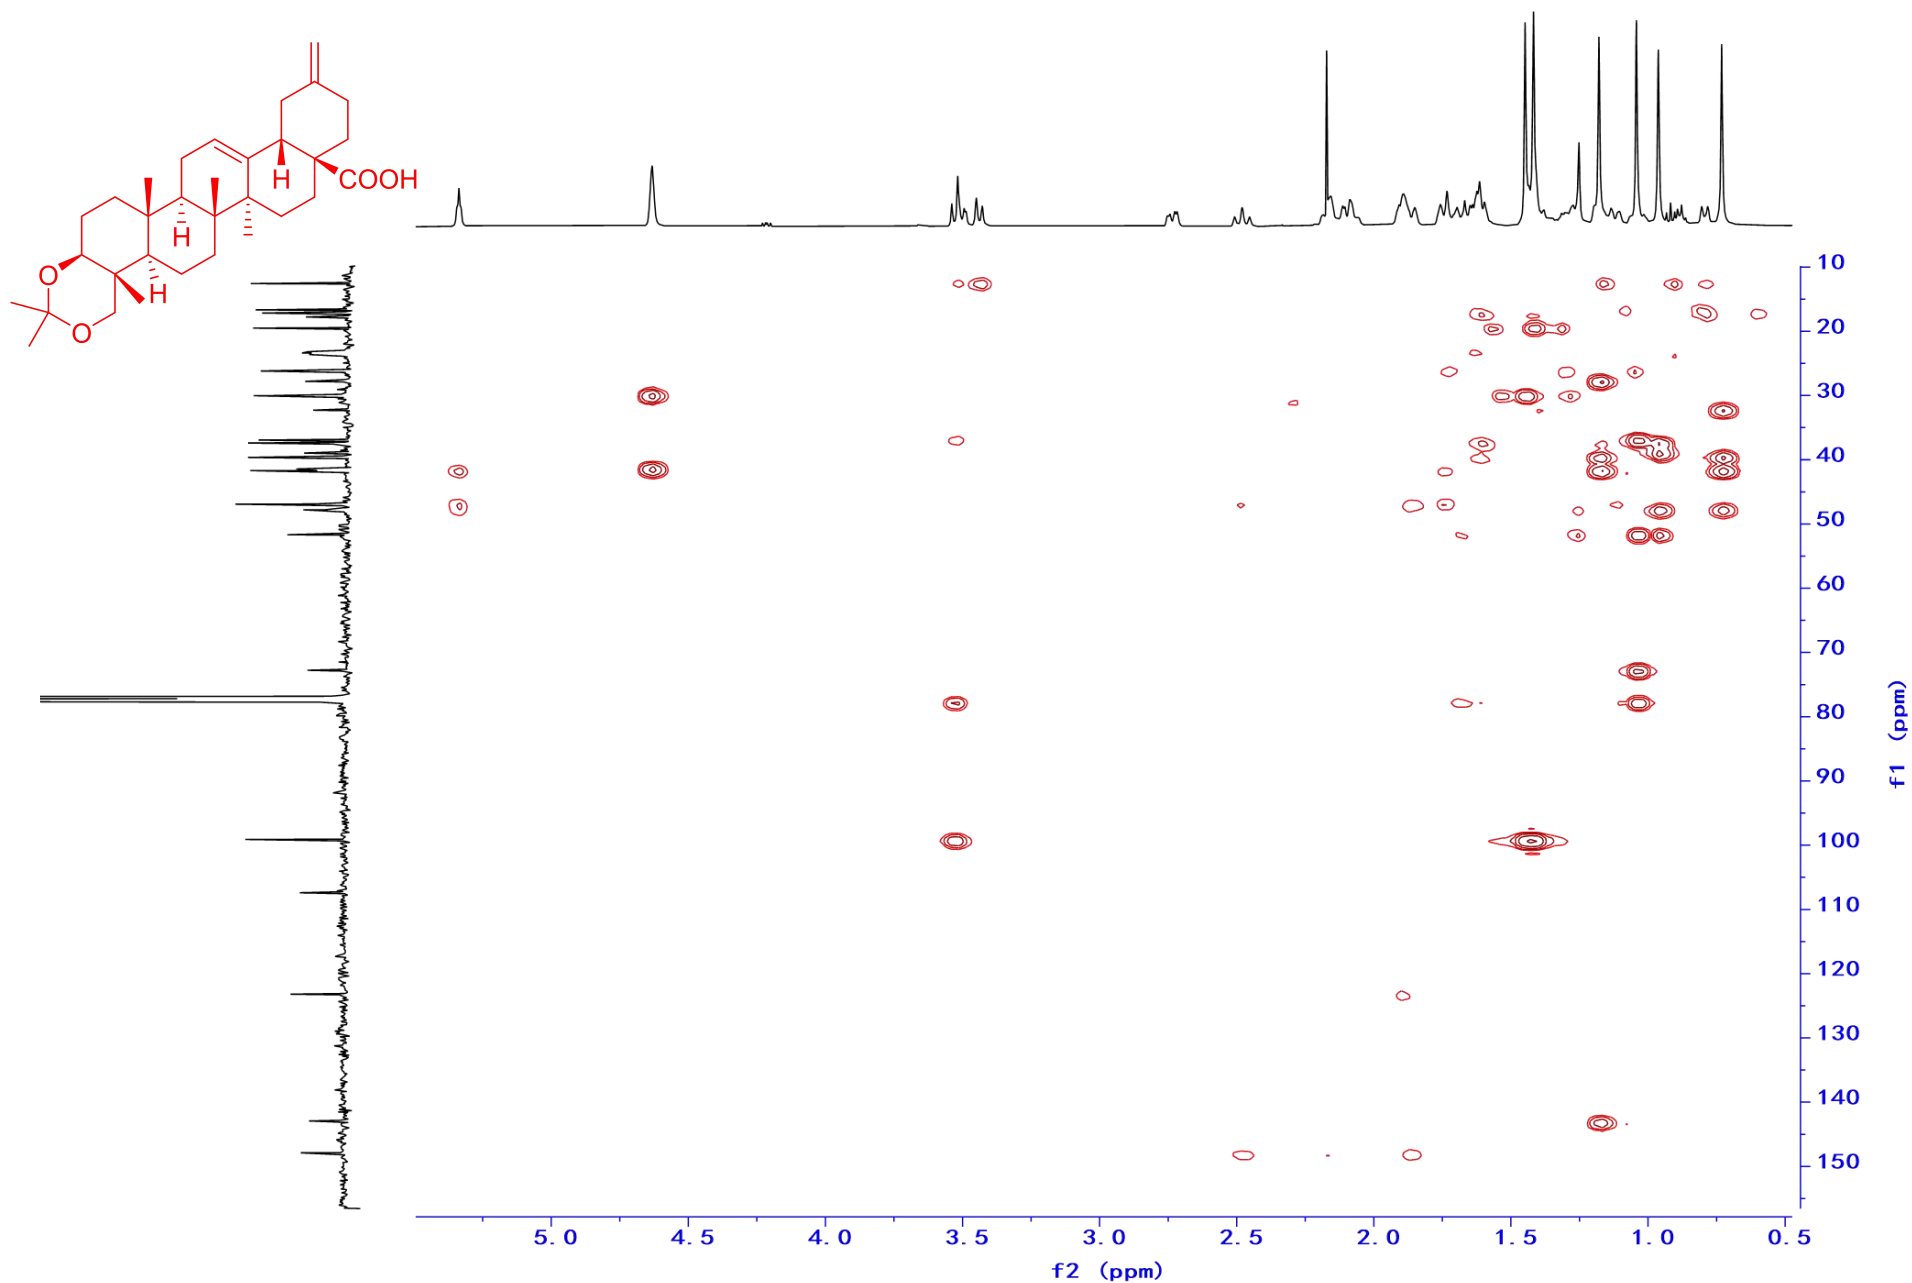

Figure S120. The HMBC Spectrum of Compound 26 in CD<sub>3</sub>Cl (500MHz)

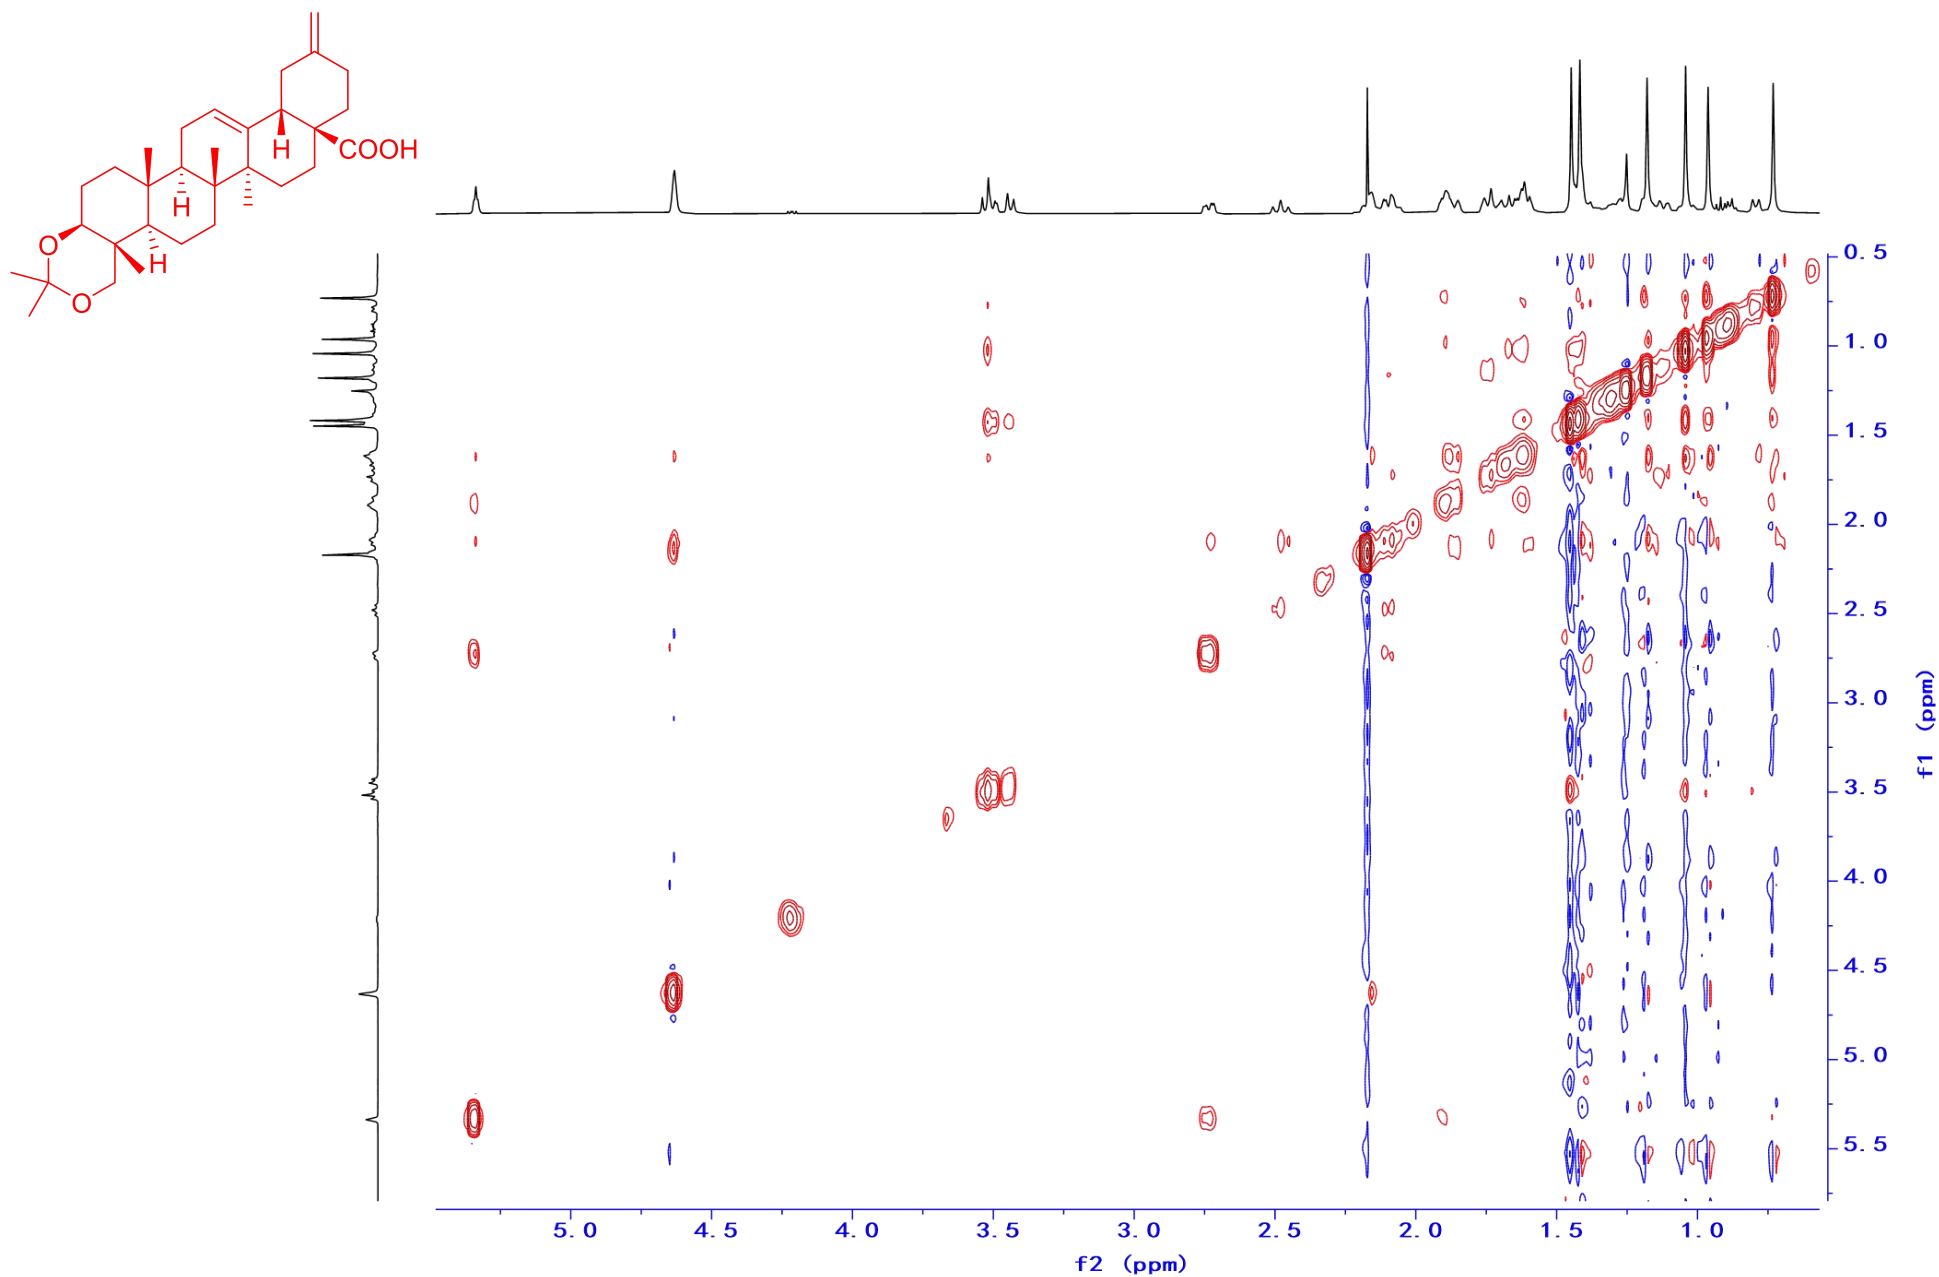

**Figure S121. The NOESY Spectrum of Compound 26 in CD<sub>3</sub>Cl (500MHz)**

## ***In silico* prediction of ECD spectrum**

All calculations were performed using Gaussian 16.<sup>1</sup> Conformation search using molecular mechanics calculations was performed in MOE (Molecular Operating Environment) 2015 with MMFF94s force field with 20 kcal mol<sup>-1</sup> upper energy limit at best level. The conformers performed with the MOE 2015 software package were further optimized by using the TDDFT method at the B3LYP/6-31G (d, p) level, and the frequency was calculated at the same level of theory. For all optimized structures, vibrational spectra were calculated to ensure that no imaginary frequencies for energy minimum were obtained. The average values were obtained by the Boltzmann distributions, using the relative Gibbs free energies as weighting factors. The stable conformers were subjected to ECD calculation by the TDDFT method at the B3LYP/6-311G+ (d, p) level with the CPCM model in MeOH. ECD spectra of different conformers were simulated using SpecDis 1.71 with a half-bandwidth of 0.3 eV,<sup>2</sup> and the final calculated ECD spectra were obtained according to the Boltzmann-calculated contribution of each conformer. The calculated ECD spectra were compared with the experimental data.

### **References.**

1. Gaussian 16, Revision A.03, M. J. Frisch, G. W. Trucks, H. B. Schlegel, G. E. Scuseria, M. A. Robb, J. R. Cheeseman, G. Scalmani, V. Barone, G. A. Petersson, H. Nakatsuji, X. Li, M. Caricato, A. V. Marenich, J. Bloino, B. G. Janesko, R. Gomperts, B. Mennucci, H. P. Hratchian, J. V. Ortiz, A. F. Izmaylov, J. L. Sonnenberg, D. Williams-Young, F. Ding, F. Lipparini, F. Egidi, J. Goings, B. Peng, A. Petrone, T. Henderson, D. Ranasinghe, V. G. Zakrzewski, J. Gao, N. Rega, G. Zheng, W. Liang, M. Hada, M. Ehara, K. Toyota, R. Fukuda, J. Hasegawa, M. Ishida, T. Nakajima, Y. Honda, O. Kitao, H. Nakai, T. Vreven, K. Throssell, J. A. Montgomery, Jr., J. E. Peralta, F. Ogliaro, M. J. Bearpark, J. J. Heyd, E. N. Brothers, K. N. Kudin, V. N. Staroverov, T. A. Keith, R. Kobayashi, J. Normand, K. Raghavachari, A. P. Rendell, J. C. Burant, S. S. Iyengar, J. Tomasi, M. Cossi, J. M. Millam, M. Klene, C. Adamo, R. Cammi, J. W. Ochterski, R. L. Martin, K. Morokuma, O. Farkas, J. B. Foresman, and D. J. Fox, Gaussian, Inc., Wallingford CT, **2016**.
2. T. Bruhn, A. Schaumlöffel, Y. Hemberger, G. Pescitelli, SpecDis version 1.71, Berlin, Germany, **2017**, <http://specdis-software.jimdo.com>.



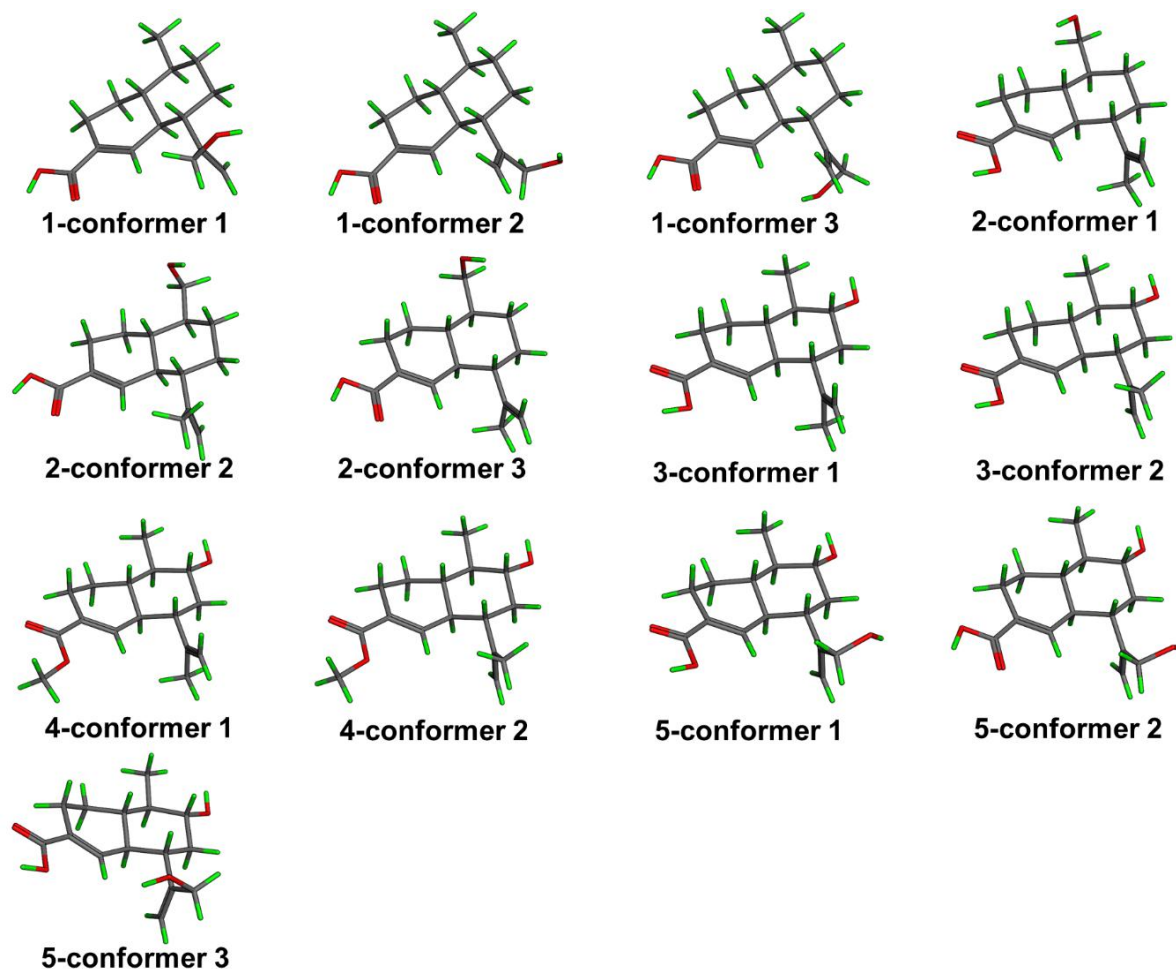

**Figure S122. Low-energy Conformers of 1-5 in MeOH**

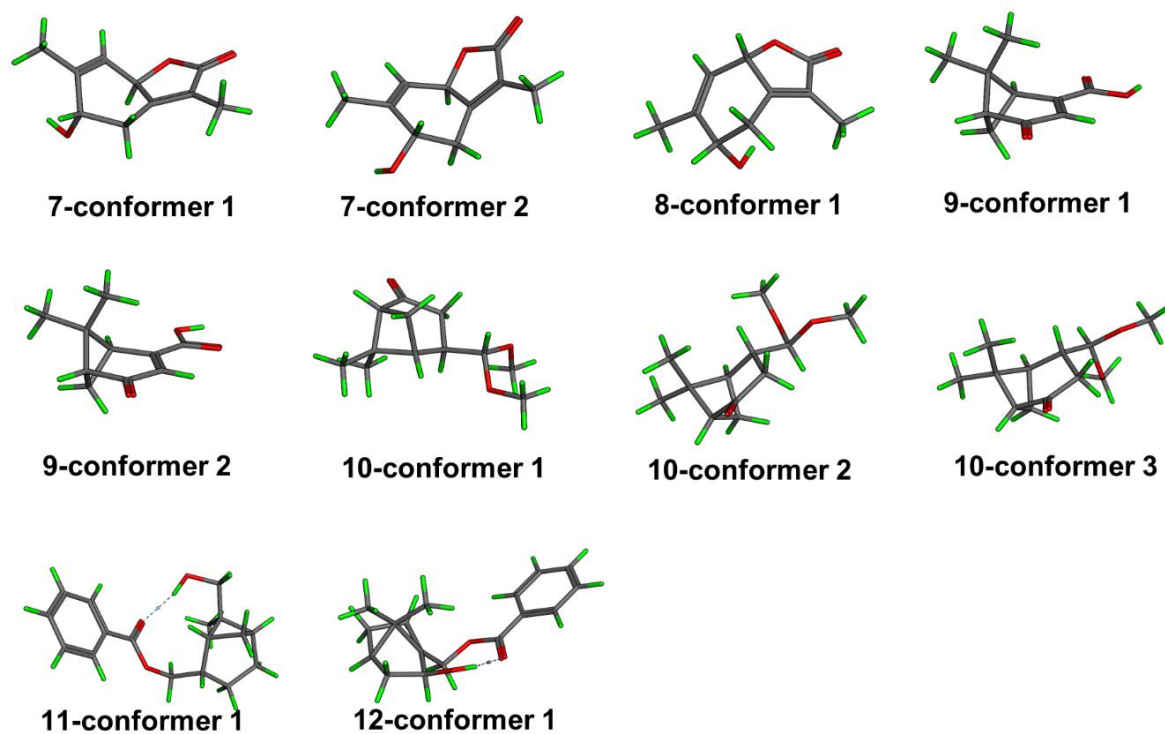

**Figure S123. Low-energy Conformers of 7-12 in MeOH**

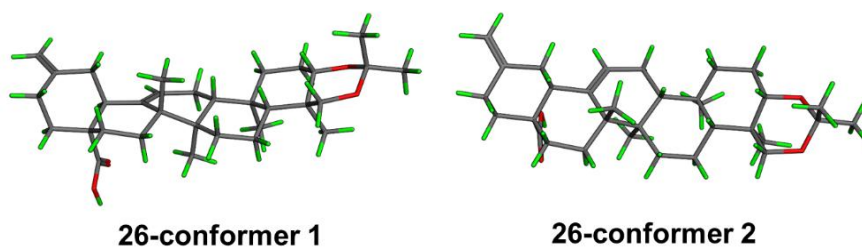

**Figure S124. Low-energy Conformers of 26 in MeOH**

**Table S1. Relative Energies, Equilibrium Populations, Extracted heats and weighting factors of the optimized conformers of 1-5, 7-12 and 26 at B3LYP/6-311+G(d,p) level in MeOH with PCM**

|           | Conformer | Relative Energies (kcal/mol) | Equilibrium Populations | Extracted heats (kcal/mol) | Boltzmann-calculated contribution(%) |
|-----------|-----------|------------------------------|-------------------------|----------------------------|--------------------------------------|
| <b>1</b>  | 1         | 0                            | 0.566488367             | -810.7540875               | 0                                    |
|           | 2         | 0.40124696                   | 0.287661470             | -810.7538160               | 64.68                                |
|           | 3         | 0.83766931                   | 0.137648574             | -810.7522632               | 35.32                                |
| <b>2</b>  | 1         | 0                            | 0.317138599             | -810.7551857               | 48.72                                |
|           | 2         | 0.05453676                   | 0.289232517             | -810.7533952               | 15.64                                |
|           | 3         | 0.22636622                   | 0.216377698             | -810.7540376               | 35.64                                |
| <b>3</b>  | 1         | 0                            | 0.563825898             | -810.7600376               | 79.72                                |
|           | 2         | 0.16441619                   | 0.427118060             | -810.7587003               | 20.28                                |
| <b>4</b>  | 1         | 0                            | 0.416040206             | -850.0683802               | 81.28                                |
|           | 2         | 0.045812536                  | 0.385063557             | -850.0670320               | 18.72                                |
| <b>5</b>  | 1         | 0                            | 0.299089009             | -886.0000824               | 34.65                                |
|           | 2         | 0.18405204                   | 0.219179905             | -885.9995412               | 20.42                                |
|           | 3         | 0.34520575                   | 0.166953925             | -886.0003855               | 44.93                                |
| <b>7</b>  | 1         | 0                            | 0.567562022             | -614.1338724               | 0.9                                  |
|           | 2         | 0.16099747                   | 0.432437978             | -614.1383070               | 99.1                                 |
| <b>8</b>  | 1         | 0                            | 0.999986637             | -614.1384280               | 100                                  |
| <b>9</b>  | 1         | 0                            | 0.608080616             | -614.1207607               | 70.27                                |
|           | 2         | 0.26007891                   | 0.391919384             | -614.1198746               | 29.73                                |
| <b>10</b> | 1         | 0                            | 0.377160690             | -695.1496450               | 43.11                                |
|           | 2         | 0.16968693                   | 0.283180483             | -695.1497852               | 50.16                                |
|           | 3         | 0.47312698                   | 0.169626650             | -695.1479860               | 6.73                                 |
| <b>11</b> | 1         | 0                            | 0.789955155             | -886.9608809               | 100                                  |
| <b>12</b> | 1         | 0                            | 0.940813546             | -886.9765052               | 100                                  |
| <b>26</b> | 1         | 0                            | 0.580513415             | -1549.6159635              | 58.54                                |
|           | 2         | 0.197291                     | 0.416009598             | -1549.6156148              | 41.46                                |

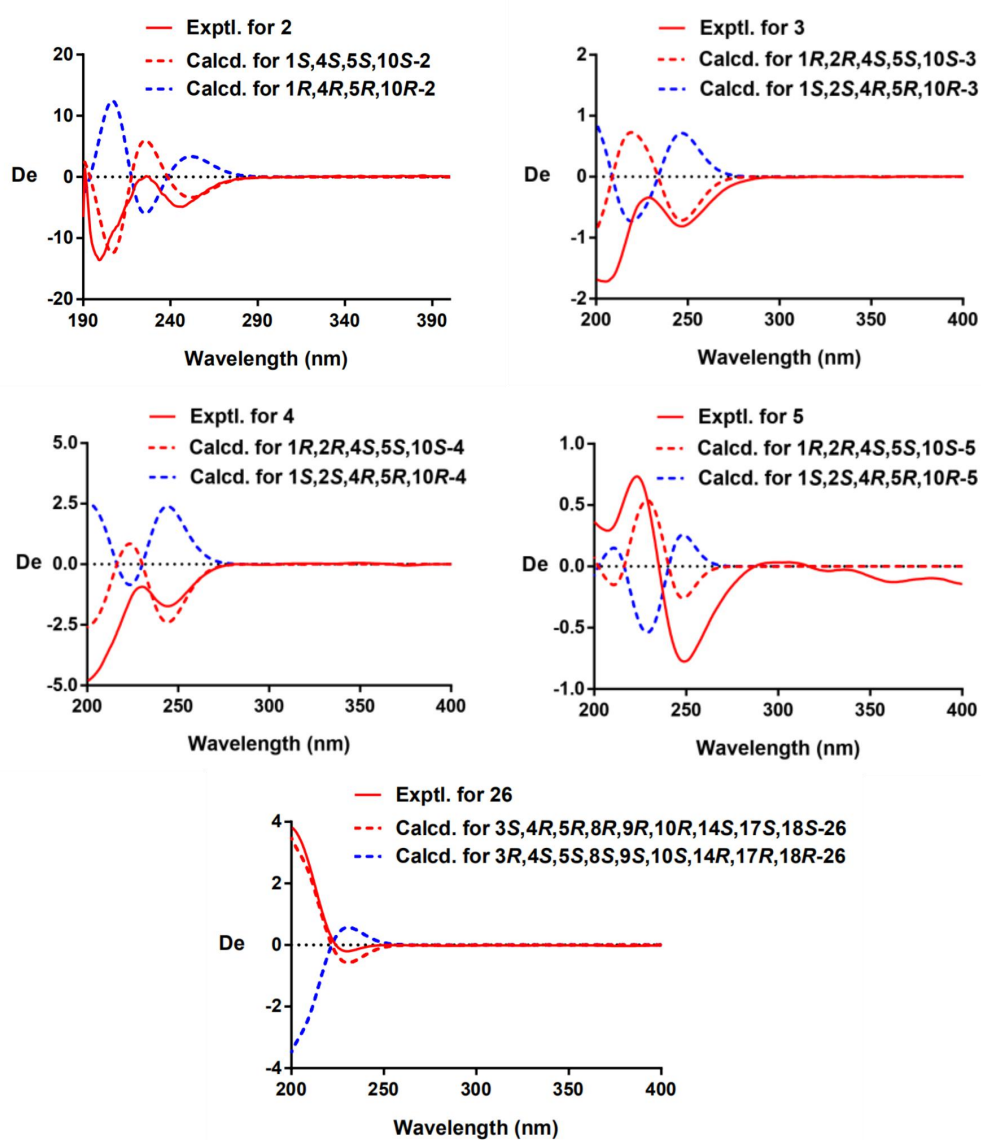

**Figure S125. Experimental and calculated ECD data of compounds 2-5 and 26**

## General Experimental Procedures

Melting points were obtained on a Boetius Micro Melting Point Apparatus. Optical rotations were measured on a Rudolph Research Autopol III automatic polarimeter. UV spectra were measured on a Cary 300 spectrometer. ECD spectra were recorded on a JASCO J-815 spectrometer. IR spectra were obtained on a Nicolet Impact 400 FT-IR Spectrophotometer. The NMR experiments were conducted on a Bruker spectrometer (600 MHz for  $^1\text{H}$  or 150 MHz for  $^{13}\text{C}$ ) or a Varian INOVA spectrometer (500 MHz for  $^1\text{H}$  or 125 MHz for  $^{13}\text{C}$ ) equipped with an inverse detection probe. HR-ESIMS data were acquired on an Agilent 6520 Accurate-Mass Q-TOFL CMS spectrometers (Agilent Technologies, Ltd., Santa Clara, CA, USA). Column chromatography (CC) was run using MCI gel (CHP20P), silica gel (100-200 or 200-300 mesh, Qingdao Marine Chemical Inc., China), and Sephadex LH-20 (Pharmacia Biotech AB, Uppsala Sweden). Analytical HPLC was performed with an Agilent HP 1260 using a Titank column (Guangzhou FLM Scientific Instrument Co., Ltd.) packed with  $\text{C}_{18}$  (250  $\times$  4.6 mm, 5  $\mu\text{m}$ ). HPLC separation was conducted on Waters HPLC equipment, namely, a Waters 600 pump, a Waters 600 controller, and Waters 2487 dual  $\lambda$  absorbance detector, using the following columns: Shiseido Capcell Pak MGIII  $\text{C}_{18}$  (250  $\times$  4.6 mm, 5  $\mu\text{m}$ ), Waters XBridge<sup>TM</sup> Prep Shield RP<sub>18</sub> (250  $\times$  10 mm, 5  $\mu\text{m}$ ), Welch Ultimate<sup>®</sup> XB-Phenyl (250  $\times$  10 mm, 5  $\mu\text{m}$ ) and Welch Ultimate<sup>®</sup> XB-C8 (250  $\times$  10 mm, 5  $\mu\text{m}$ ). All fluorescence-based assays were performed on a SpectraMax<sup>®</sup> iD3 Molecular Device.

**Table S2. The Inhibitory Activity of Fractions A-J Against hCEs**

| Fractions | Inhibition (%) 10 $\mu$ g/mL |              |
|-----------|------------------------------|--------------|
|           | hCES1A1                      | hCES2A1      |
| A         | <b>67.19</b>                 | <b>59.79</b> |
| B         | <b>74.03</b>                 | <b>78.27</b> |
| C         | <b>64.64</b>                 | <b>92.02</b> |
| D         | <b>52.86</b>                 | <b>78.14</b> |
| E         | <b>37.11</b>                 | <b>71.95</b> |
| F         | <b>15.21</b>                 | <b>52.70</b> |
| G         | <b>2.99</b>                  | <b>58.88</b> |
| H         | <b>20.71</b>                 | <b>64.62</b> |
| I         | <b>13.28</b>                 | <b>53.31</b> |
| J         | <b>-0.29</b>                 | <b>45.08</b> |

**Table S3. IC<sub>50</sub> Values of 1, 6, 10, 11, 13–15, 18–20, 22, and 24–26 on hCES2A1**

| compounds  | IC <sub>50</sub> ( $\mu$ M) | compounds | IC <sub>50</sub> ( $\mu$ M) |
|------------|-----------------------------|-----------|-----------------------------|
| <b>1</b>   | 5.1 $\pm$ 0.44              | <b>18</b> | 14.5 $\pm$ 2.84             |
| <b>6</b>   | 3.8 $\pm$ 0.53              | <b>19</b> | 1.9 $\pm$ 0.26              |
| <b>10</b>  | 6.3 $\pm$ 0.58              | <b>20</b> | 4.6 $\pm$ 0.59              |
| <b>11</b>  | 8.2 $\pm$ 0.91              | <b>22</b> | 5.0 $\pm$ 0.98              |
| <b>13</b>  | 10.2 $\pm$ 1.39             | <b>24</b> | 2.2 $\pm$ 0.23              |
| <b>14</b>  | 16.8 $\pm$ 2.79             | <b>25</b> | 5.3 $\pm$ 0.66              |
| <b>15</b>  | 5.8 $\pm$ 1.10              | <b>26</b> | 4.6 $\pm$ 0.27              |
| <b>LPA</b> | 1.20 $\pm$ 0.10             |           |                             |

**Table S4. IC<sub>50</sub> Values of 18–26 on hCES1A1**

| compounds | IC <sub>50</sub> ( $\mu$ M) |
|-----------|-----------------------------|
| <b>18</b> | 0.14 $\pm$ 0.01             |
| <b>19</b> | 2.12 $\pm$ 0.12             |
| <b>20</b> | 0.13 $\pm$ 0.02             |
| <b>21</b> | 0.26 $\pm$ 0.04             |
| <b>22</b> | 0.57 $\pm$ 0.03             |
| <b>23</b> | 0.37 $\pm$ 0.04             |
| <b>24</b> | 1.1 $\pm$ 0.10              |
| <b>25</b> | 2.3 $\pm$ 0.21              |
| <b>26</b> | 4.1 $\pm$ 0.57              |
